# Supplementary material for: Conditional wealth to estimate association of wealth mobility with health and human capital in low- and middle-income country cohorts
Source: Research Square preprint supplement (doi:10.21203/rs.3.rs-1312582/v1), 2022-03-01

$w_2 = -1 + -1 * w_1 + N(0, 0.2);$   
Variance at time 2: time 1 = 1.1

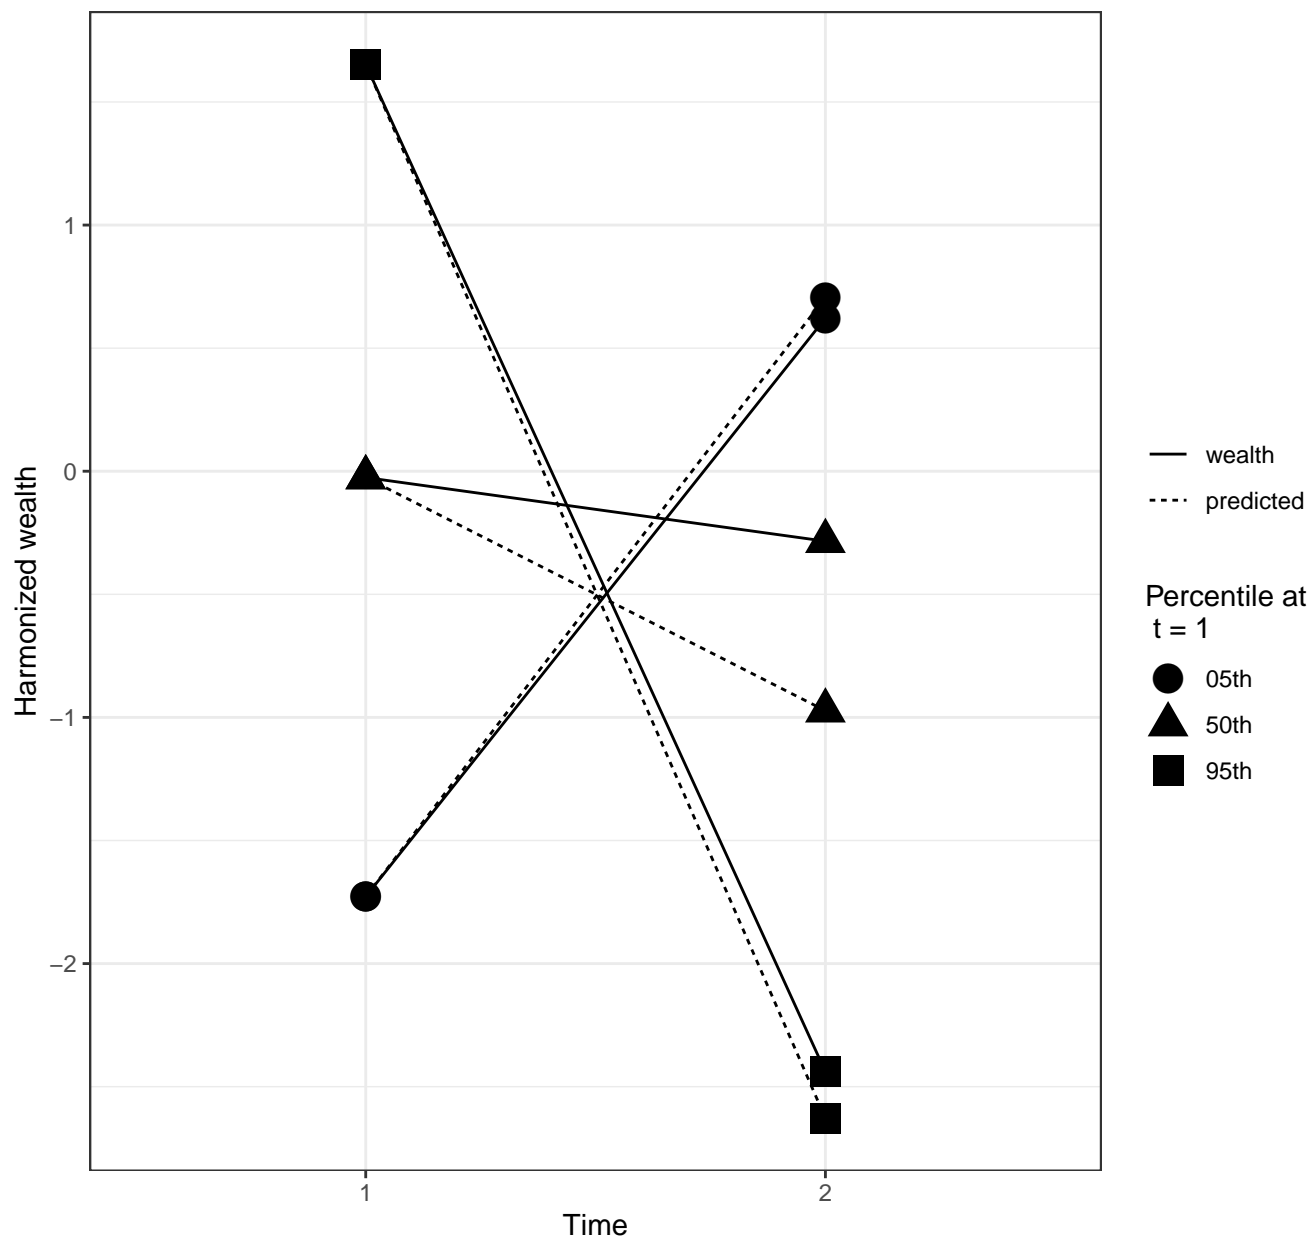

$w_2 = -0.5 + -1 * w_1 + N(0, 0.2);$   
Variance at time 2: time 1 = 1.1

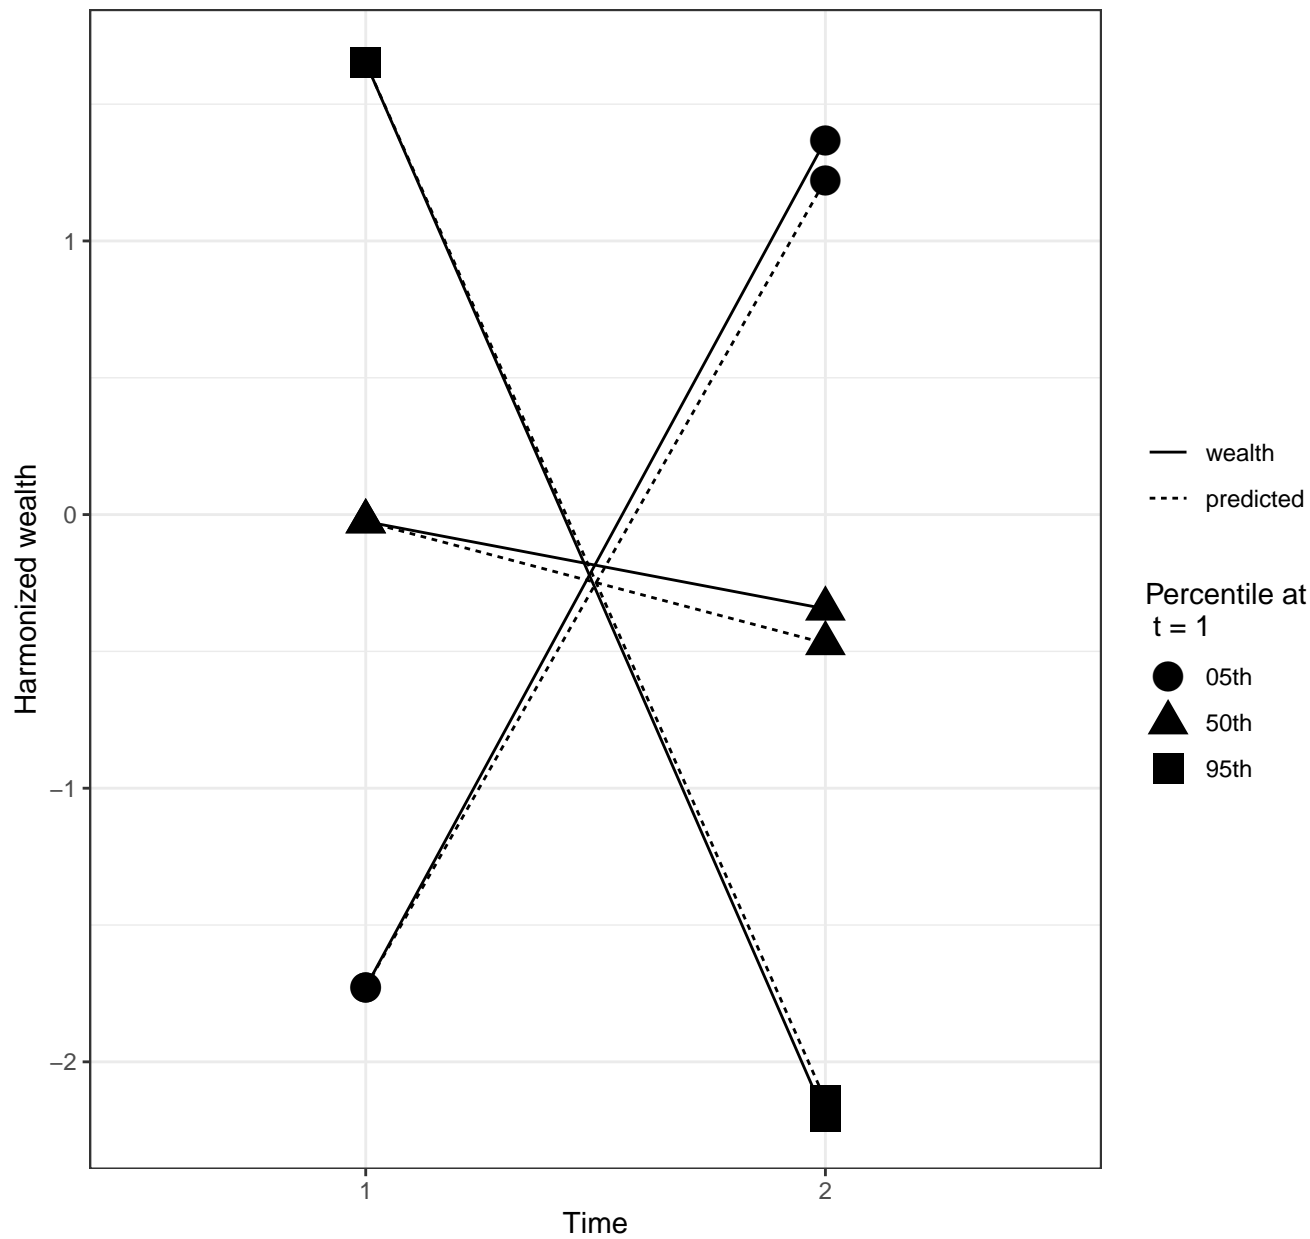

$w_2 = -0.3 + -1 \cdot w_1 + N(0, 0.2);$   
Variance at time 2: time 1 = 1.1

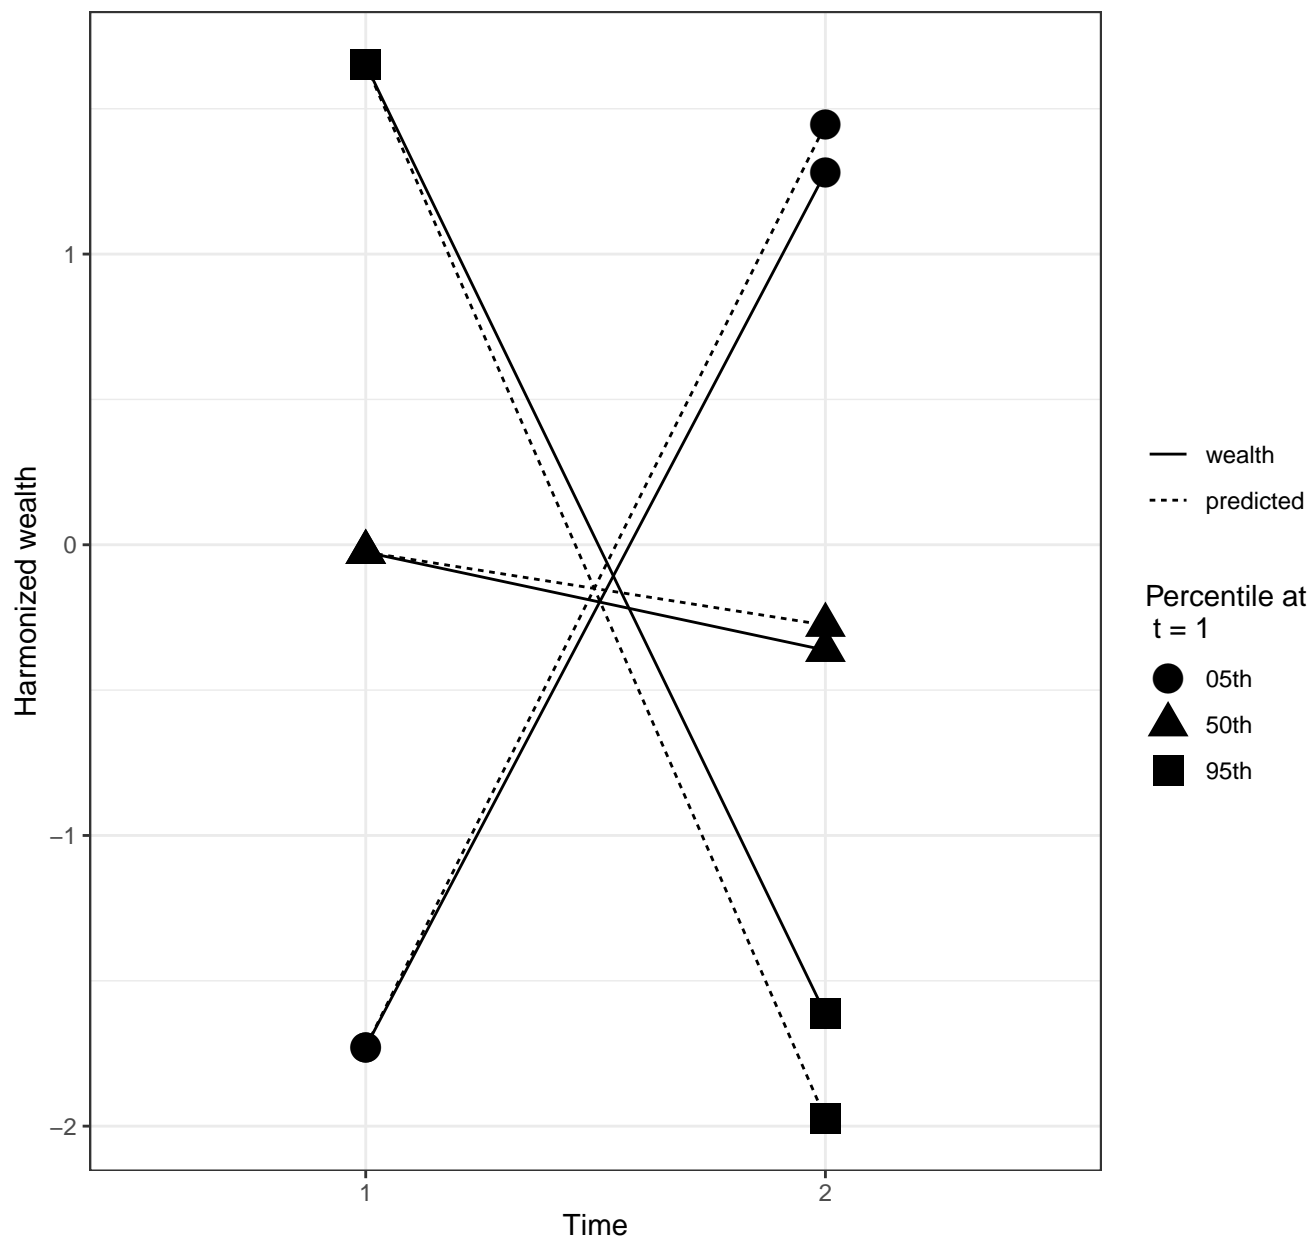

$w_2 = 0 + -1 * w_1 + N(0, 0.2);$   
Variance at time 2: time 1 = 1.1

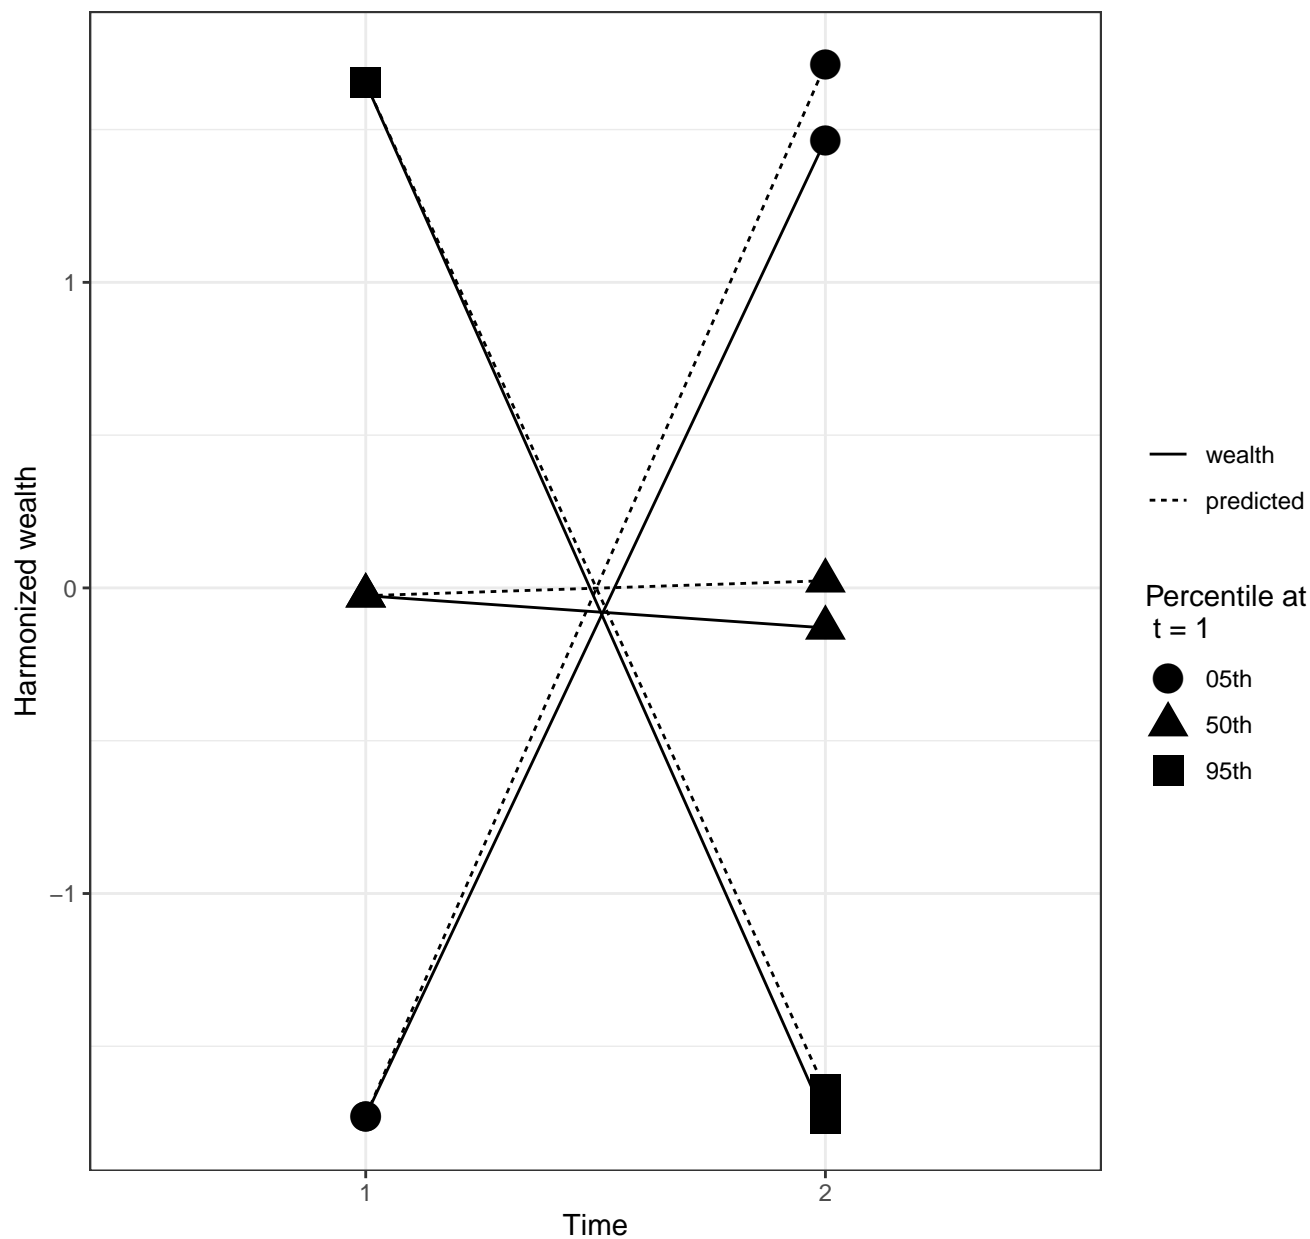

$w_2 = 0.3 + -1 * w_1 + N(0, 0.2);$   
Variance at time 2: time 1 = 1.1

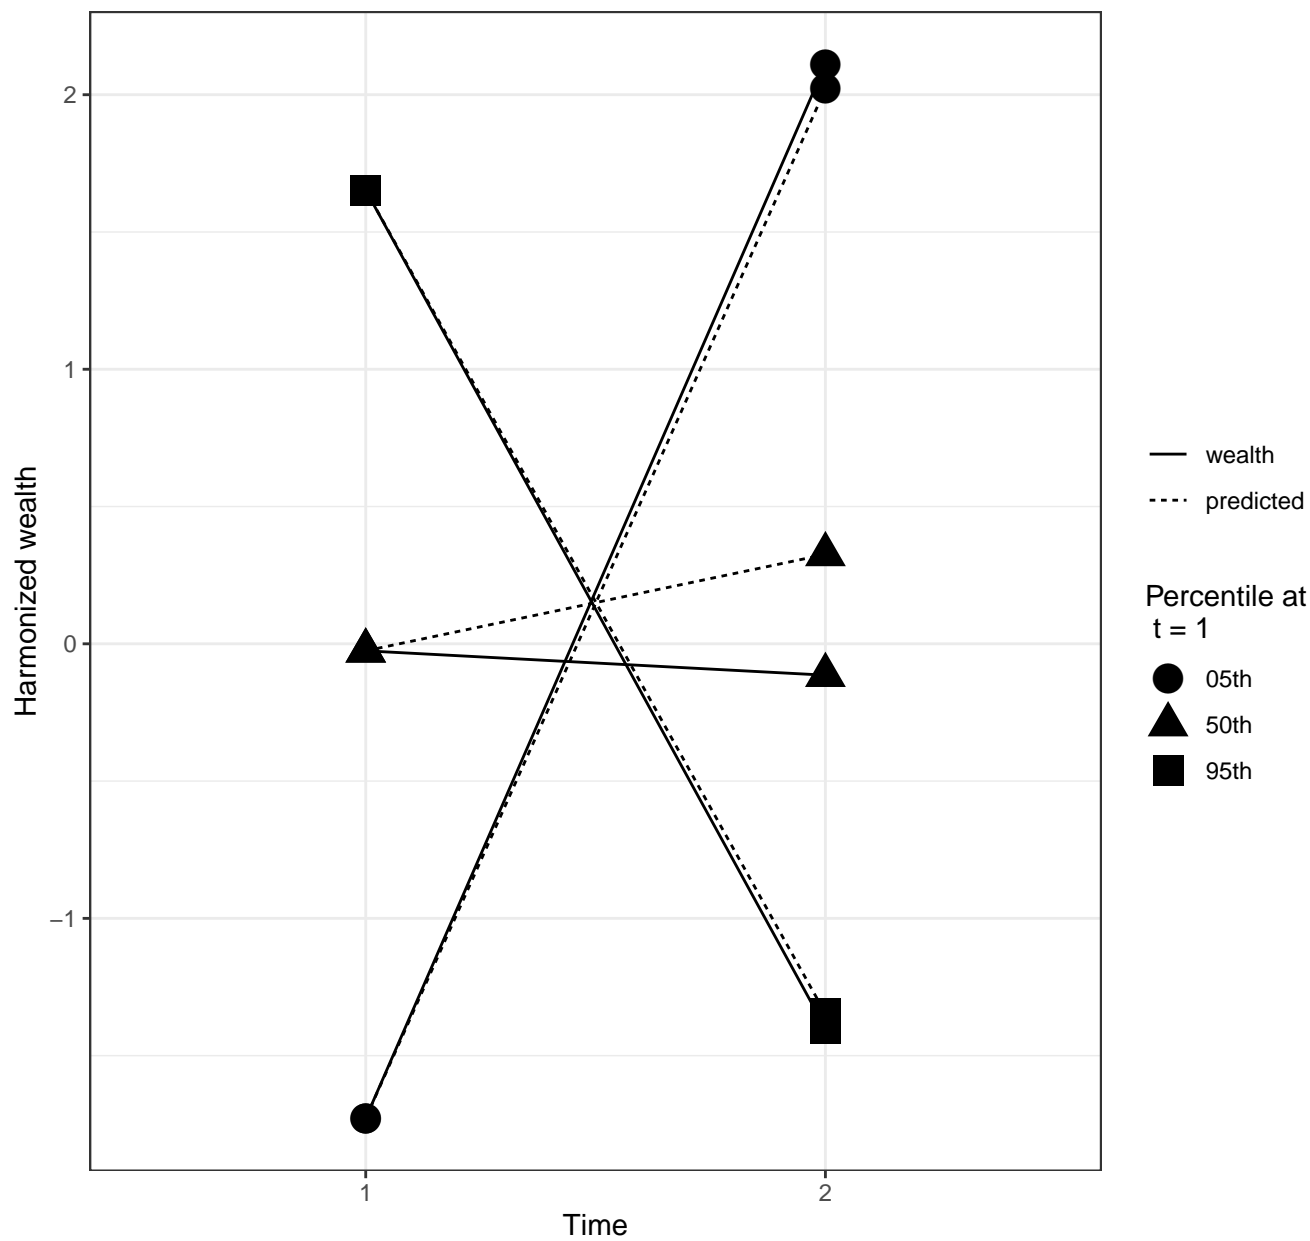

$w_2 = 0.5 + -1 * w_1 + N(0,0.2);$   
Variance at time 2: time 1 = 1.1

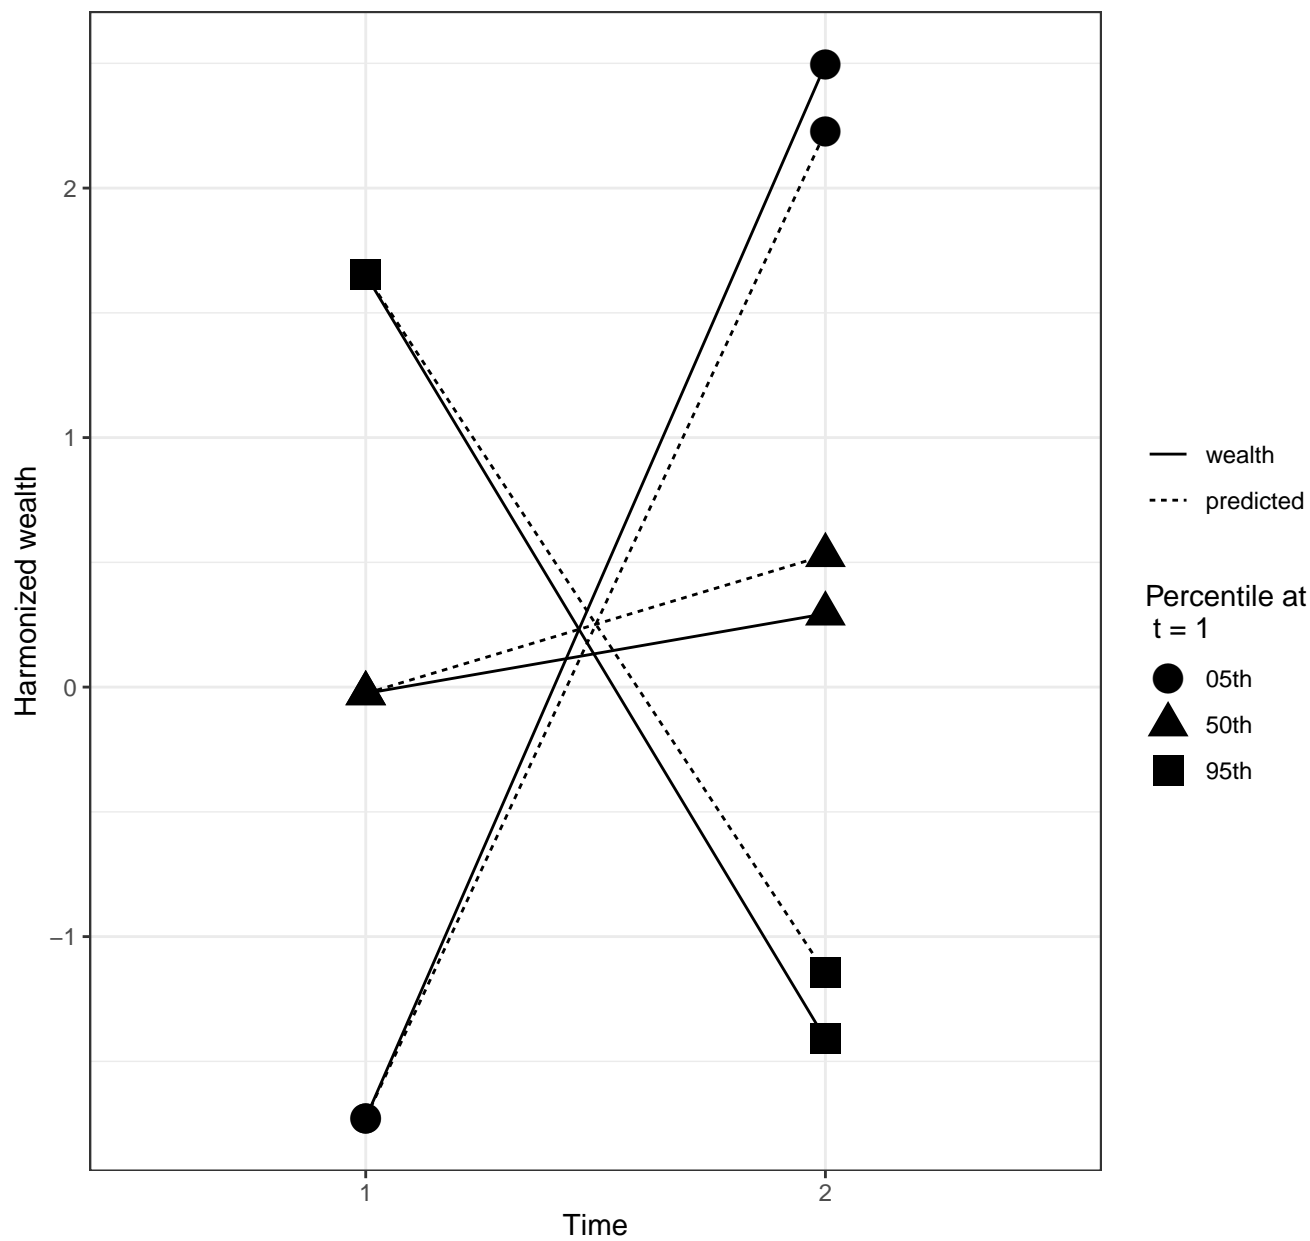

$w_2 = 1 + -1 * w_1 + N(0, 0.2);$   
Variance at time 2: time 1 = 1.1

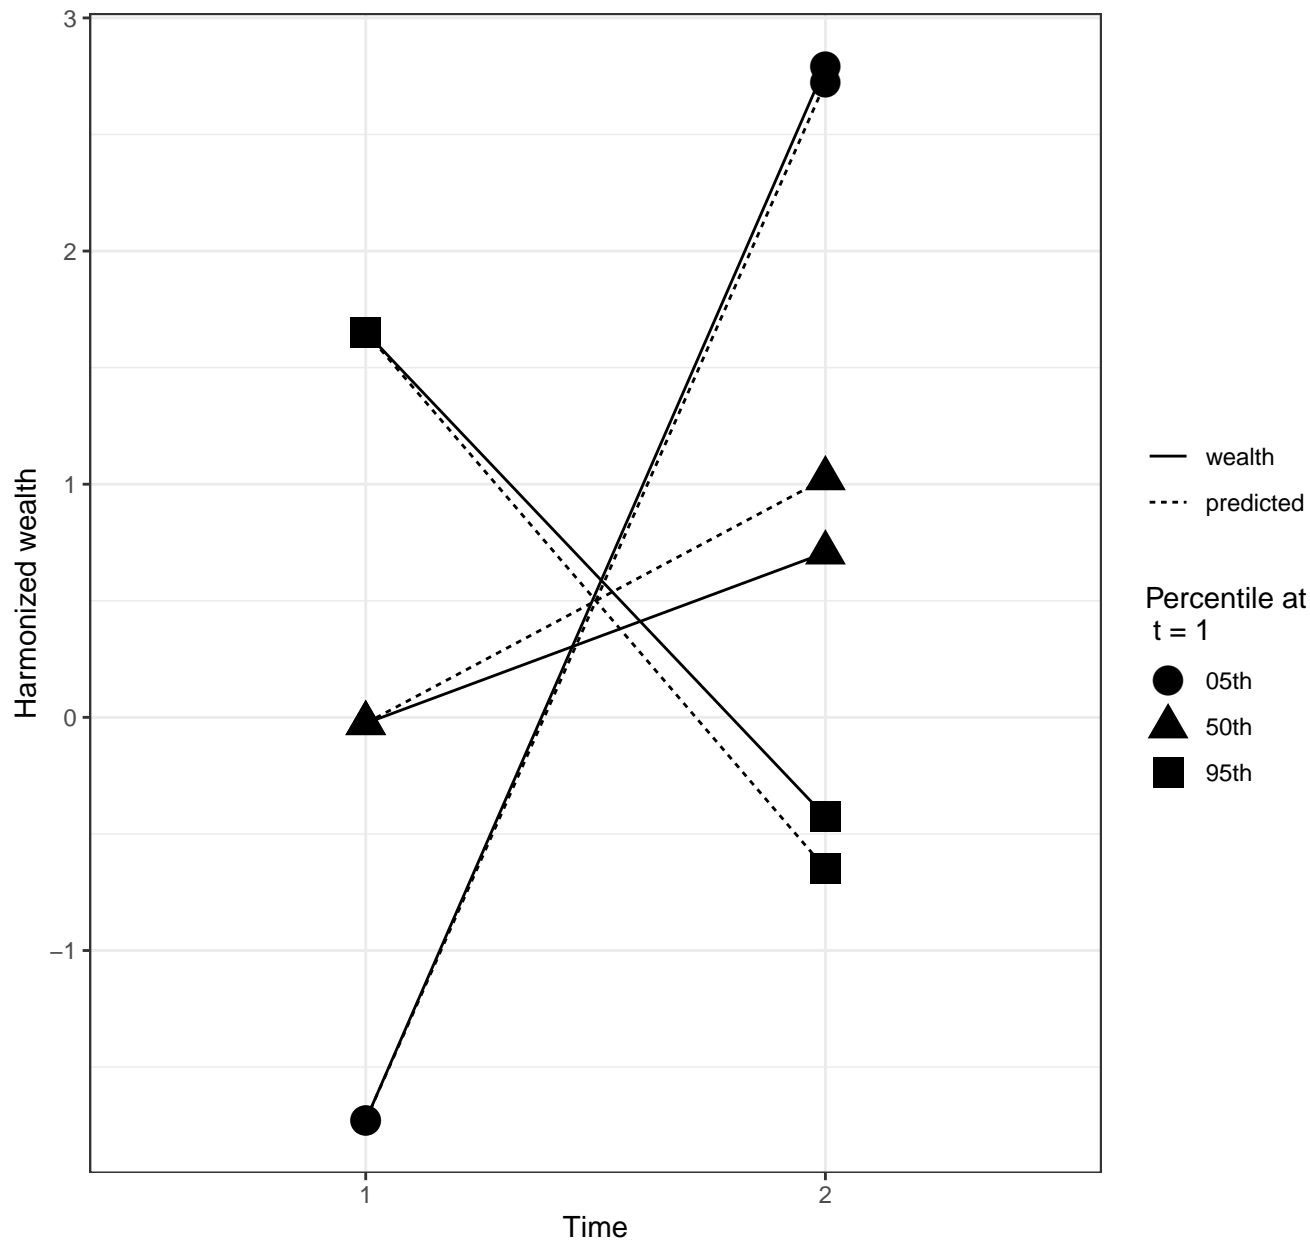

$w_2 = -1 + -0.5*w_1 + N(0,0.2);$   
Variance at time 2: time 1 = 0.3

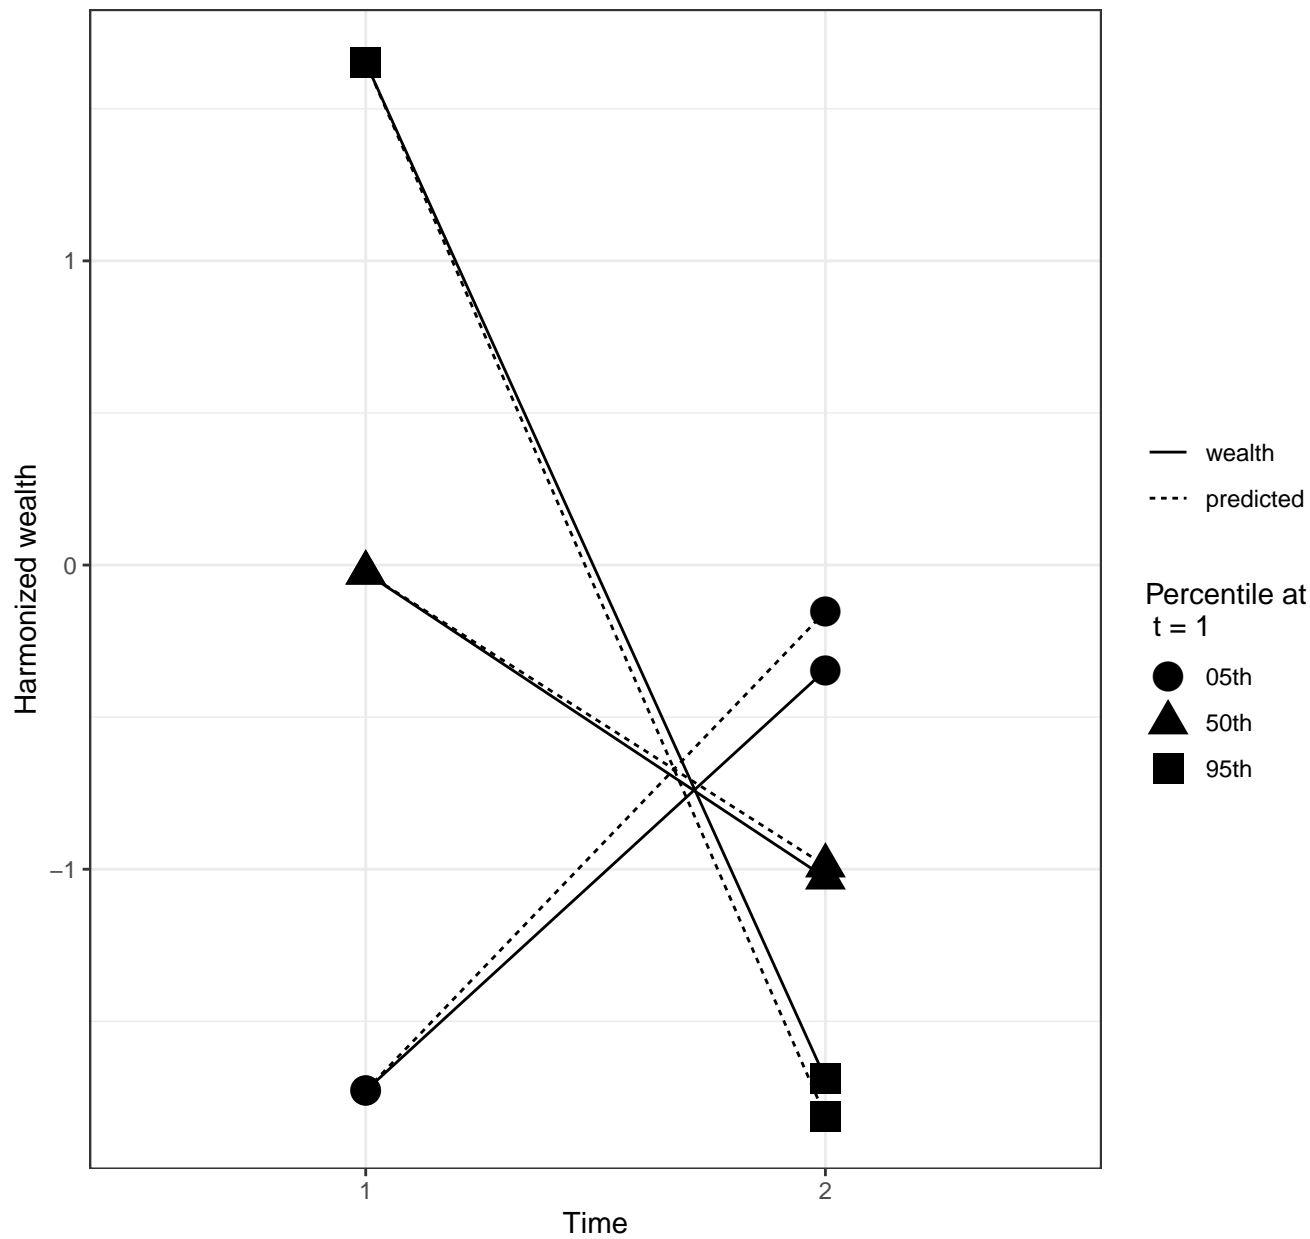



$w_2 = -0.5 + -0.5*w_1 + N(0,0.2);$   
Variance at time 2: time 1 = 0.3

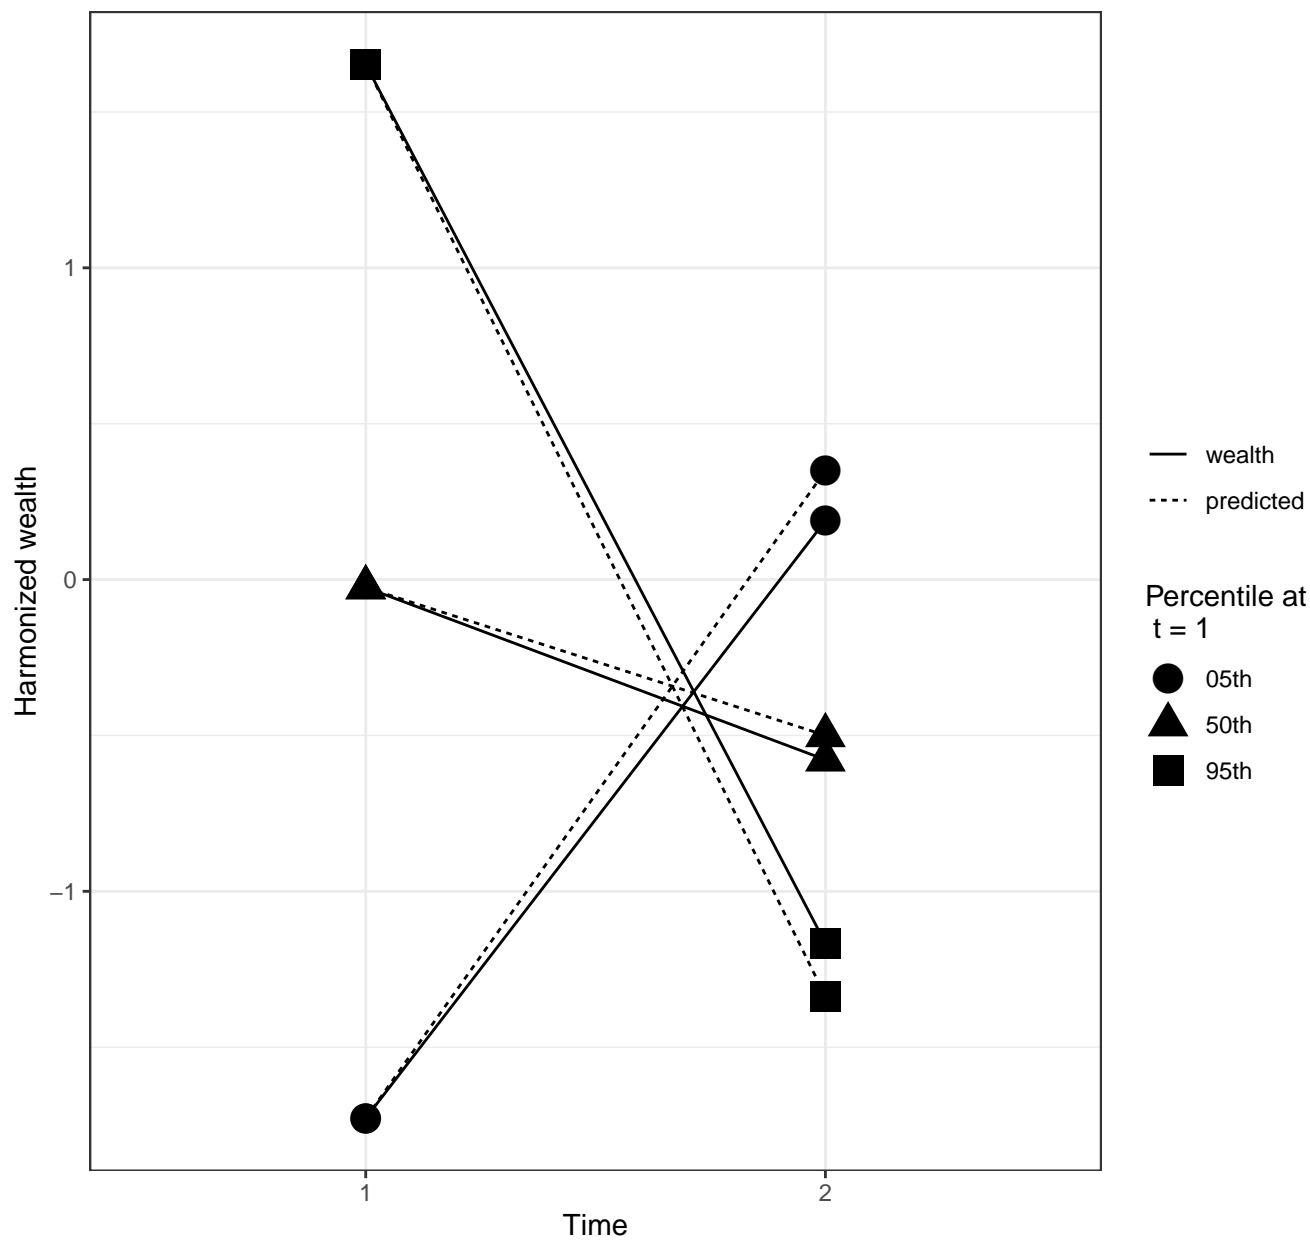

$w_2 = -0.3 + -0.5 \cdot w_1 + N(0, 0.2);$   
Variance at time 2: time 1 = 0.3

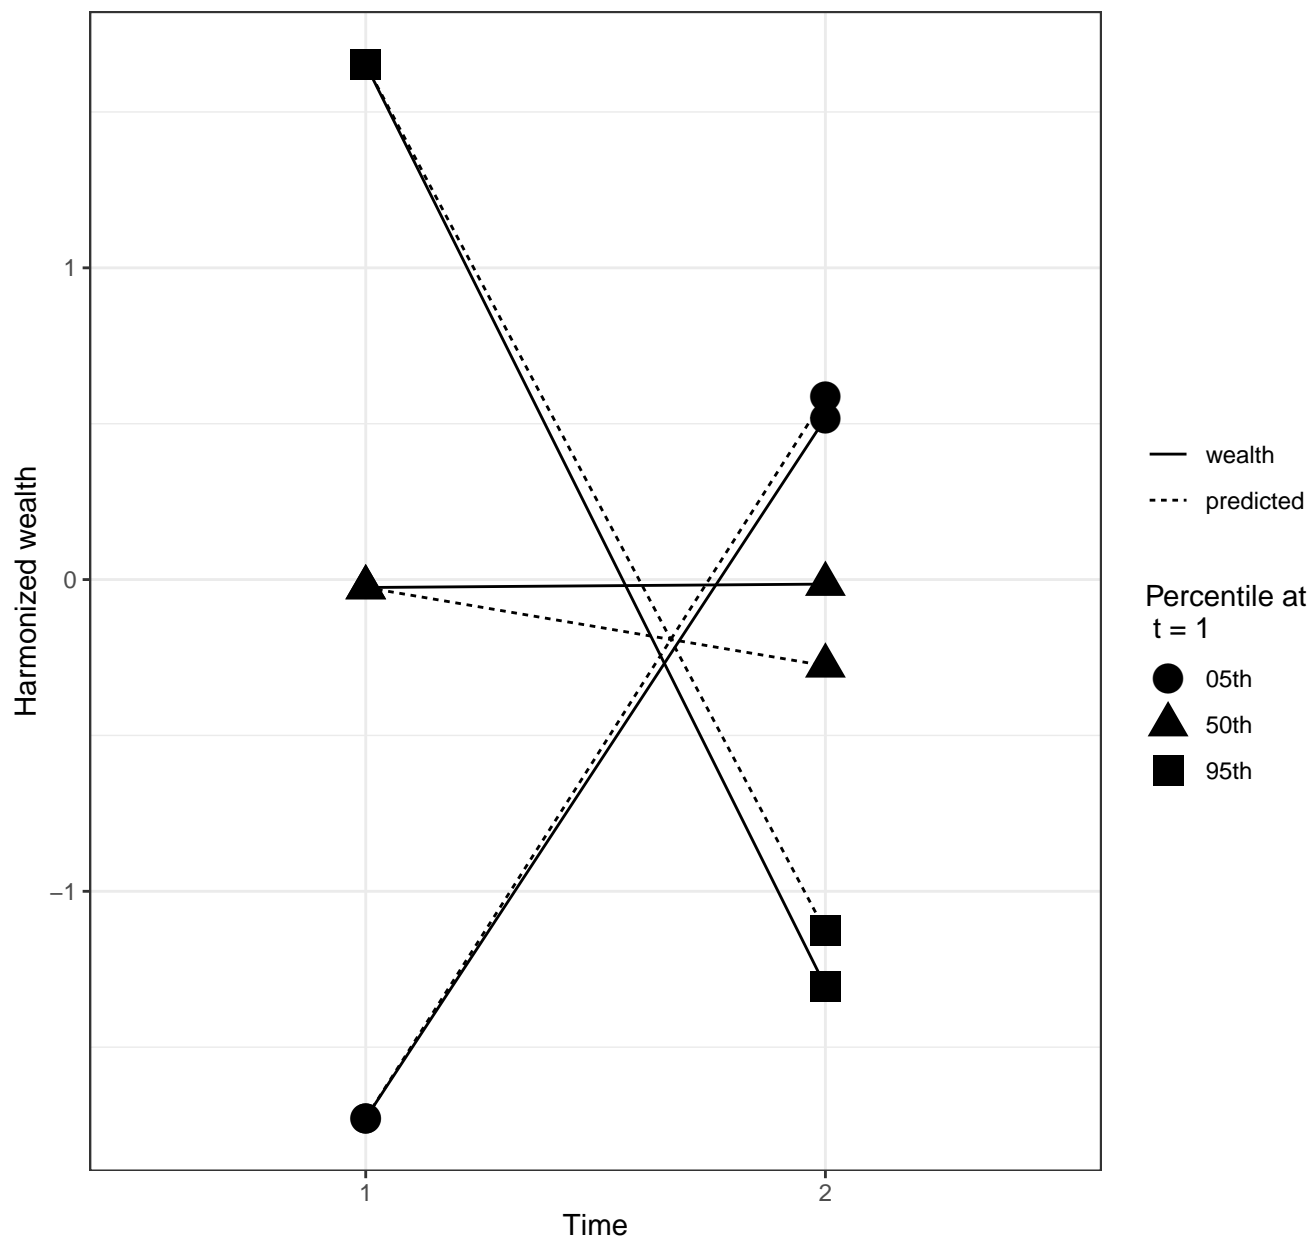

$w_2 = 0 + -0.5 * w_1 + N(0, 0.2);$   
Variance at time 2: time 1 = 0.3

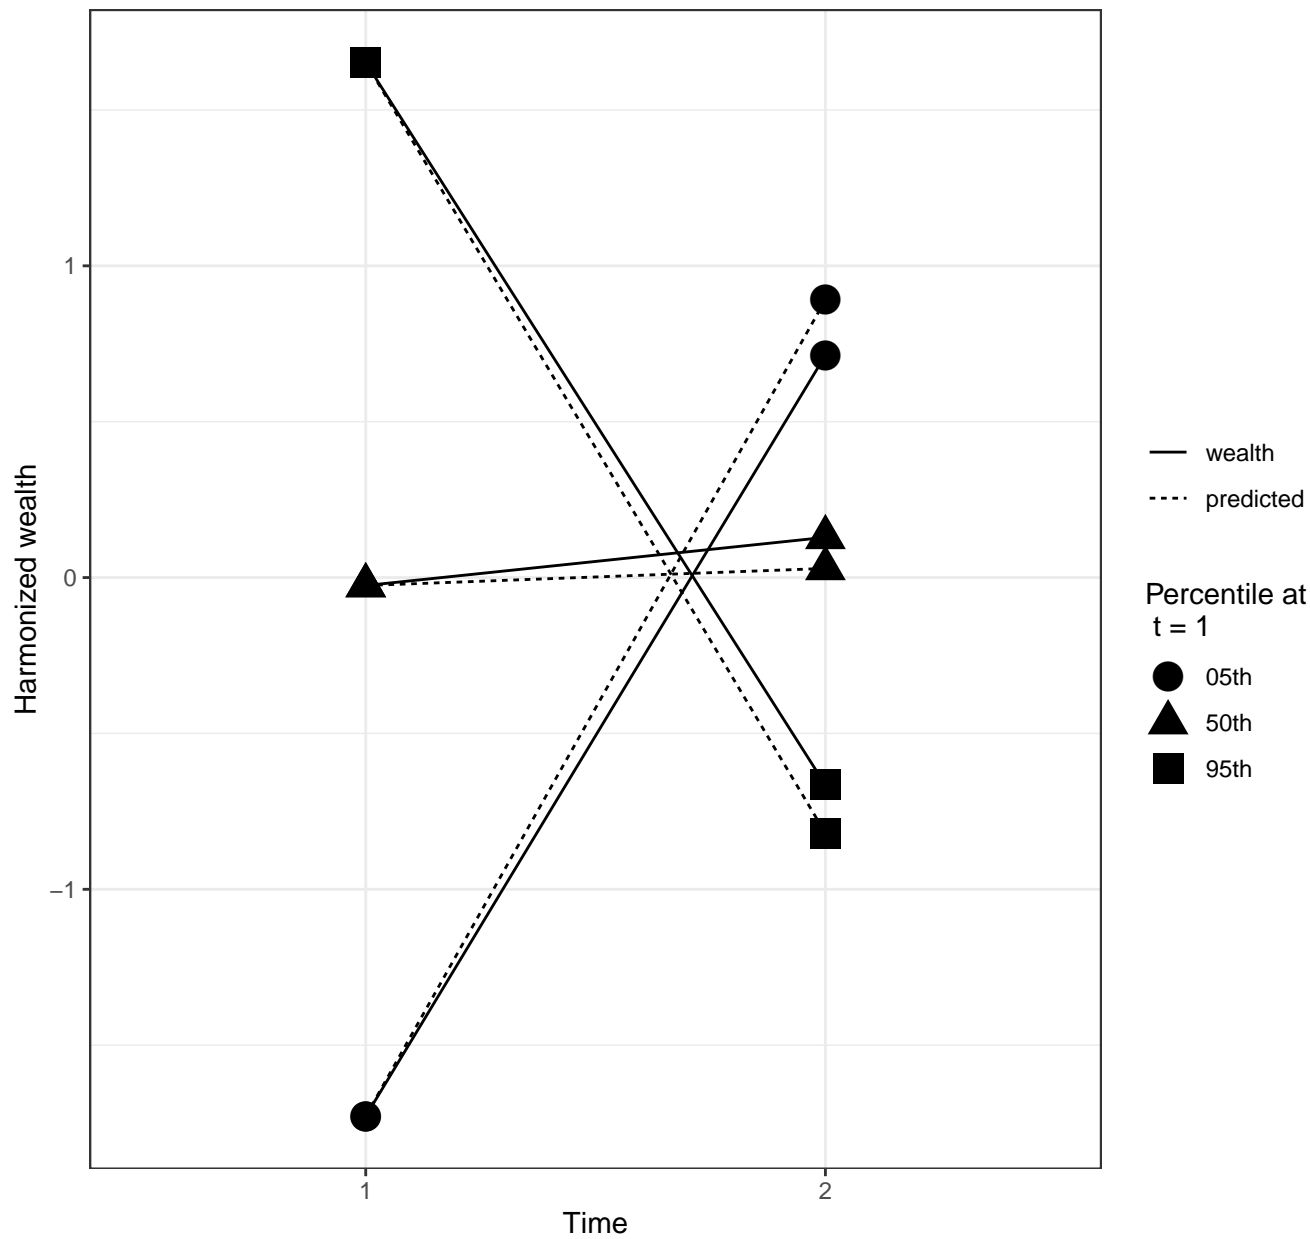

$w_2 = 0.3 + -0.5 * w_1 + N(0, 0.2);$   
Variance at time 2: time 1 = 0.3

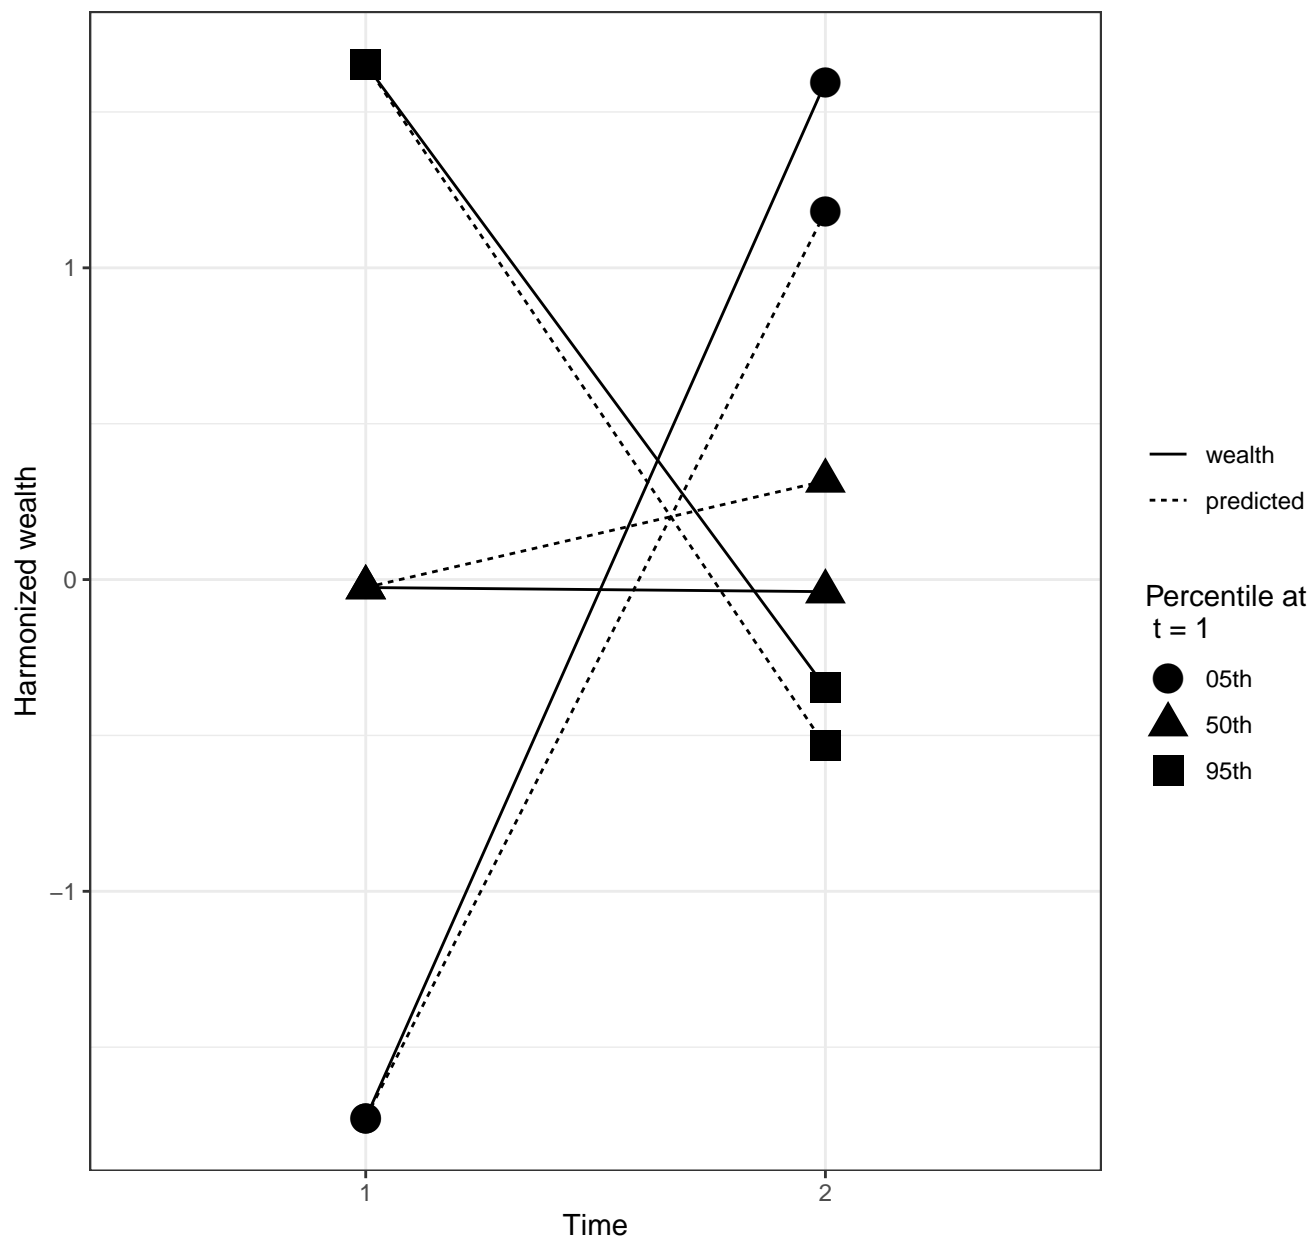

$w_2 = 0.5 + -0.5 * w_1 + N(0,0.2);$   
Variance at time 2: time 1 = 0.3

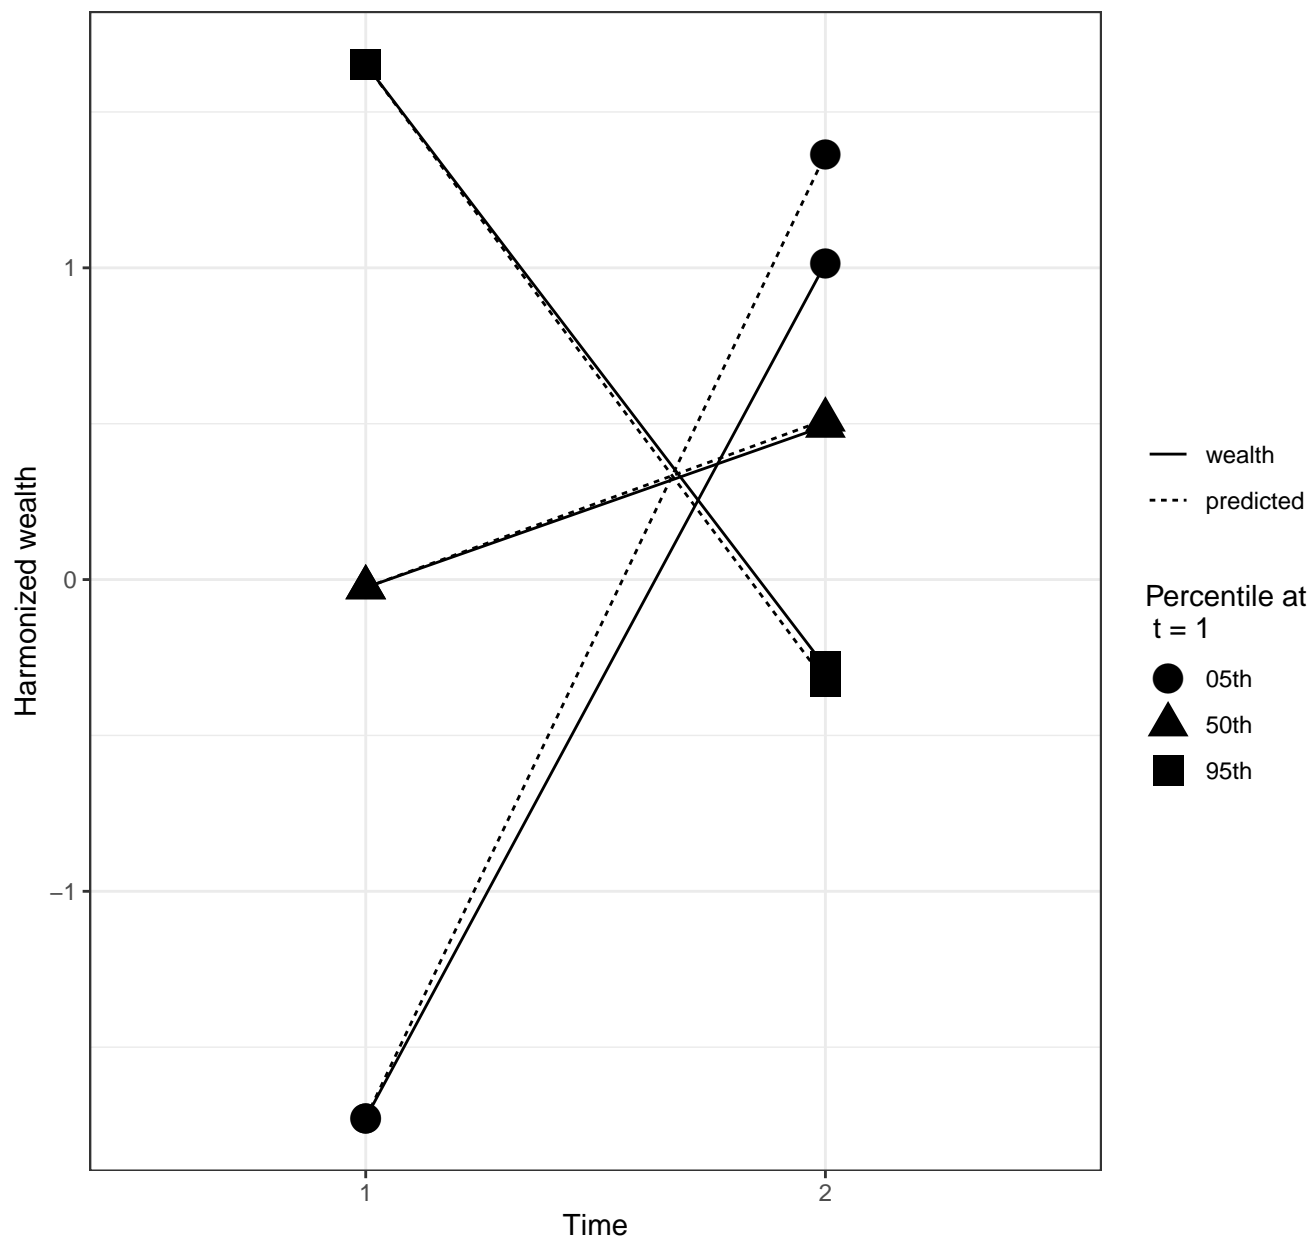

$w_2 = 1 + -0.5 * w_1 + N(0, 0.2);$   
Variance at time 2: time 1 = 0.3

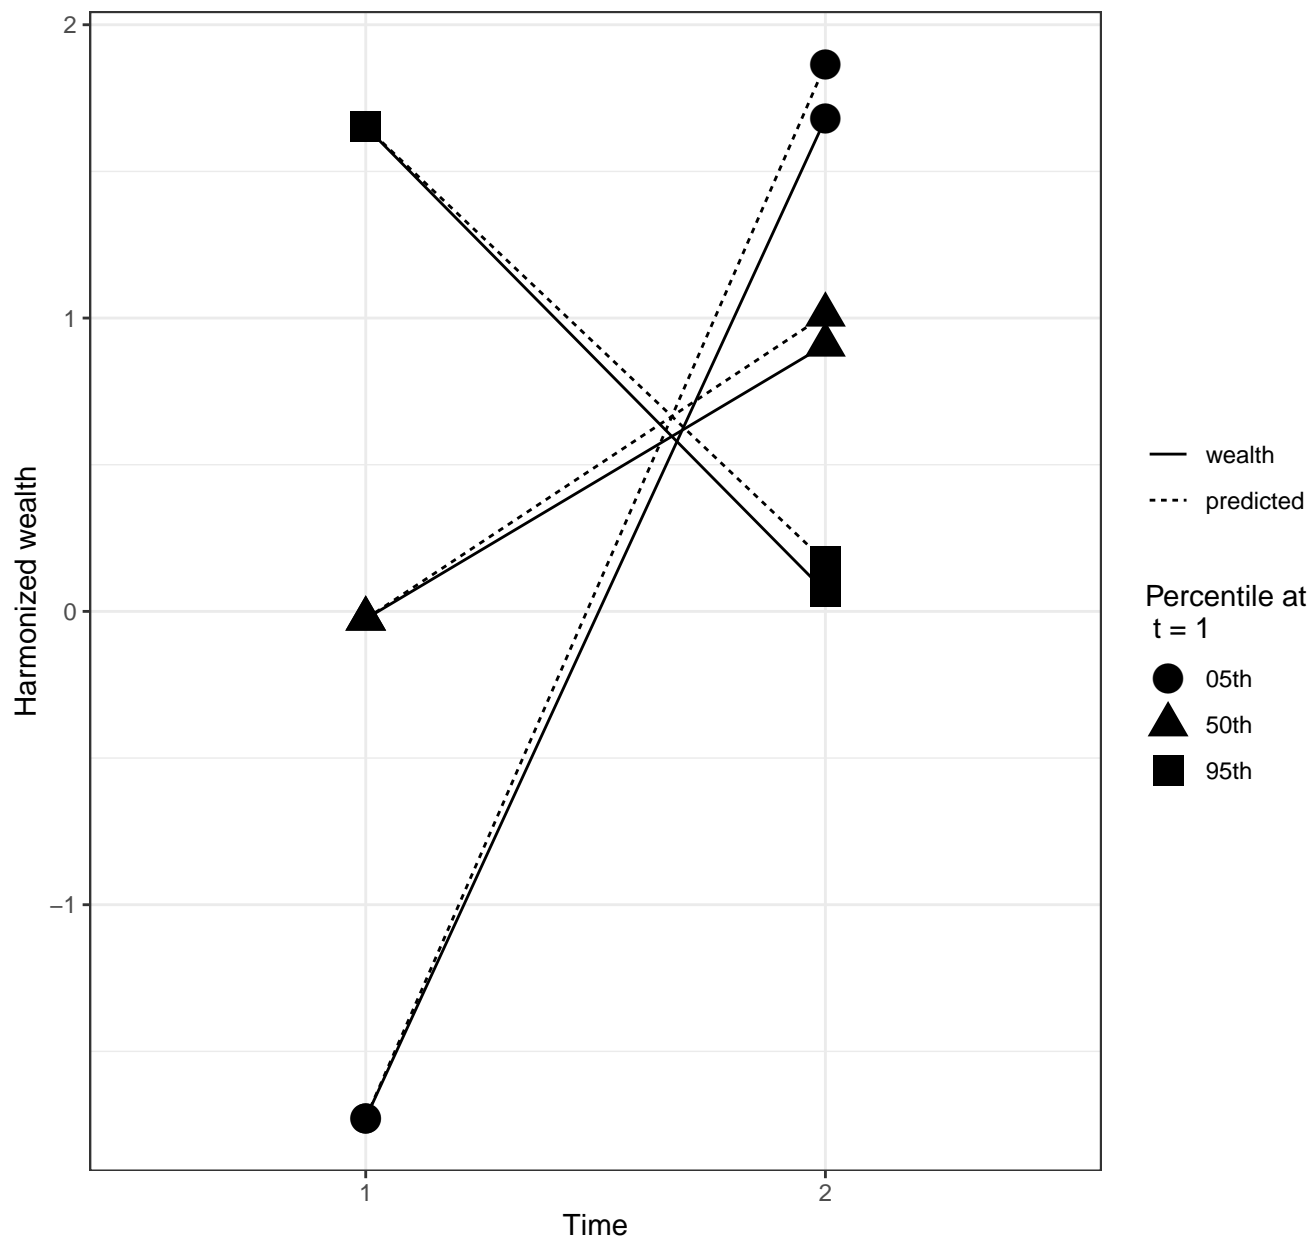

$w_2 = -1 + 0 \cdot w_1 + N(0, 0.2);$   
Variance at time 2: time 1 = 0

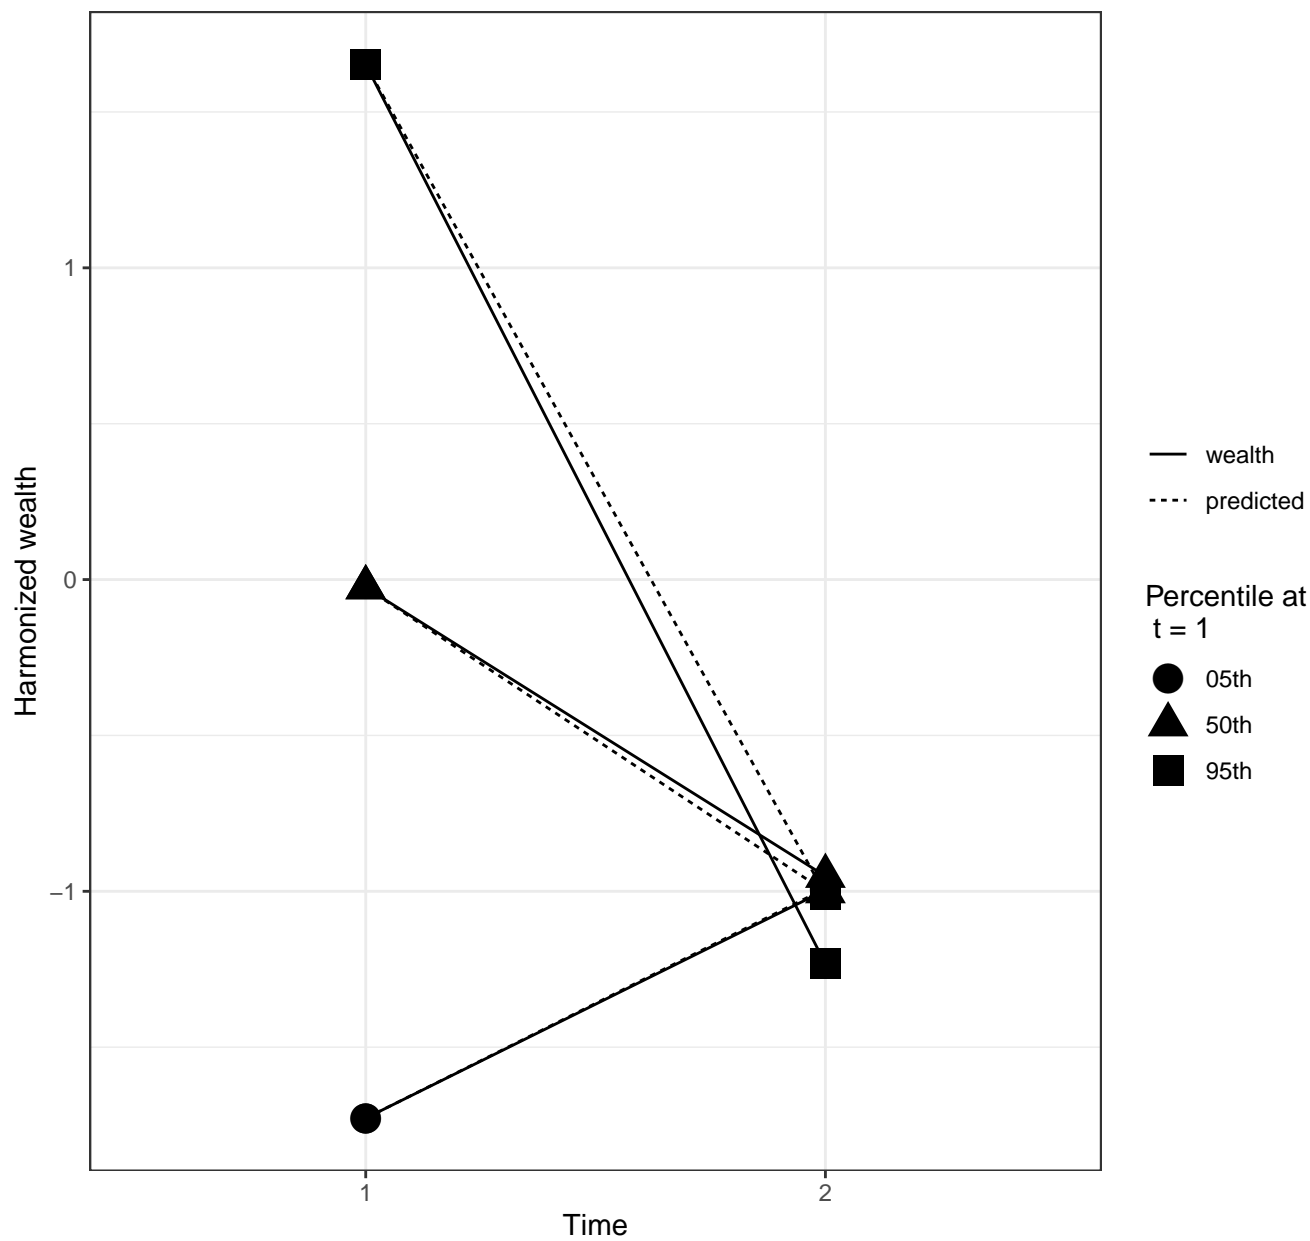

$w_2 = -0.5 + 0 \cdot w_1 + N(0, 0.2);$   
Variance at time 2: time 1 = 0

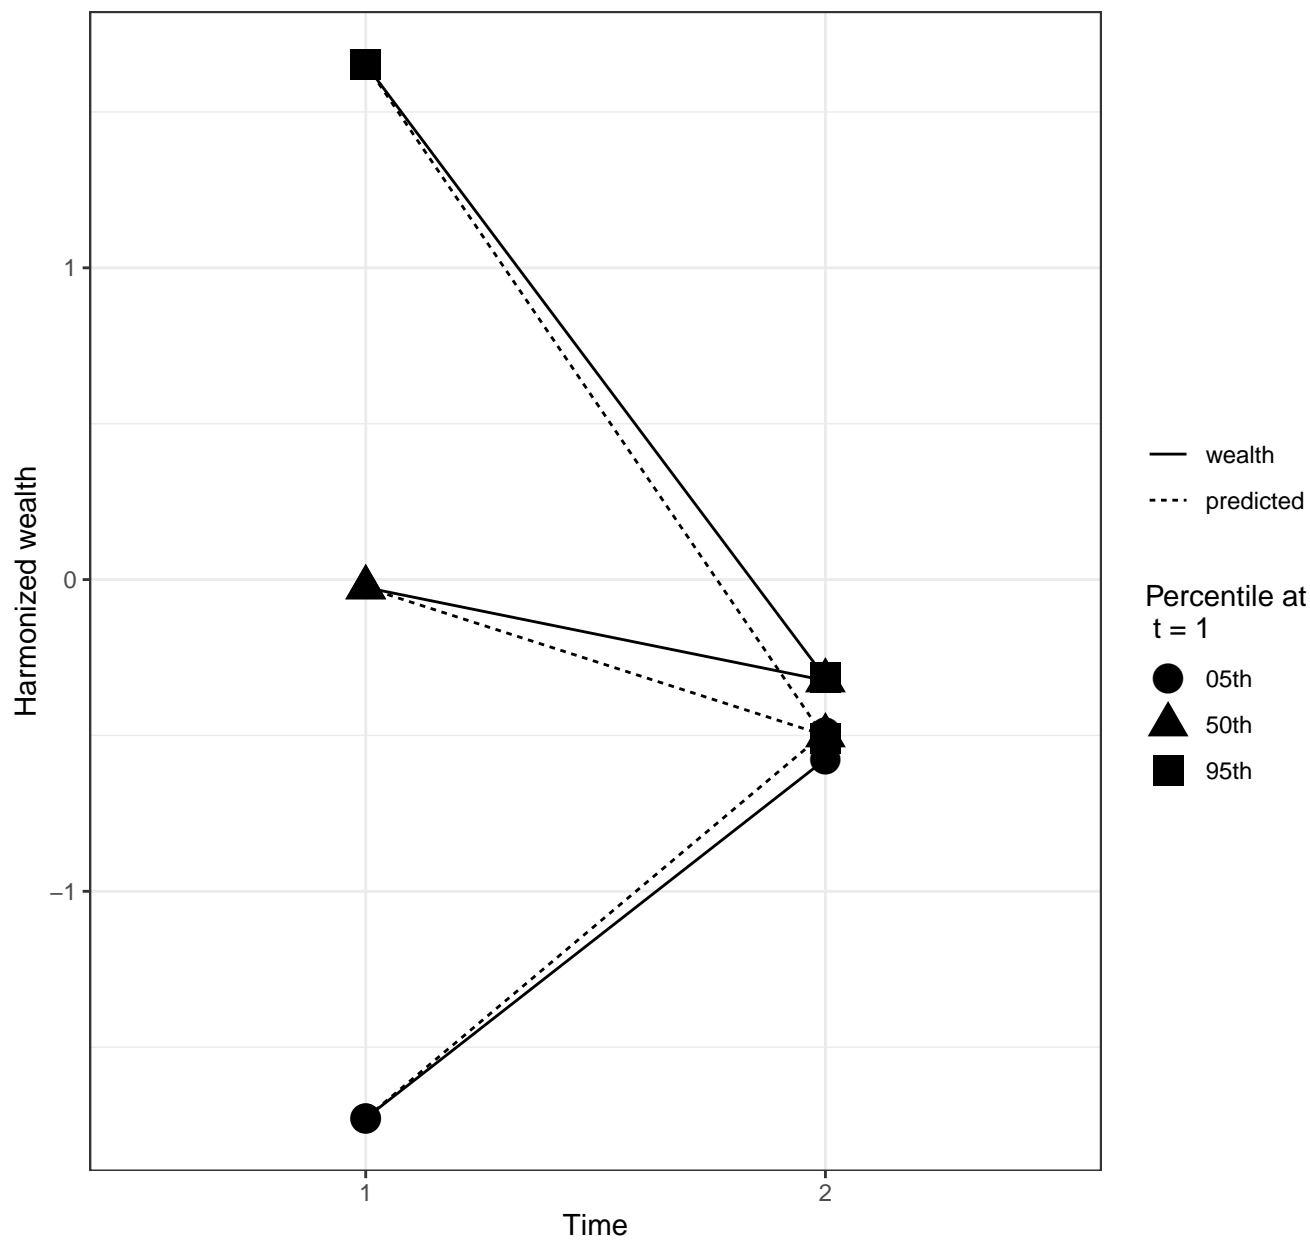



$w_2 = -0.3 + 0 \cdot w_1 + N(0, 0.2);$   
Variance at time 2: time 1 = 0

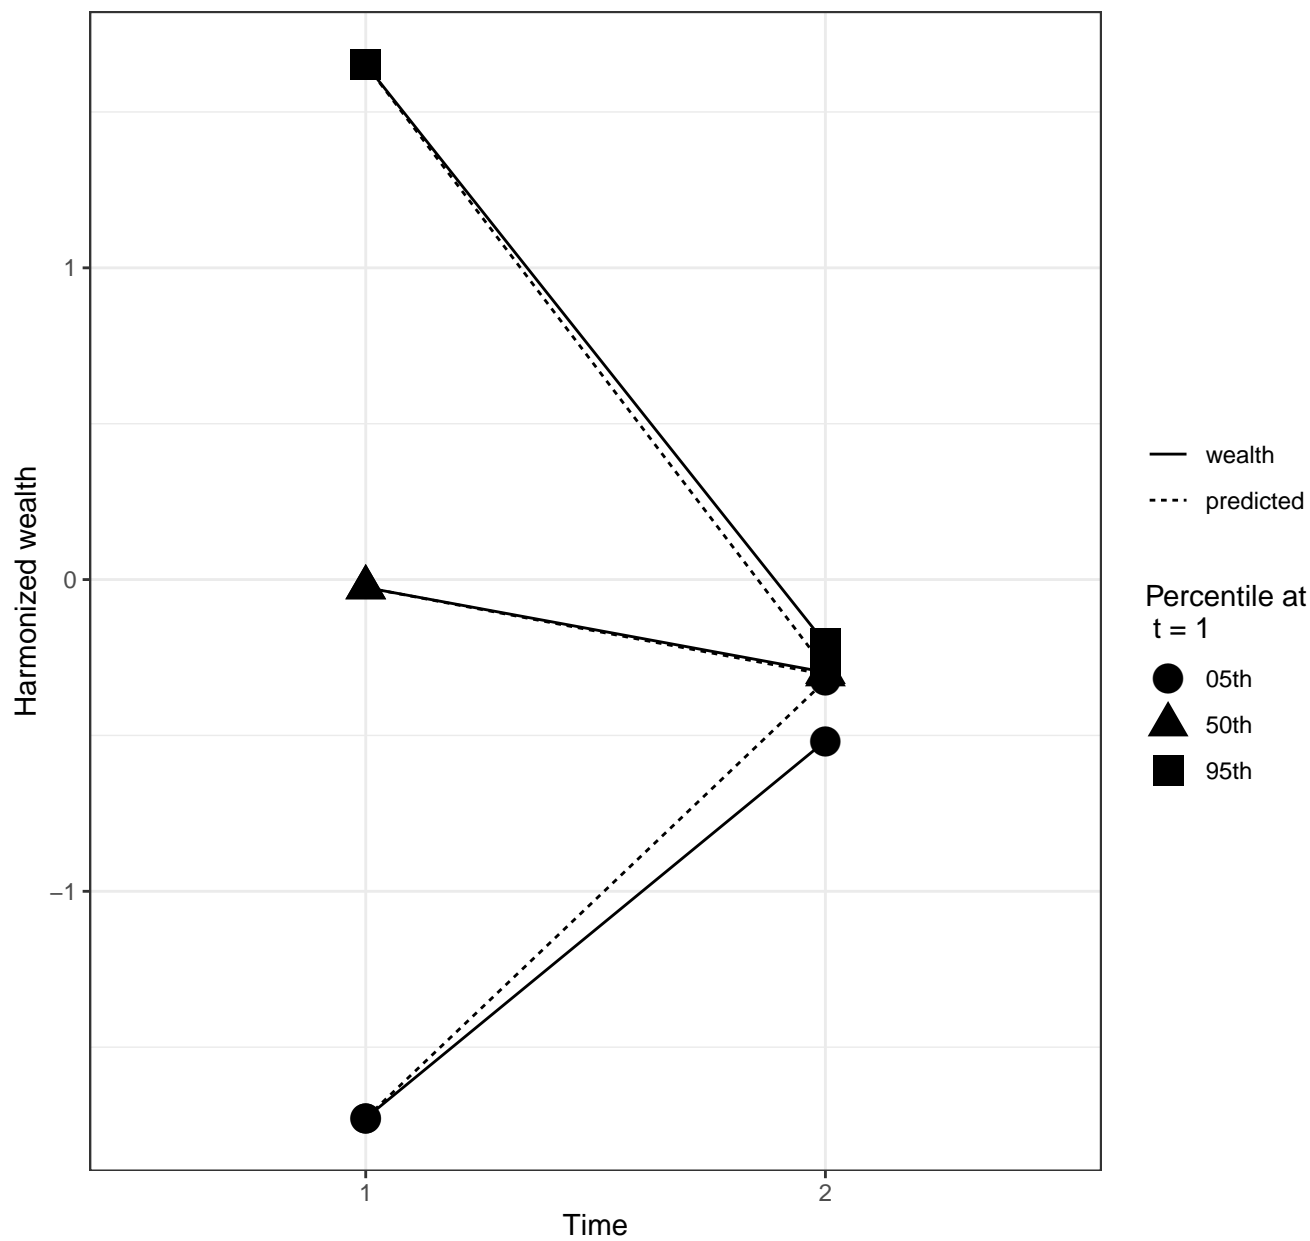

$w_2 = 0 + 0 \cdot w_1 + N(0, 0.2);$   
Variance at time 2: time 1 = 0

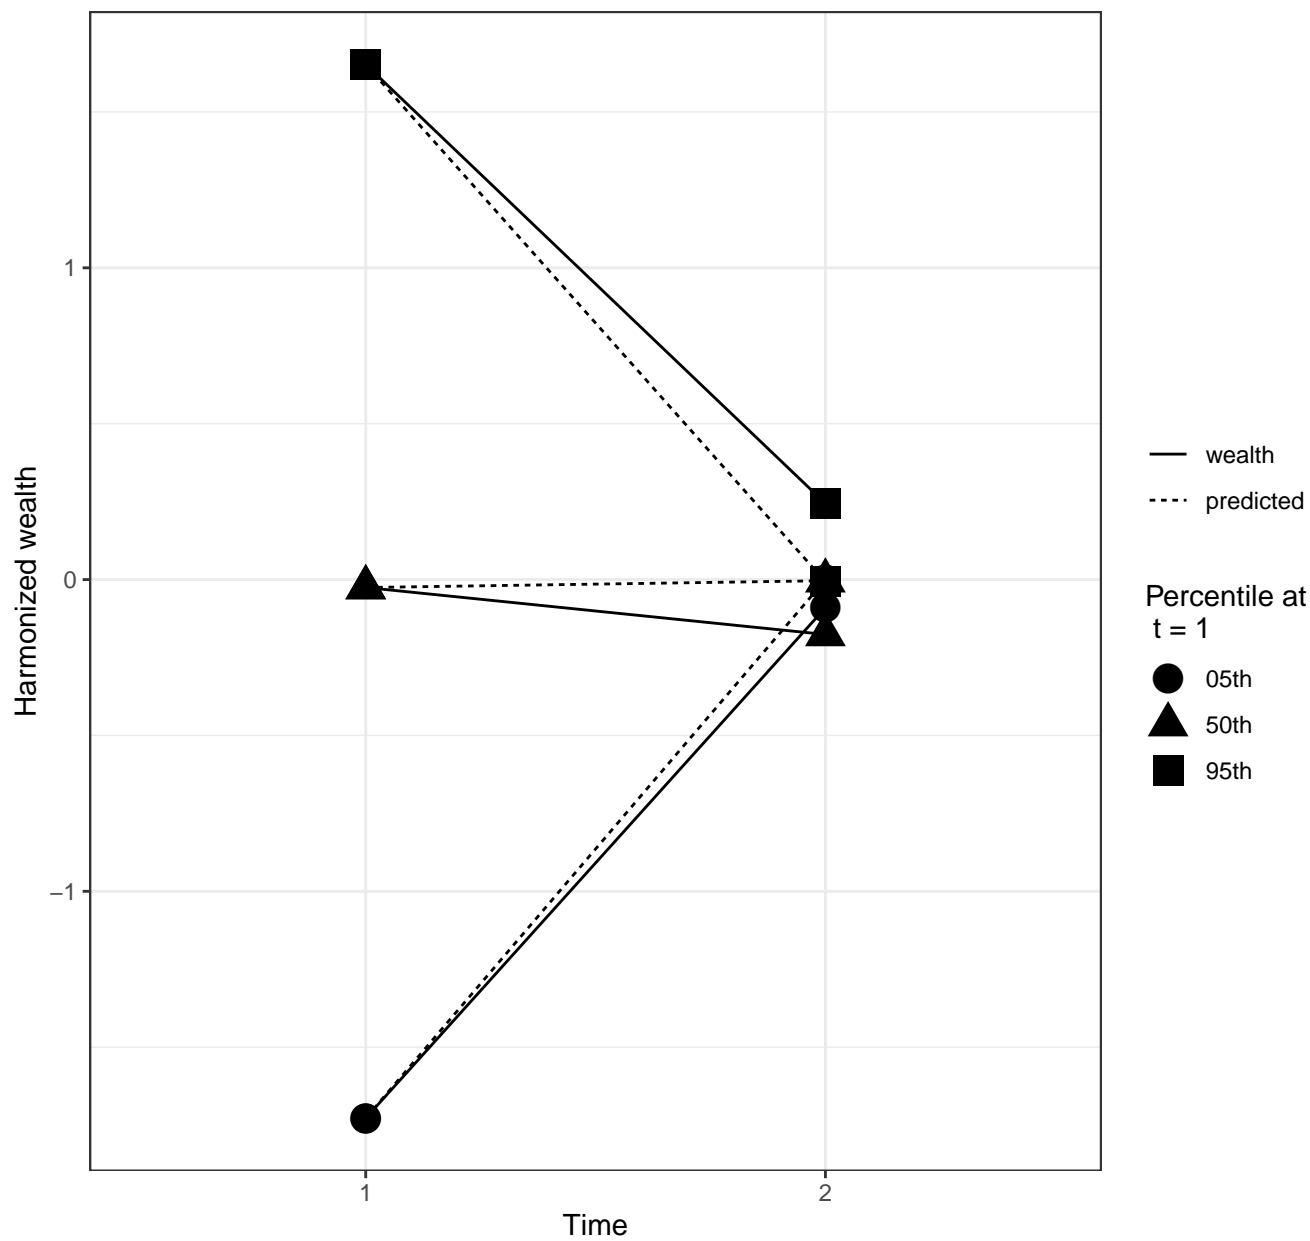

$w_2 = 0.3 + 0 \cdot w_1 + N(0, 0.2);$   
Variance at time 2: time 1 = 0

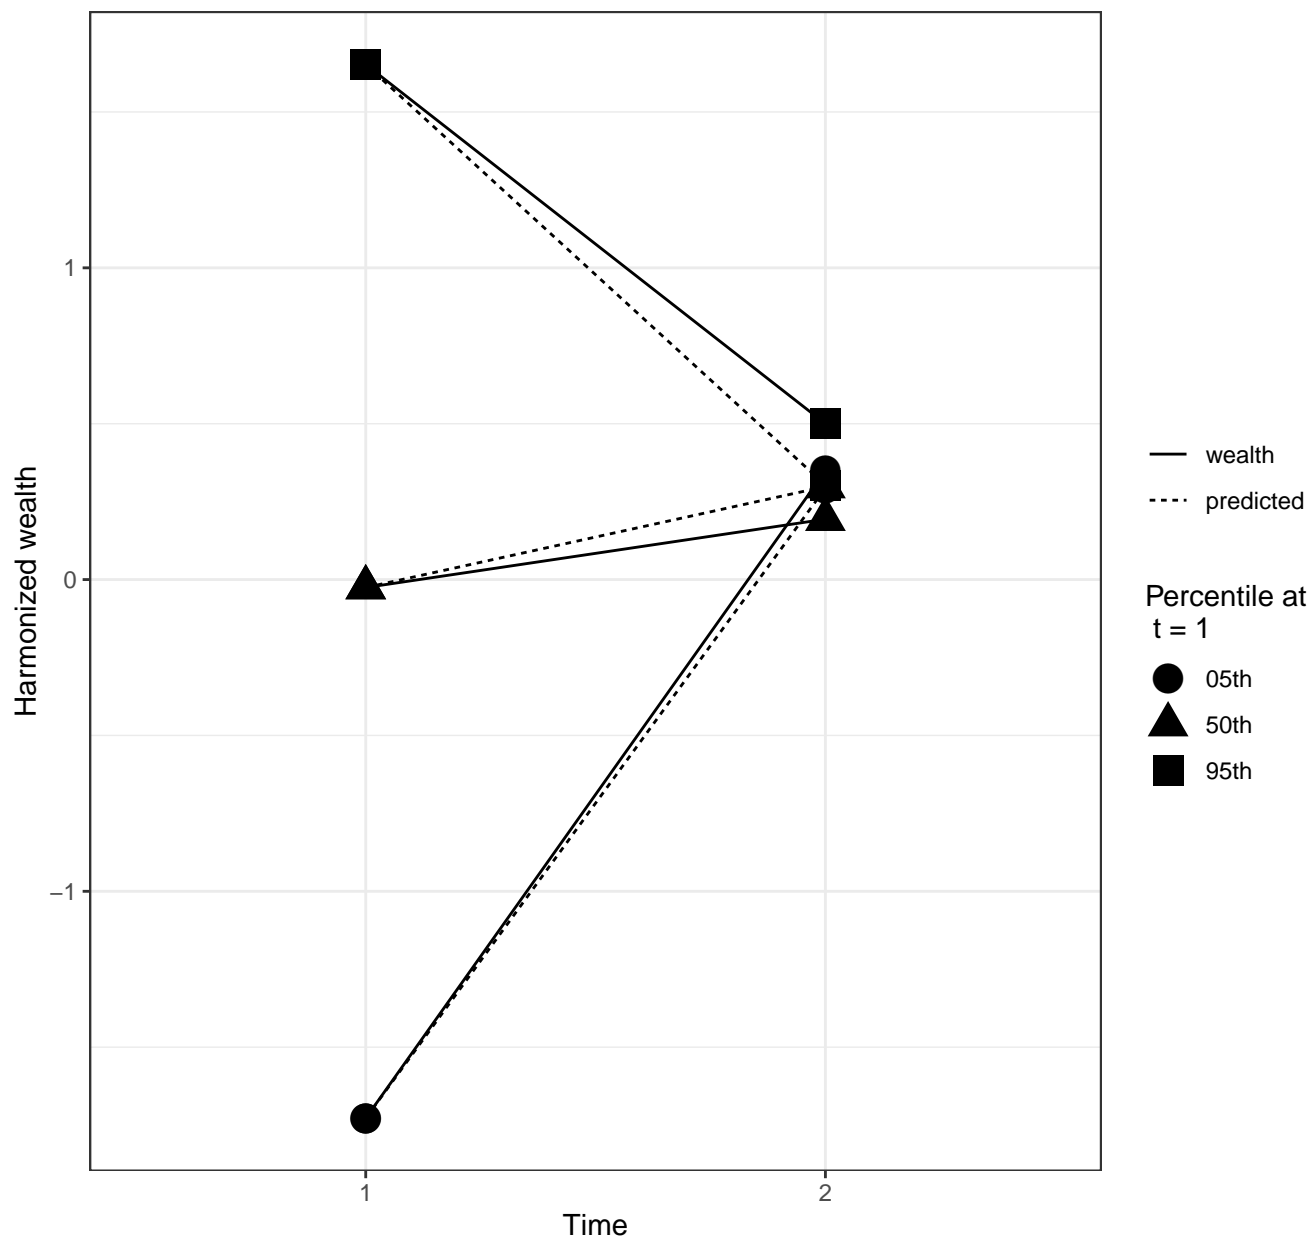

$w_2 = 0.5 + 0 \cdot w_1 + N(0, 0.2);$   
Variance at time 2: time 1 = 0

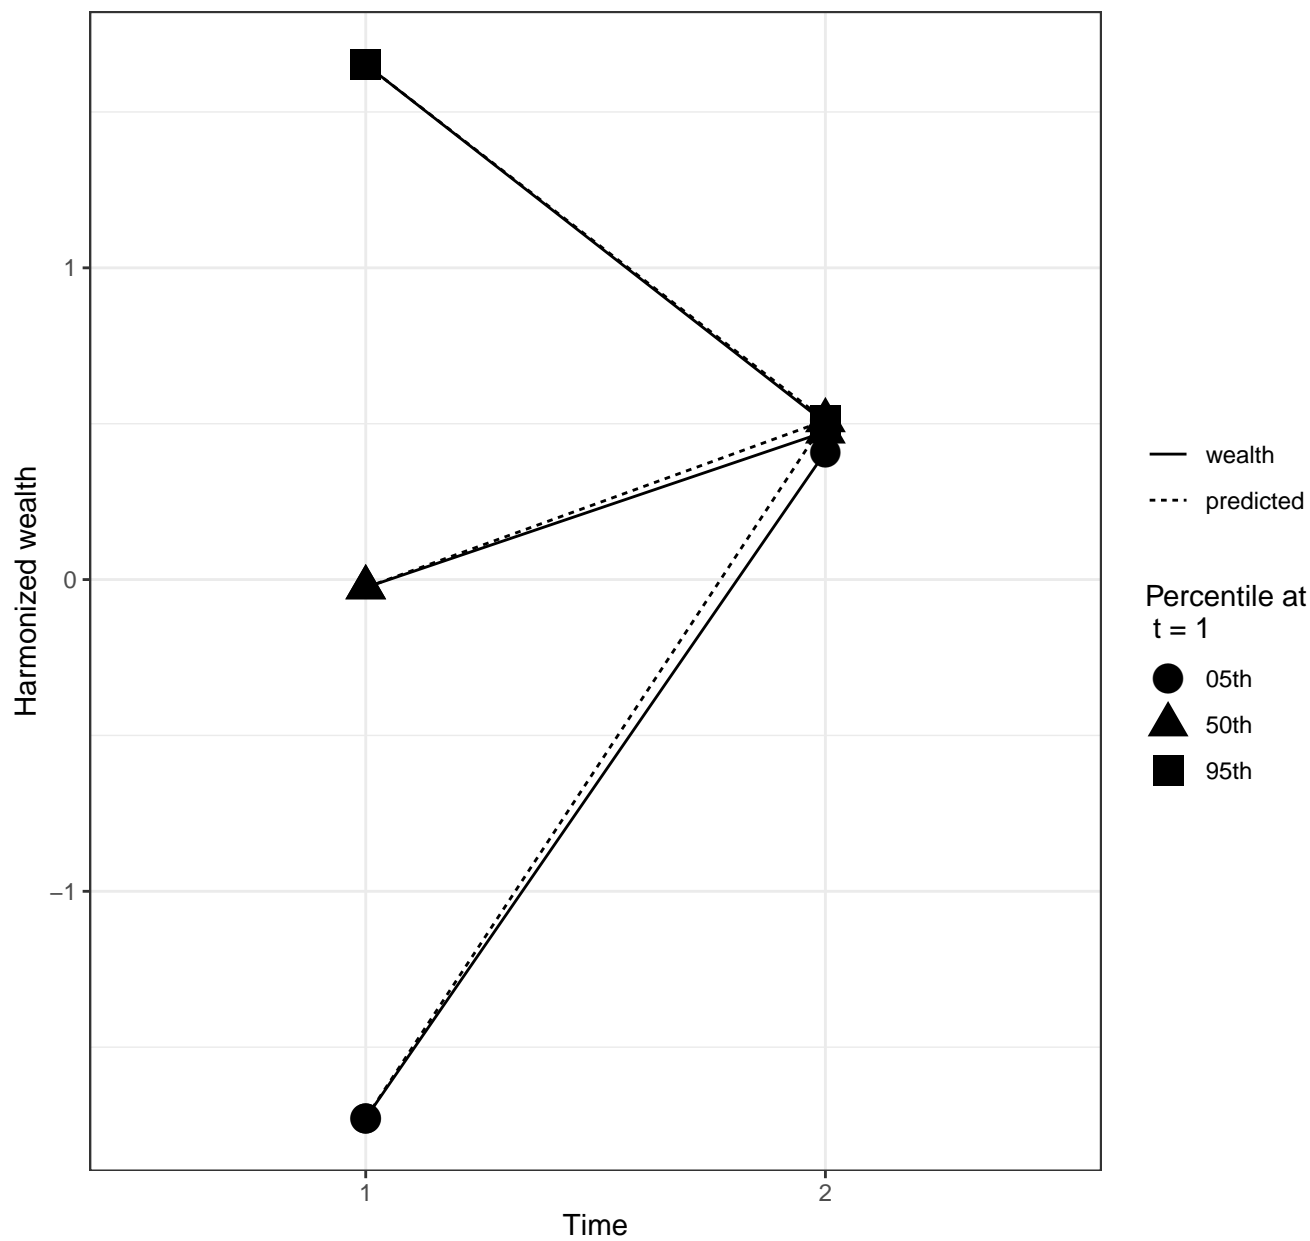

$w_2 = 1 + 0 \cdot w_1 + N(0, 0.2);$   
Variance at time 2: time 1 = 0

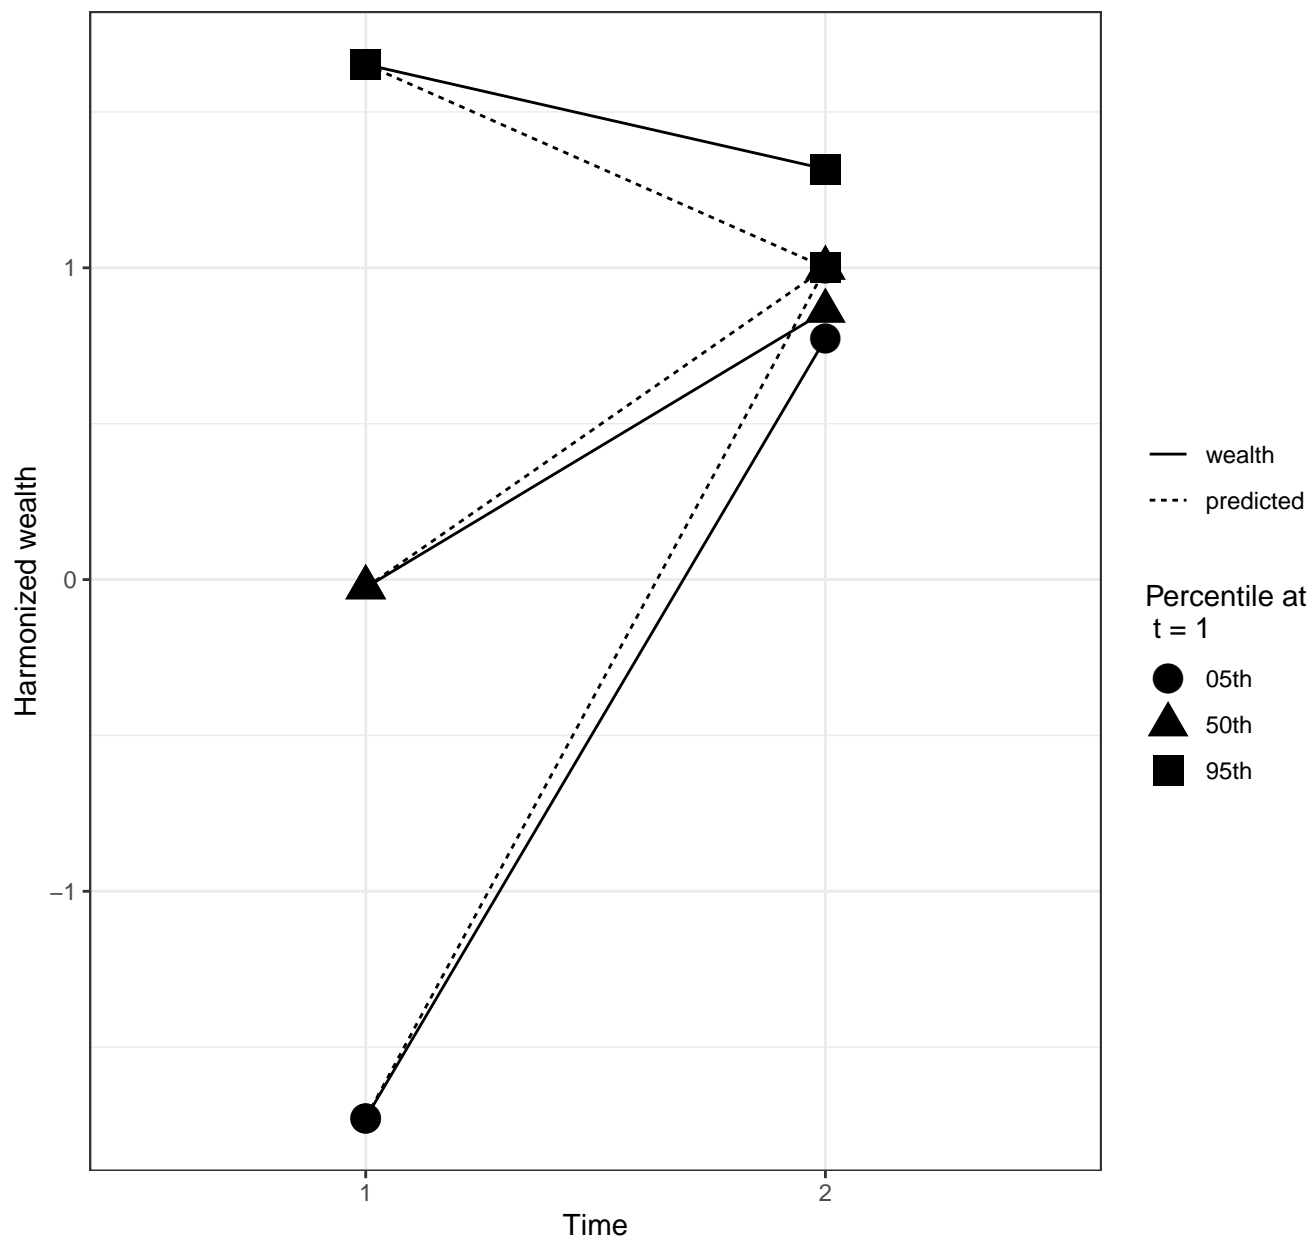

$w_2 = -1 + 0.5 \cdot w_1 + N(0, 0.2);$   
Variance at time 2: time 1 = 0.3

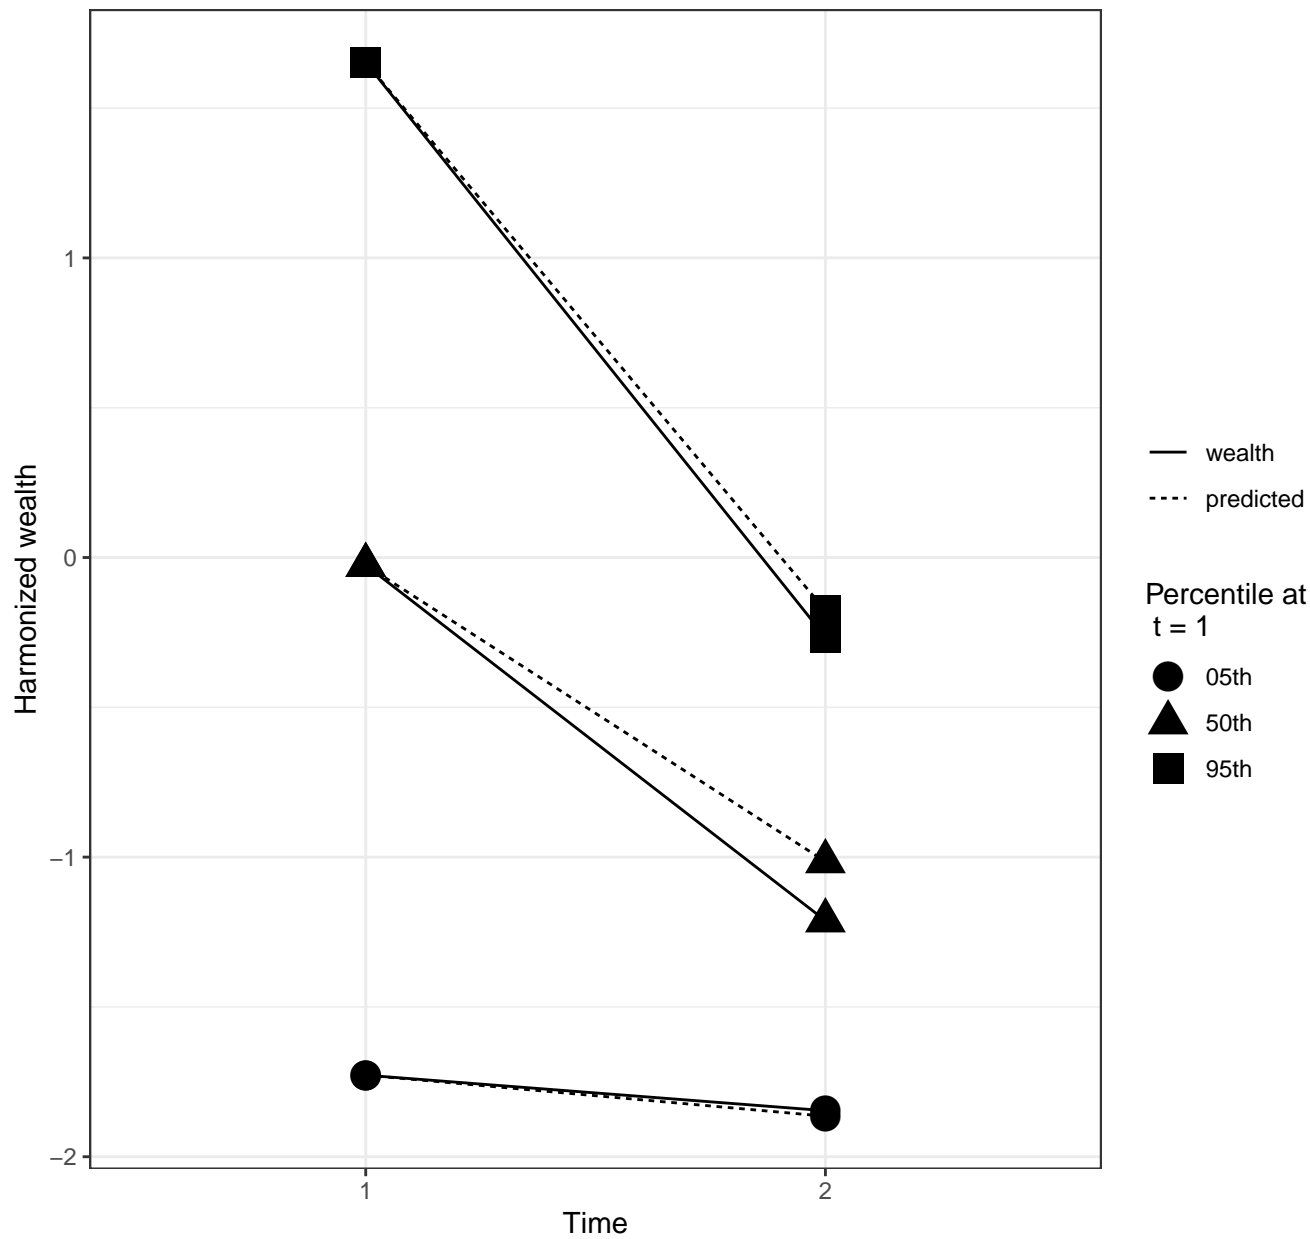

$w_2 = -0.5 + 0.5 \cdot w_1 + N(0, 0.2);$   
Variance at time 2: time 1 = 0.3

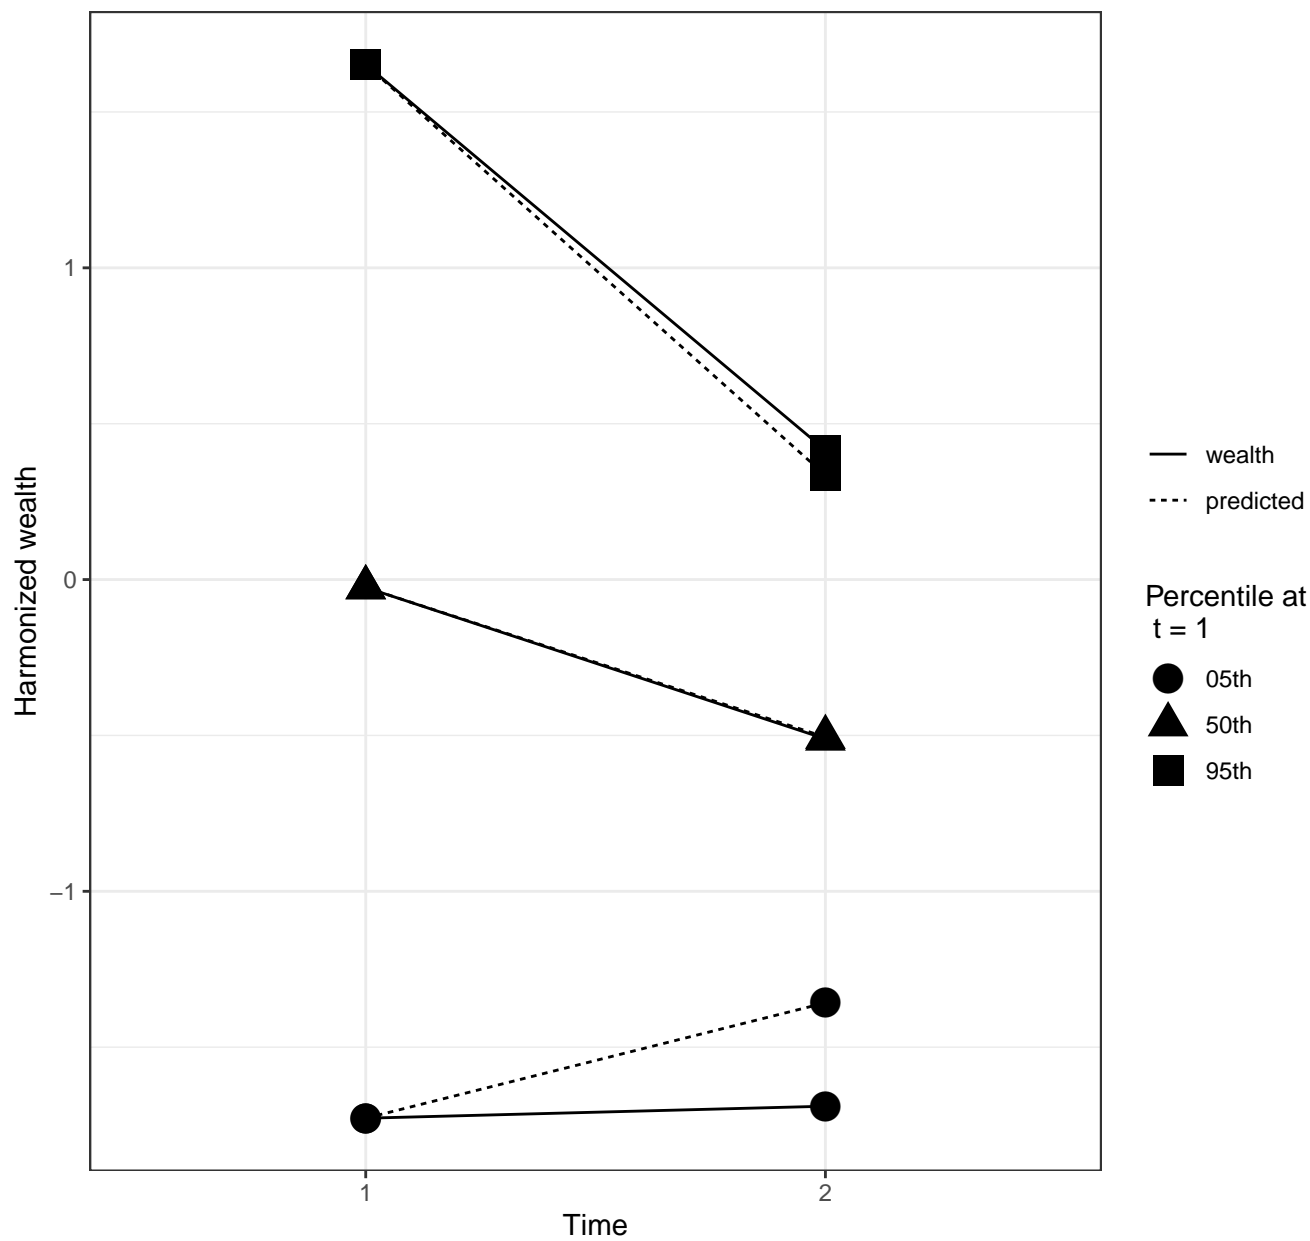

$w_2 = -0.3 + 0.5 \cdot w_1 + N(0, 0.2);$   
Variance at time 2: time 1 = 0.3

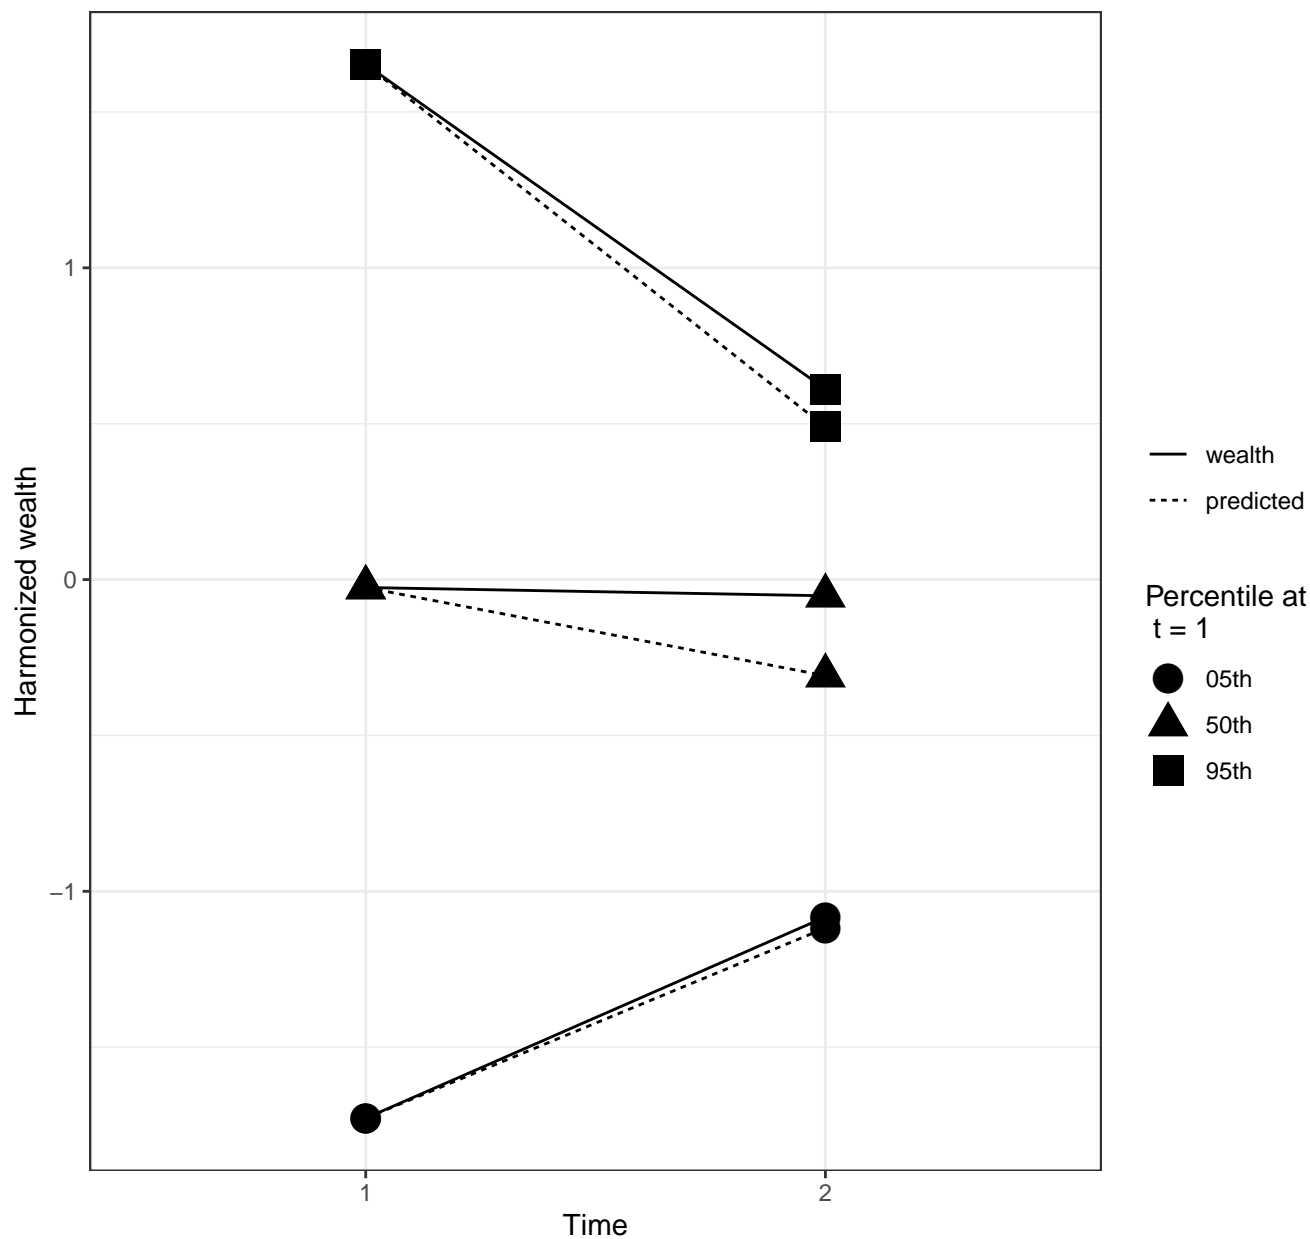



$w_2 = 0 + 0.5 \cdot w_1 + N(0, 0.2);$   
Variance at time 2: time 1 = 0.3

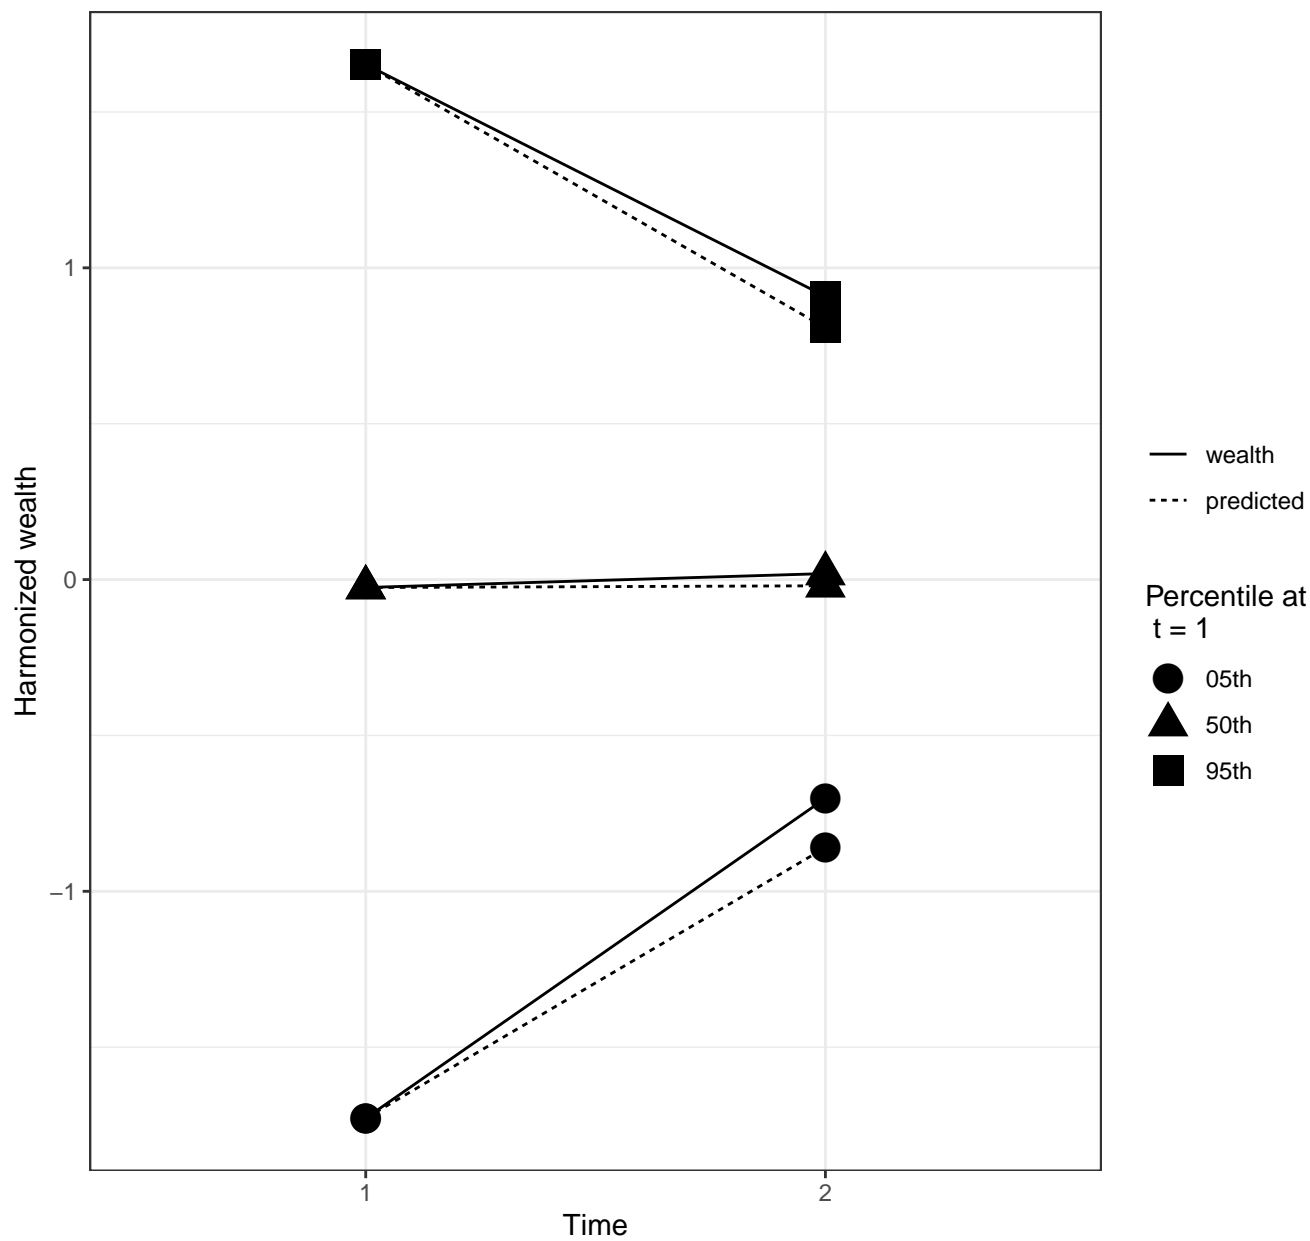

$w_2 = 0.3 + 0.5 \cdot w_1 + N(0, 0.2);$   
Variance at time 2: time 1 = 0.3

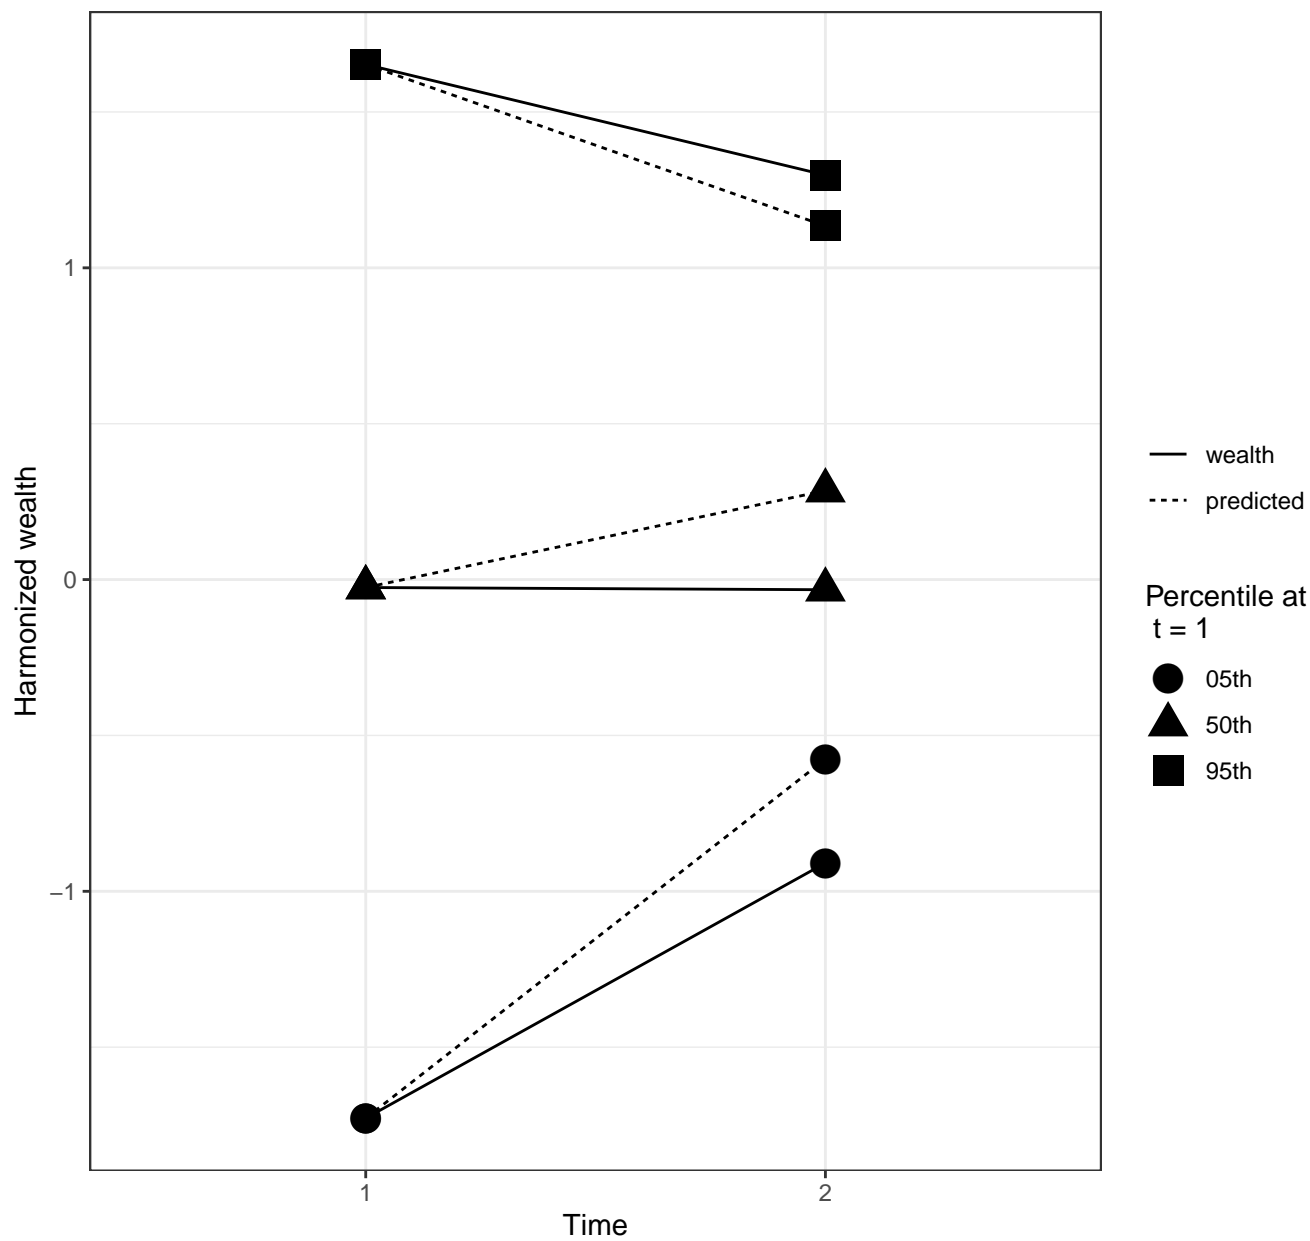

$w_2 = 0.5 + 0.5 \cdot w_1 + N(0, 0.2);$   
Variance at time 2: time 1 = 0.3

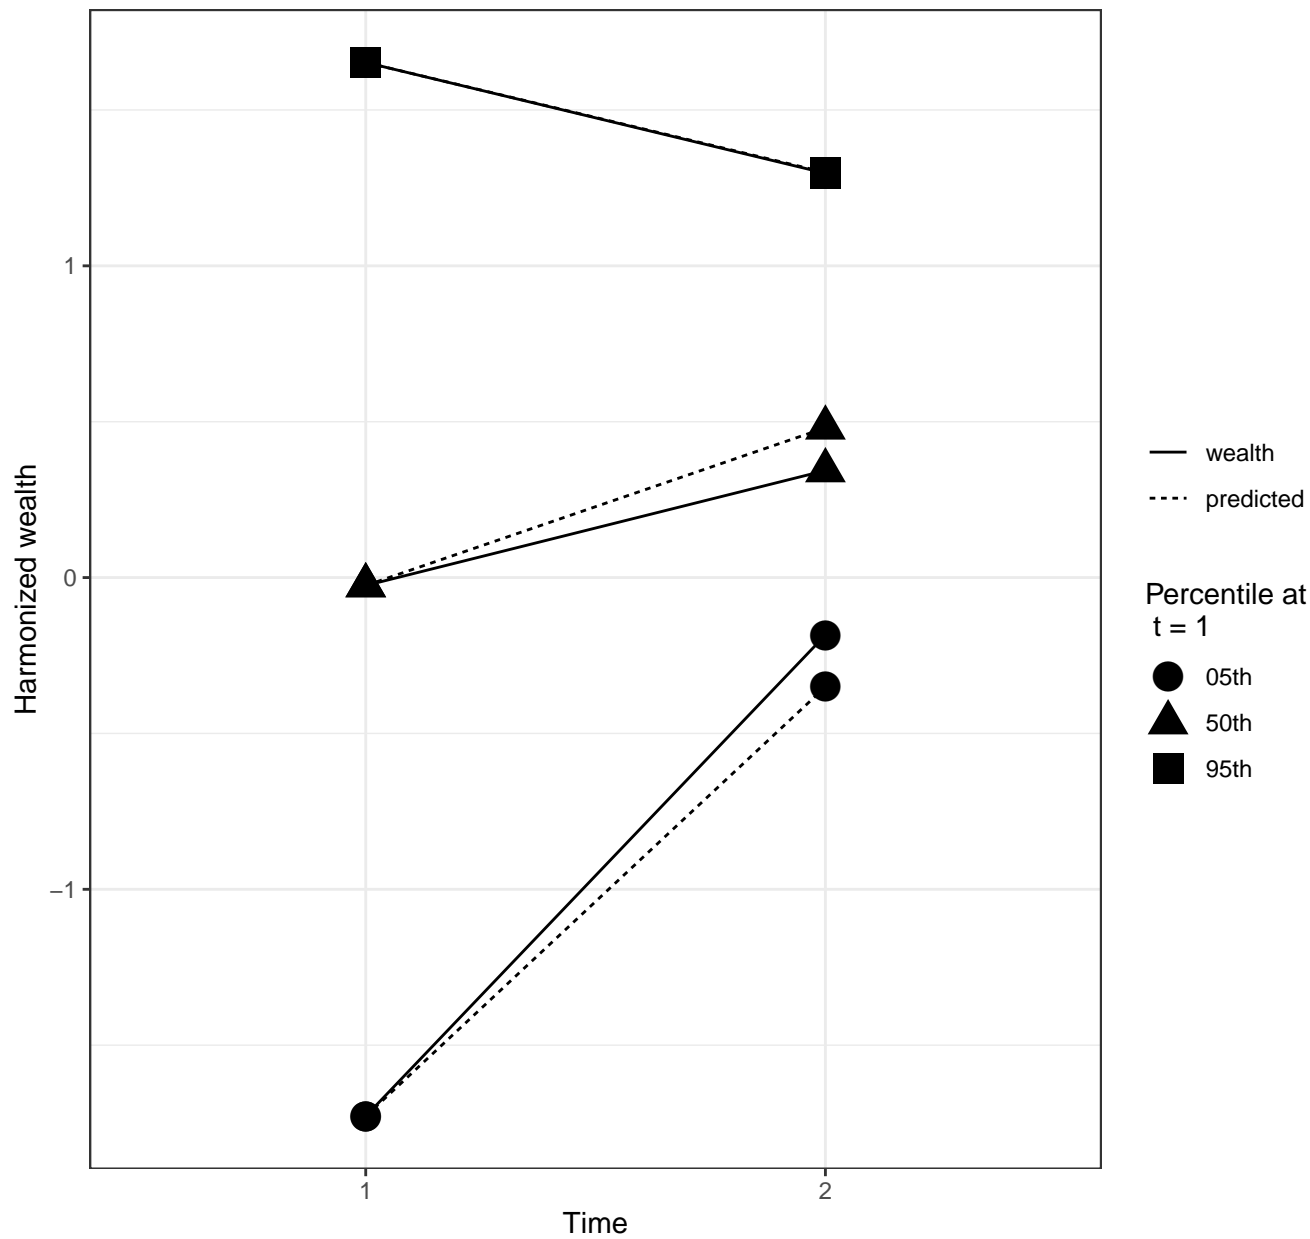

$w_2 = 1 + 0.5 \cdot w_1 + N(0, 0.2);$   
Variance at time 2: time 1 = 0.3

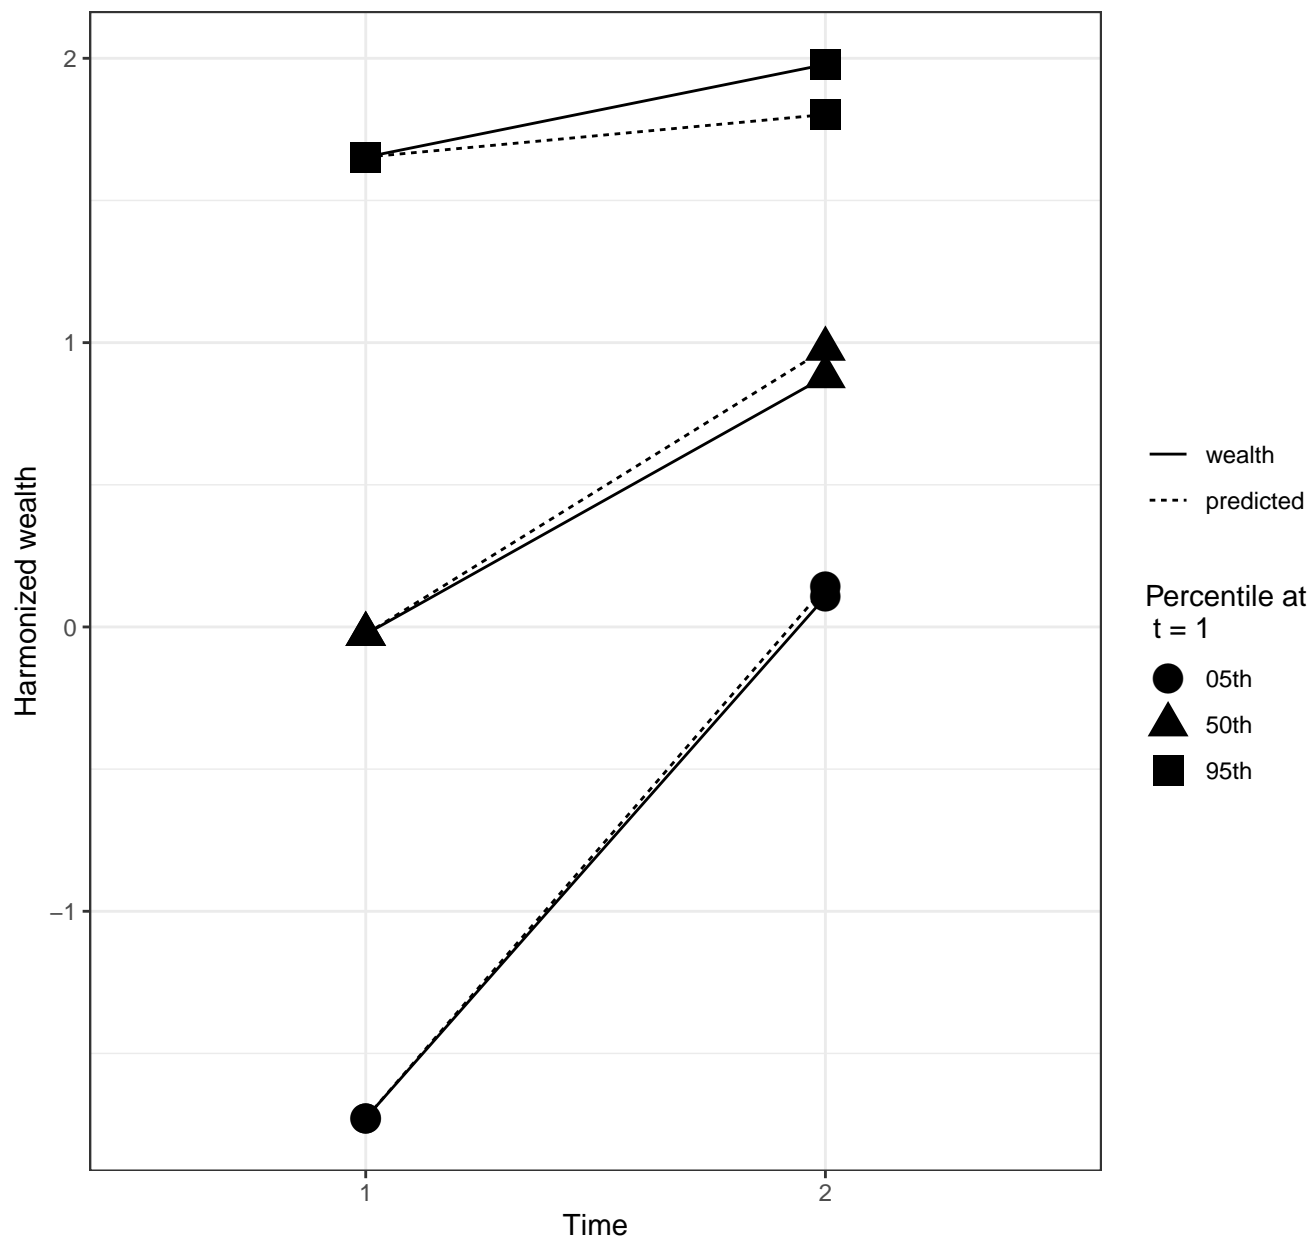

$w_2 = -1 + 1 \cdot w_1 + N(0, 0.2);$   
Variance at time 2: time 1 = 1.1

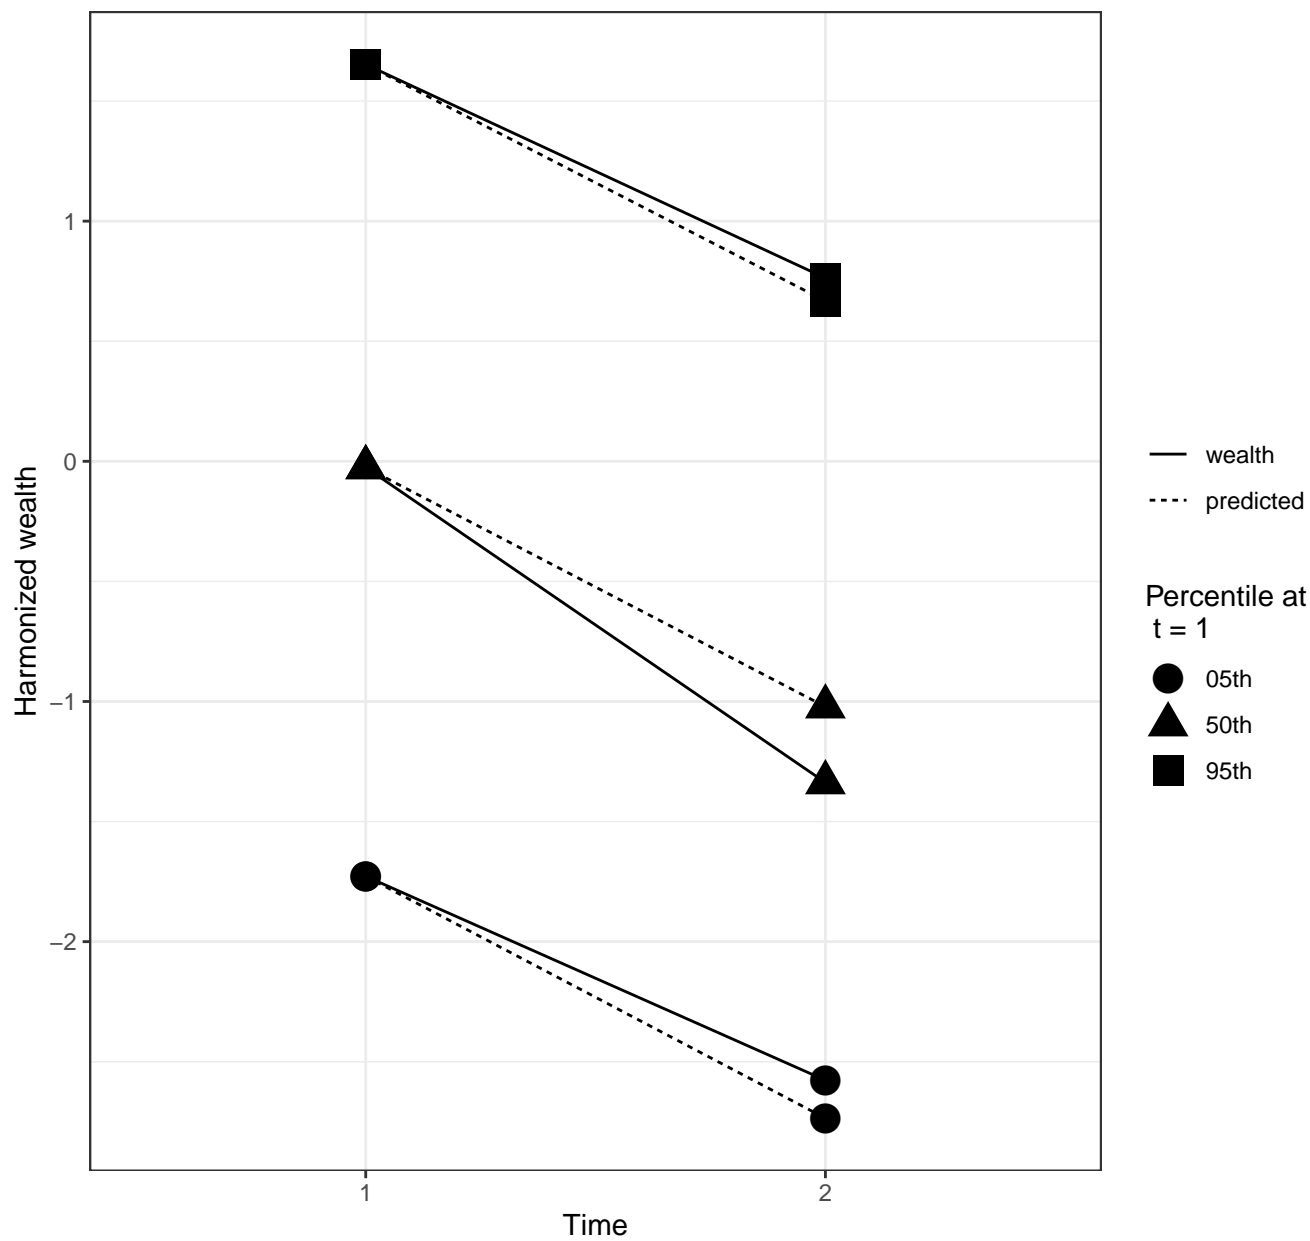

$w_2 = -0.5 + 1 \cdot w_1 + N(0, 0.2);$   
Variance at time 2: time 1 = 1.1

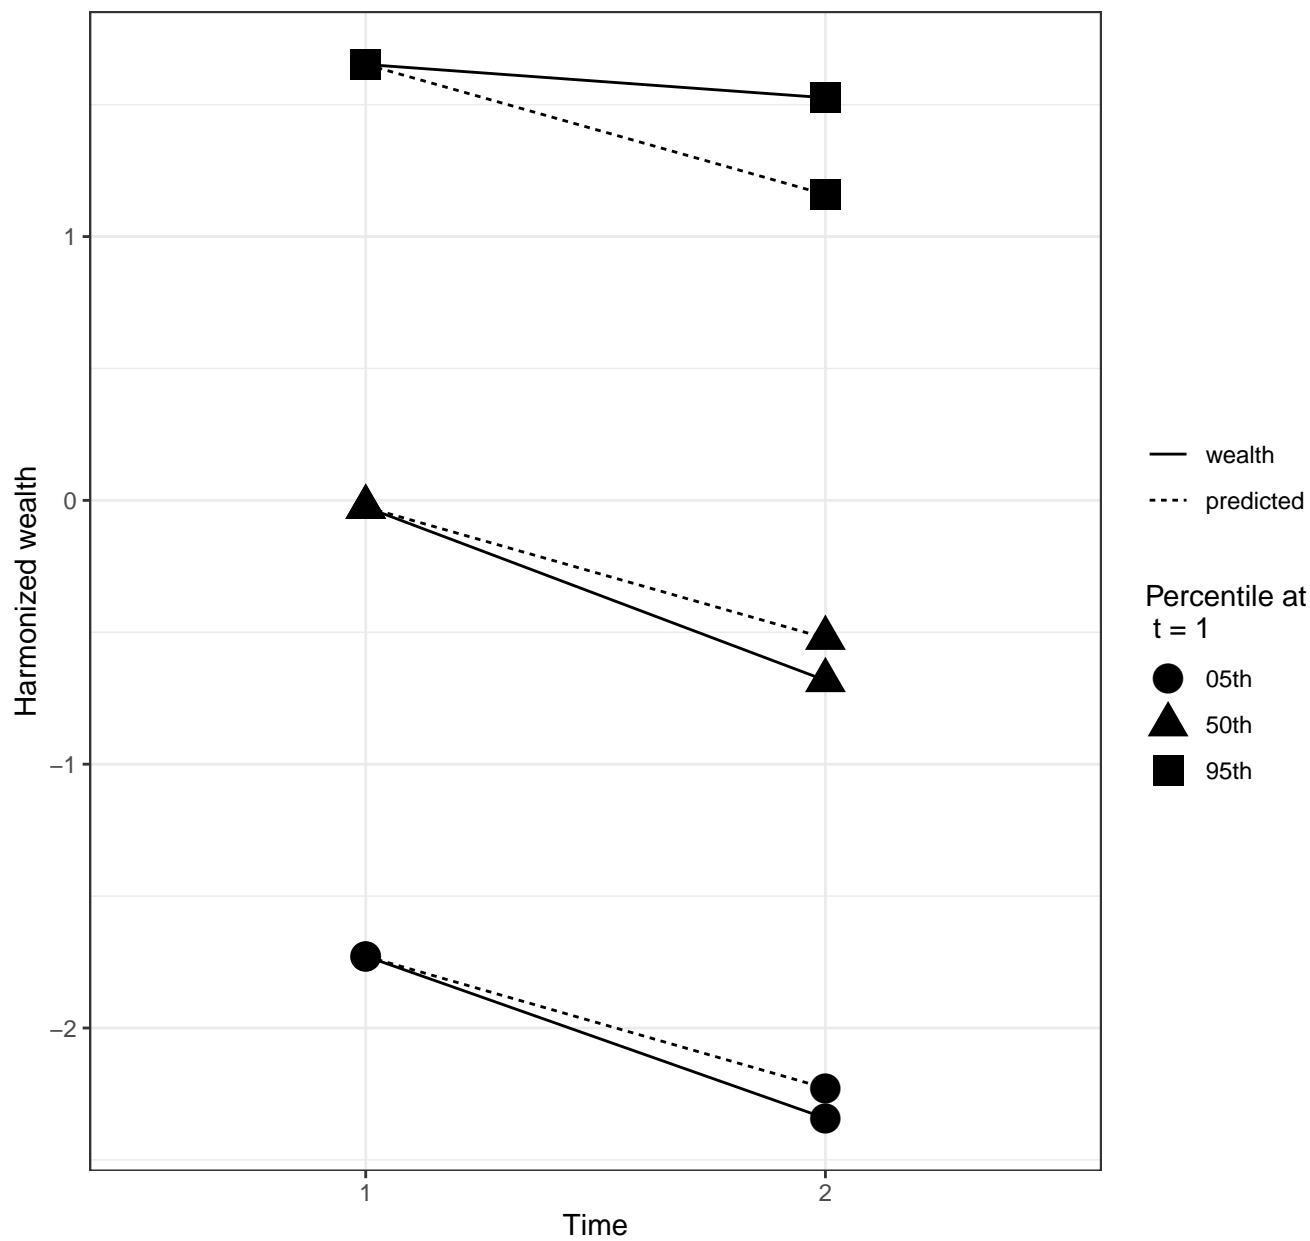

$w_2 = -0.3 + 1 \cdot w_1 + N(0, 0.2);$   
Variance at time 2: time 1 = 1.1

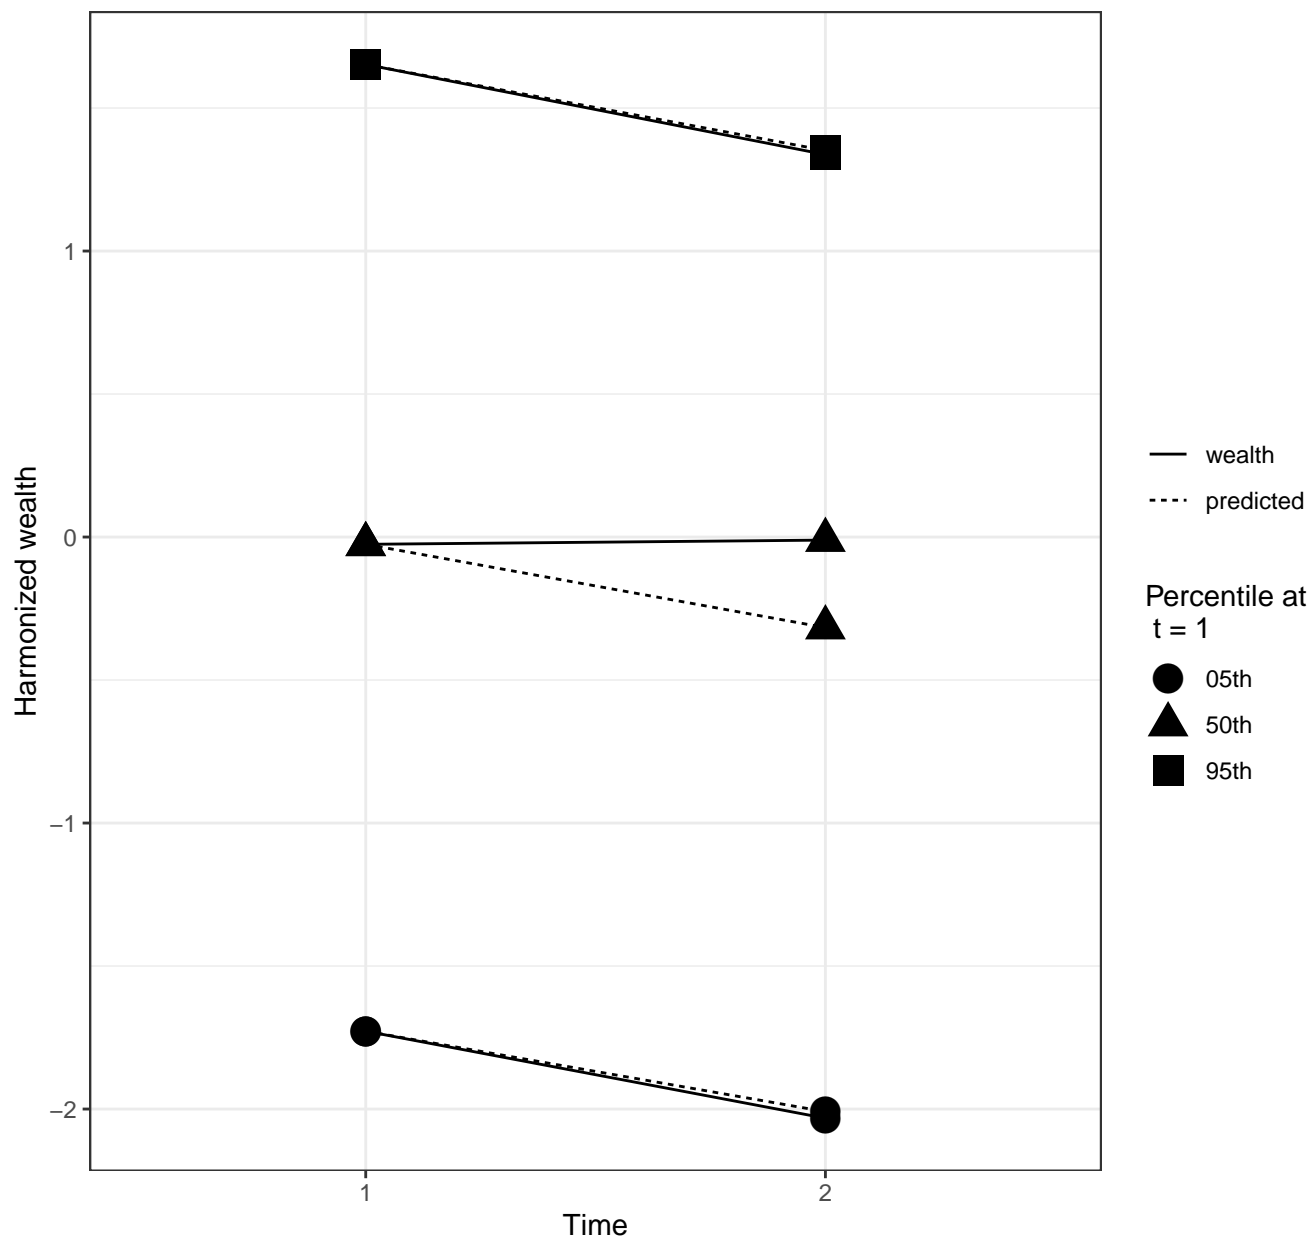

$w_2 = 0 + 1 \cdot w_1 + N(0, 0.2);$   
Variance at time 2: time 1 = 1.1

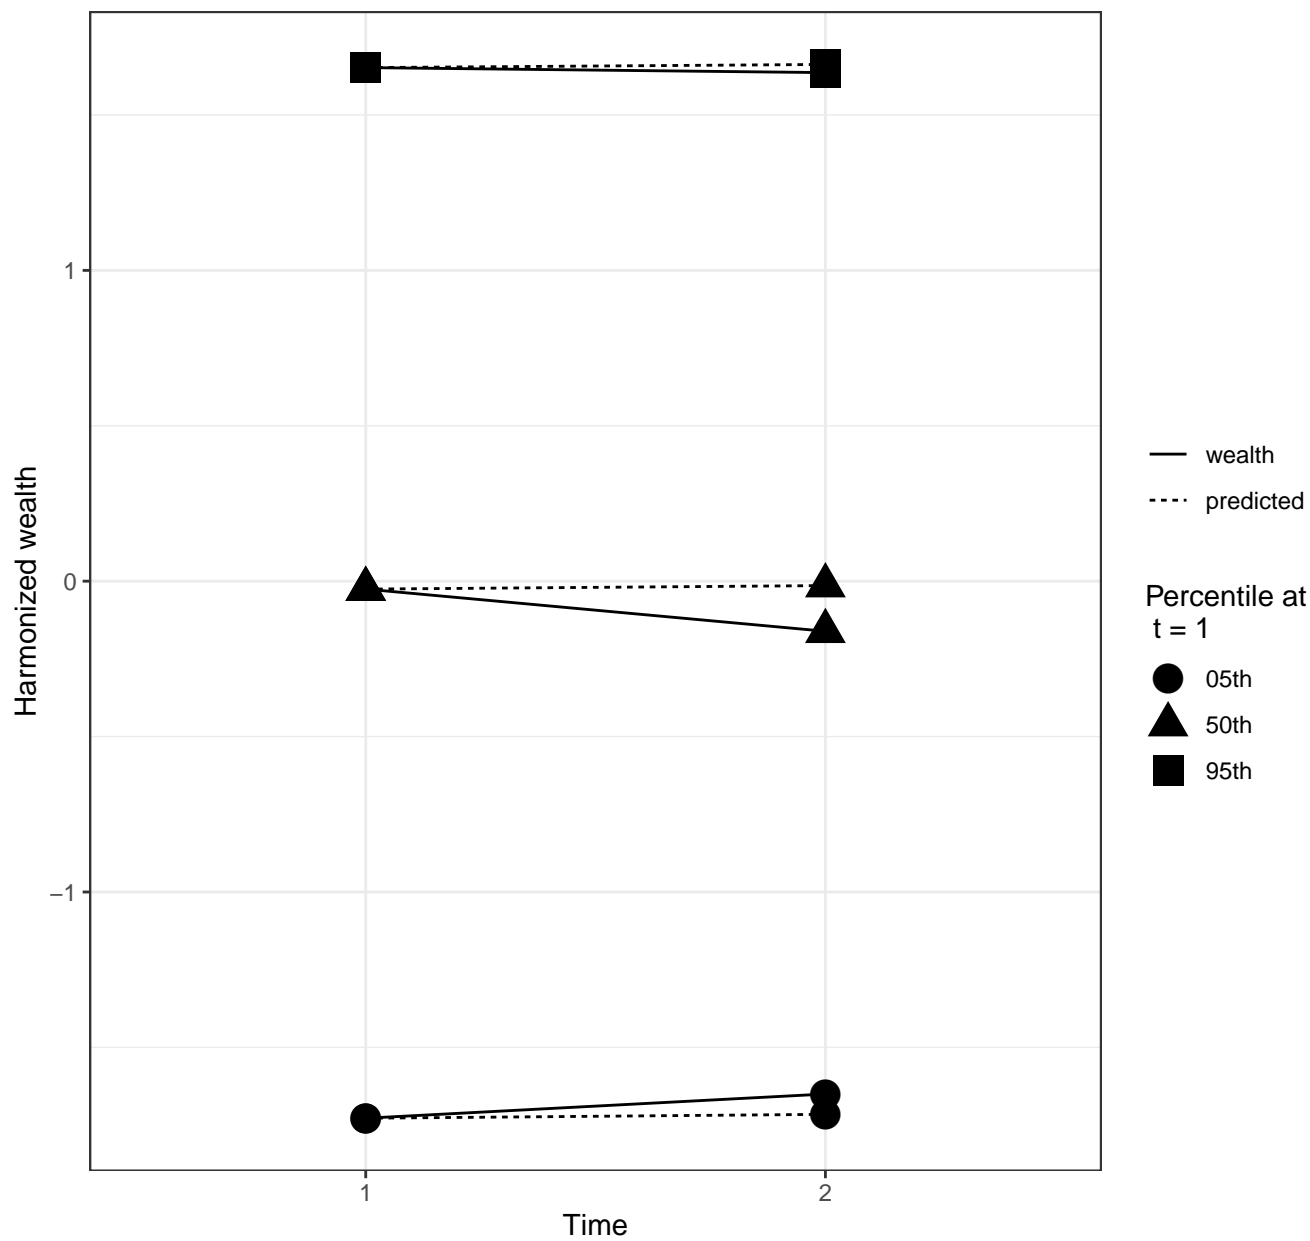



$w_2 = 0.3 + 1 \cdot w_1 + N(0, 0.2);$   
Variance at time 2: time 1 = 1.1

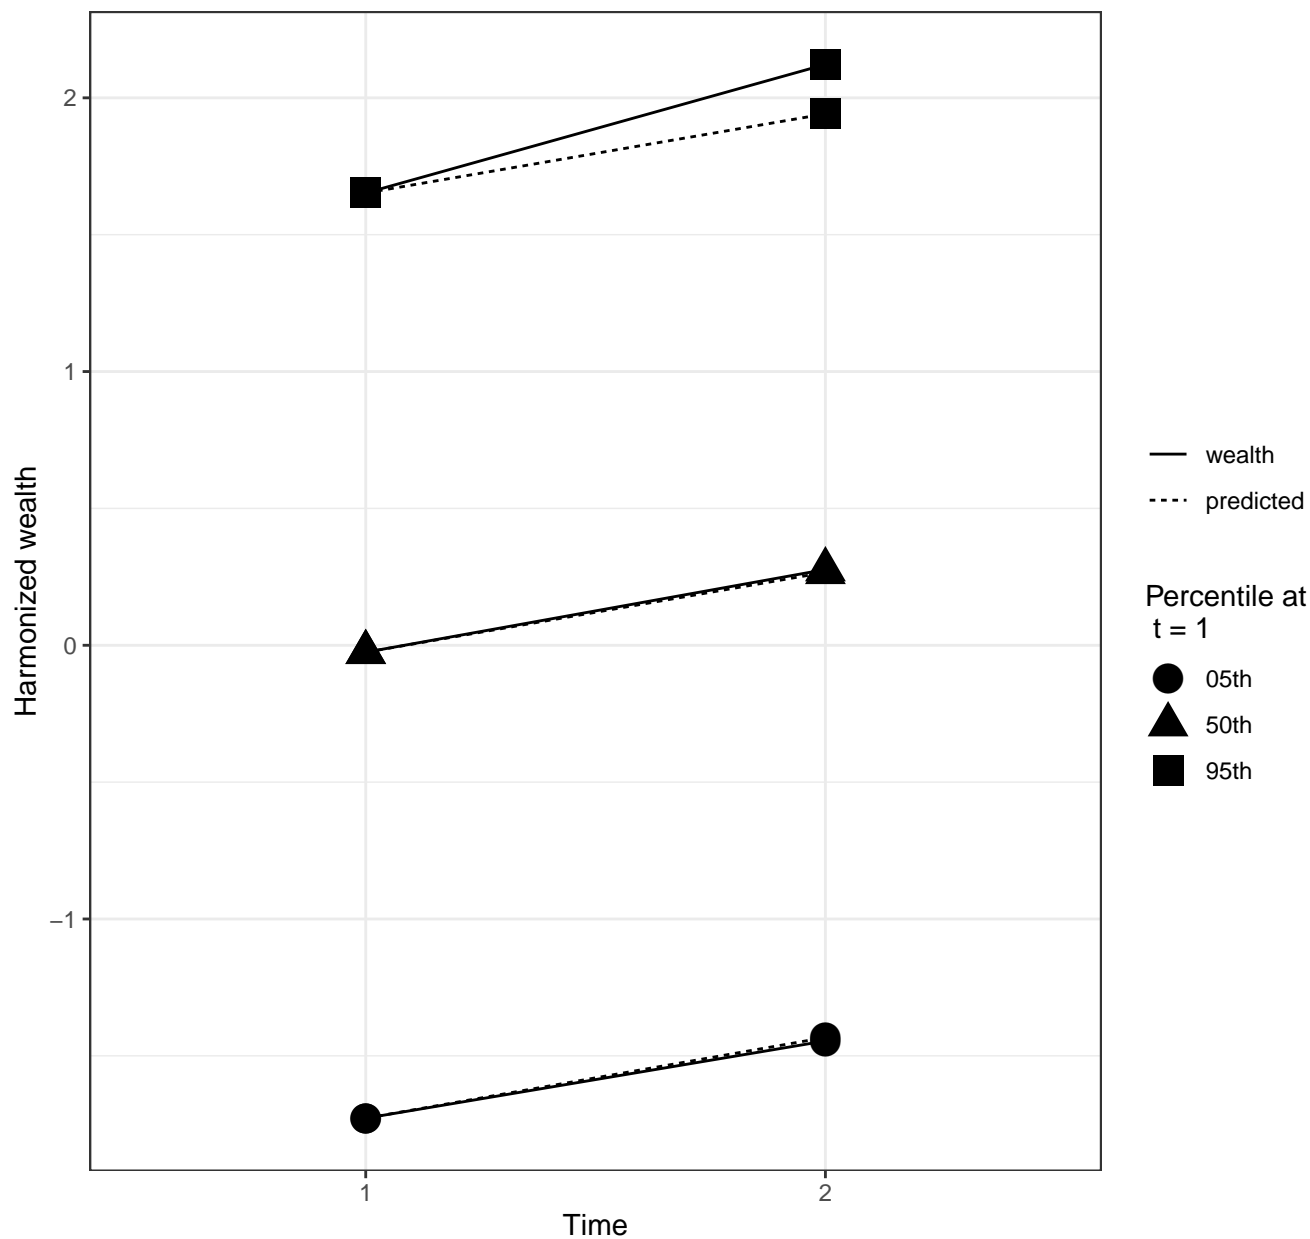

$w_2 = 0.5 + 1 \cdot w_1 + N(0, 0.2);$   
Variance at time 2: time 1 = 1.1

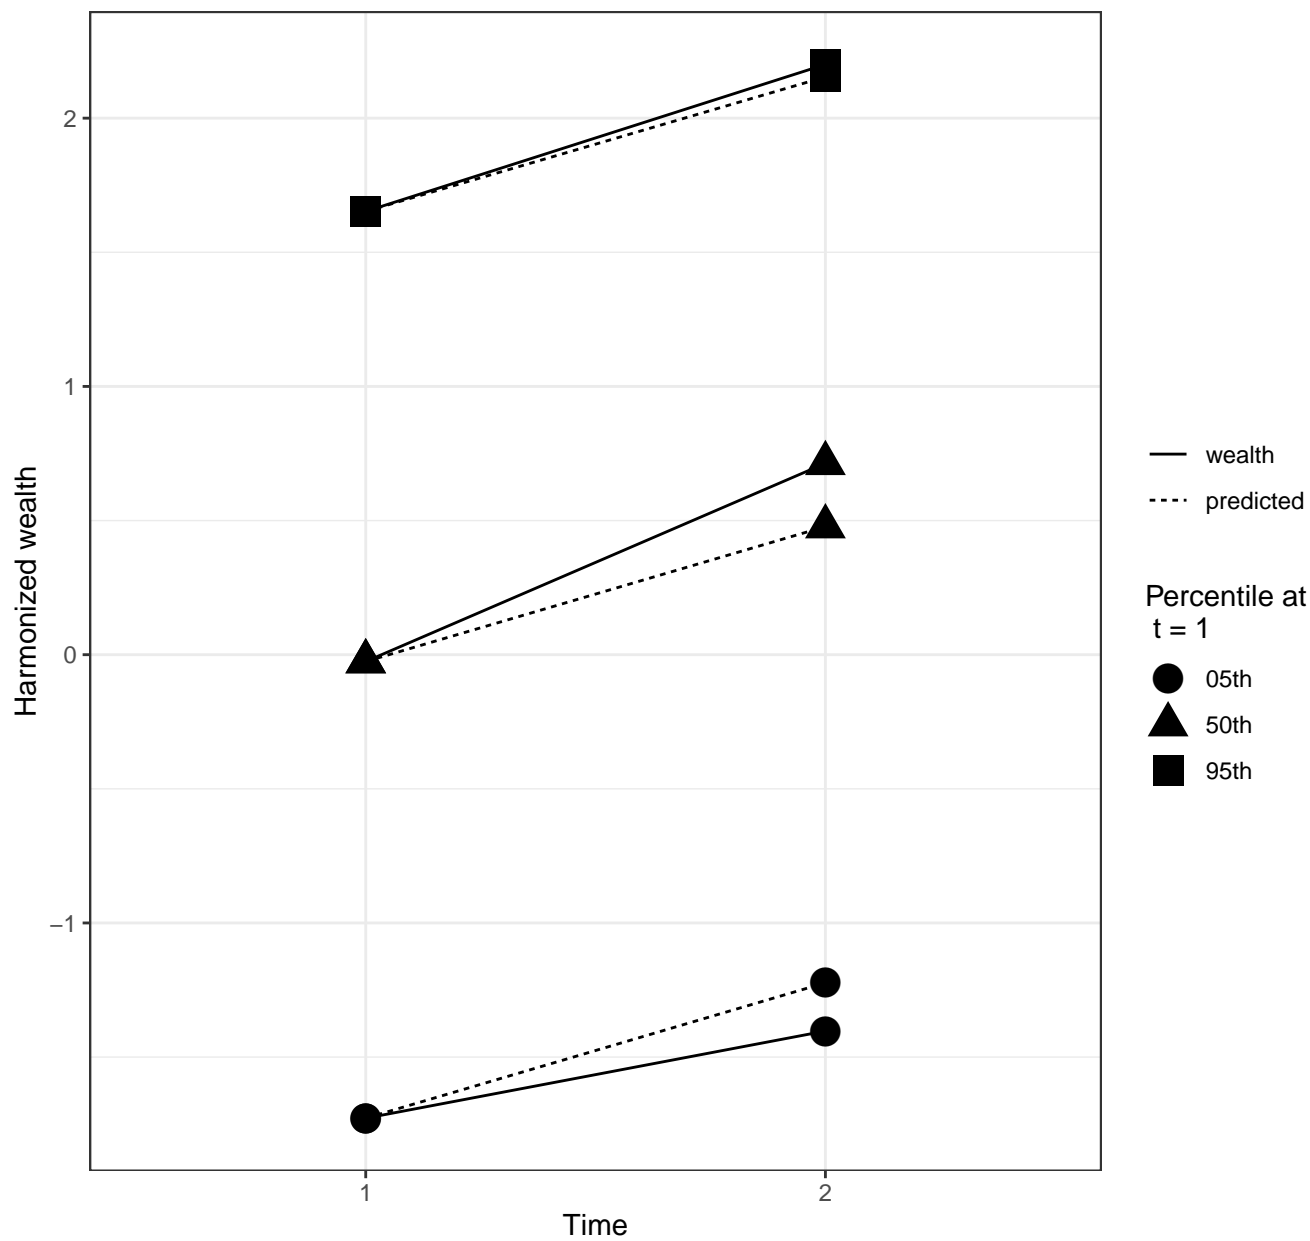

$w_2 = 1 + 1 \cdot w_1 + N(0, 0.2);$   
Variance at time 2: time 1 = 1.1

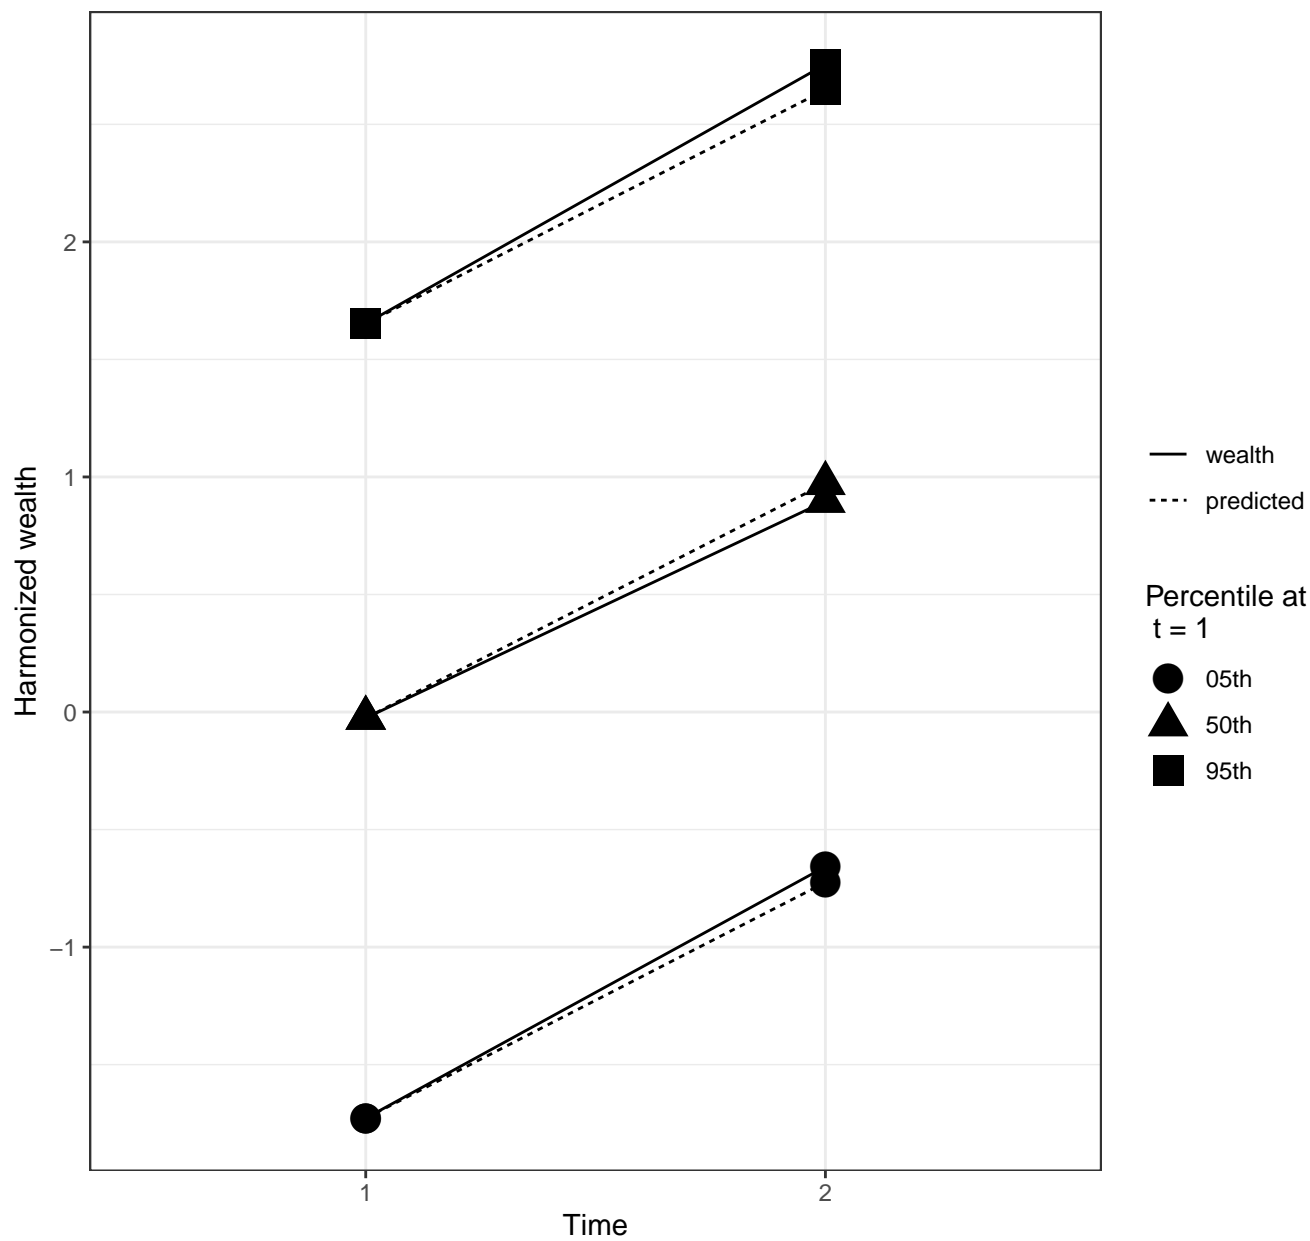

$w_2 = -1 + -1 * w_1 + N(0,0.5);$   
Variance at time 2: time 1 = 1.3

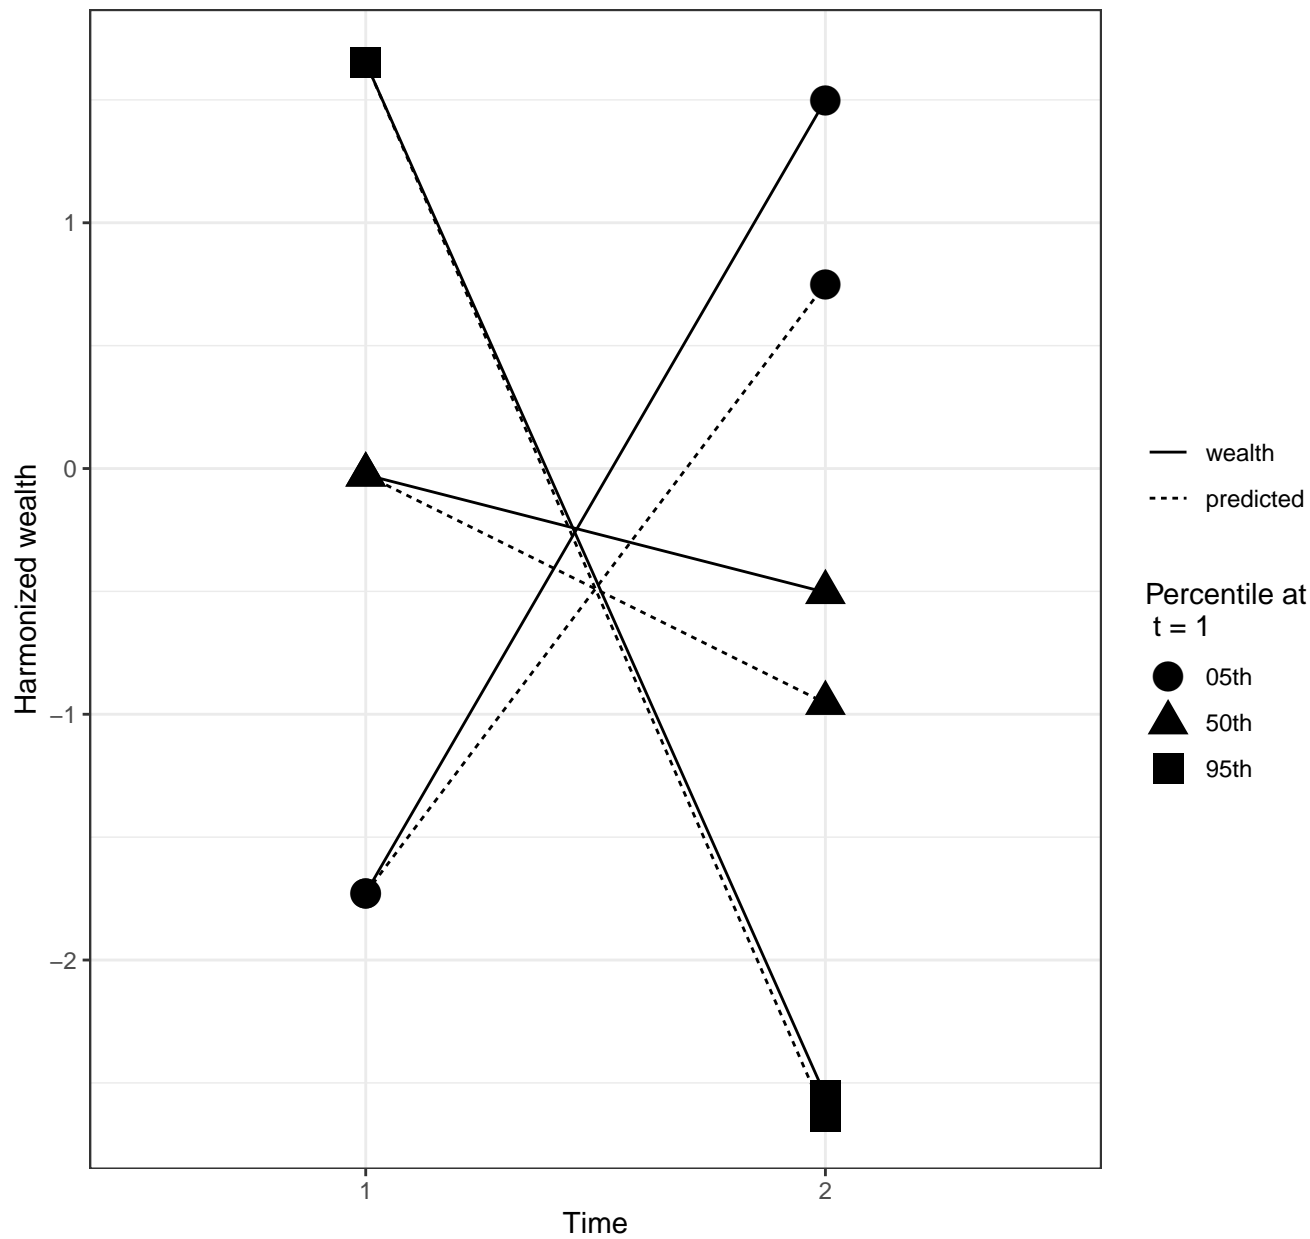

$w_2 = -0.5 + -1 \cdot w_1 + N(0, 0.5);$   
Variance at time 2: time 1 = 1.3

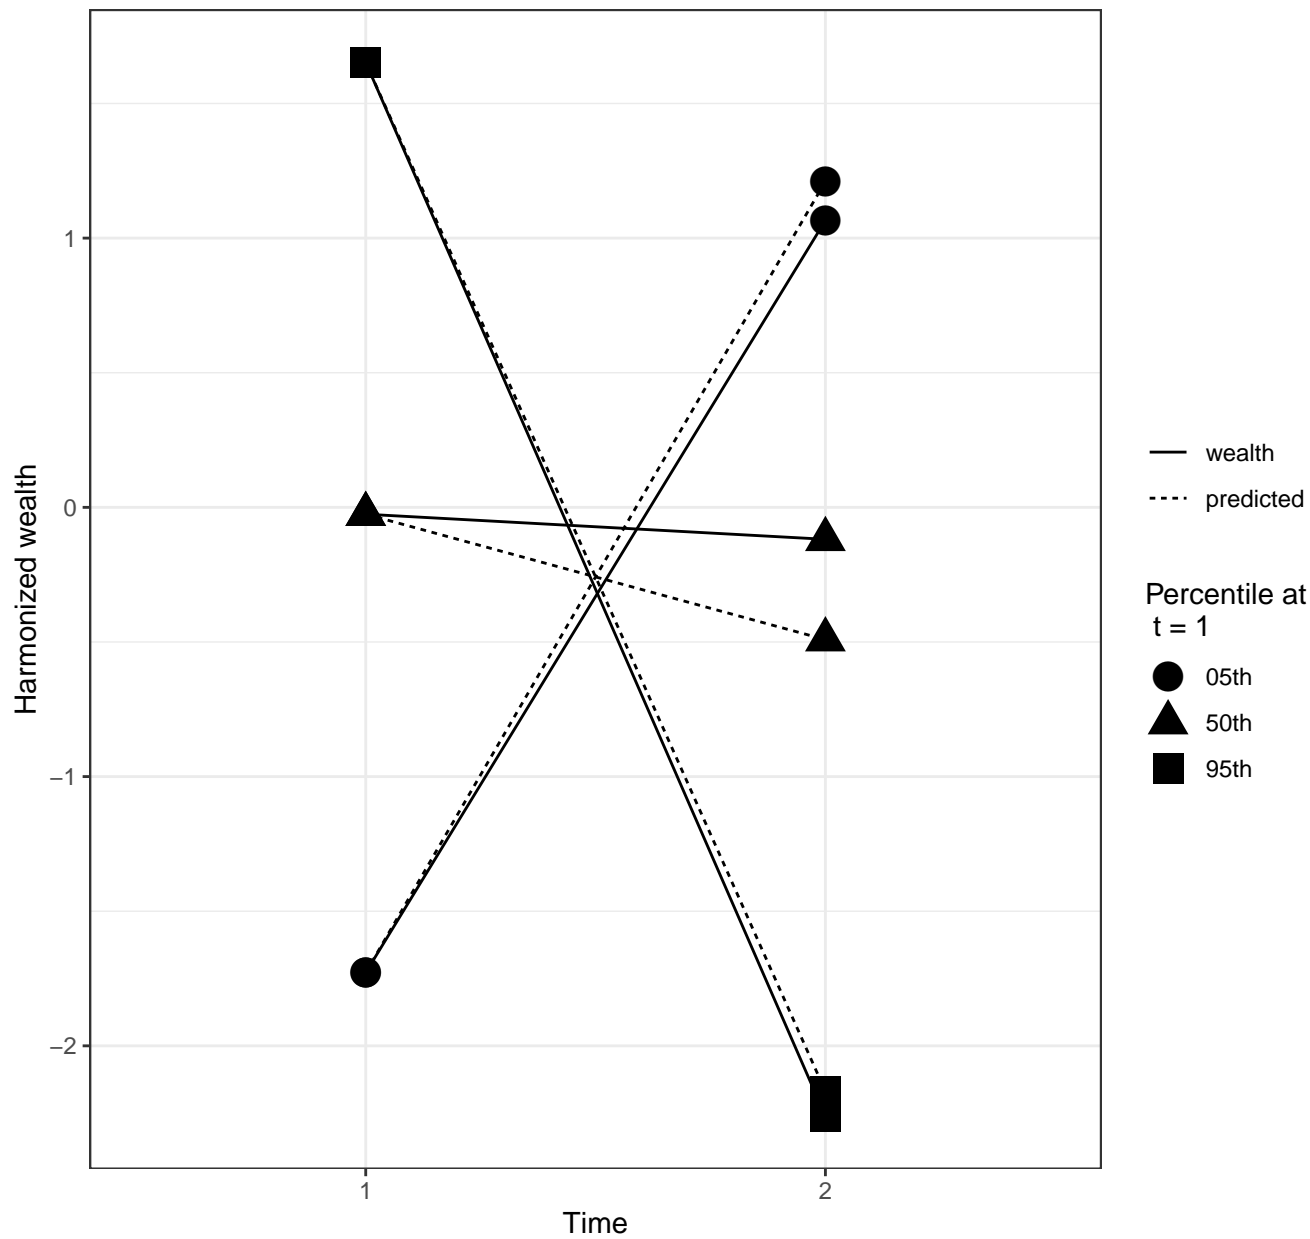

$w_2 = -0.3 + -1 \cdot w_1 + N(0, 0.5);$   
Variance at time 2: time 1 = 1.3

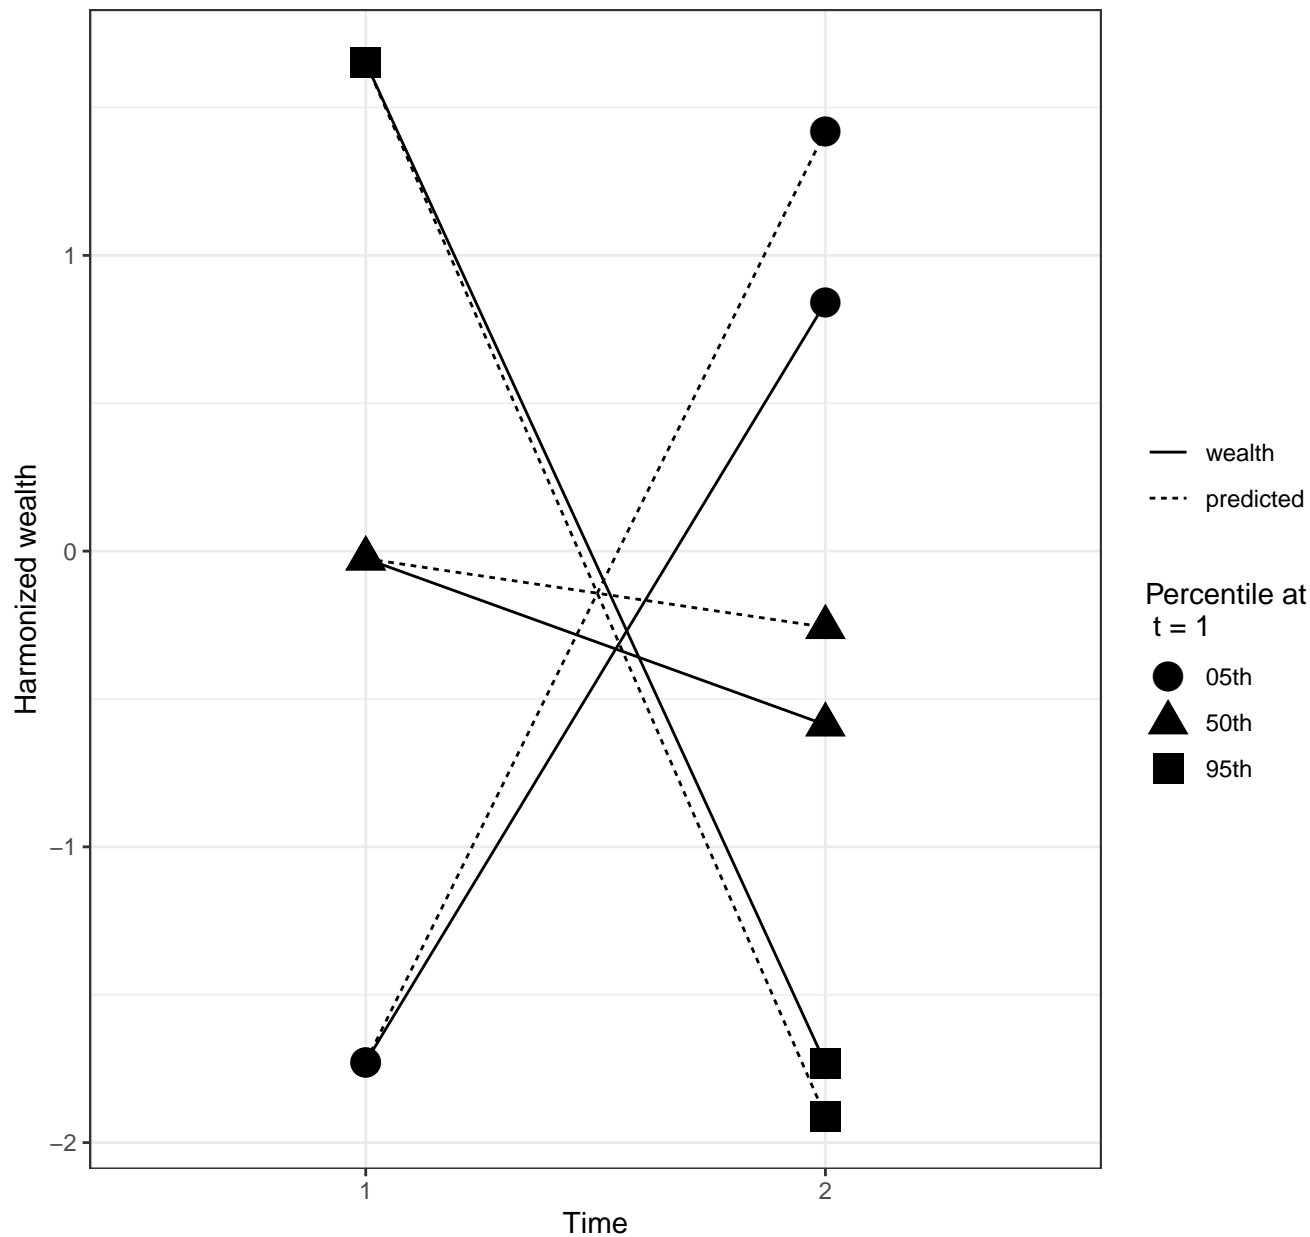

$w_2 = 0 + -1 * w_1 + N(0, 0.5);$   
Variance at time 2: time 1 = 1.3

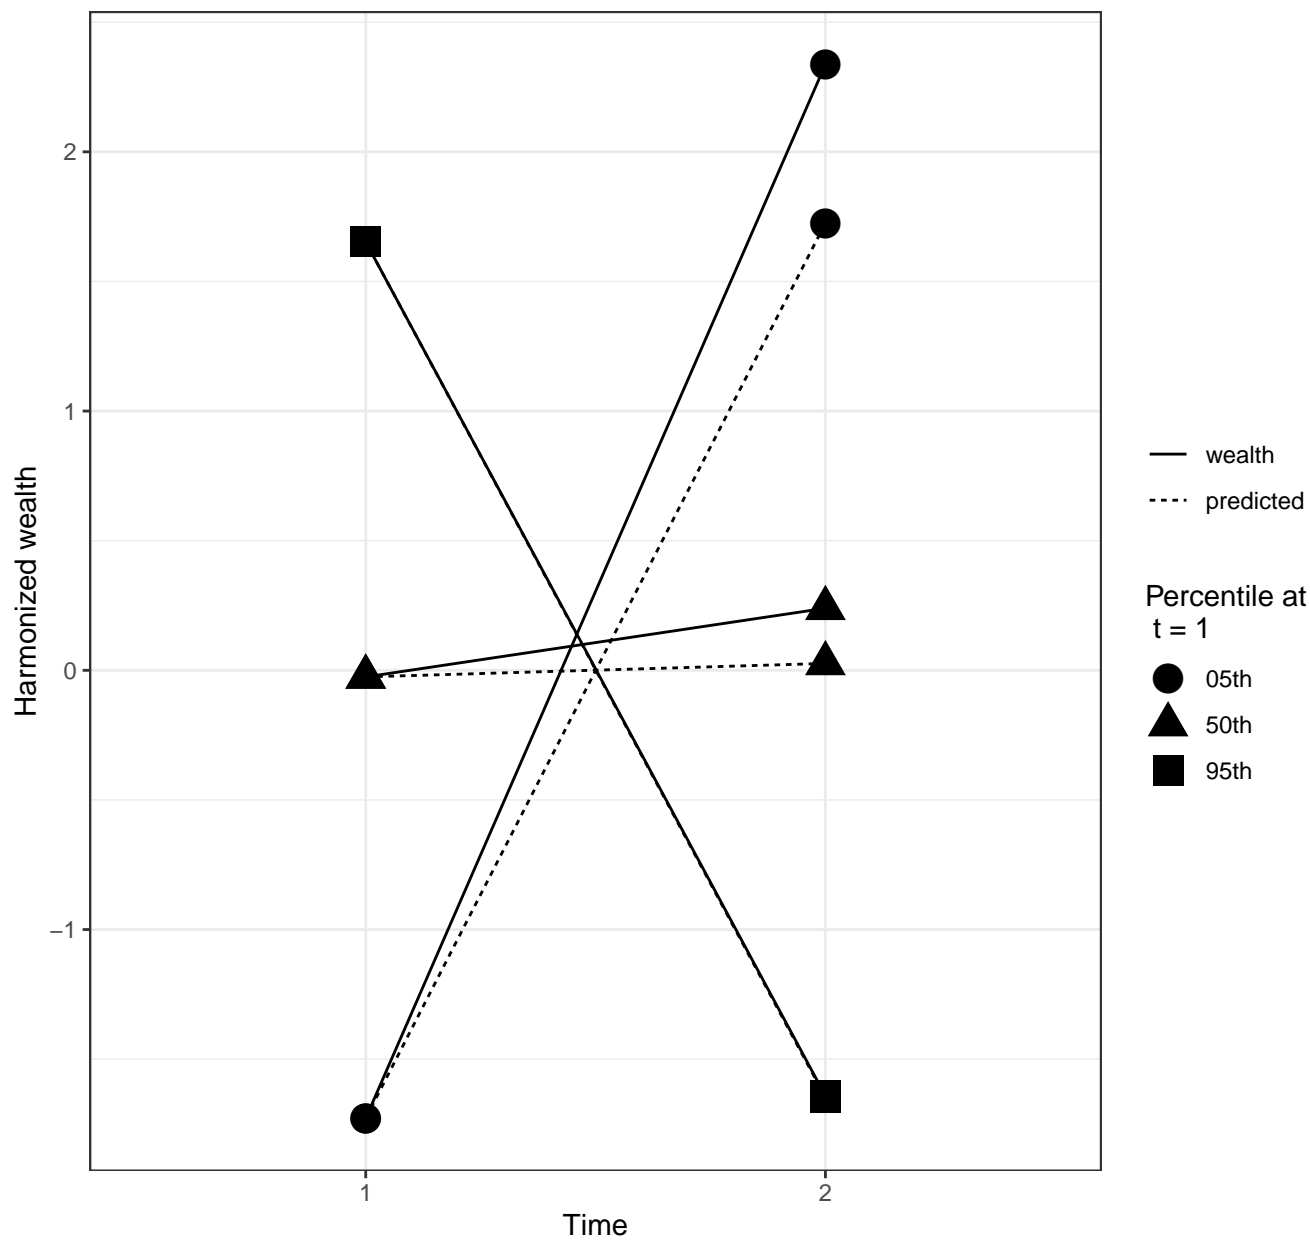

$w_2 = 0.3 + -1 * w_1 + N(0,0.5);$   
Variance at time 2: time 1 = 1.2

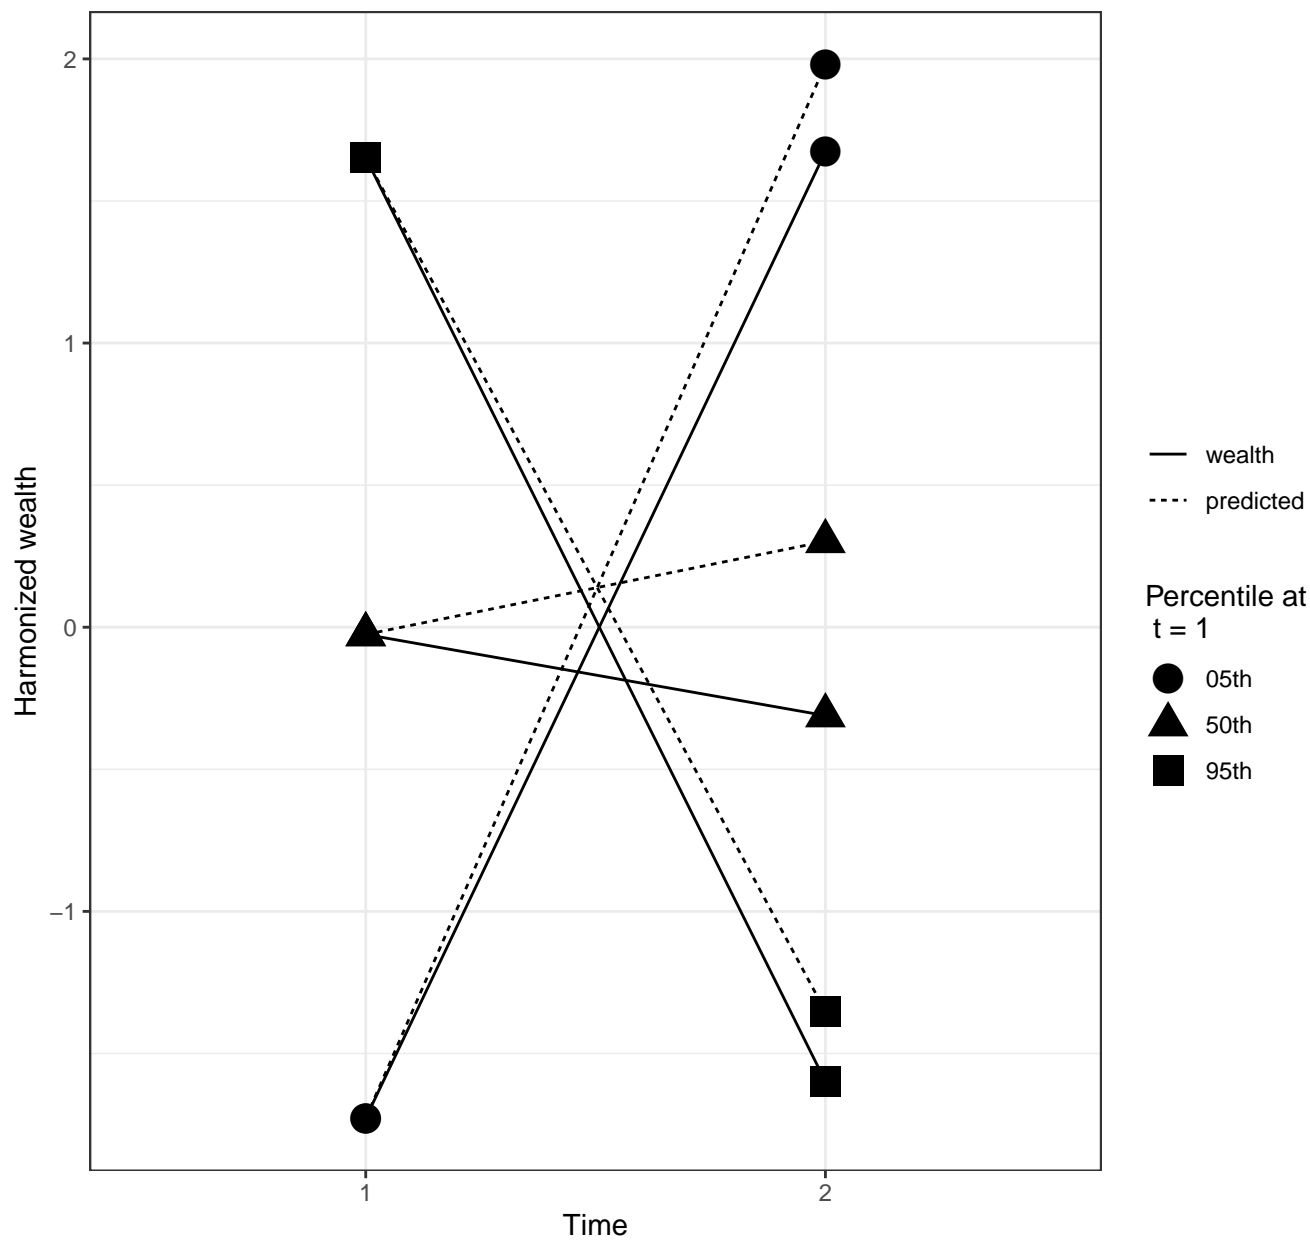



$w_2 = 0.5 + -1 * w_1 + N(0, 0.5);$   
Variance at time 2: time 1 = 1.3

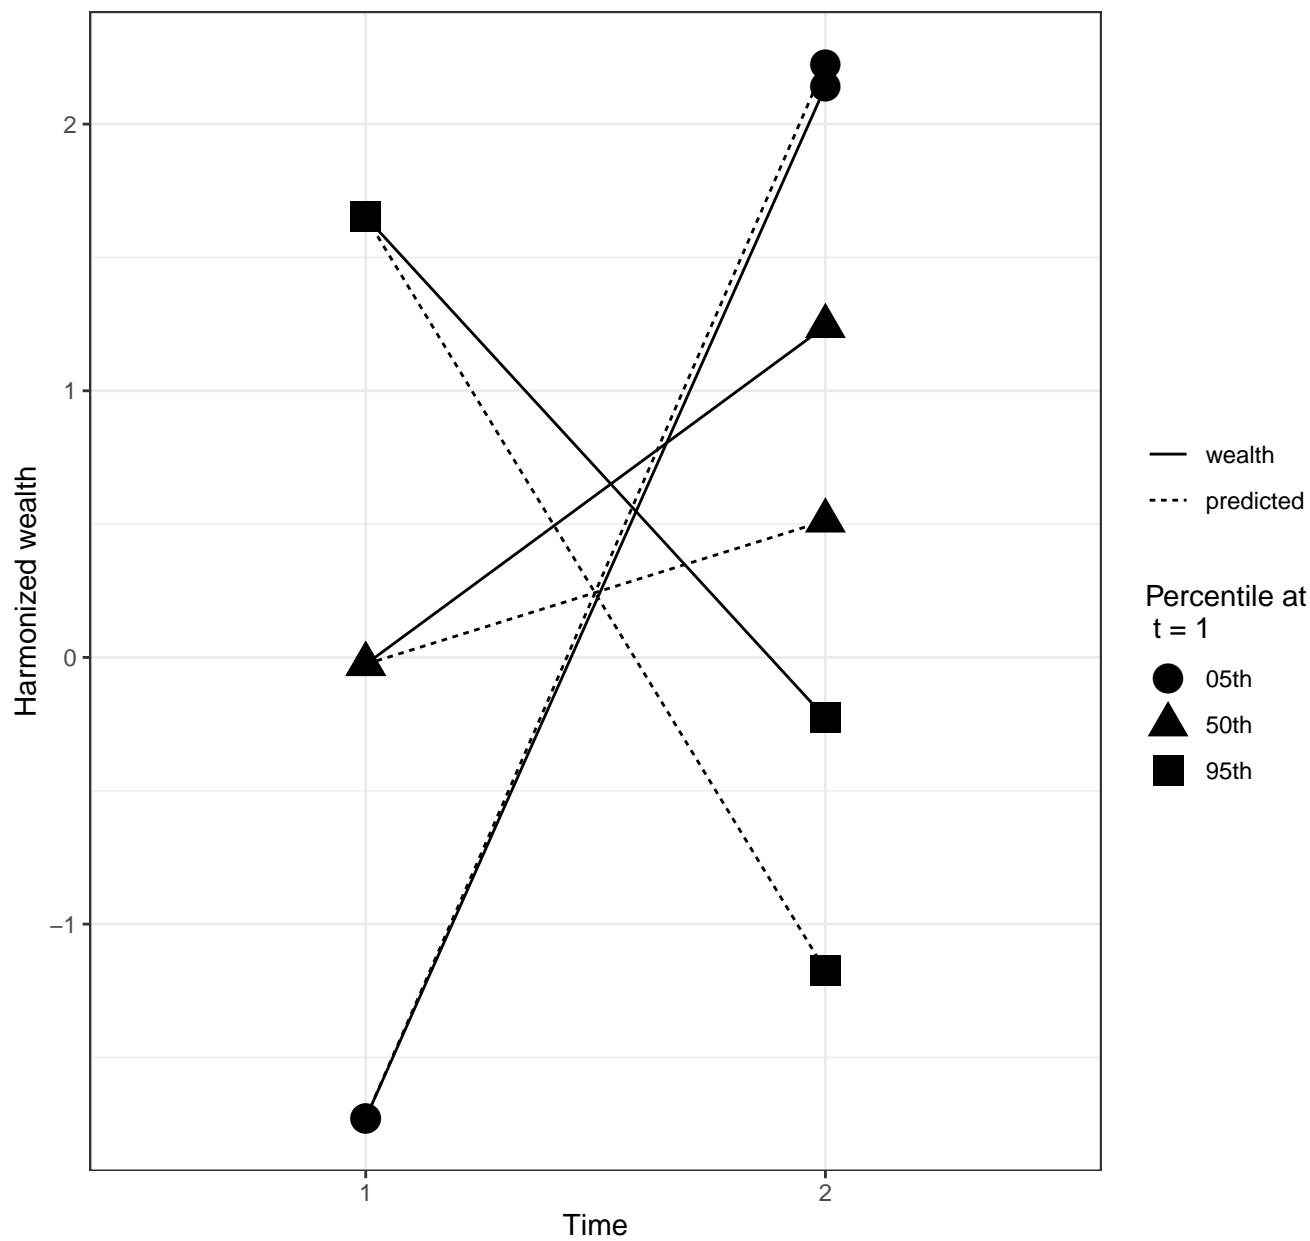

$w_2 = 1 + -1 * w_1 + N(0, 0.5);$   
Variance at time 2: time 1 = 1.3

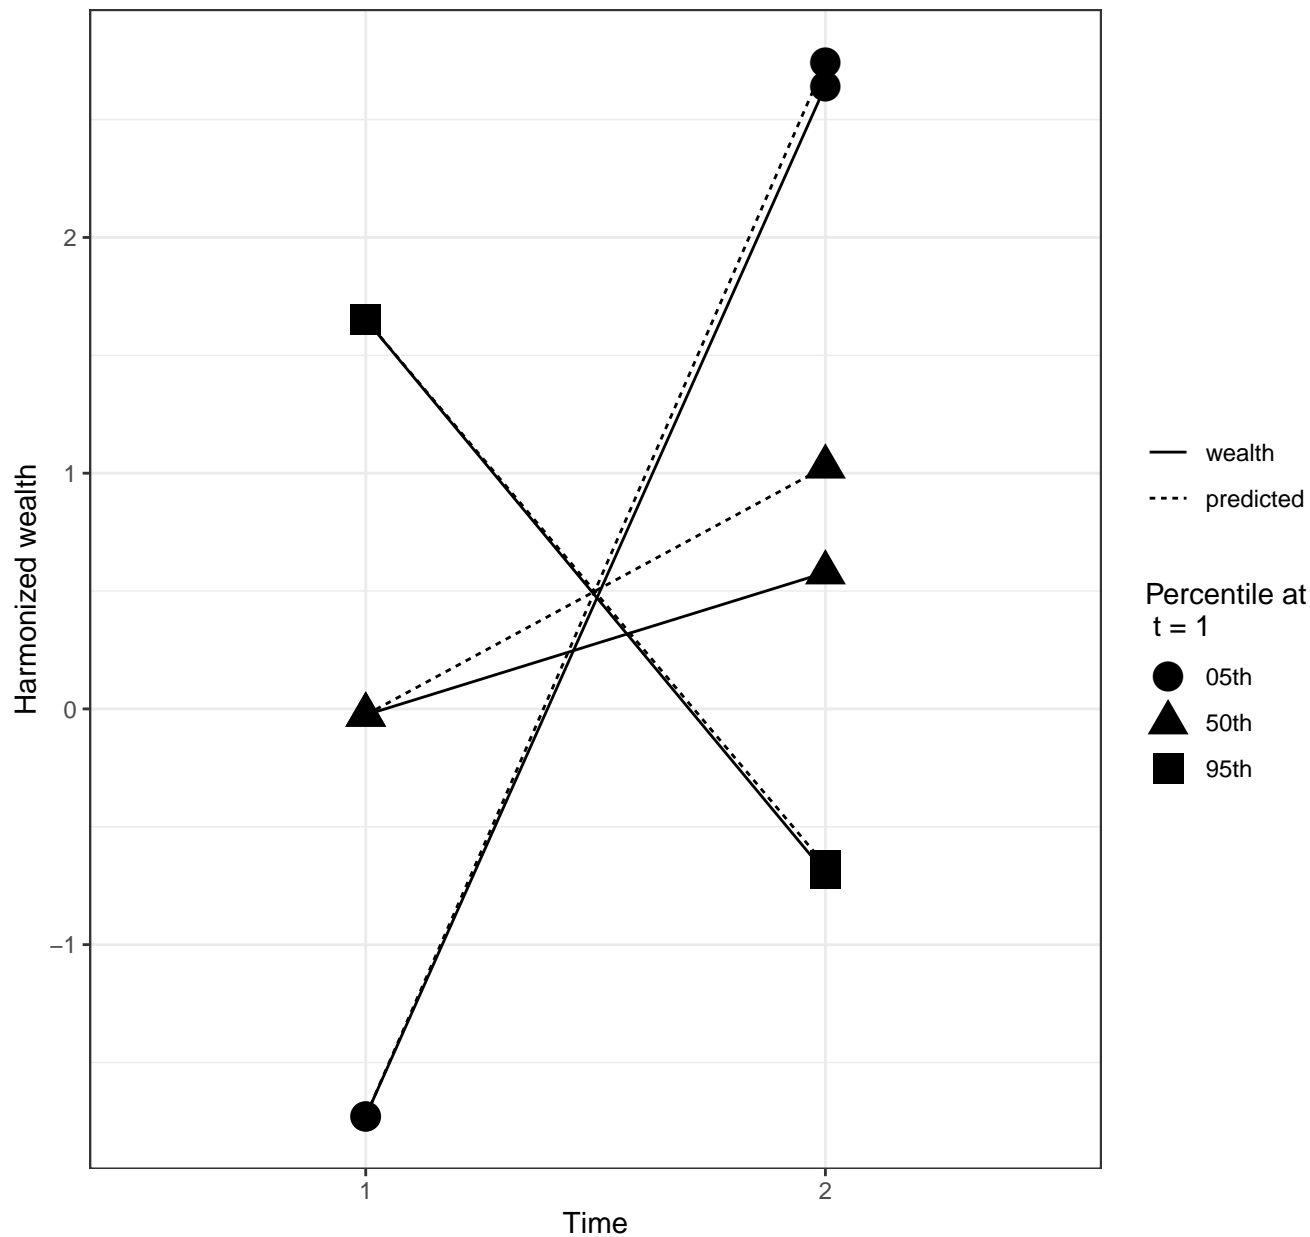

$w_2 = -1 + -0.5*w_1 + N(0,0.5);$   
Variance at time 2: time 1 = 0.5

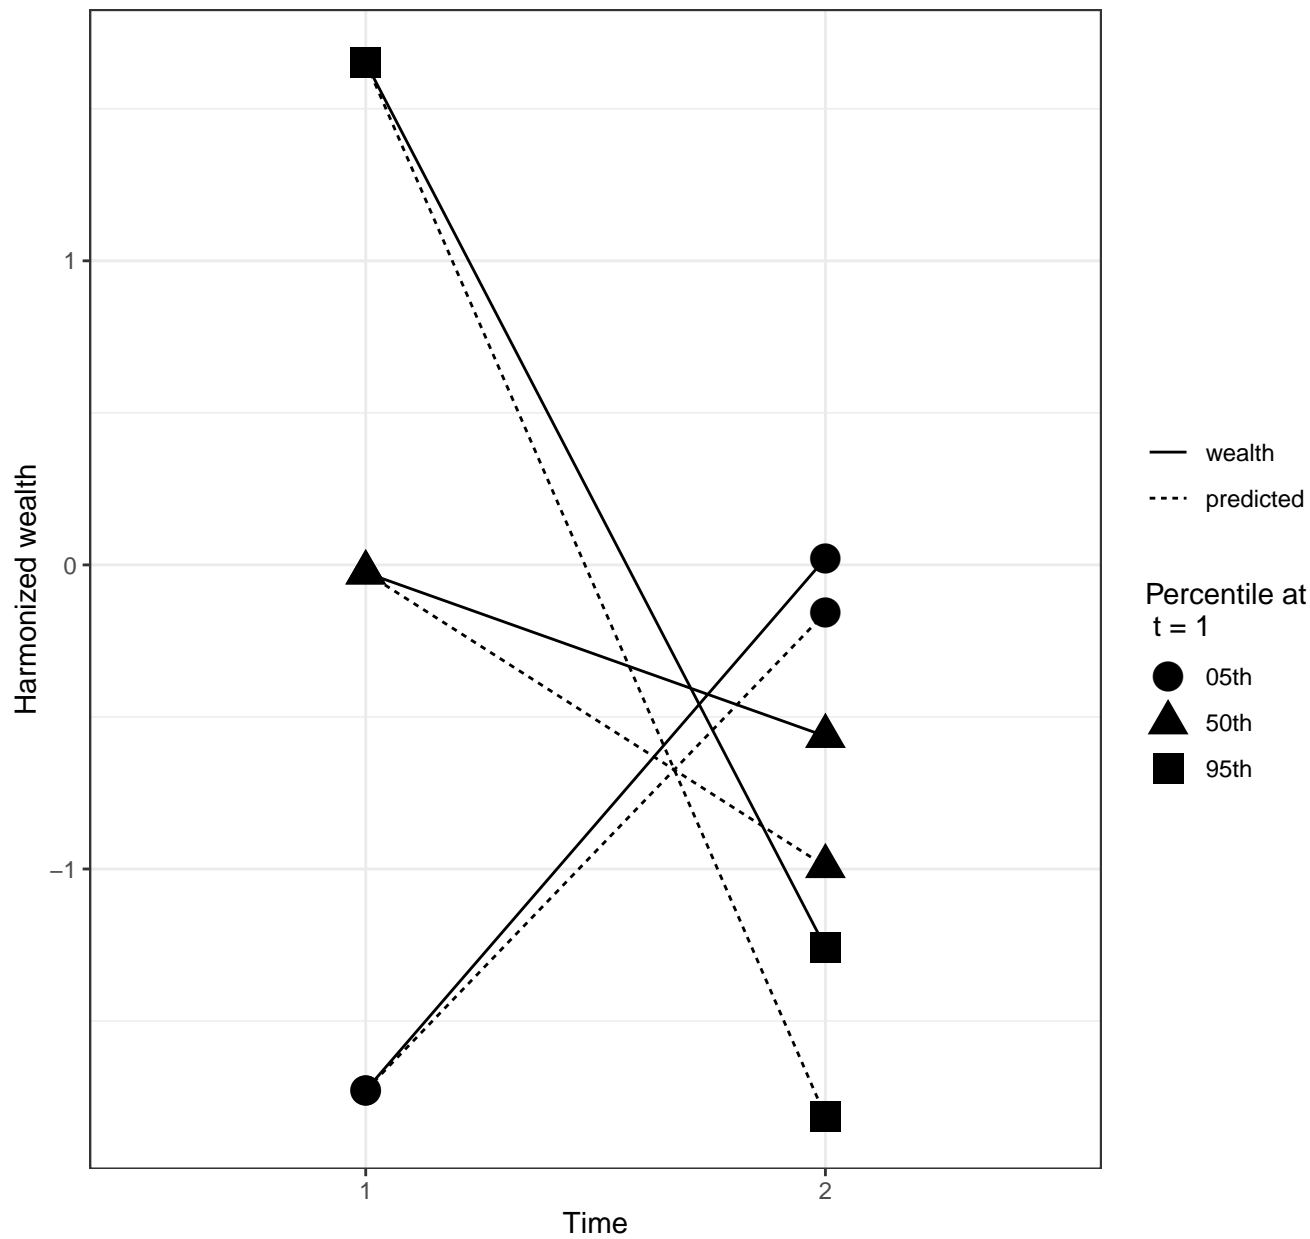

$w_2 = -0.5 + -0.5*w_1 + N(0,0.5);$   
Variance at time 2: time 1 = 0.5

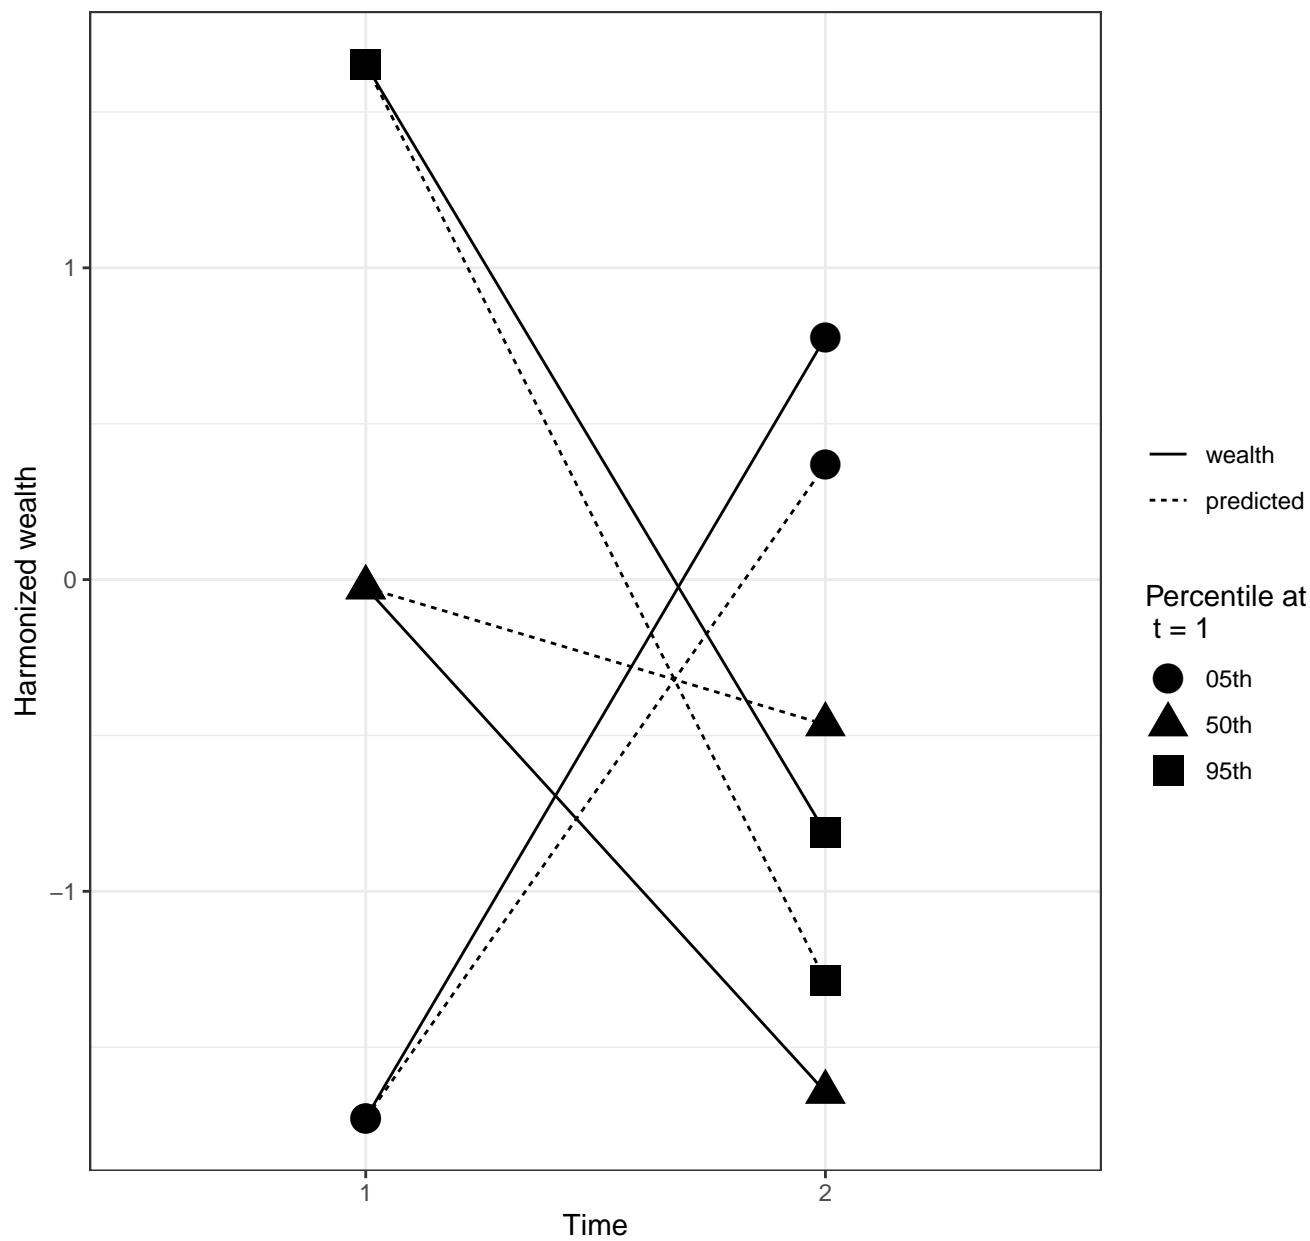

$w_2 = -0.3 + -0.5*w_1 + N(0,0.5);$   
Variance at time 2: time 1 = 0.5

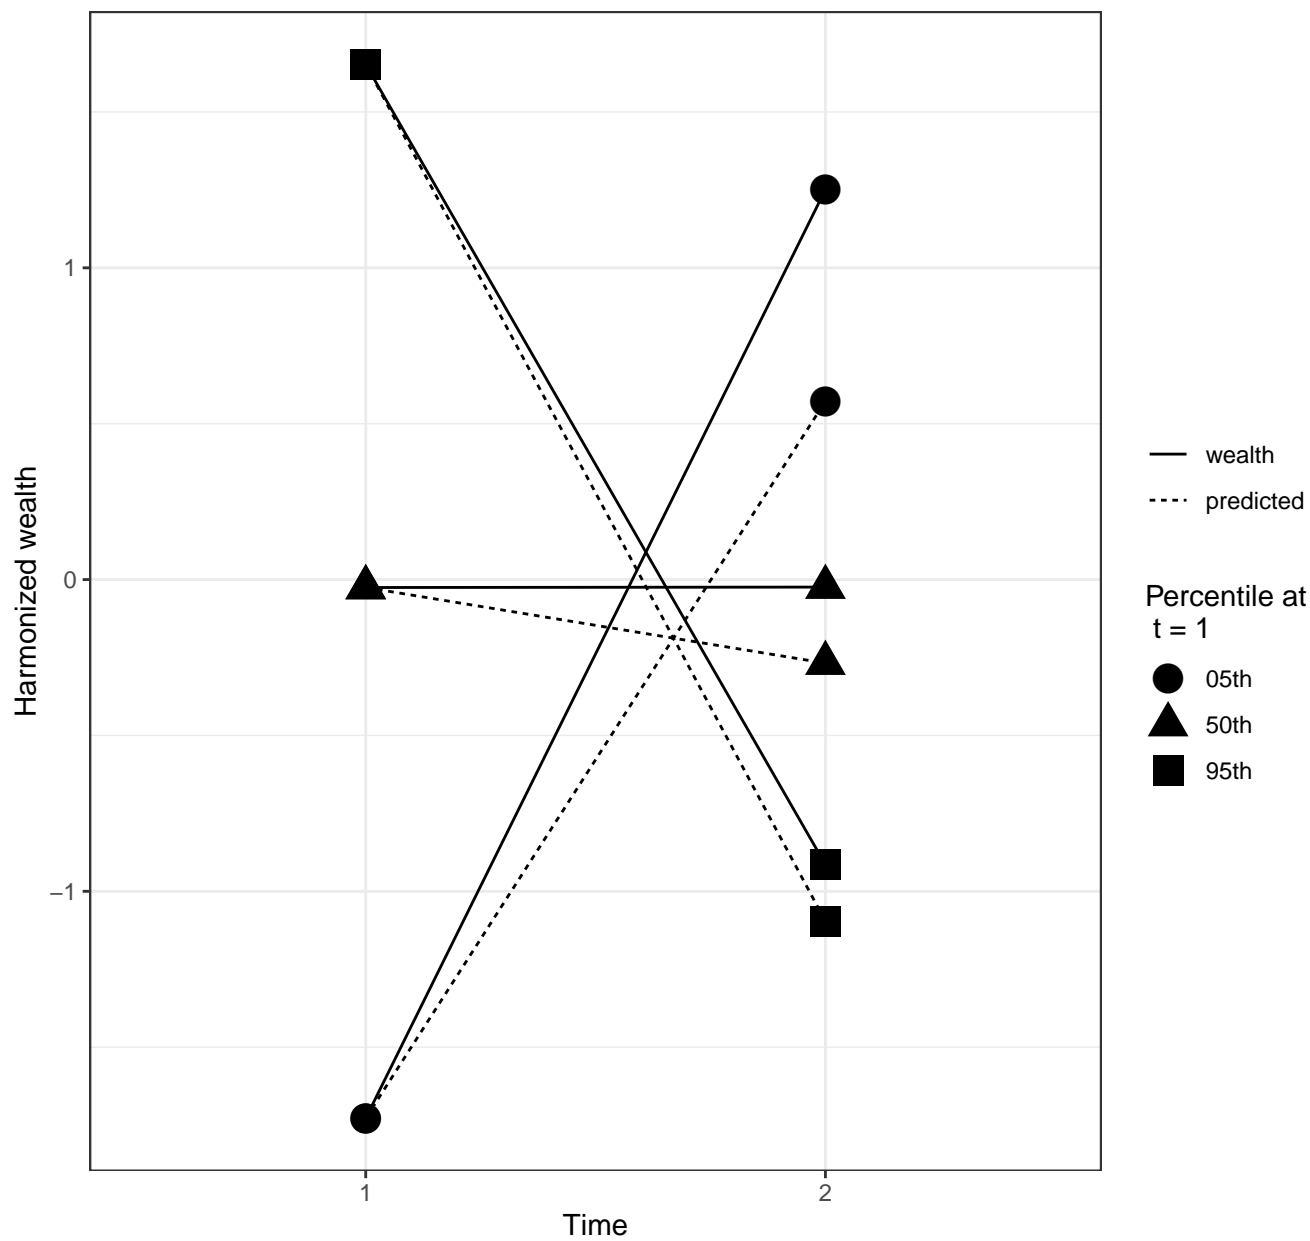

$w_2 = 0 + -0.5 * w_1 + N(0,0.5);$   
Variance at time 2: time 1 = 0.5

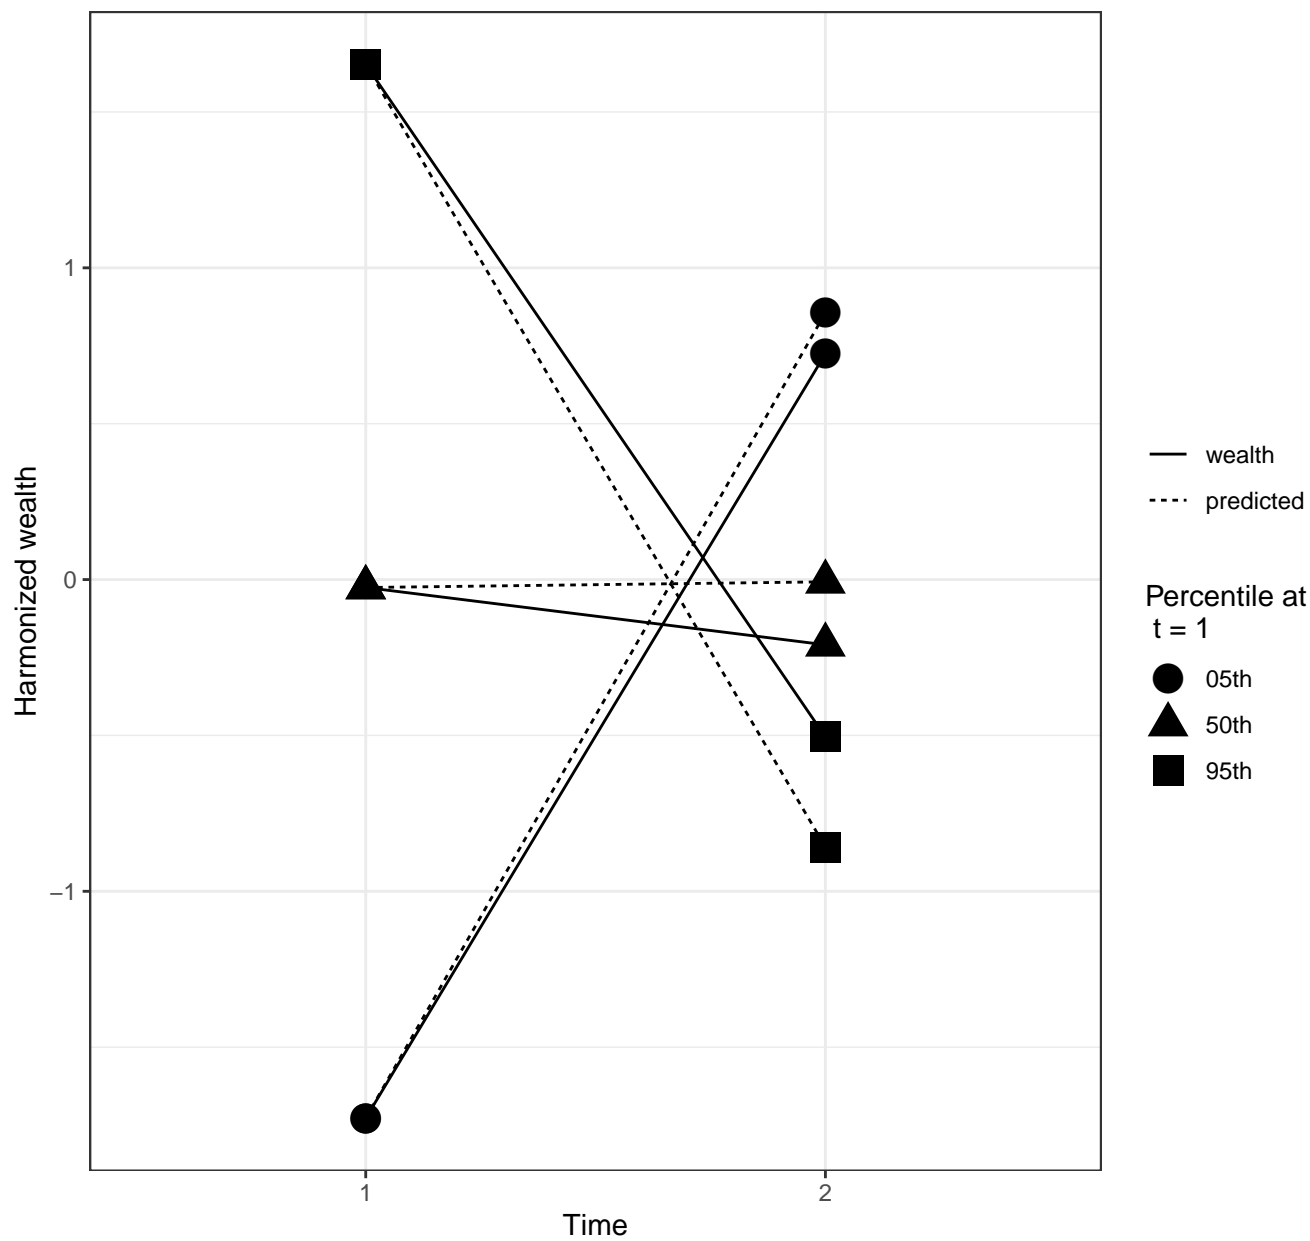

$w_2 = 0.3 + -0.5*w_1 + N(0,0.5);$   
Variance at time 2: time 1 = 0.5

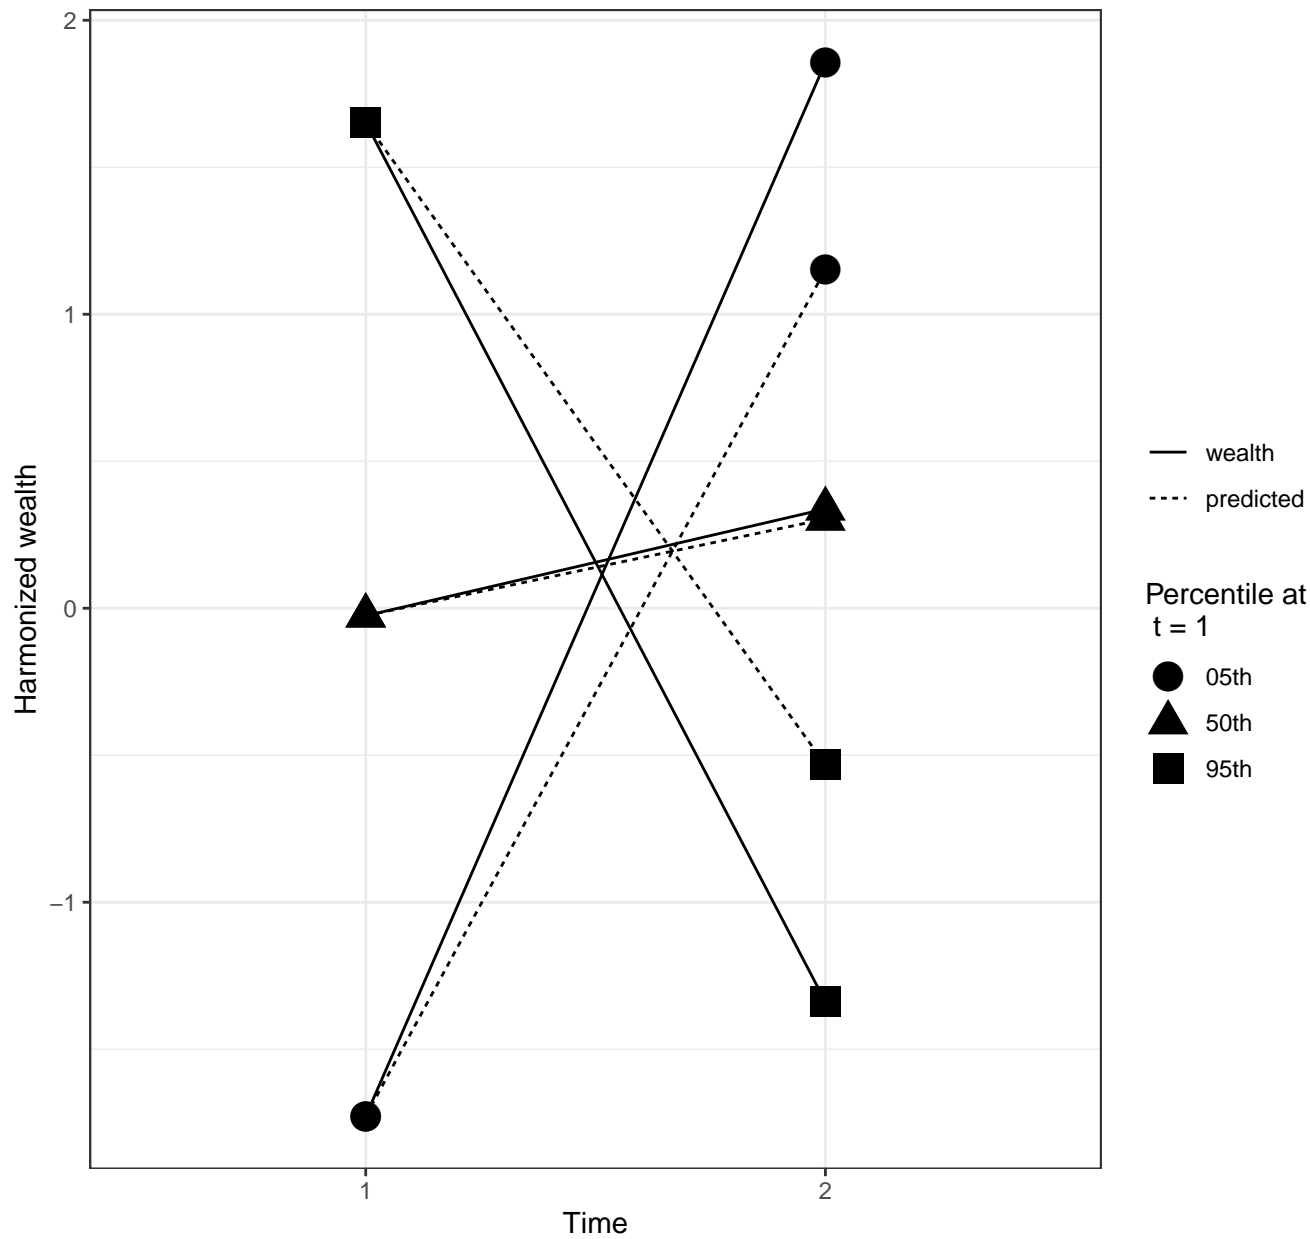

$w_2 = 0.5 + -0.5 \cdot w_1 + N(0,0.5);$   
Variance at time 2: time 1 = 0.5

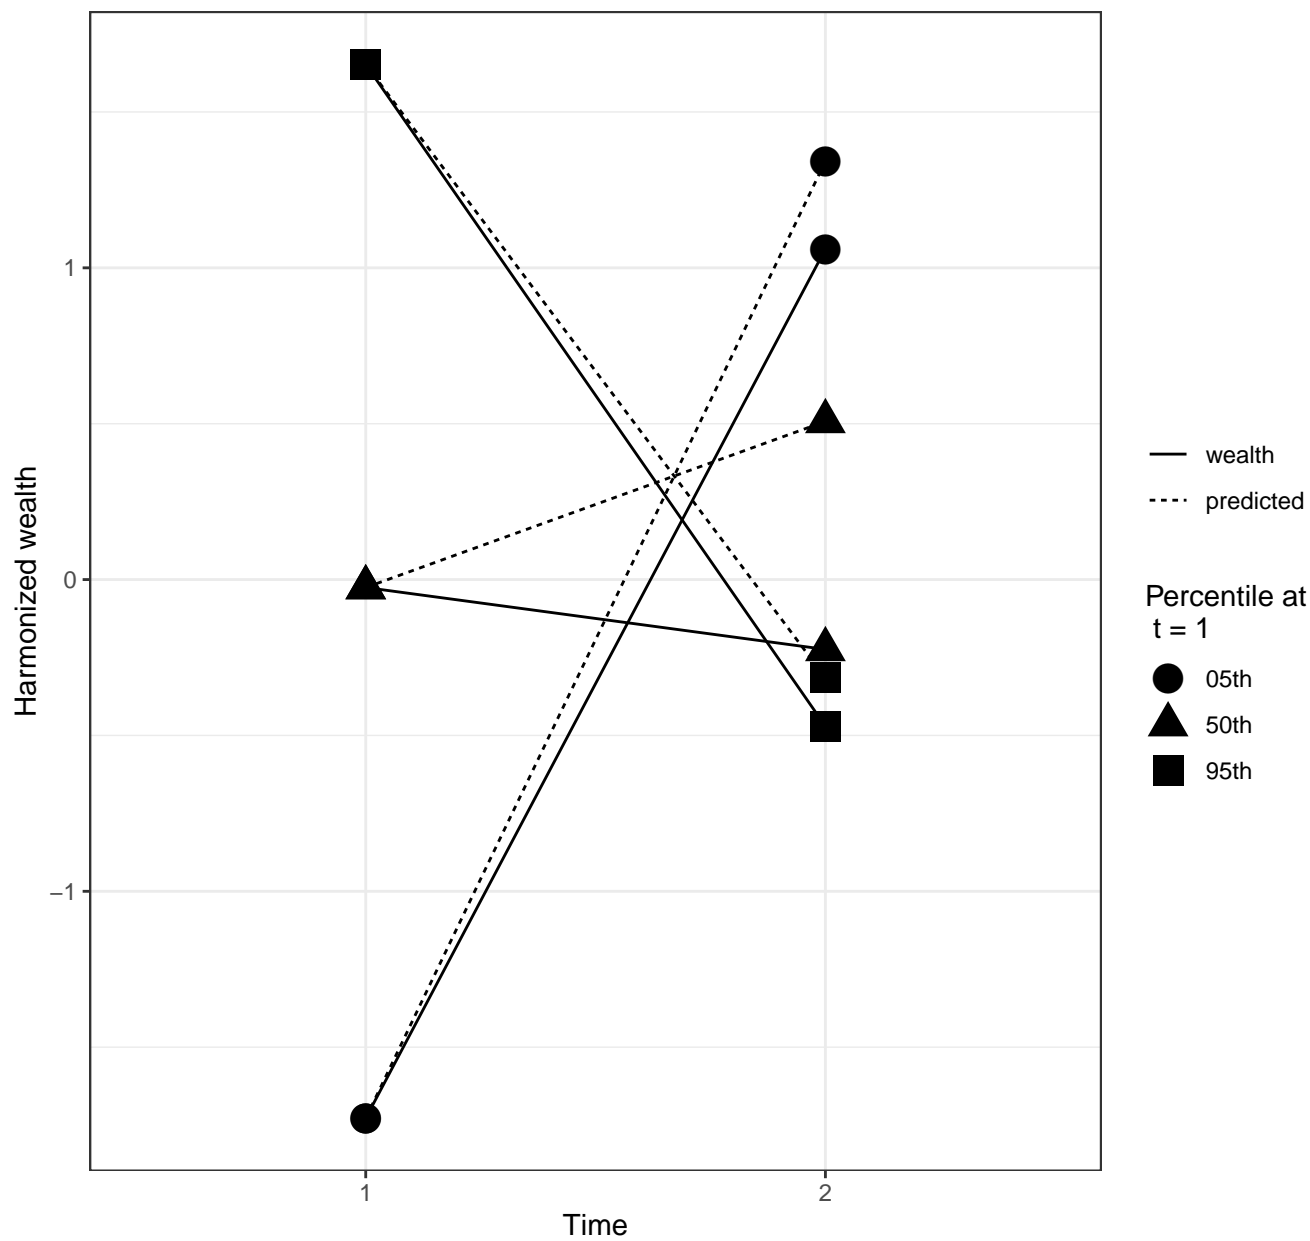



$w_2 = 1 + -0.5 * w_1 + N(0,0.5);$   
Variance at time 2: time 1 = 0.5

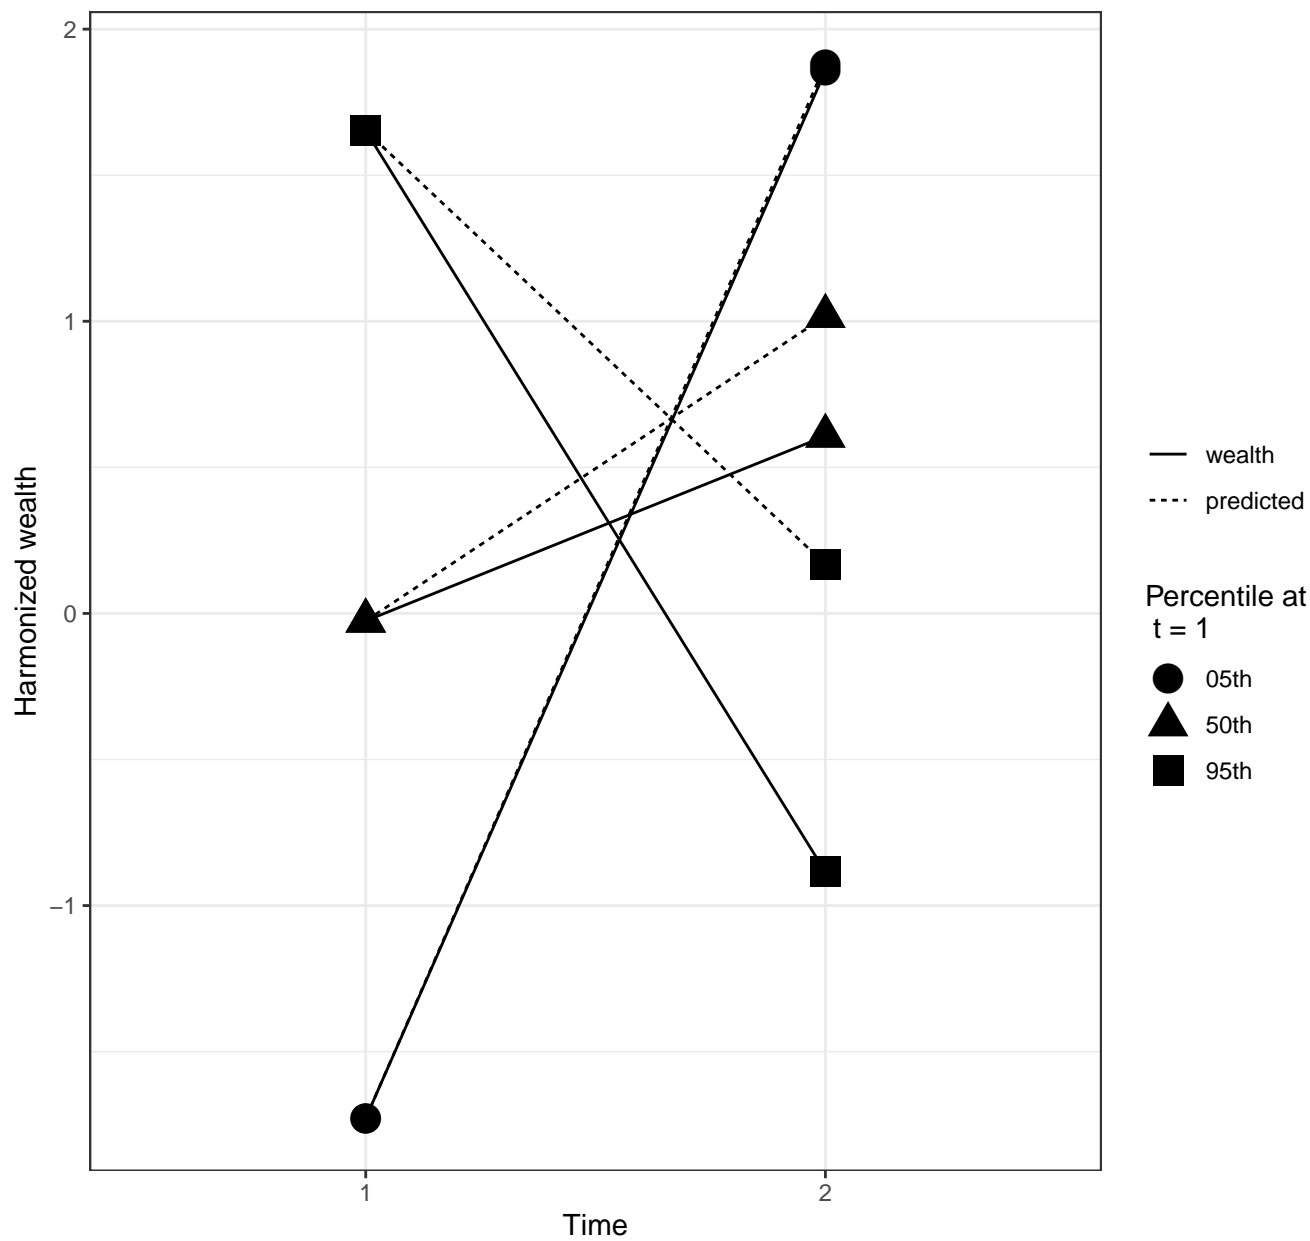

$w_2 = -1 + 0 \cdot w_1 + N(0, 0.5);$   
Variance at time 2: time 1 = 0.2

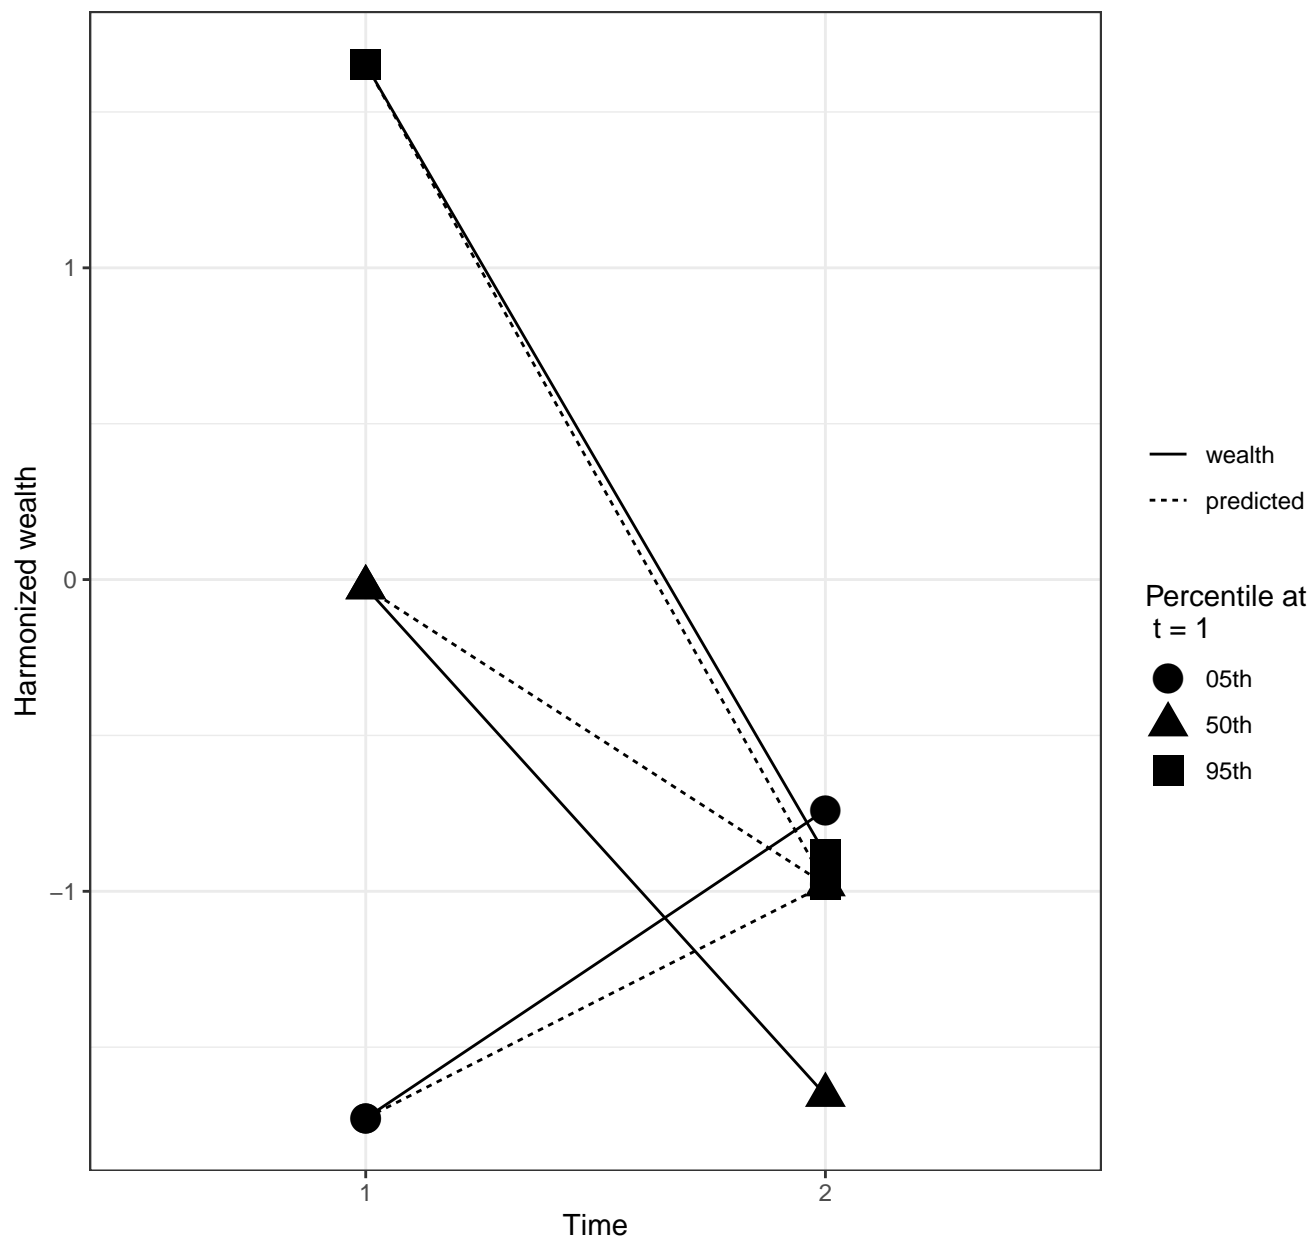

$w_2 = -0.5 + 0 \cdot w_1 + N(0, 0.5);$   
Variance at time 2: time 1 = 0.2

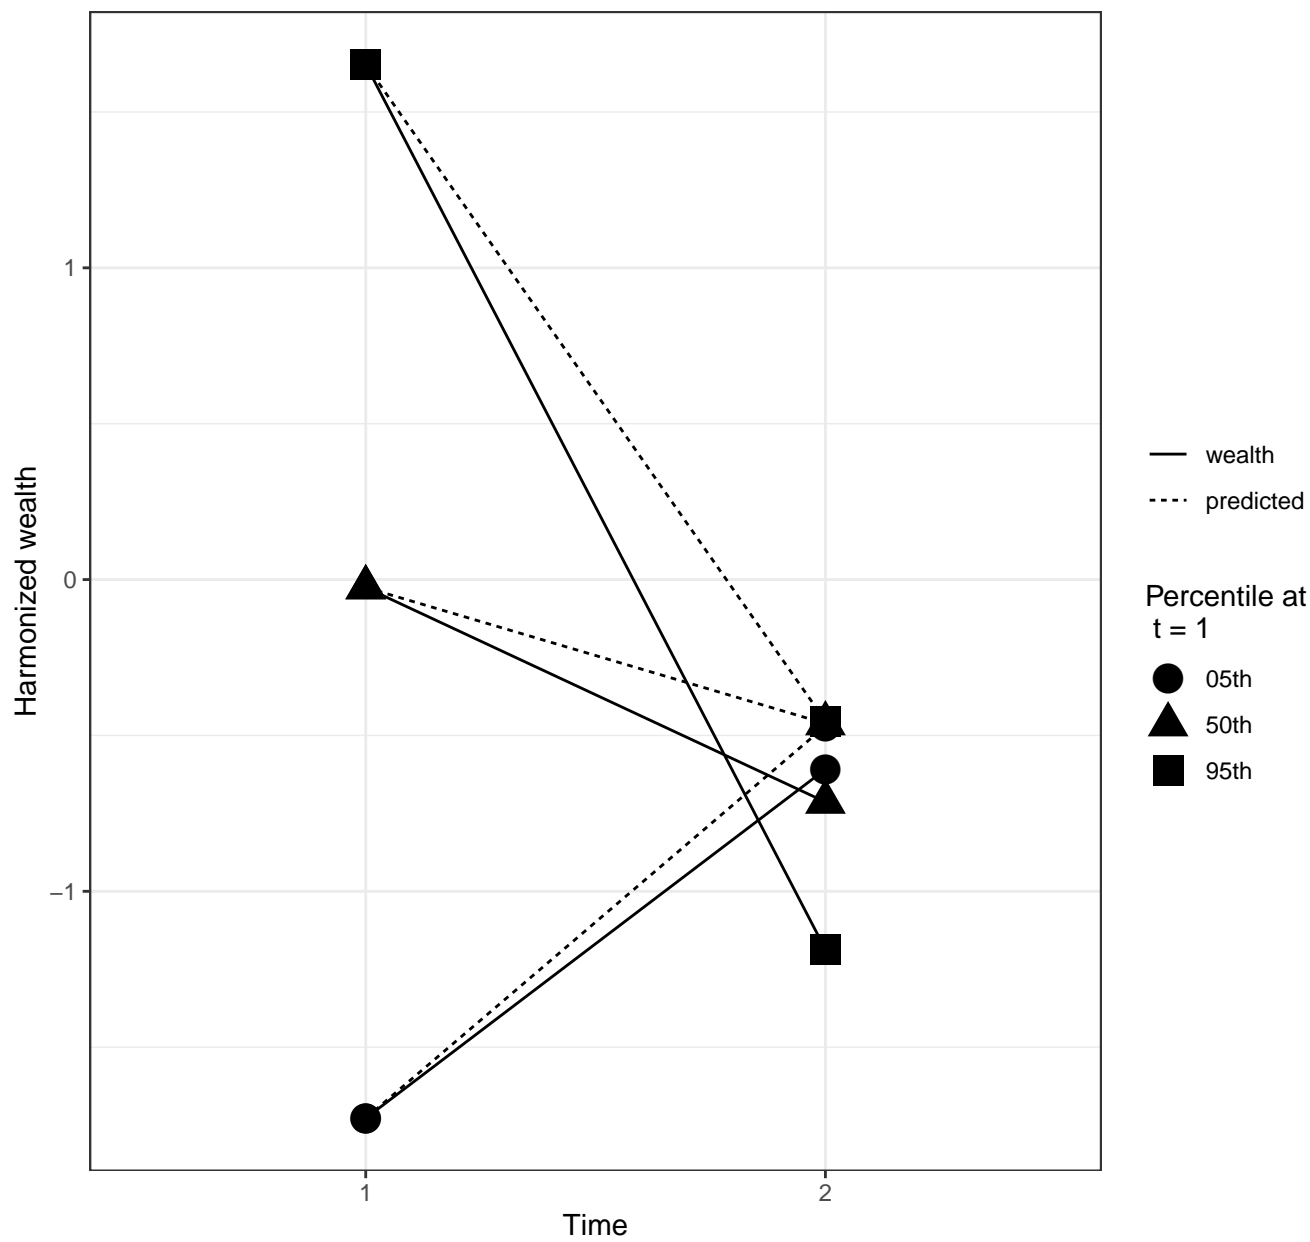

$w_2 = -0.3 + 0 \cdot w_1 + N(0, 0.5);$   
Variance at time 2: time 1 = 0.2

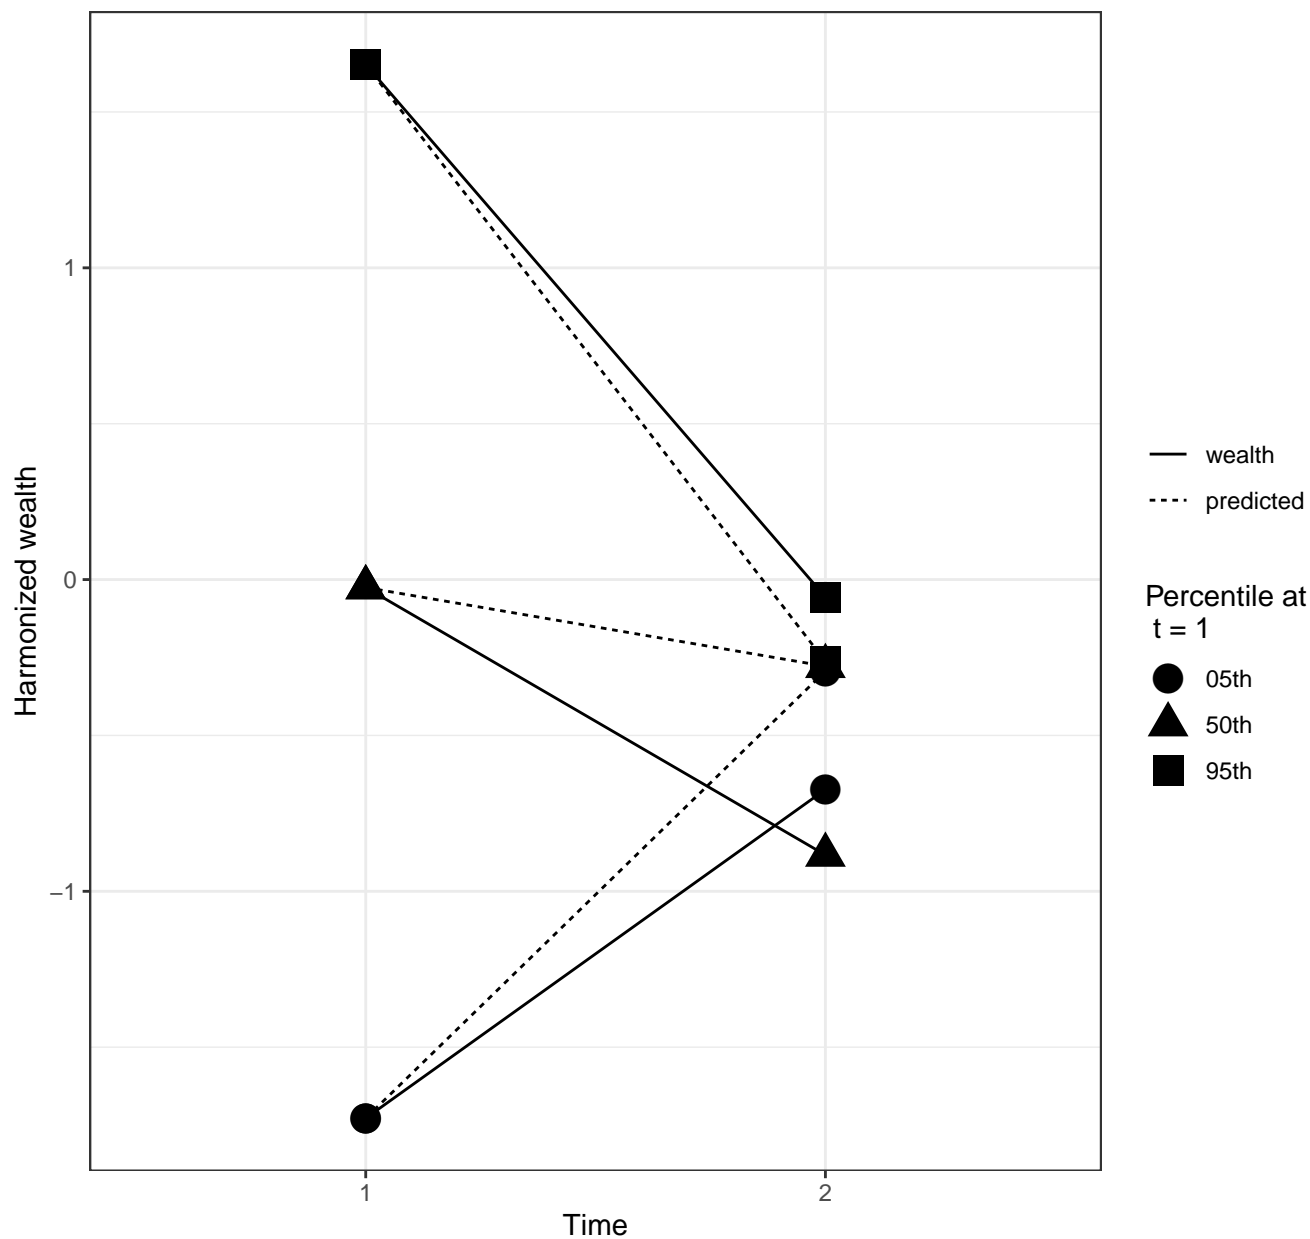

$w_2 = 0 + 0 \cdot w_1 + N(0, 0.5);$   
Variance at time 2: time 1 = 0.2

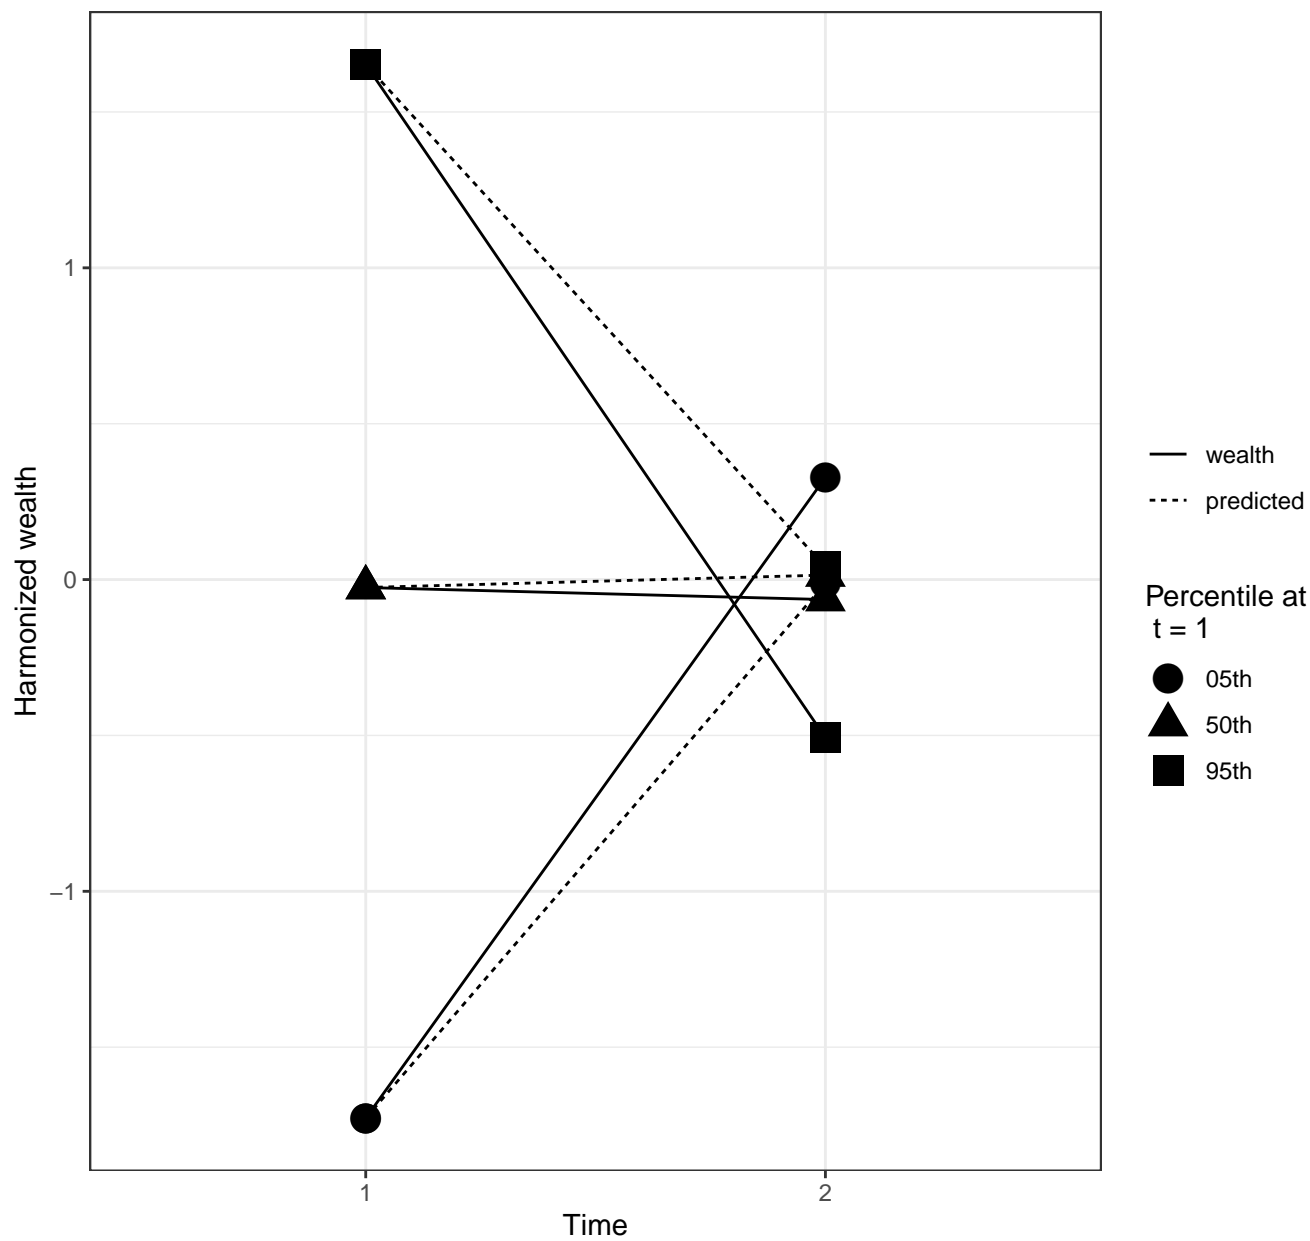

$w_2 = 0.3 + 0 \cdot w_1 + N(0, 0.5);$   
Variance at time 2: time 1 = 0.2

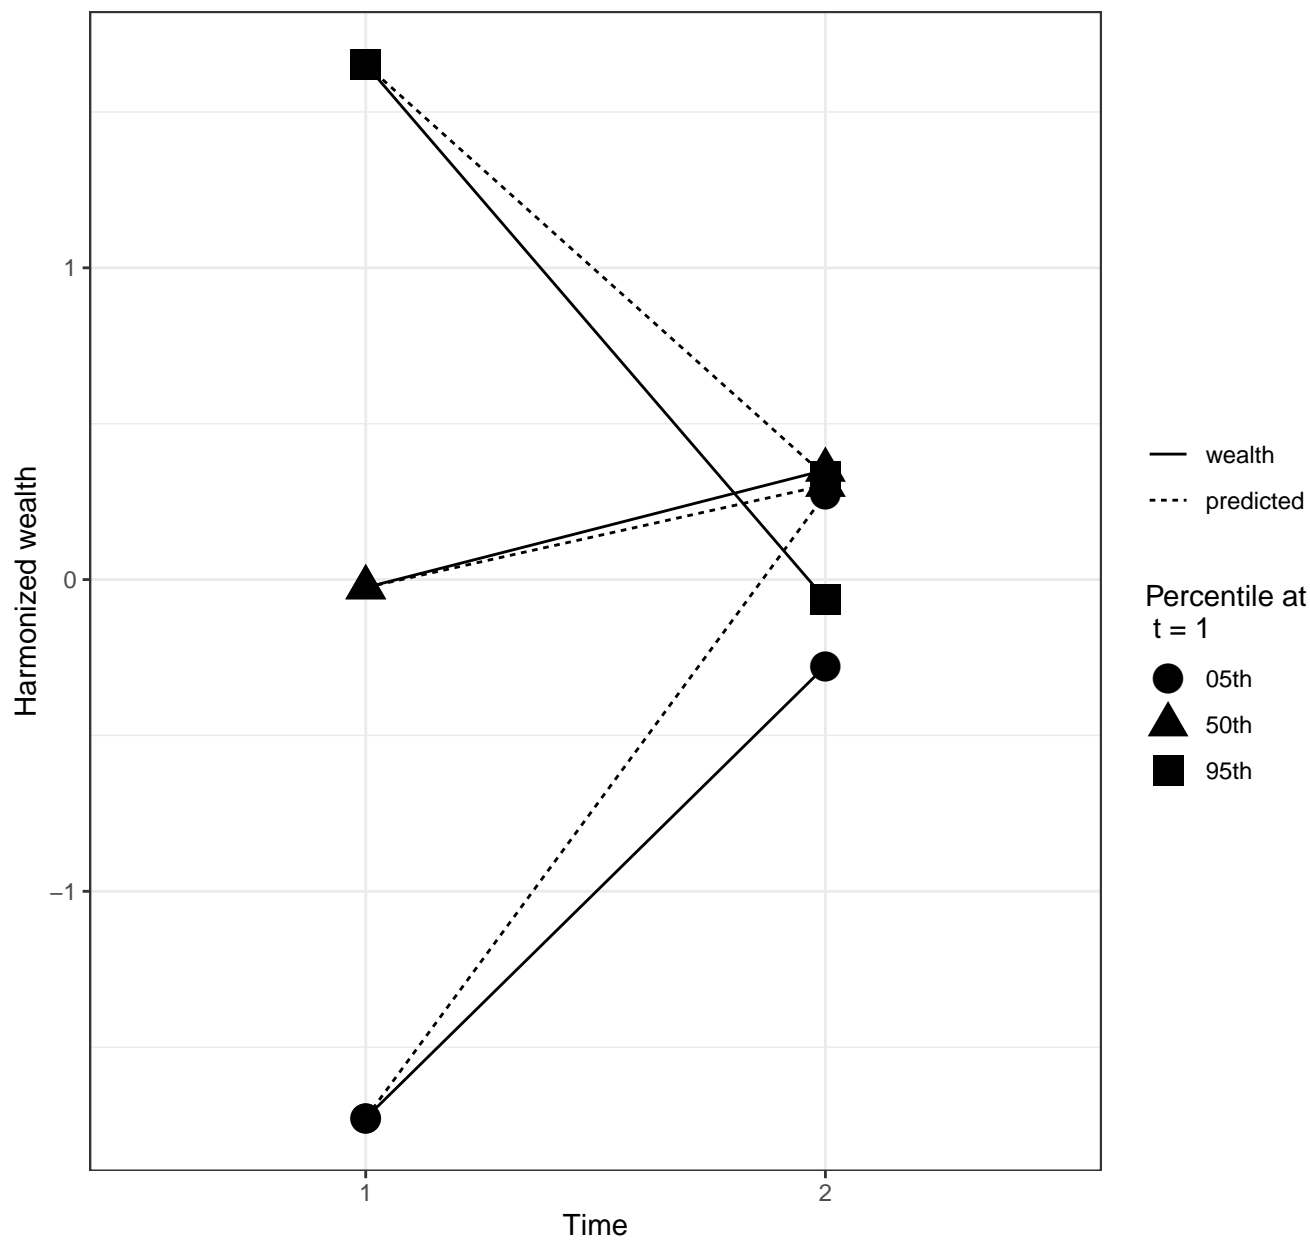

$w_2 = 0.5 + 0 \cdot w_1 + N(0, 0.5);$   
Variance at time 2: time 1 = 0.2

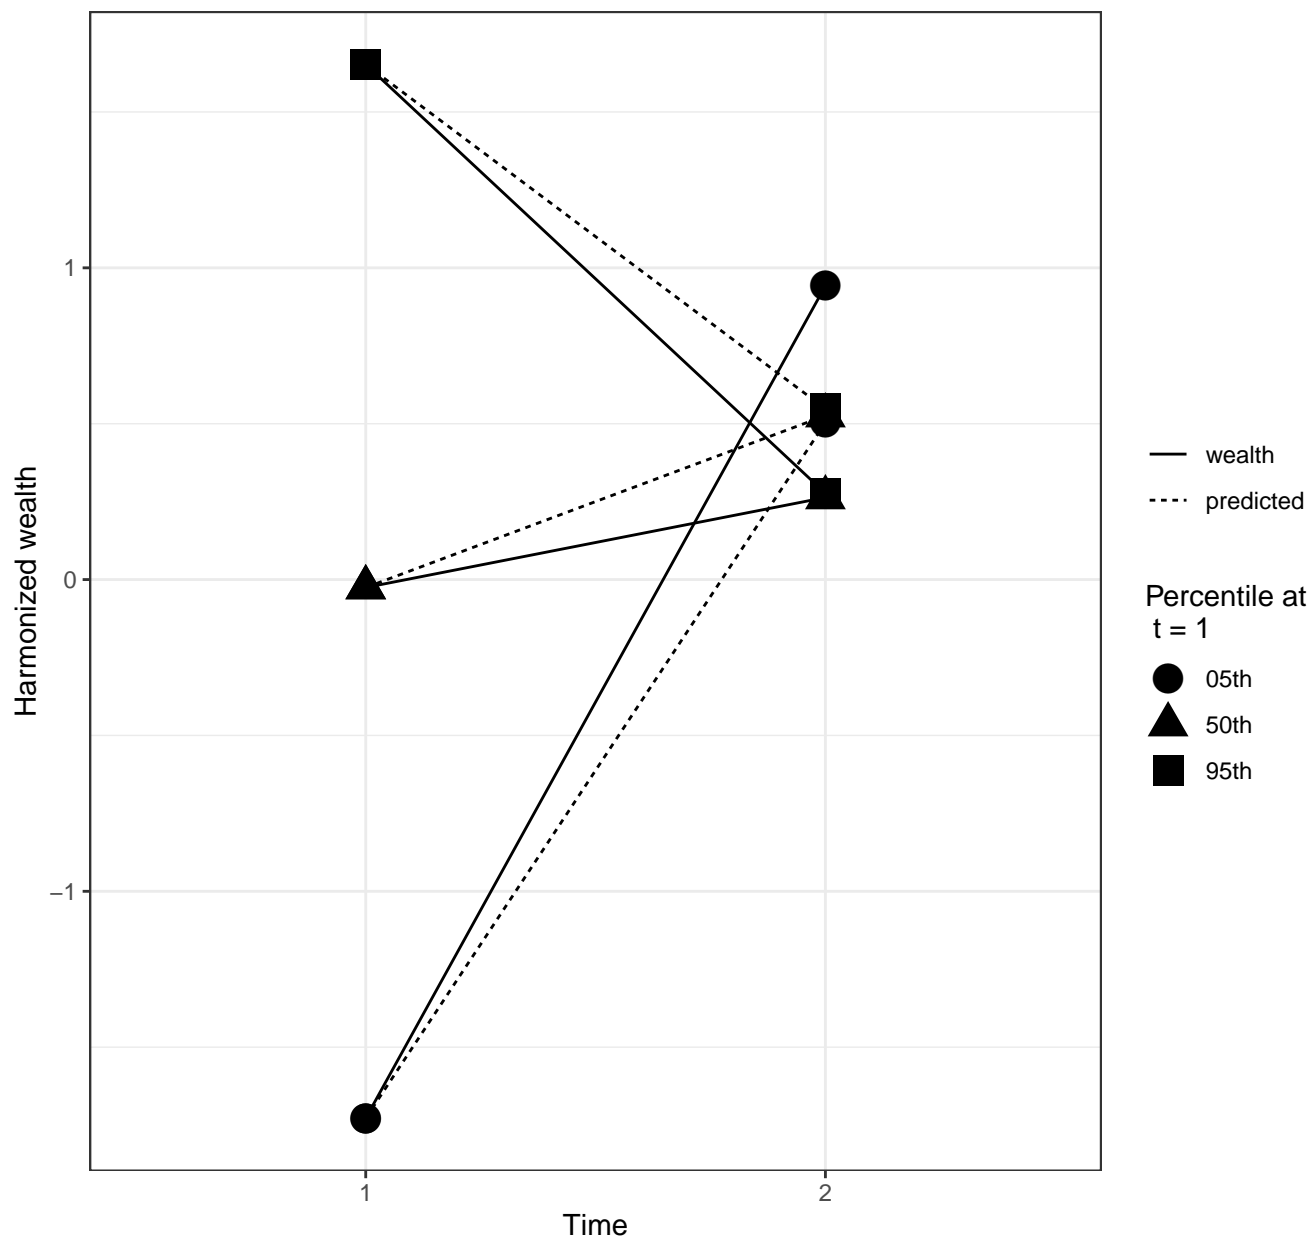

$w_2 = 1 + 0 \cdot w_1 + N(0, 0.5);$   
Variance at time 2: time 1 = 0.3

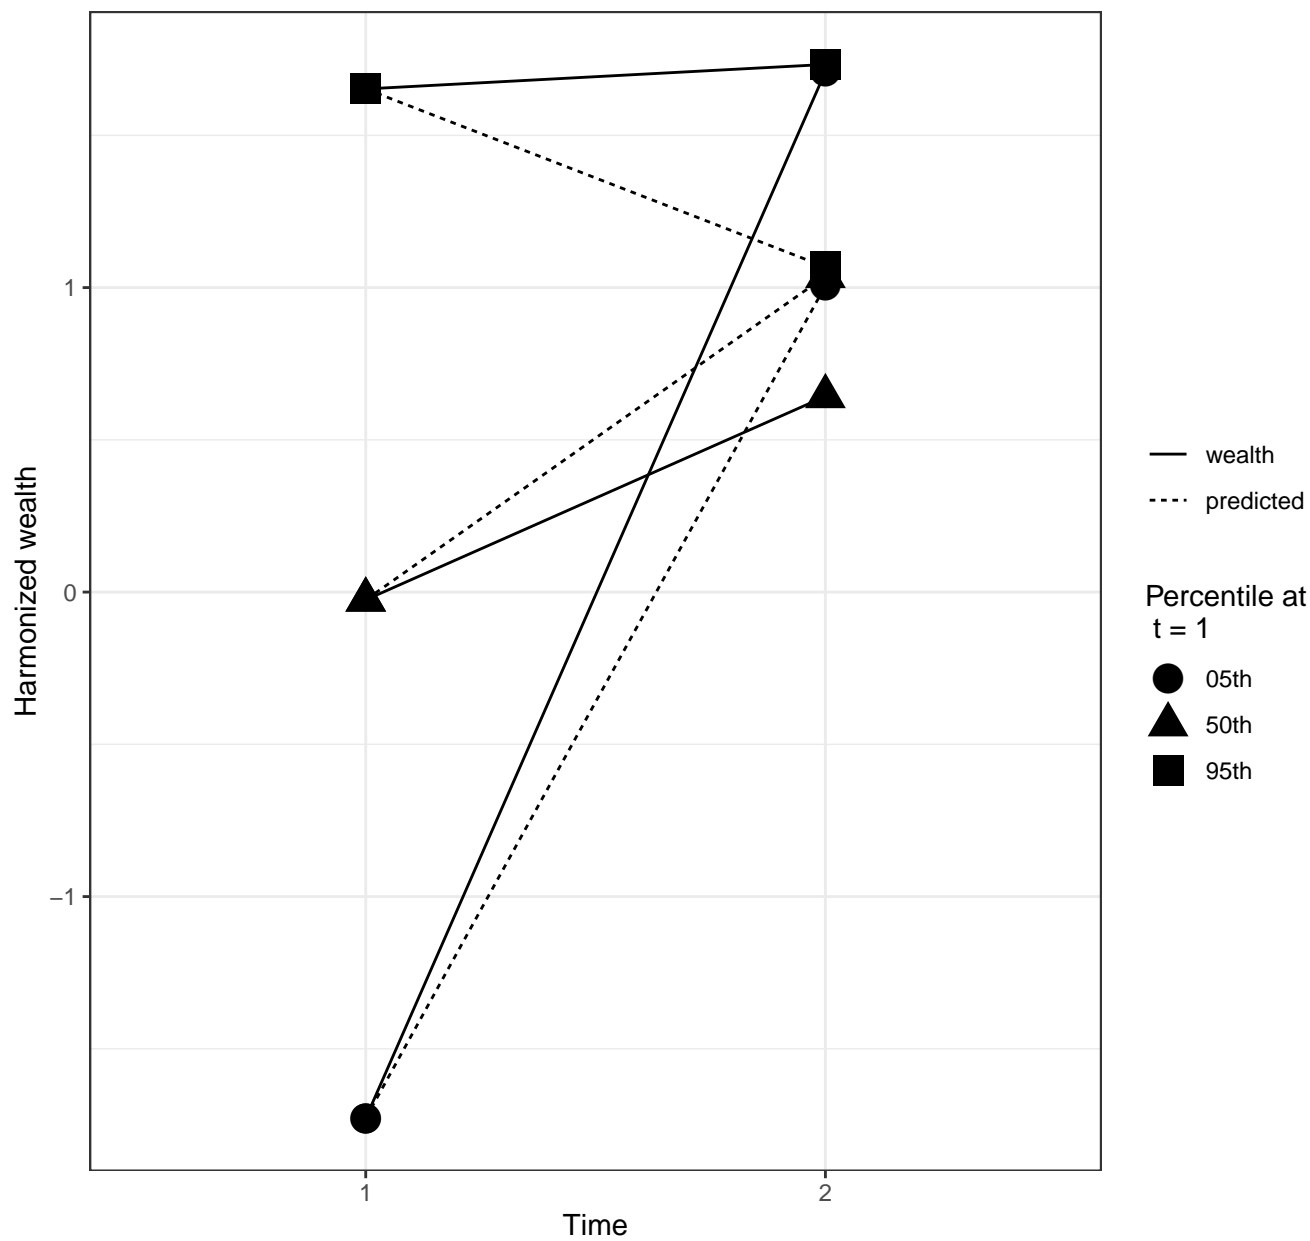



$w_2 = -1 + 0.5 \cdot w_1 + N(0, 0.5);$   
Variance at time 2: time 1 = 0.5

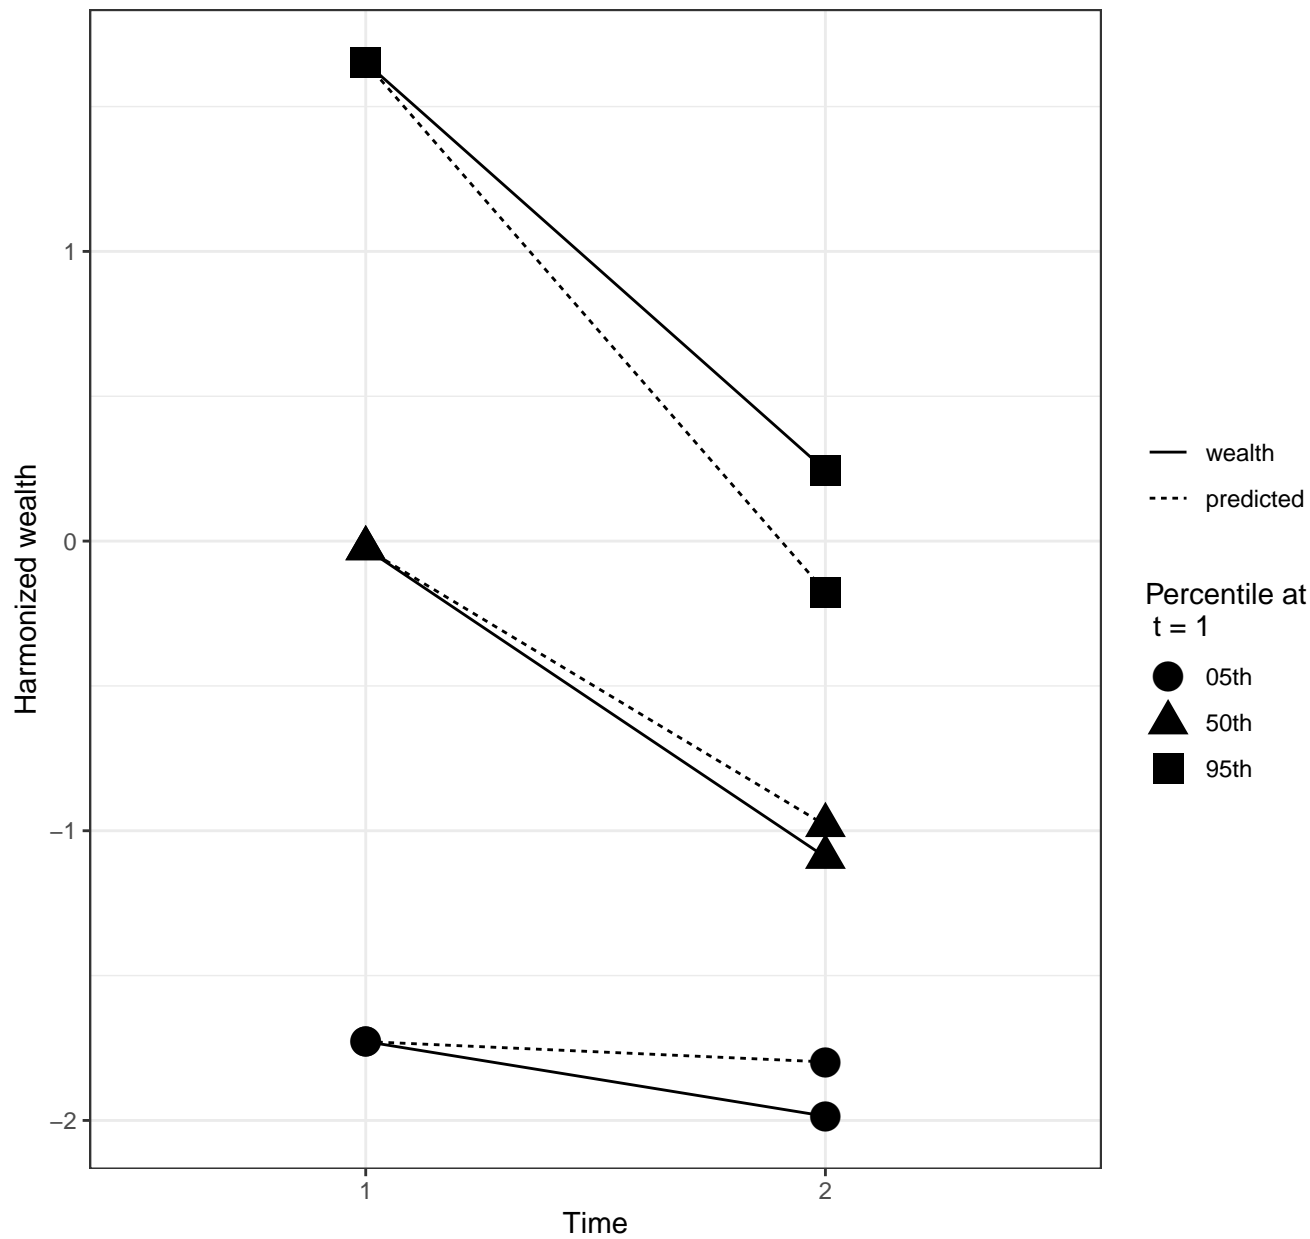

$w_2 = -0.5 + 0.5 \cdot w_1 + N(0, 0.5);$   
Variance at time 2: time 1 = 0.5

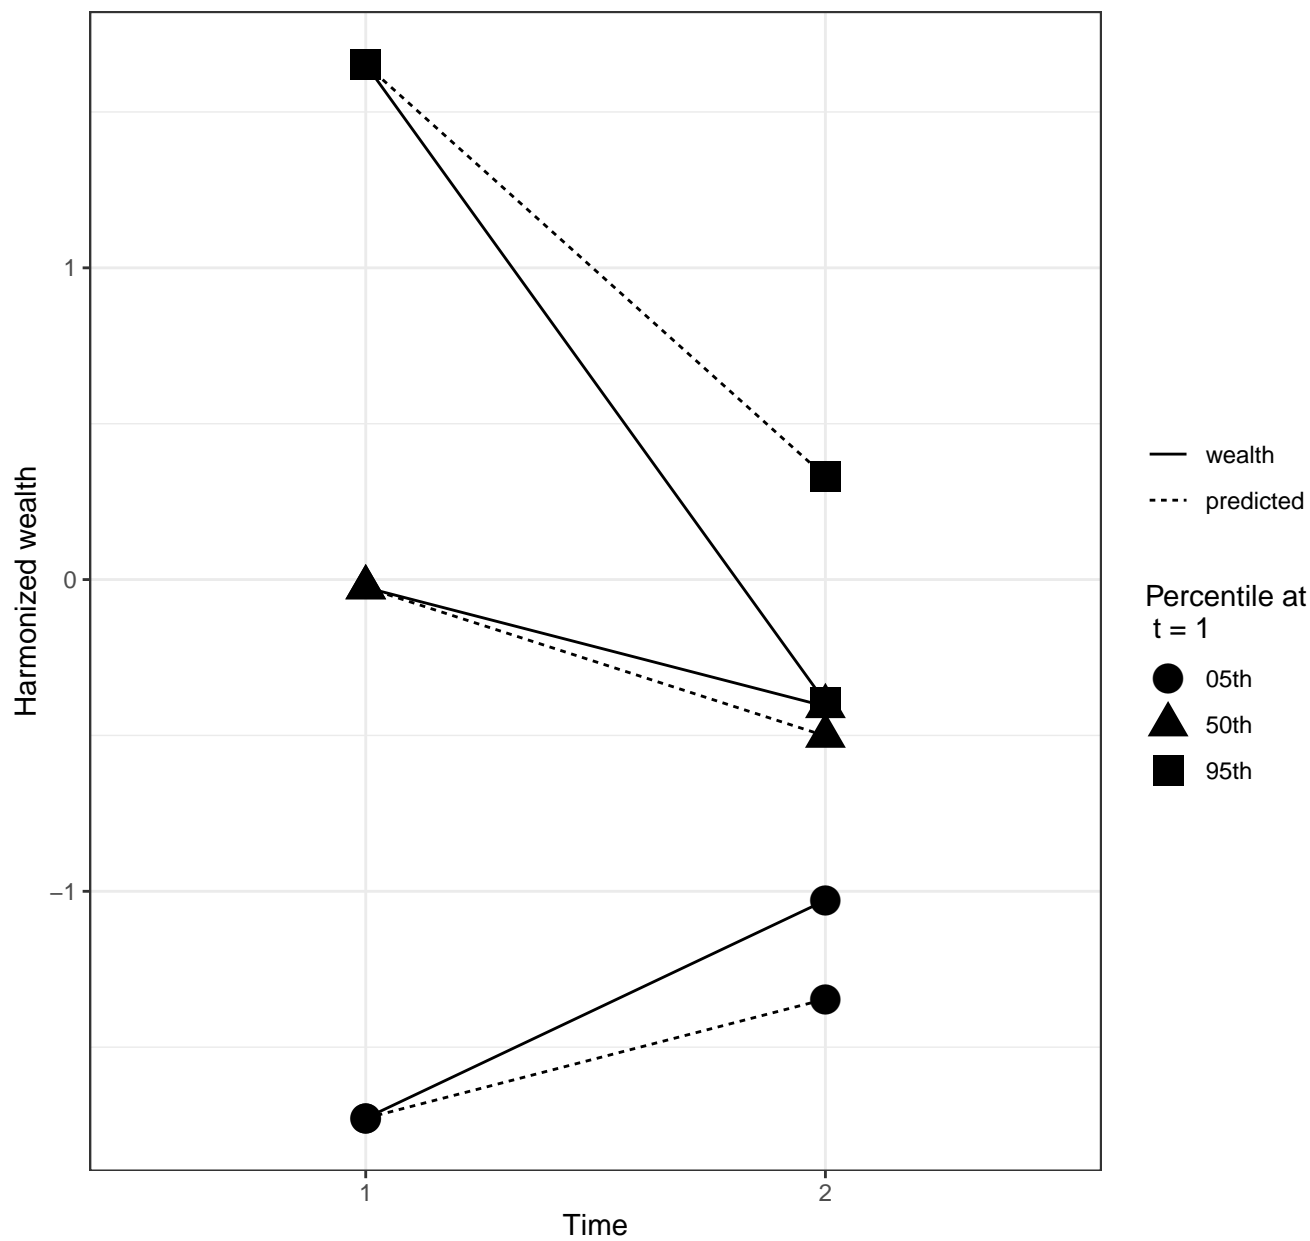

$w_2 = -0.3 + 0.5 \cdot w_1 + N(0, 0.5);$   
Variance at time 2: time 1 = 0.5

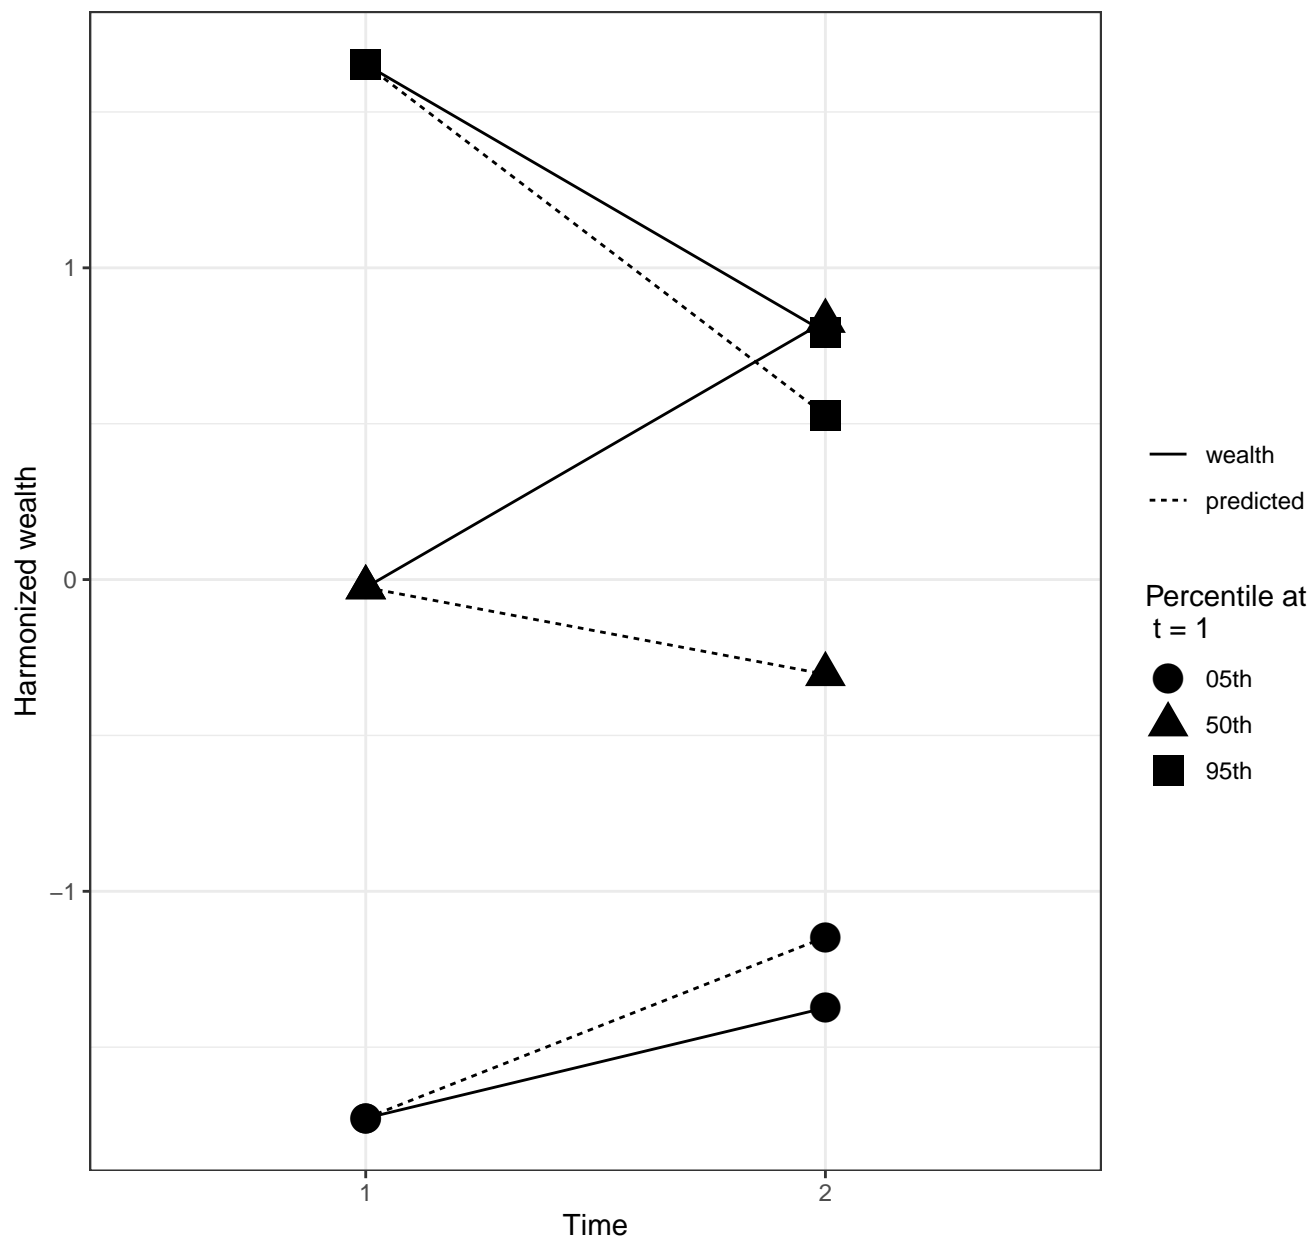

$w_2 = 0 + 0.5 \cdot w_1 + N(0, 0.5);$   
Variance at time 2: time 1 = 0.5

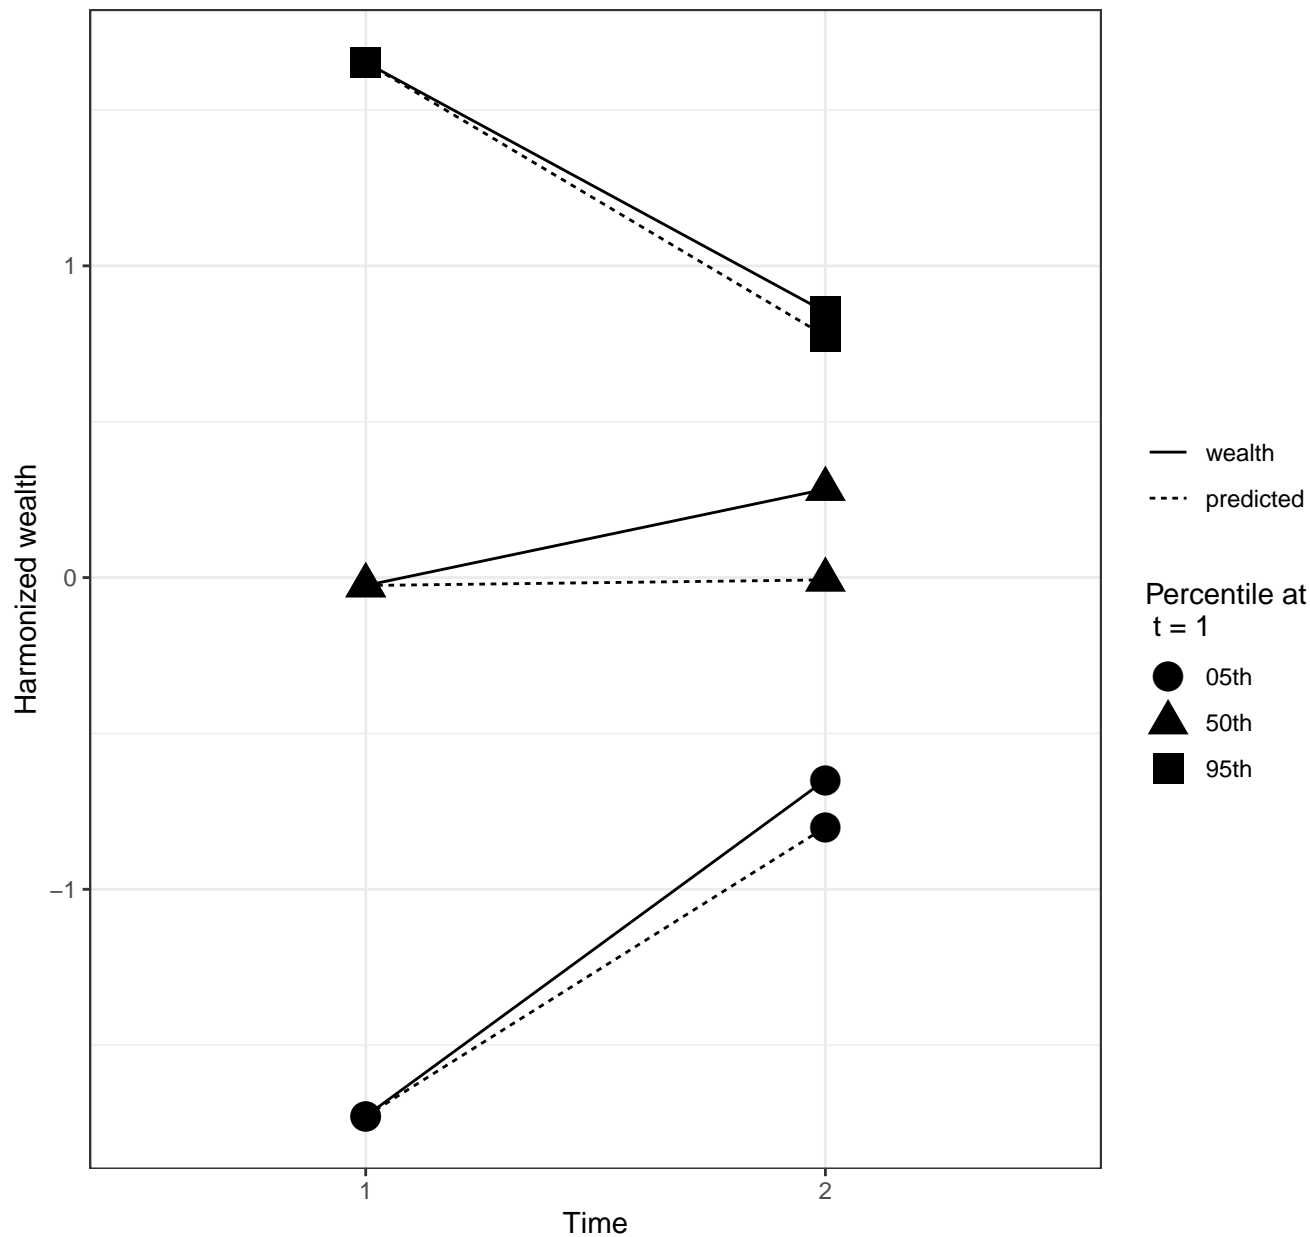

$w_2 = 0.3 + 0.5 \cdot w_1 + N(0, 0.5);$   
Variance at time 2: time 1 = 0.5

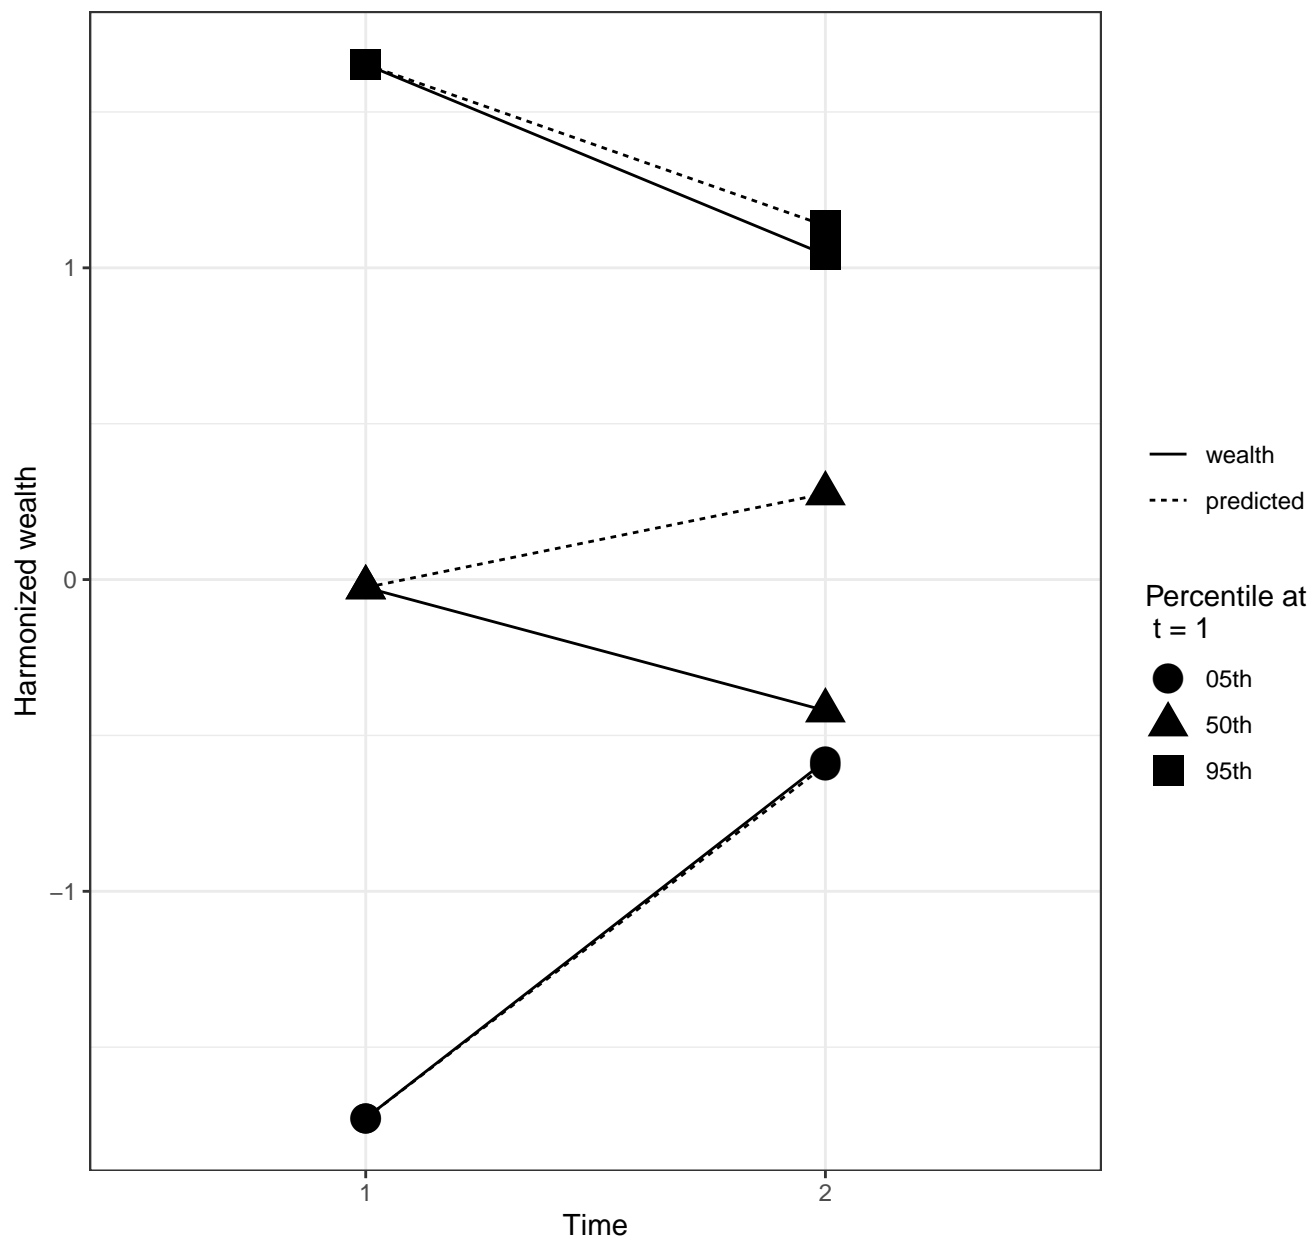

$w_2 = 0.5 + 0.5 \cdot w_1 + N(0, 0.5);$   
Variance at time 2: time 1 = 0.6

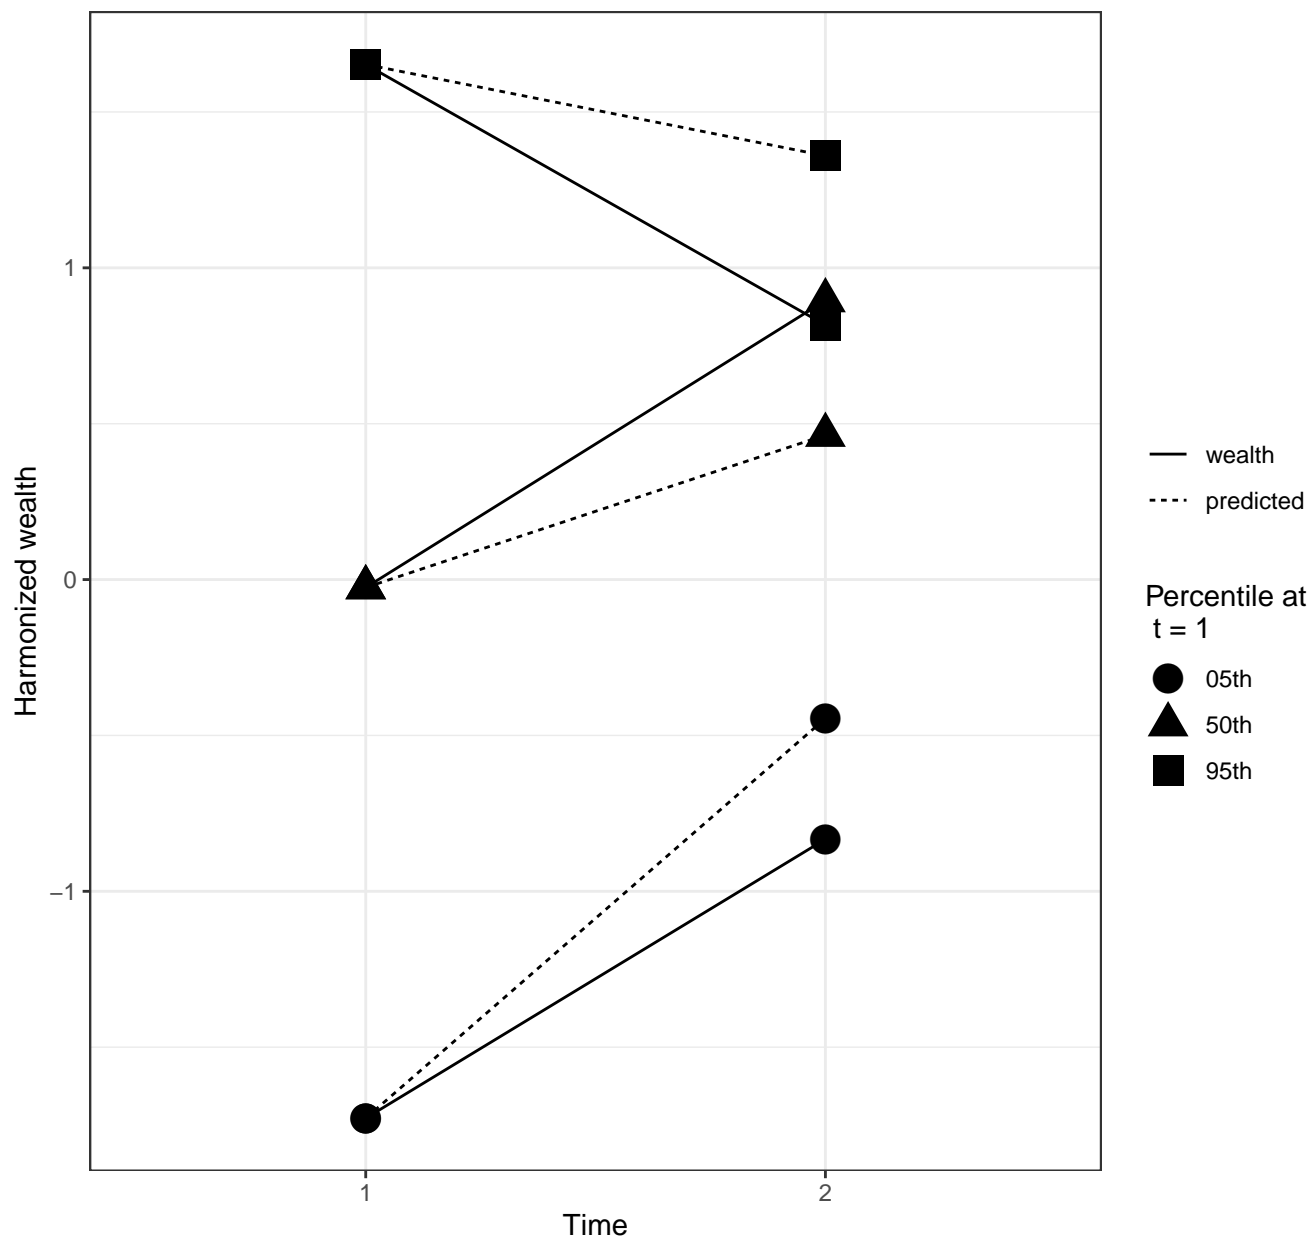

$w_2 = 1 + 0.5 \cdot w_1 + N(0, 0.5);$   
Variance at time 2: time 1 = 0.5

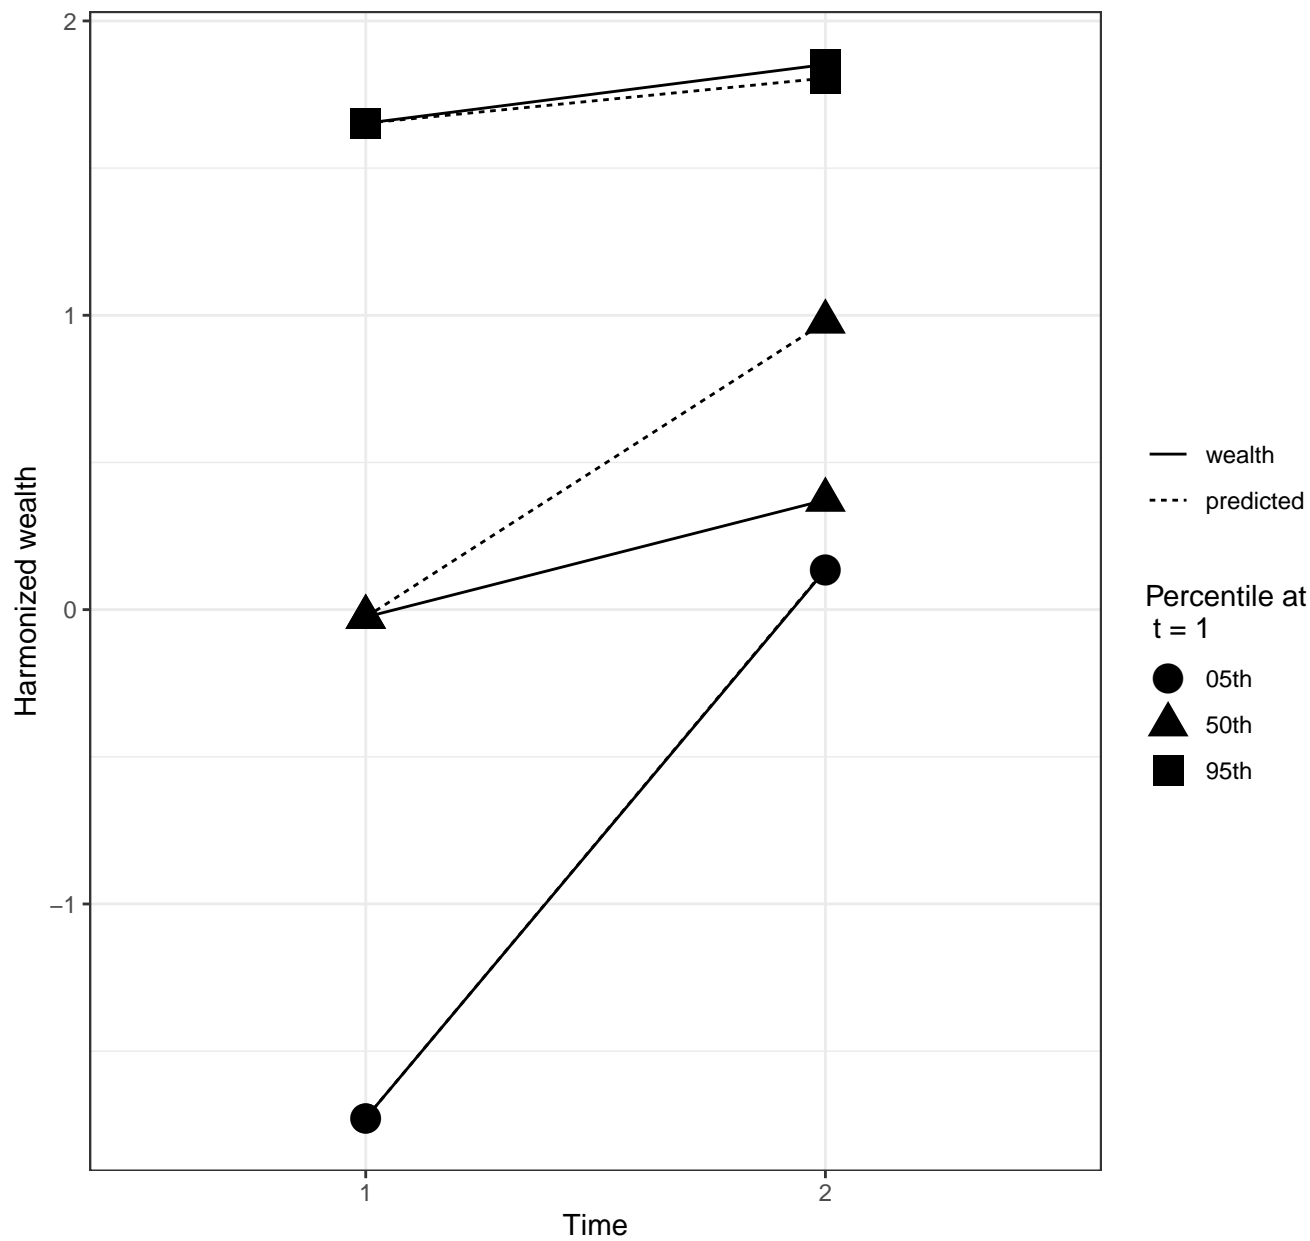

$w_2 = -1 + 1 \cdot w_1 + N(0, 0.5);$   
Variance at time 2: time 1 = 1.2

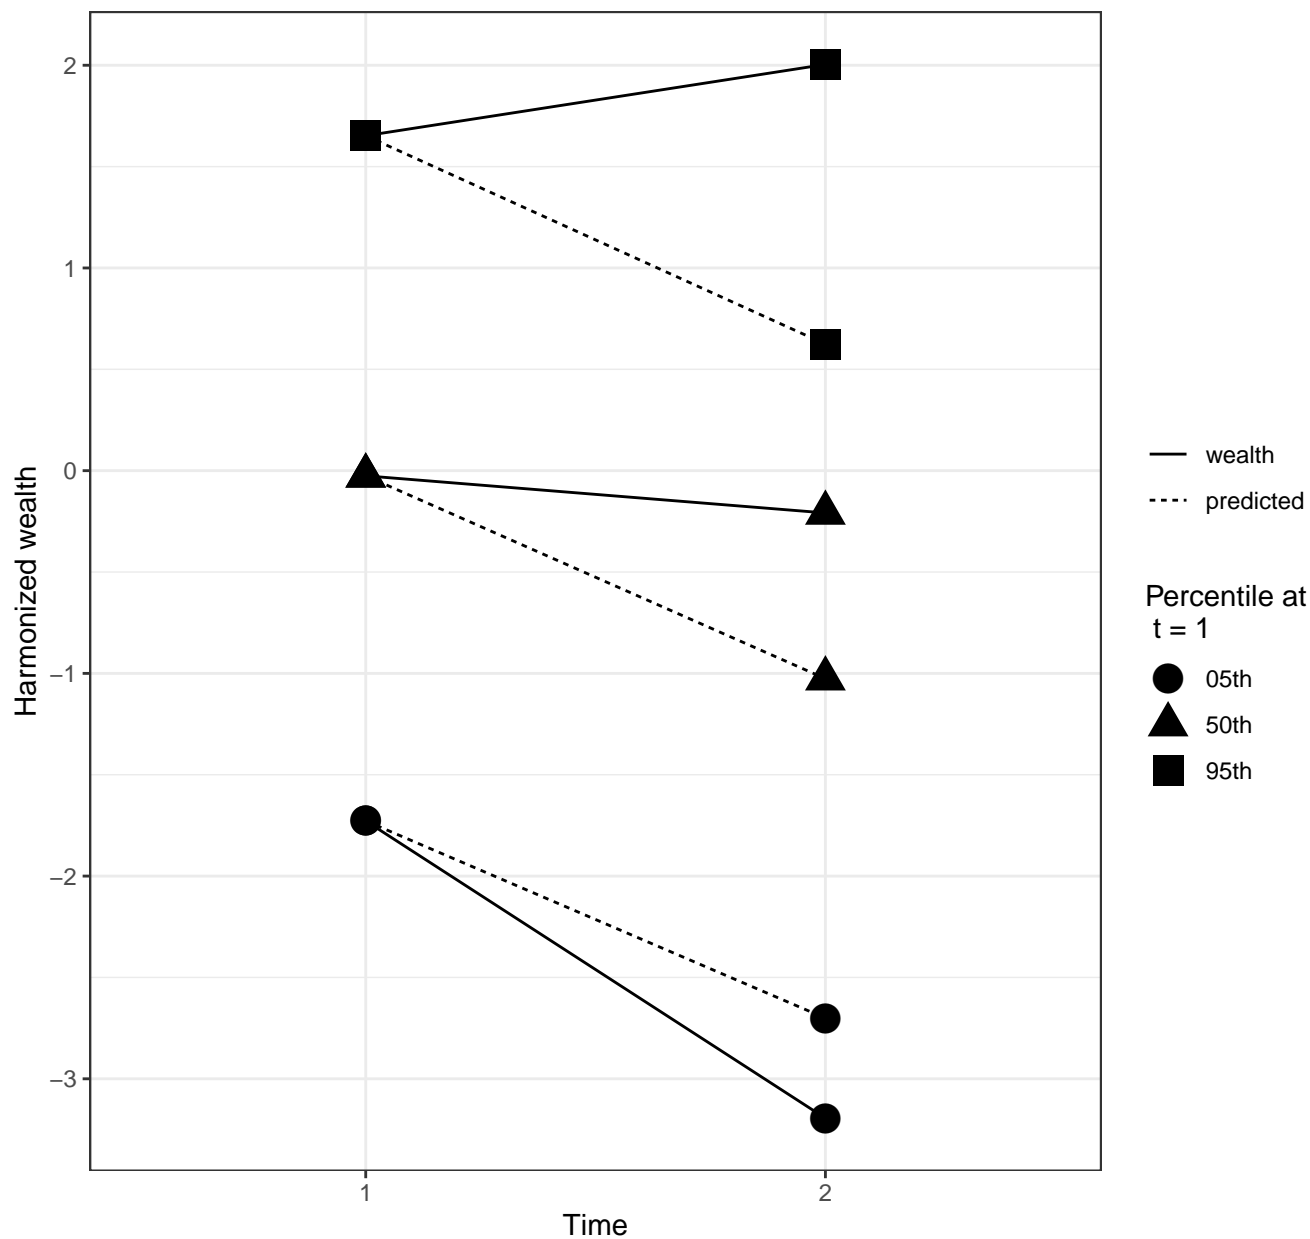



$w_2 = -0.5 + 1 \cdot w_1 + N(0, 0.5);$   
Variance at time 2: time 1 = 1.3

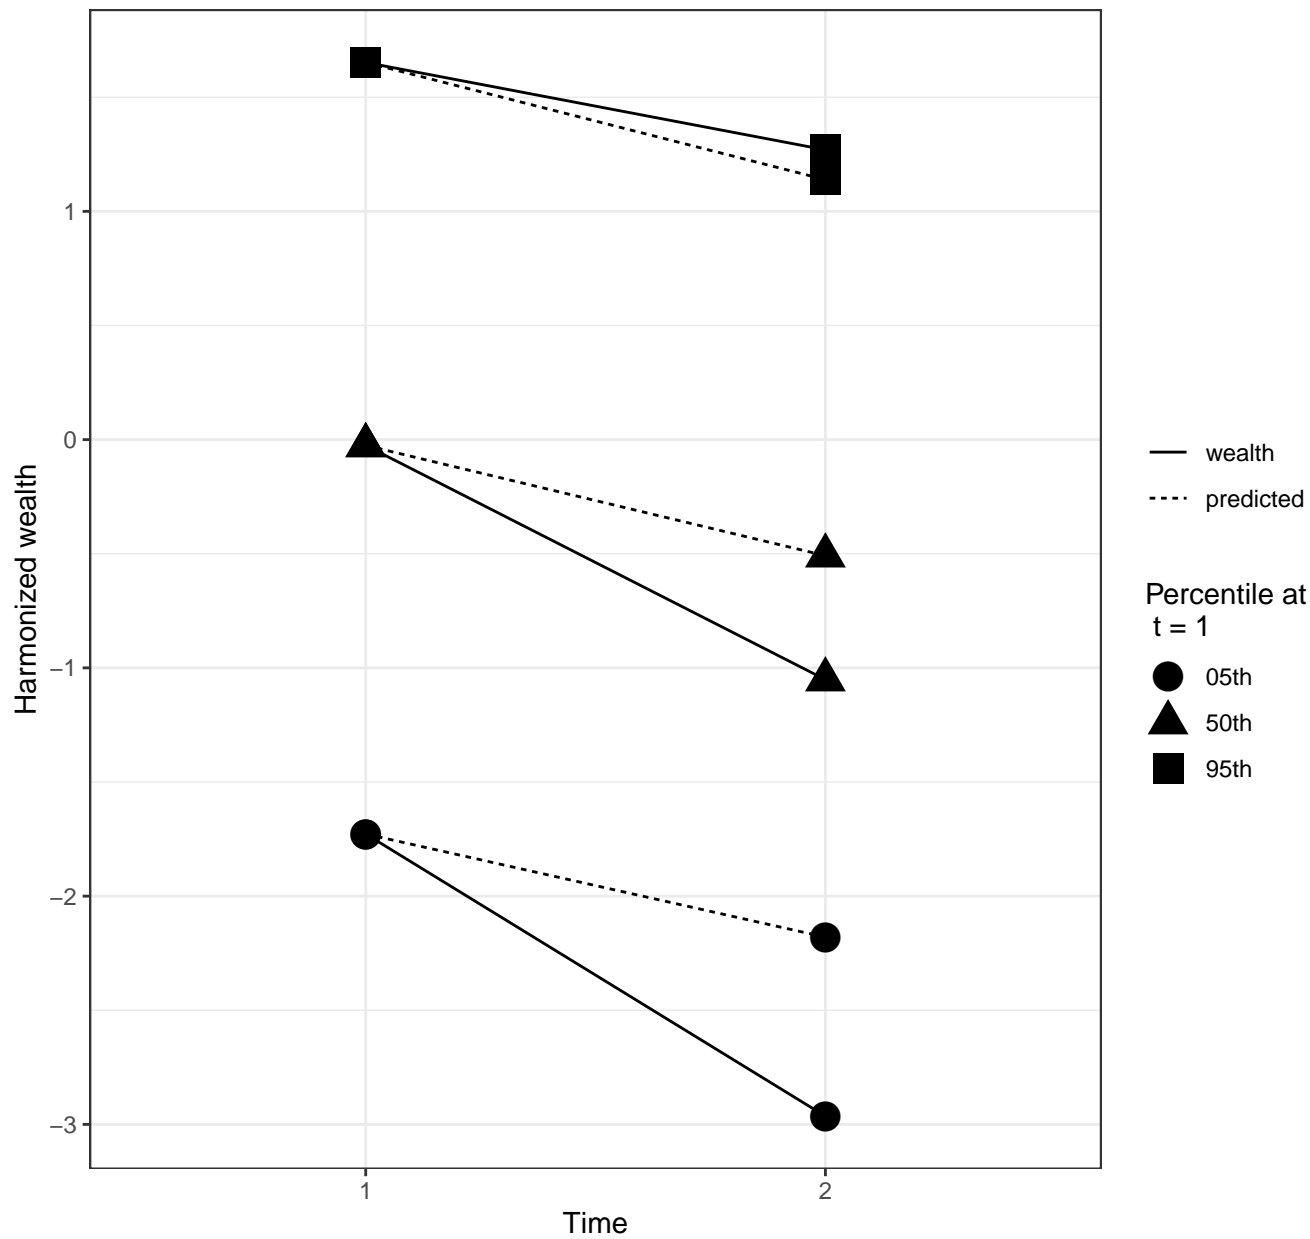

$w_2 = -0.3 + 1 \cdot w_1 + N(0, 0.5);$   
Variance at time 2: time 1 = 1.3

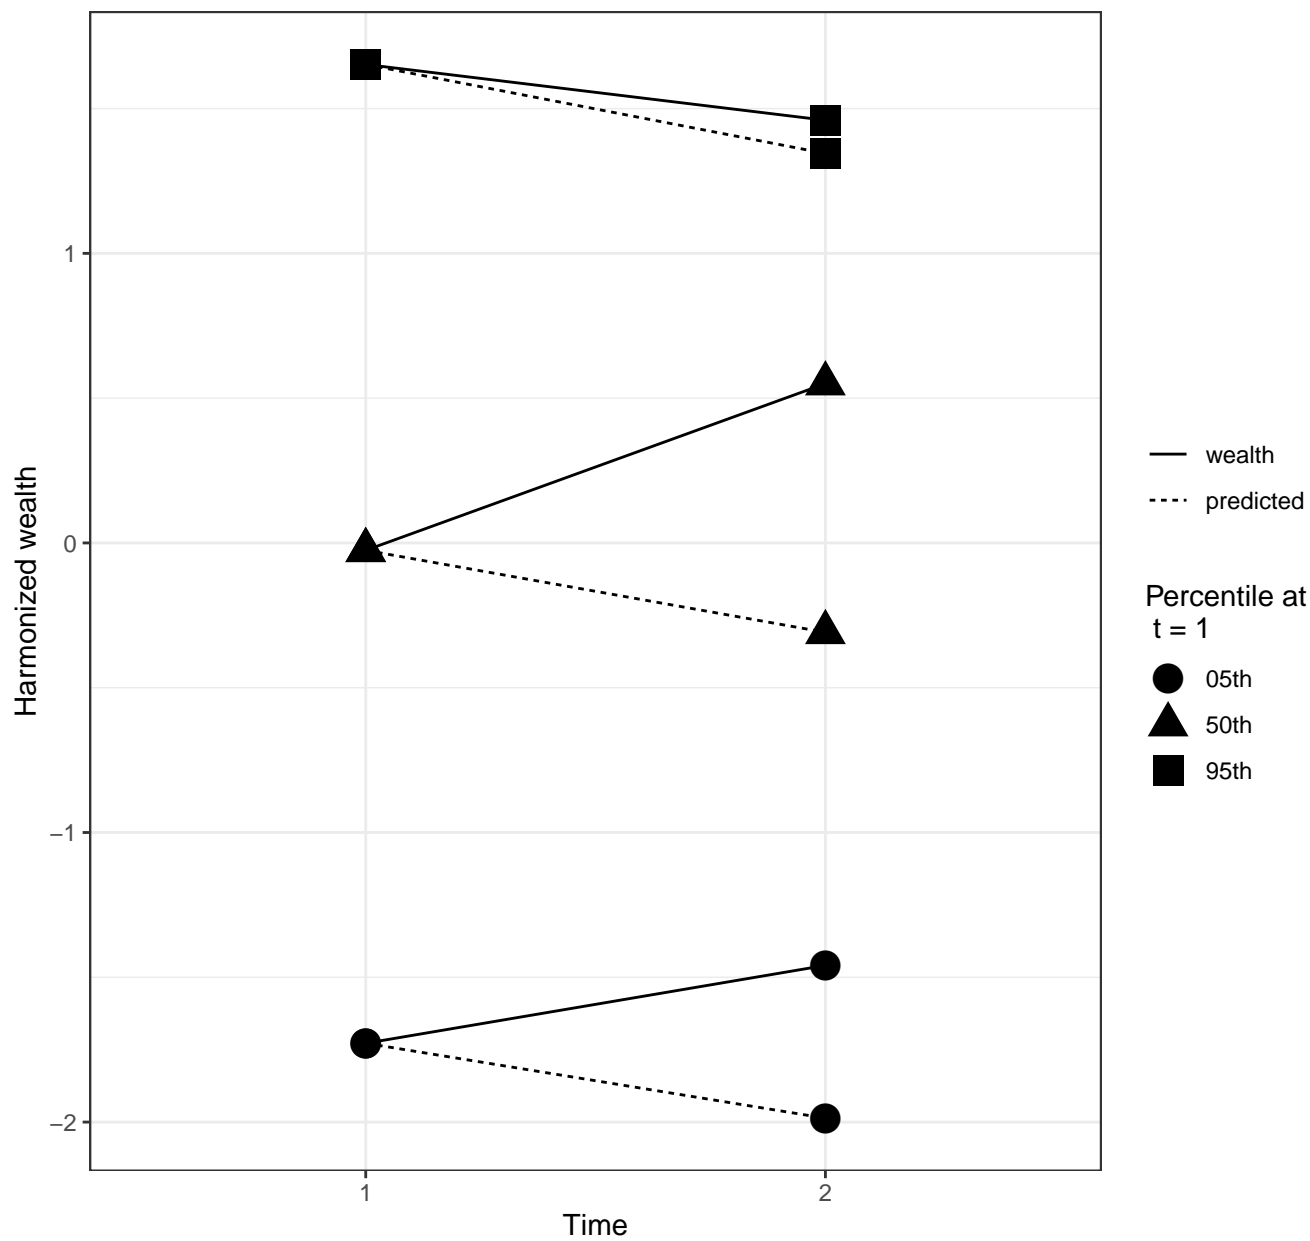

$w_2 = 0 + 1 \cdot w_1 + N(0, 0.5);$   
Variance at time 2: time 1 = 1.3

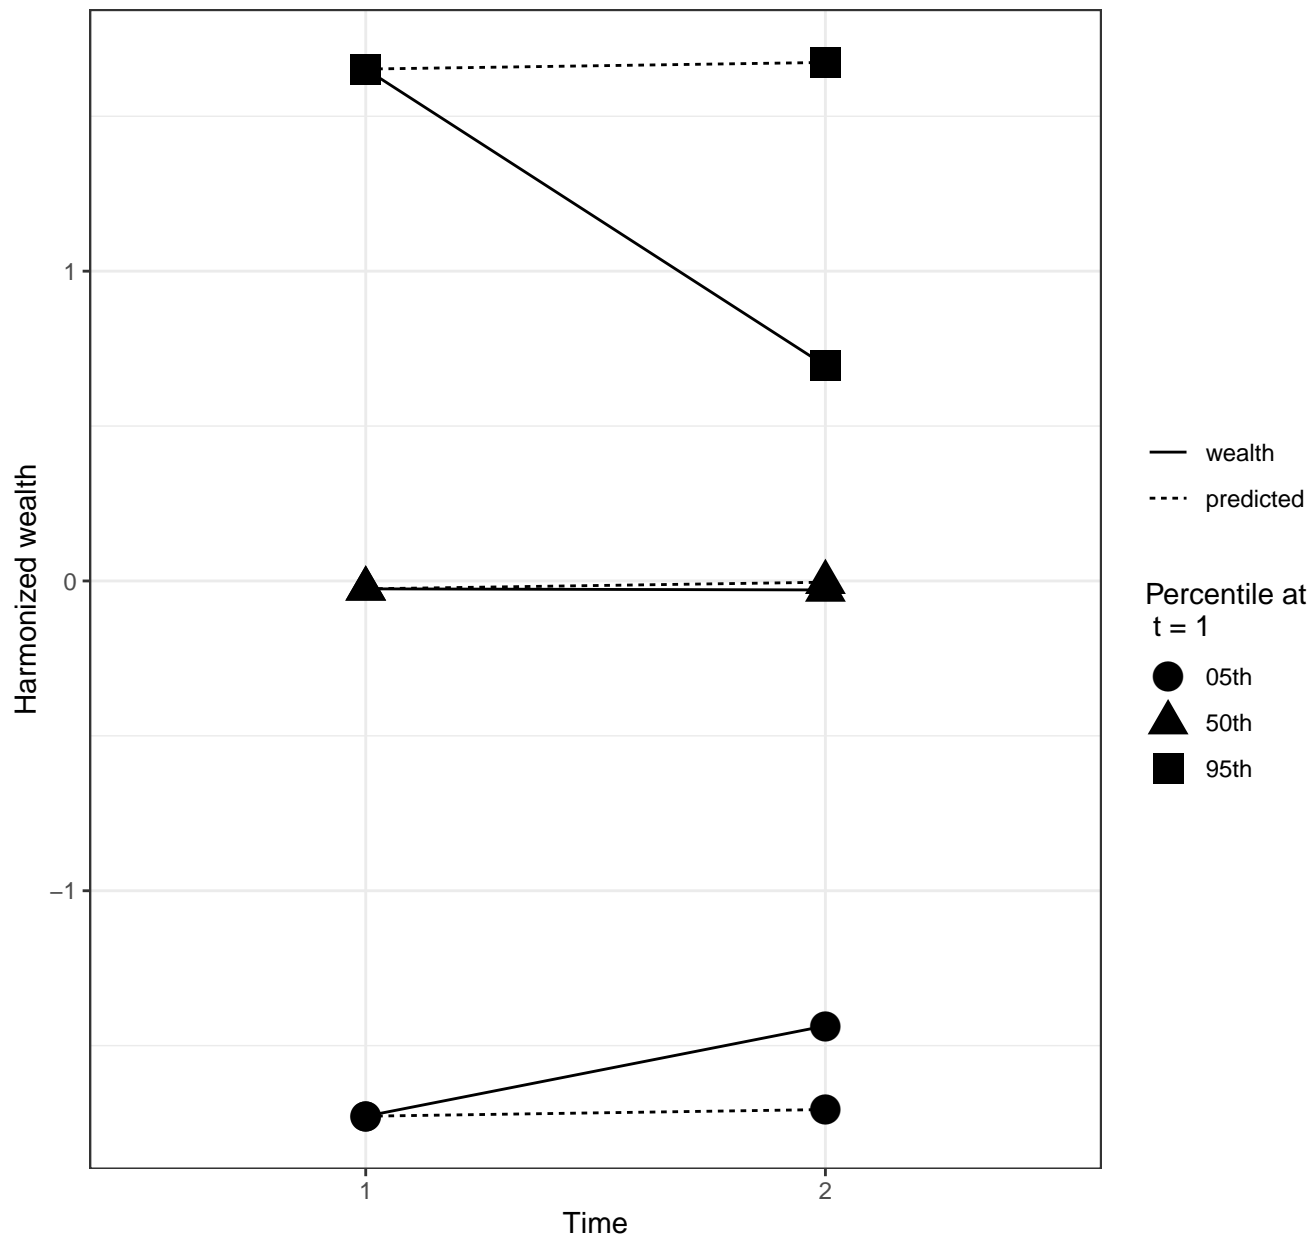

$w_2 = 0.3 + 1 \cdot w_1 + N(0, 0.5);$   
Variance at time 2: time 1 = 1.3

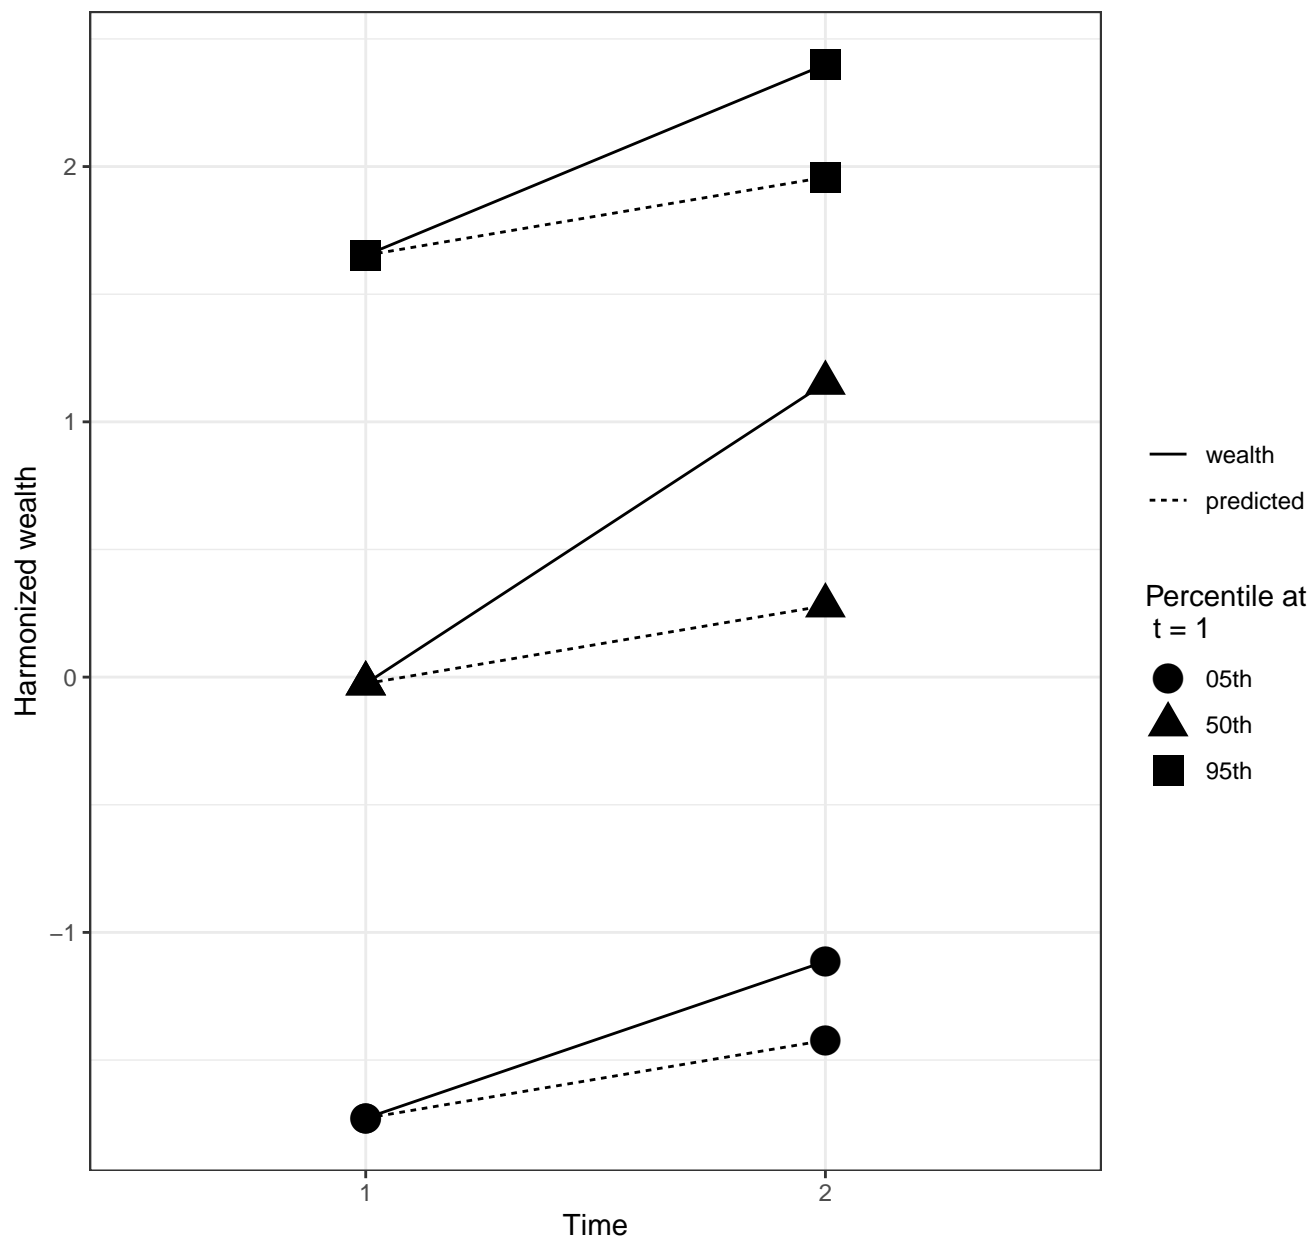

$w_2 = 0.5 + 1 \cdot w_1 + N(0, 0.5);$   
Variance at time 2: time 1 = 1.3

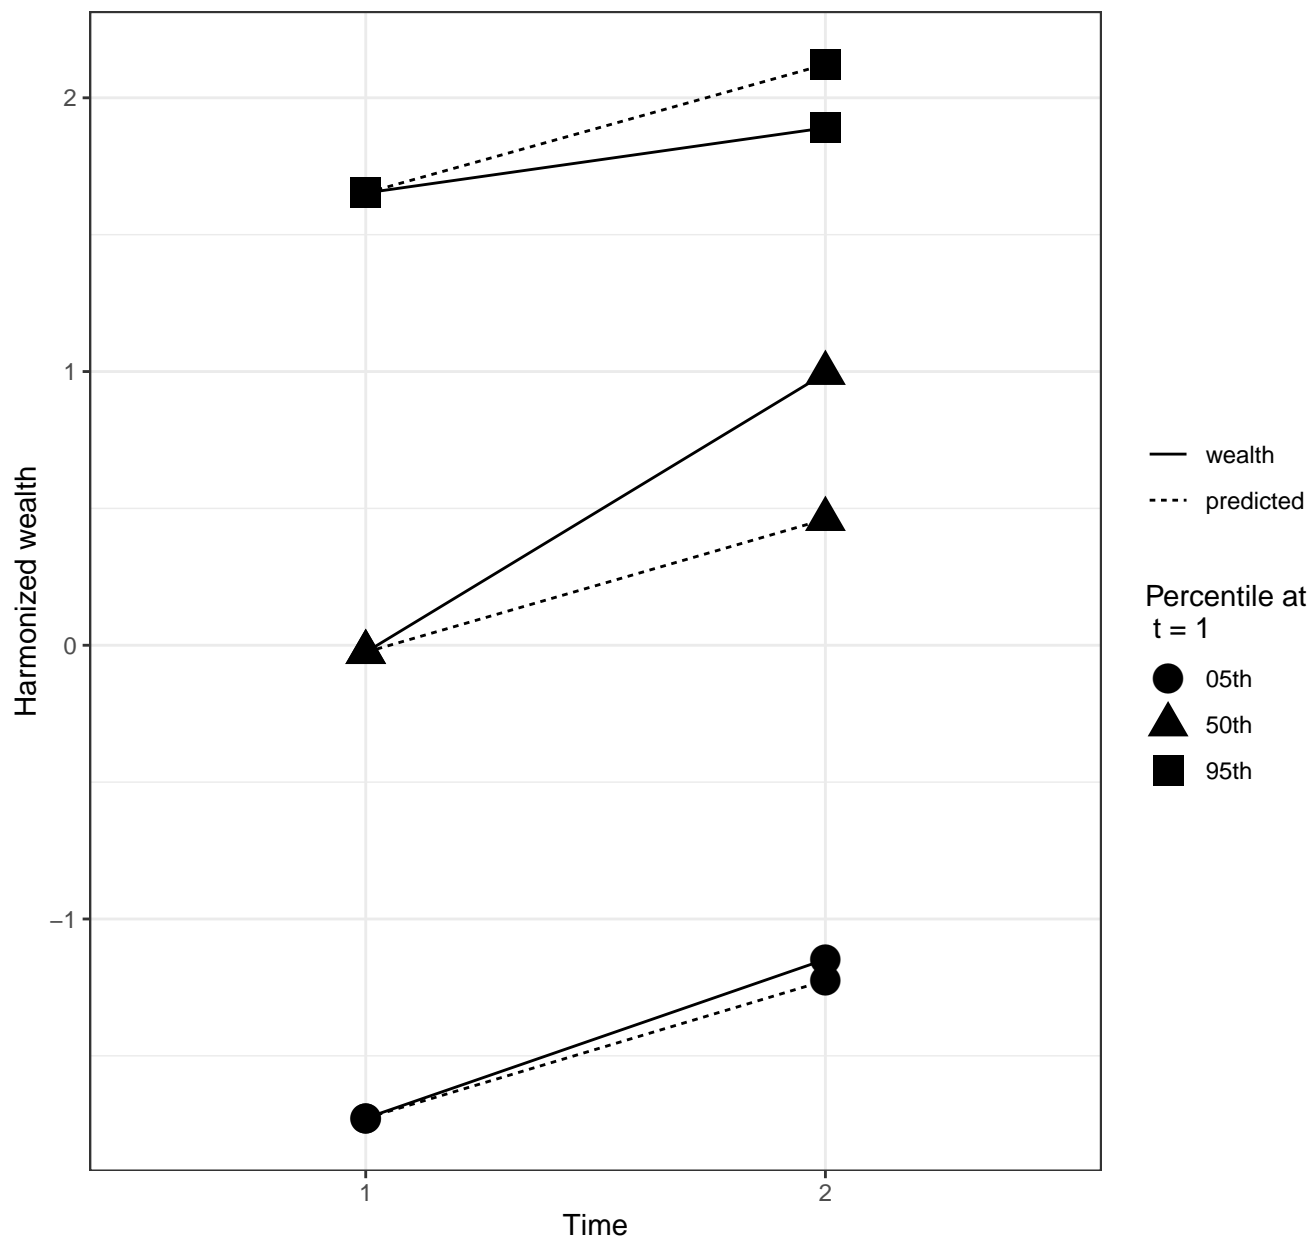

$w_2 = 1 + 1 \cdot w_1 + N(0, 0.5);$   
Variance at time 2: time 1 = 1.3

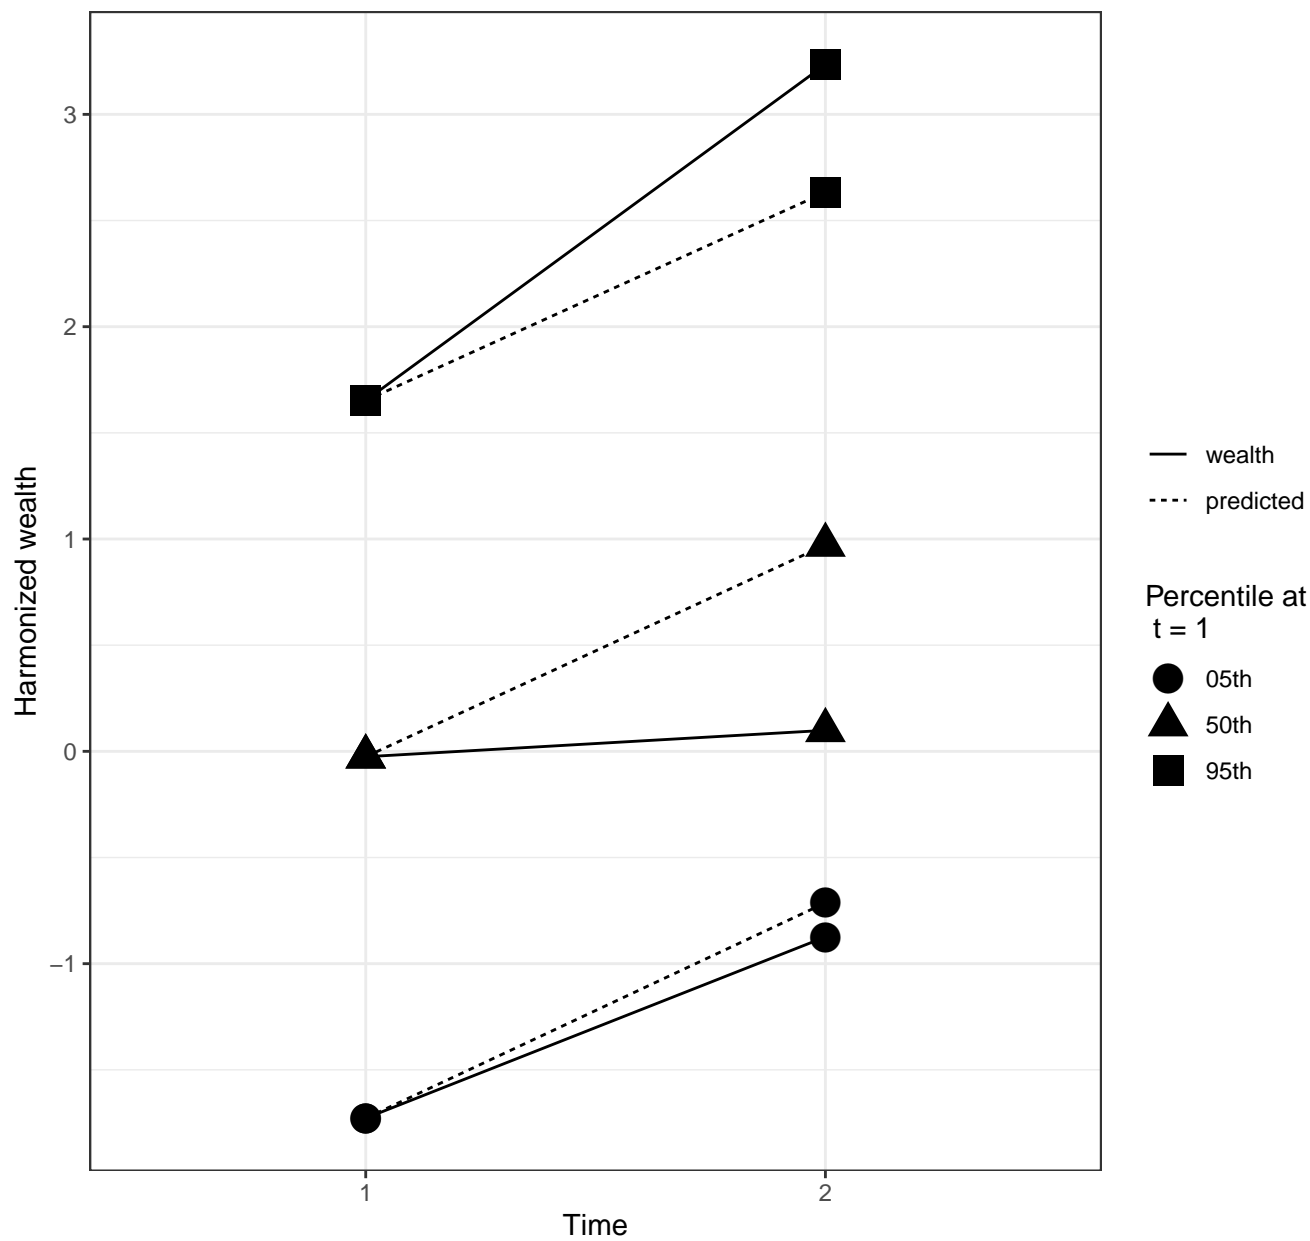

$w_2 = -1 + -1 * w_1 + N(0,1);$   
Variance at time 2: time 1 = 2.1

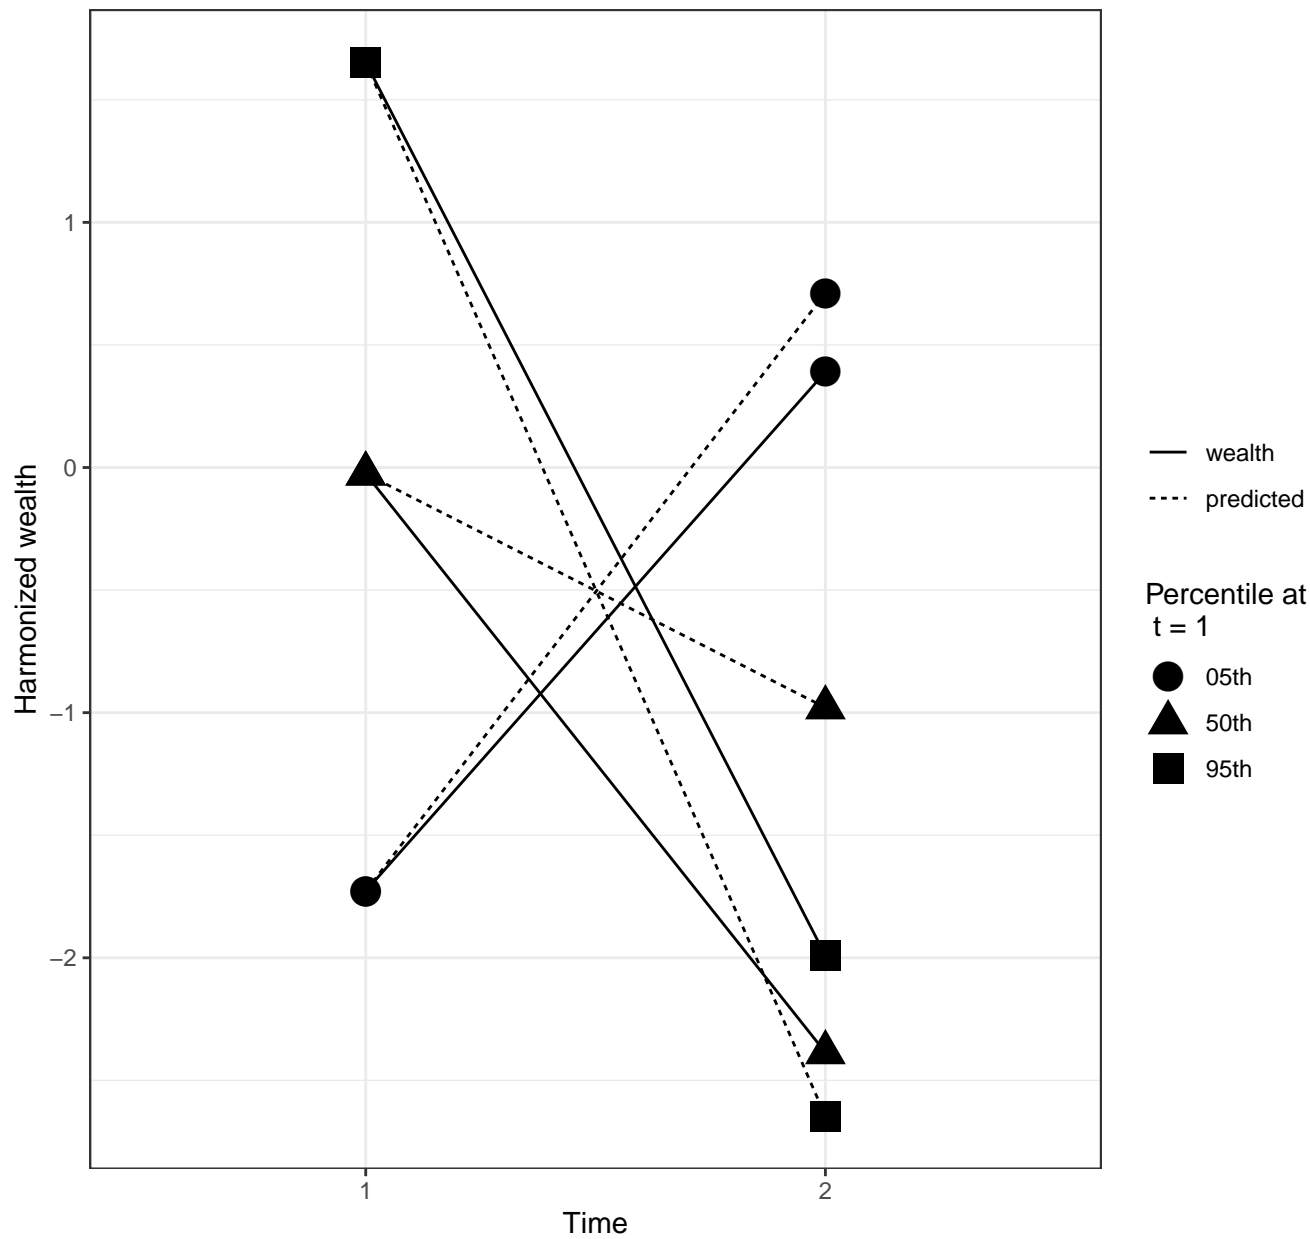

$w_2 = -0.5 + -1 * w_1 + N(0,1);$   
Variance at time 2: time 1 = 2

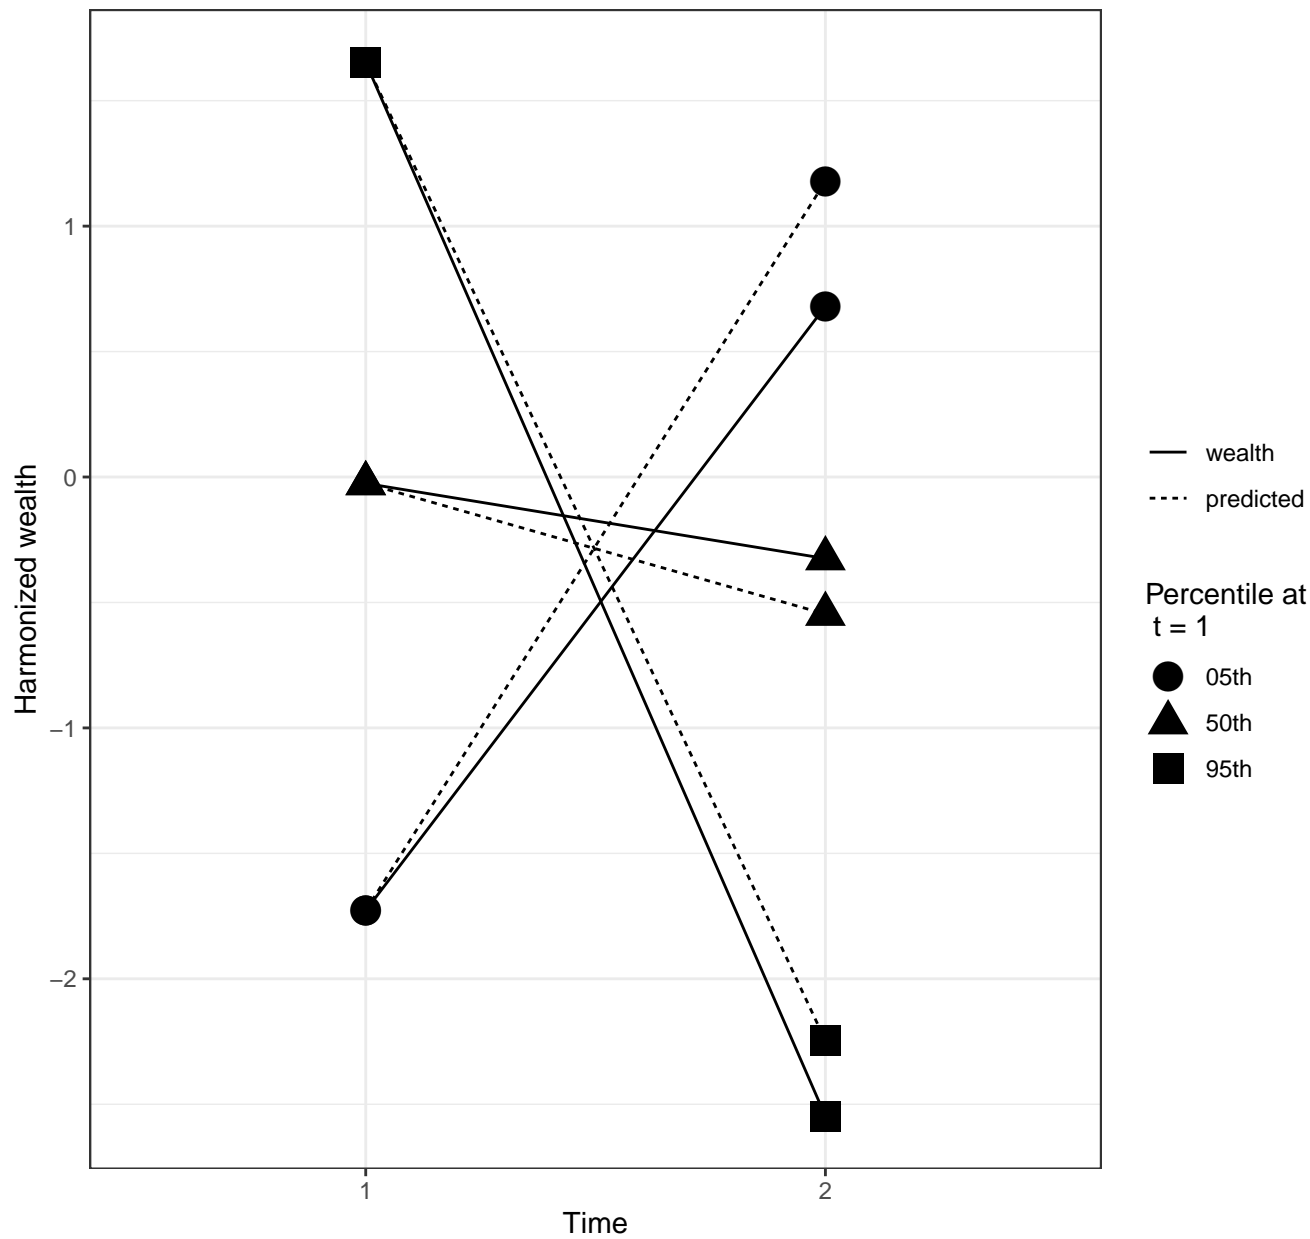



$w_2 = -0.3 + -1 * w_1 + N(0,1);$   
Variance at time 2: time 1 = 2

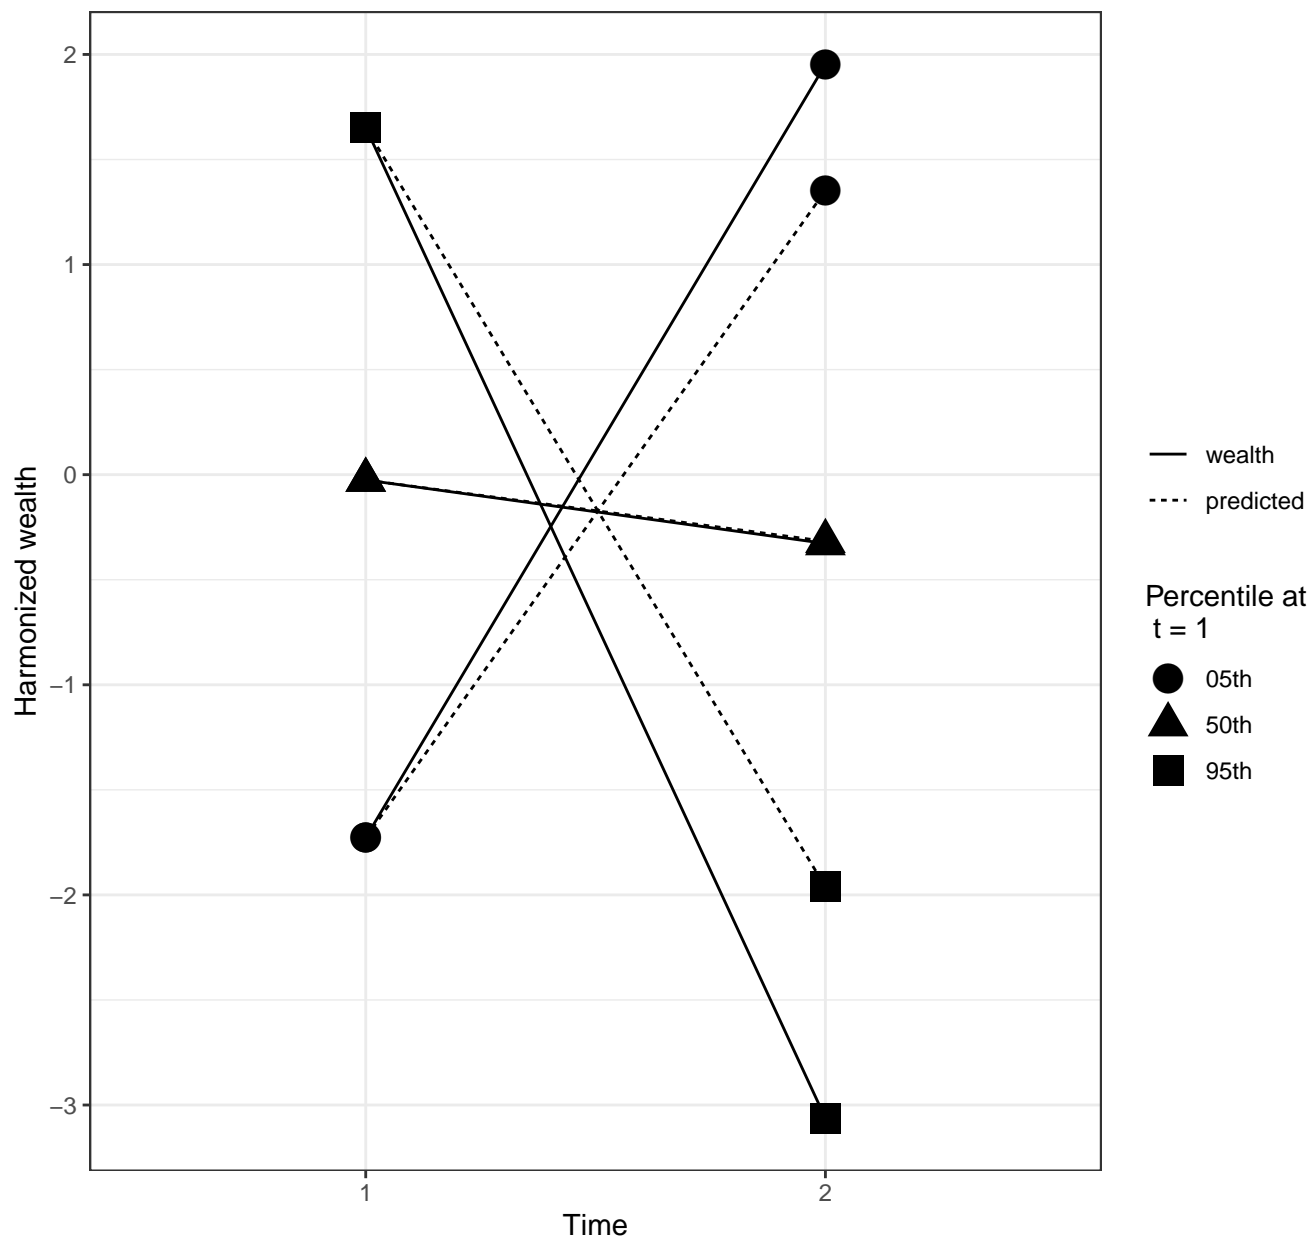

$w_2 = 0 + -1 * w_1 + N(0,1);$   
Variance at time 2: time 1 = 2

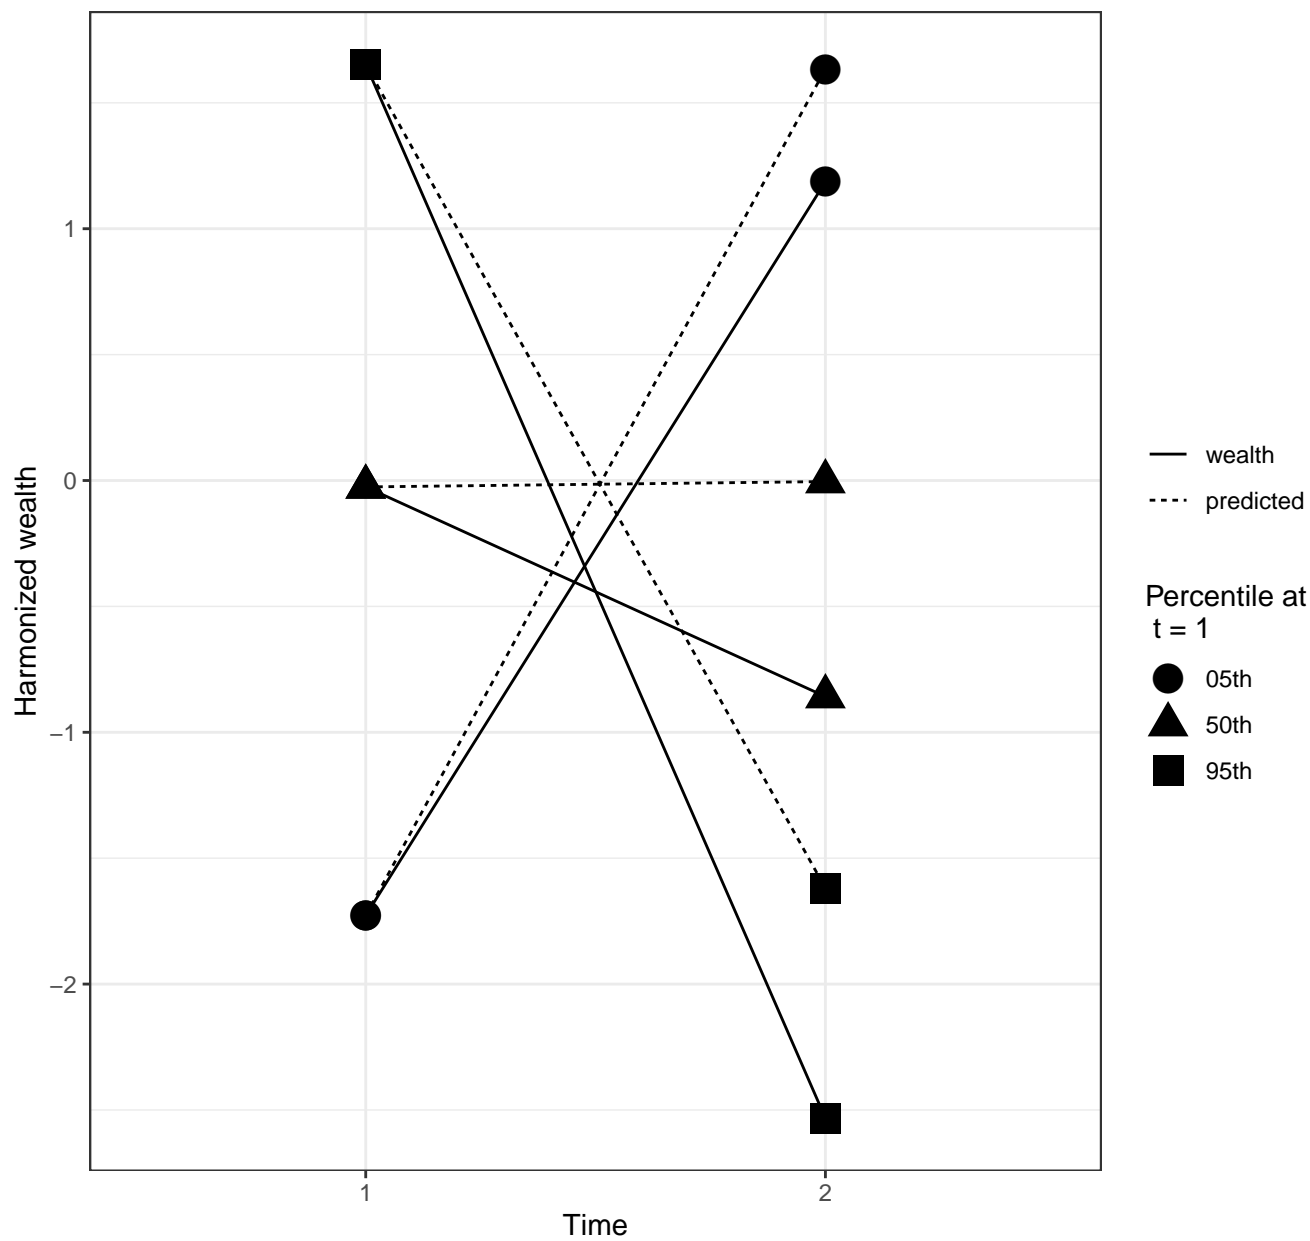

$w_2 = 0.3 + -1 * w_1 + N(0,1);$   
Variance at time 2: time 1 = 2

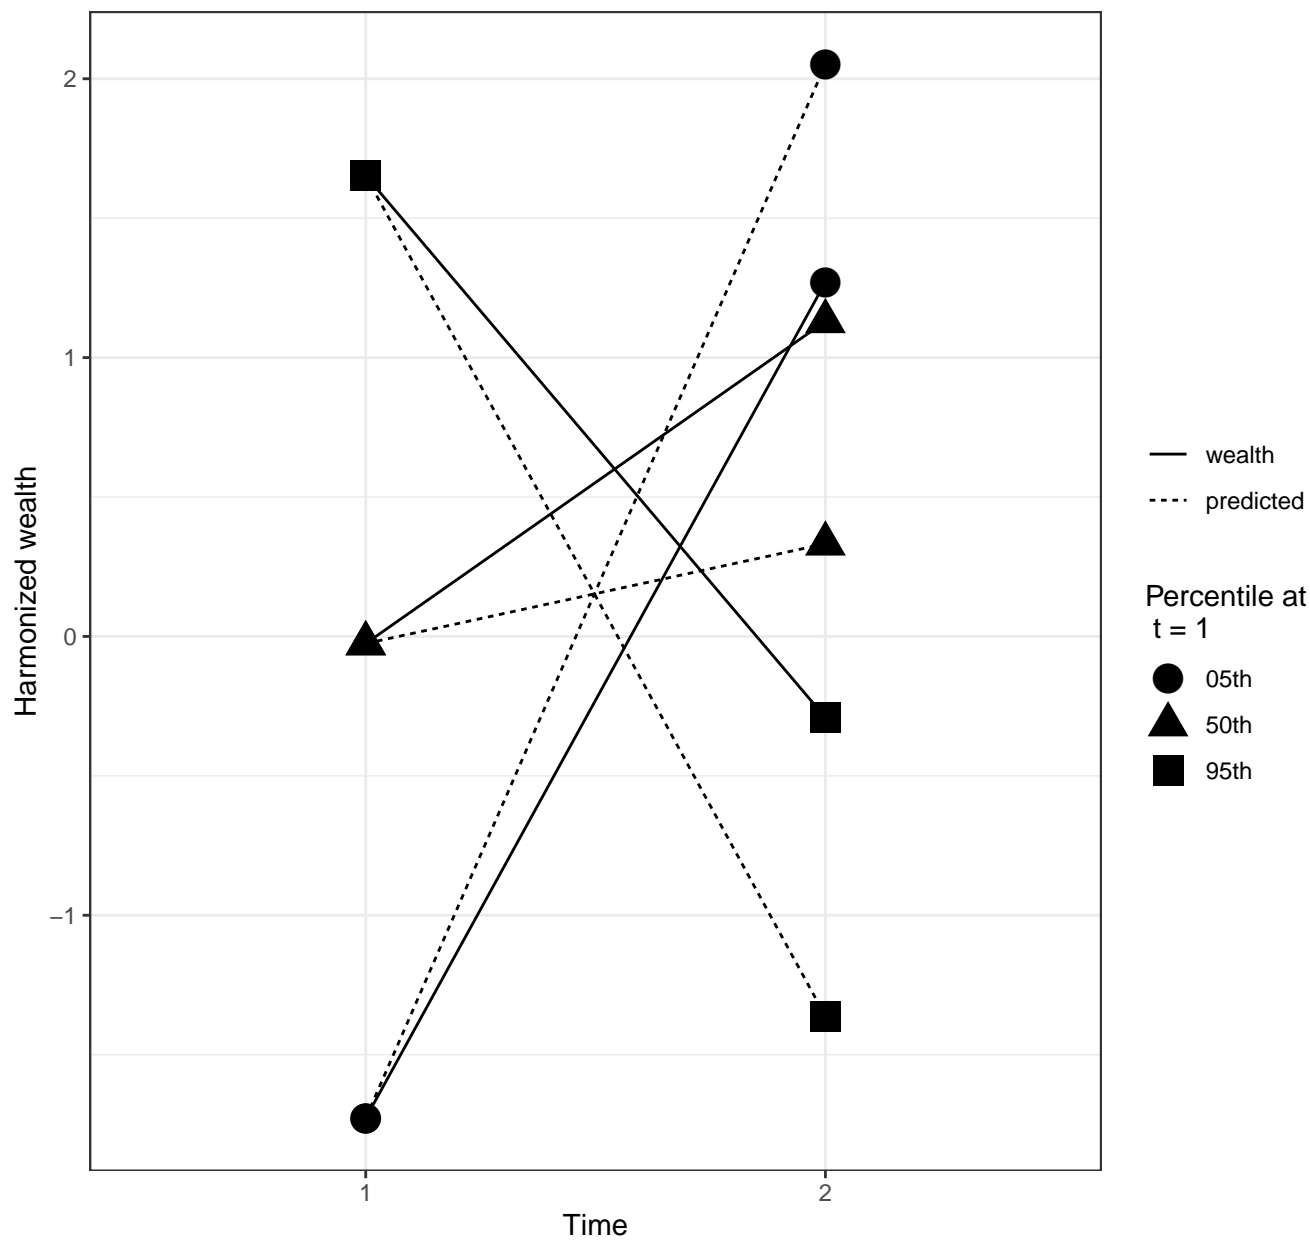

$w_2 = 0.5 + -1 * w_1 + N(0,1);$   
Variance at time 2: time 1 = 2.1

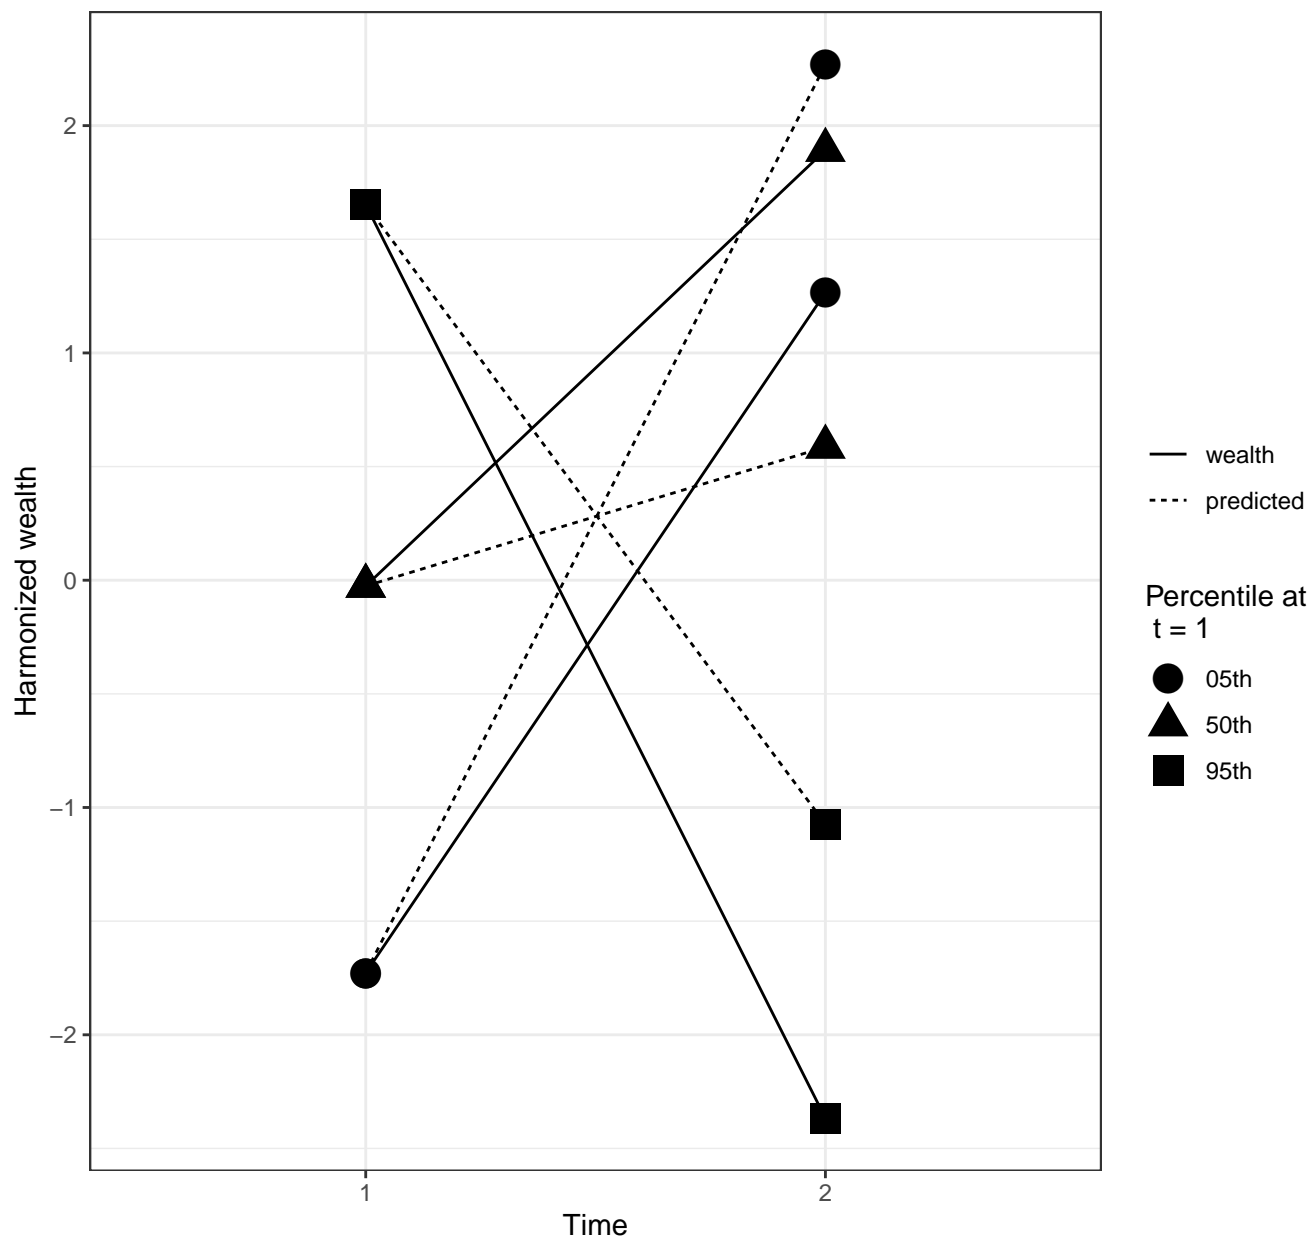

$w_2 = 1 + -1 * w_1 + N(0,1);$   
Variance at time 2: time 1 = 2.1

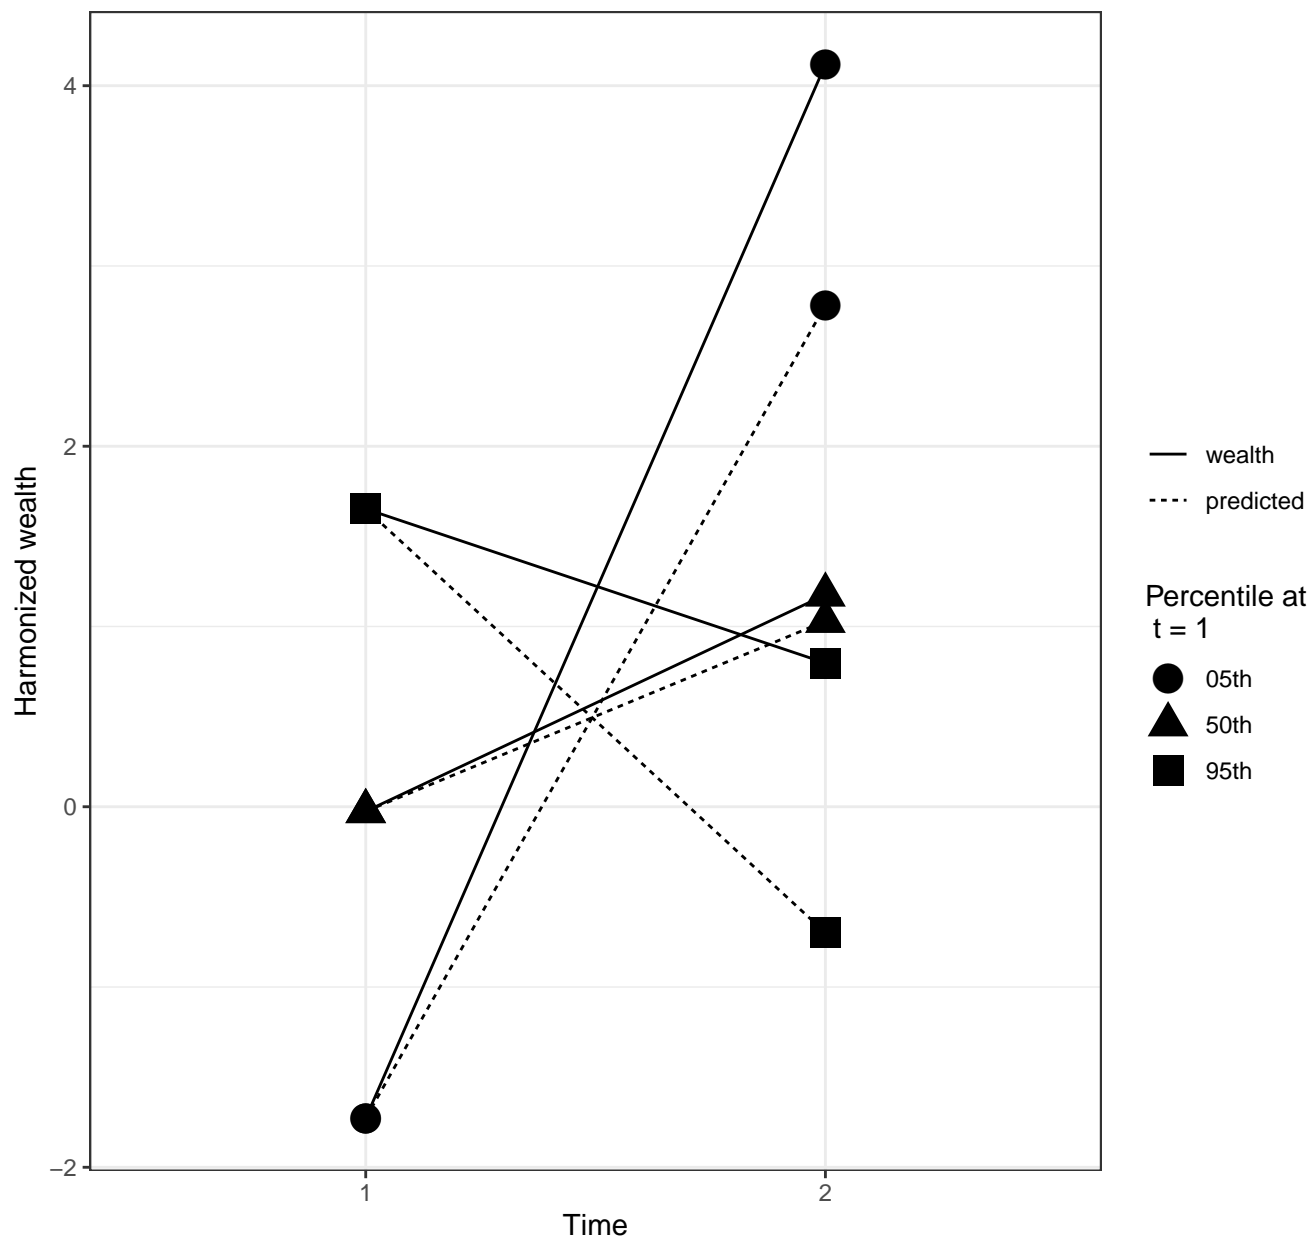

$w_2 = -1 + -0.5 \cdot w_1 + N(0,1);$   
Variance at time 2: time 1 = 1.2

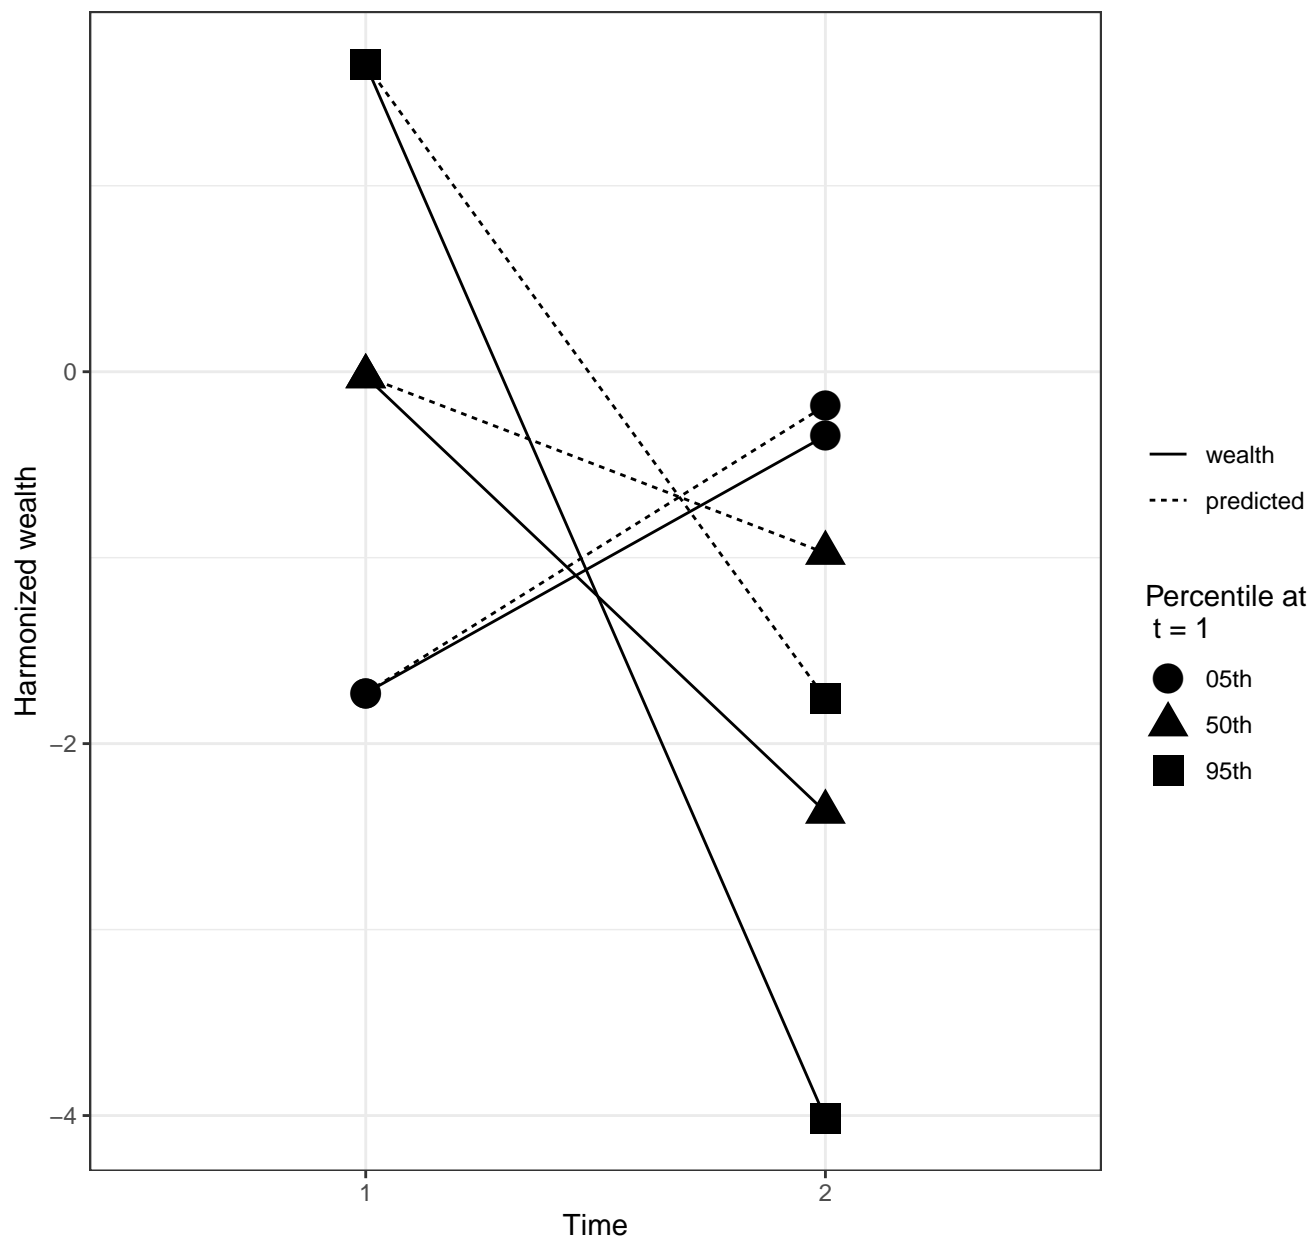

$w_2 = -0.5 + -0.5*w_1 + N(0,1);$   
Variance at time 2: time 1 = 1.3

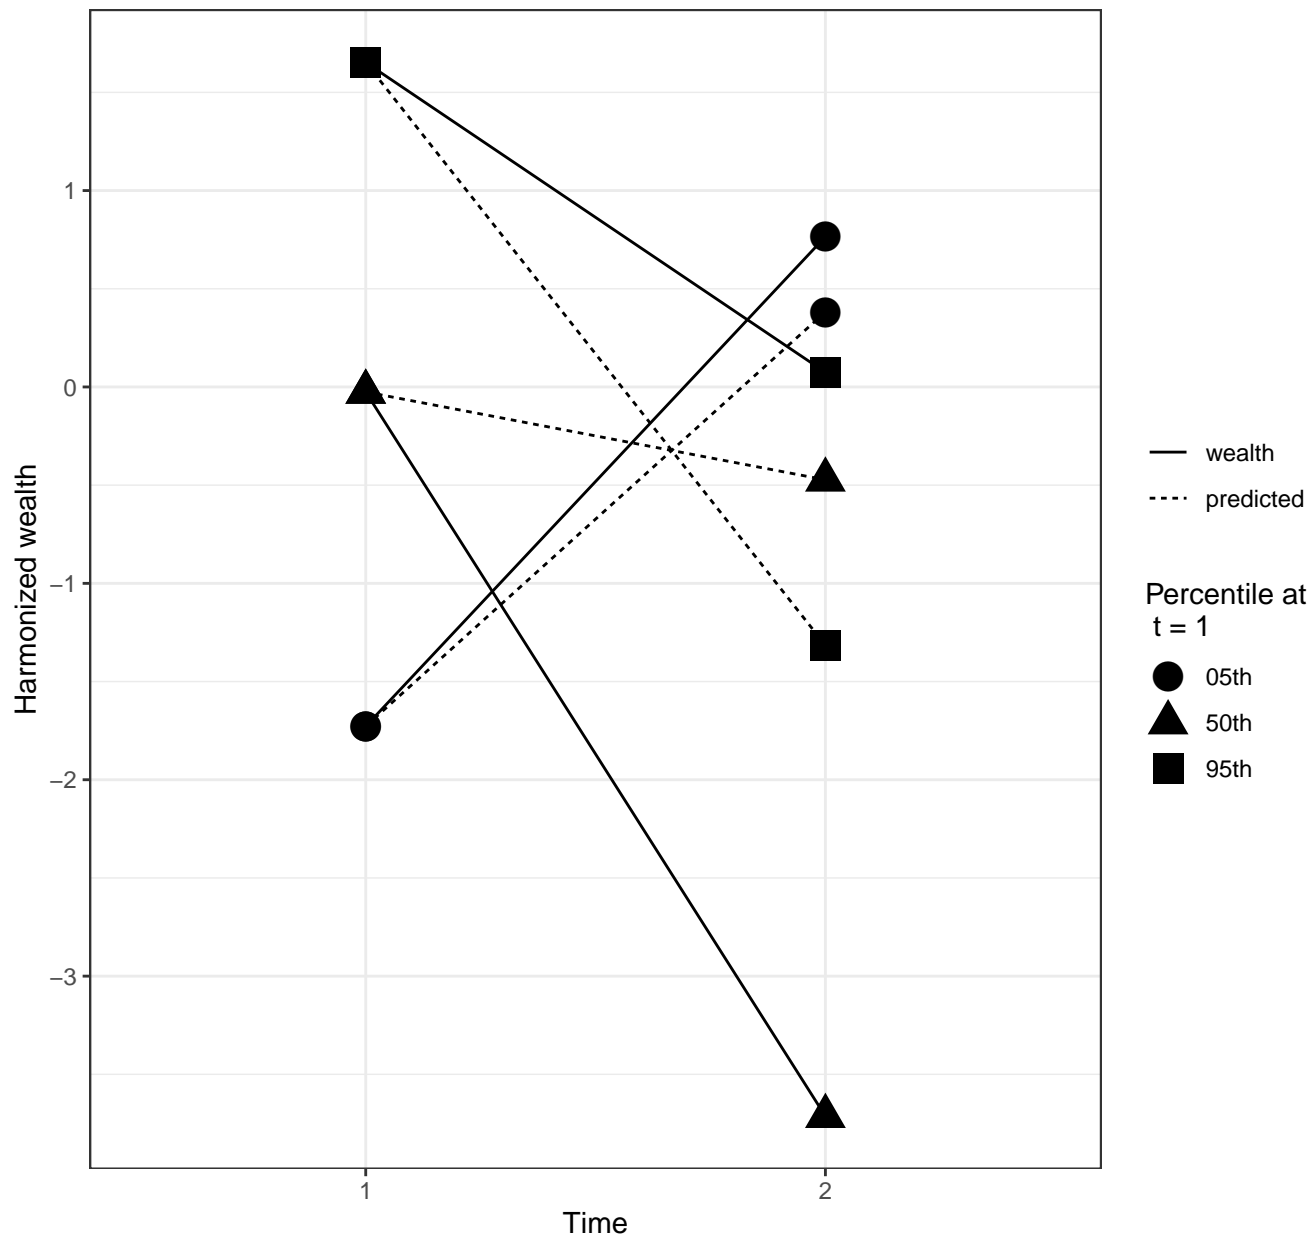

$w_2 = -0.3 + -0.5*w_1 + N(0,1);$   
Variance at time 2: time 1 = 1.3

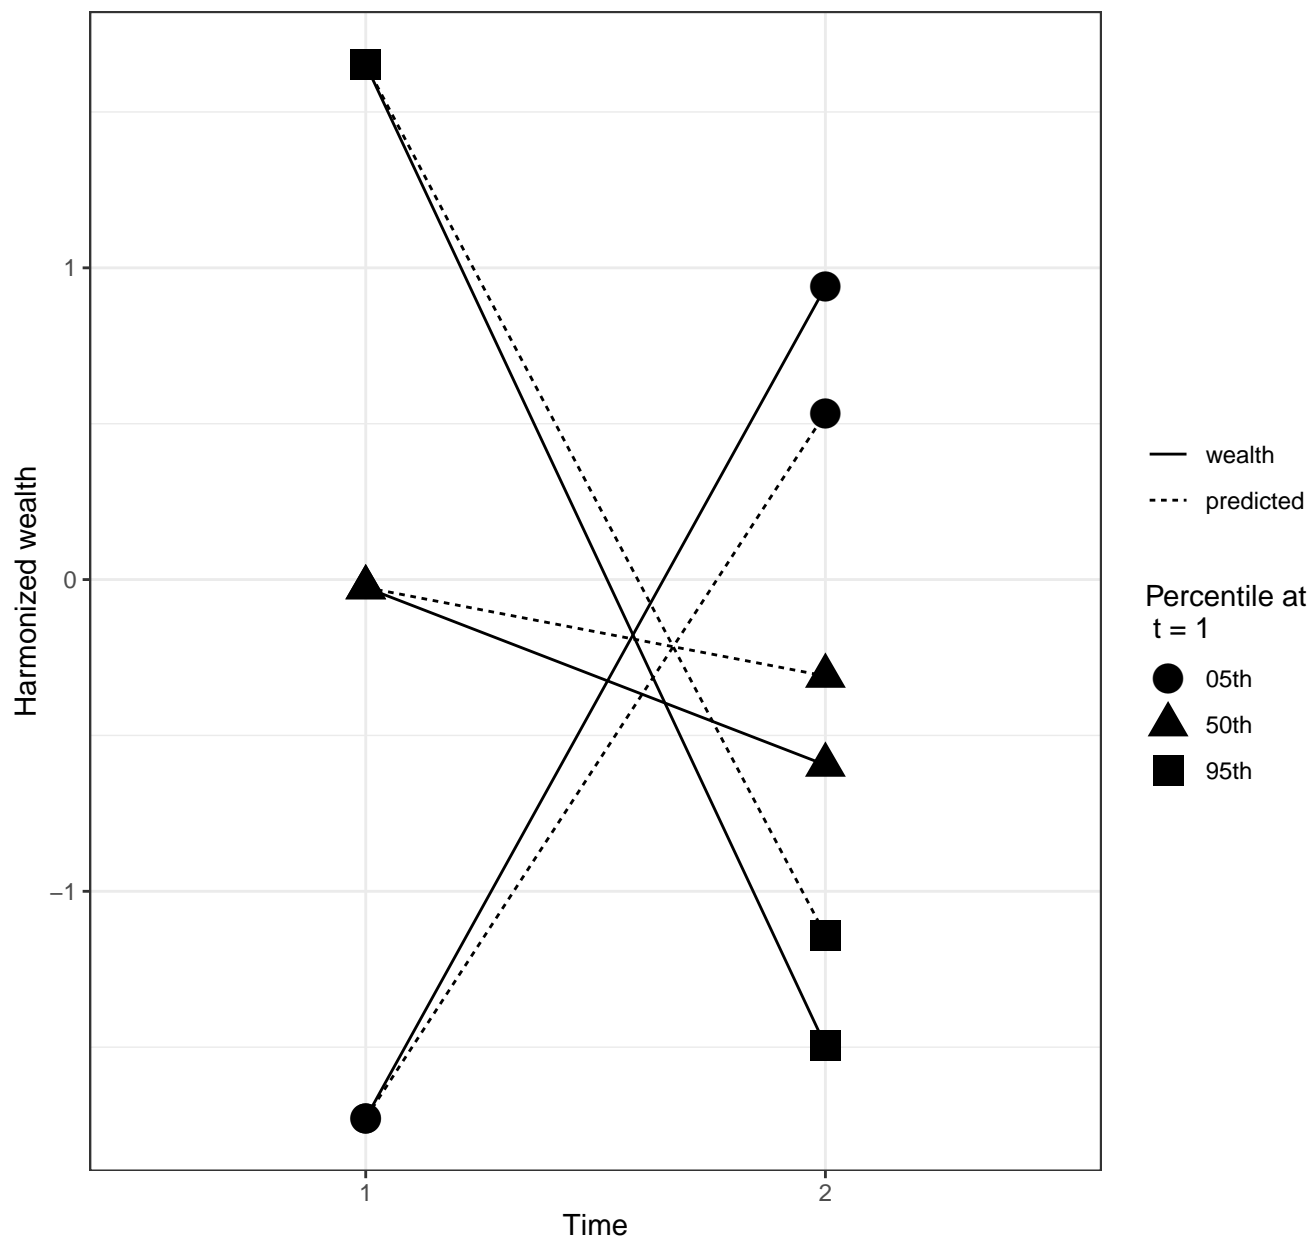



$w_2 = 0 + -0.5 * w_1 + N(0,1);$   
Variance at time 2: time 1 = 1.2

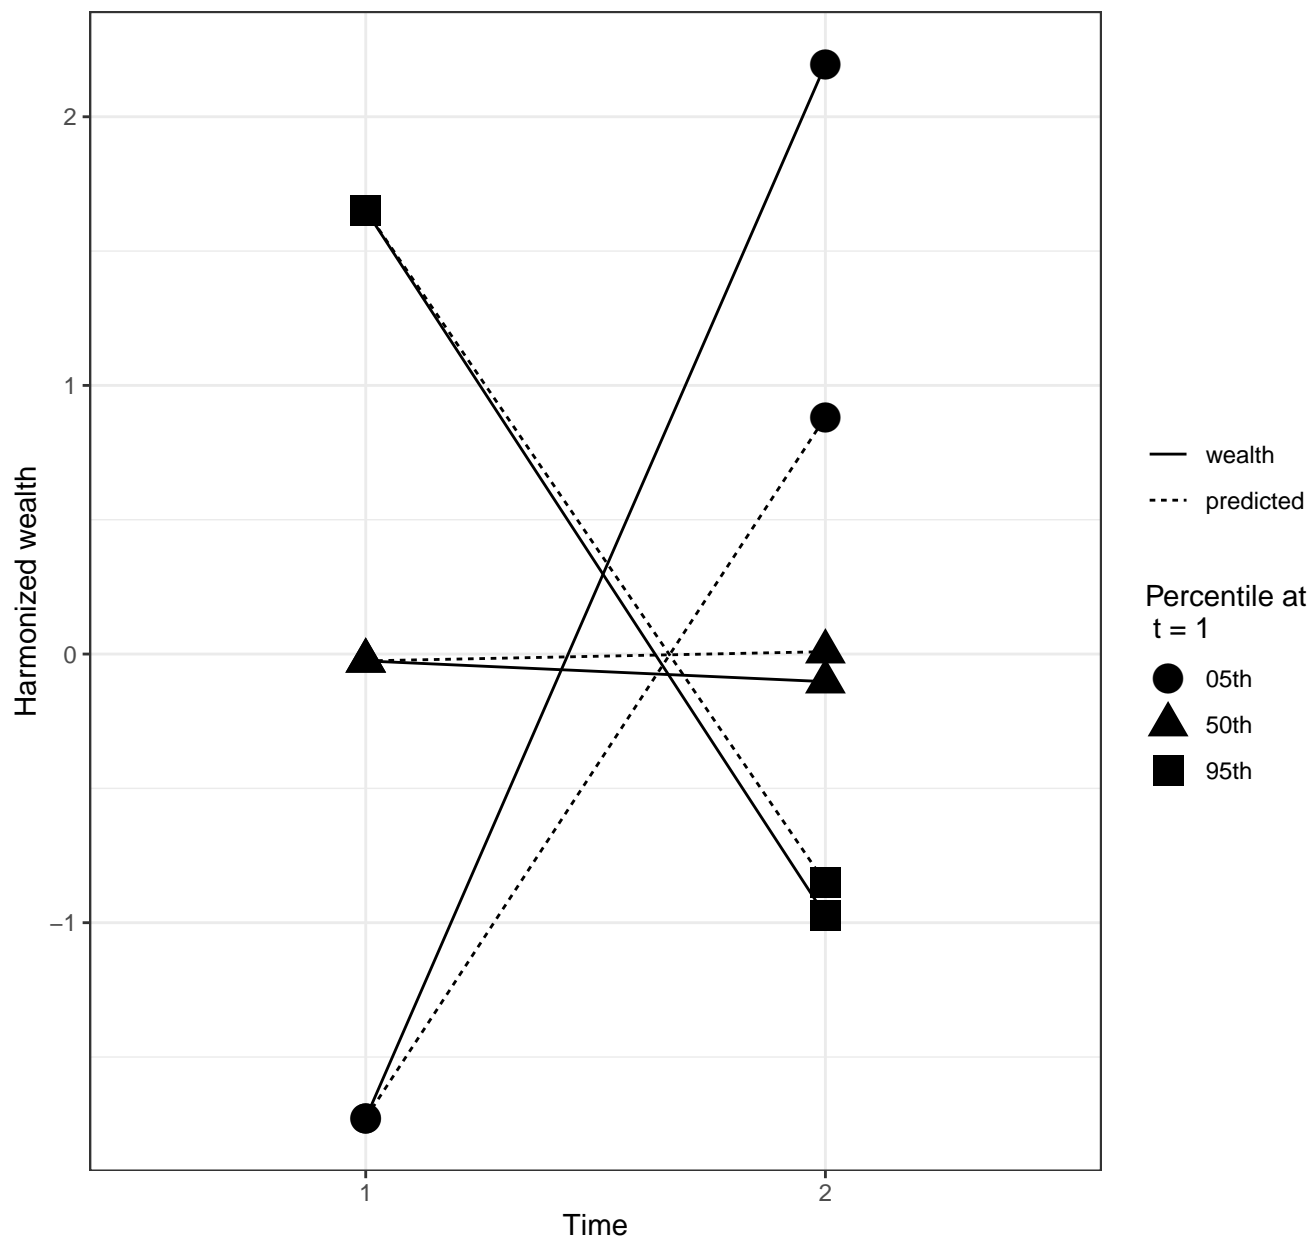

$w_2 = 0.3 + -0.5 * w_1 + N(0,1);$   
Variance at time 2: time 1 = 1.3

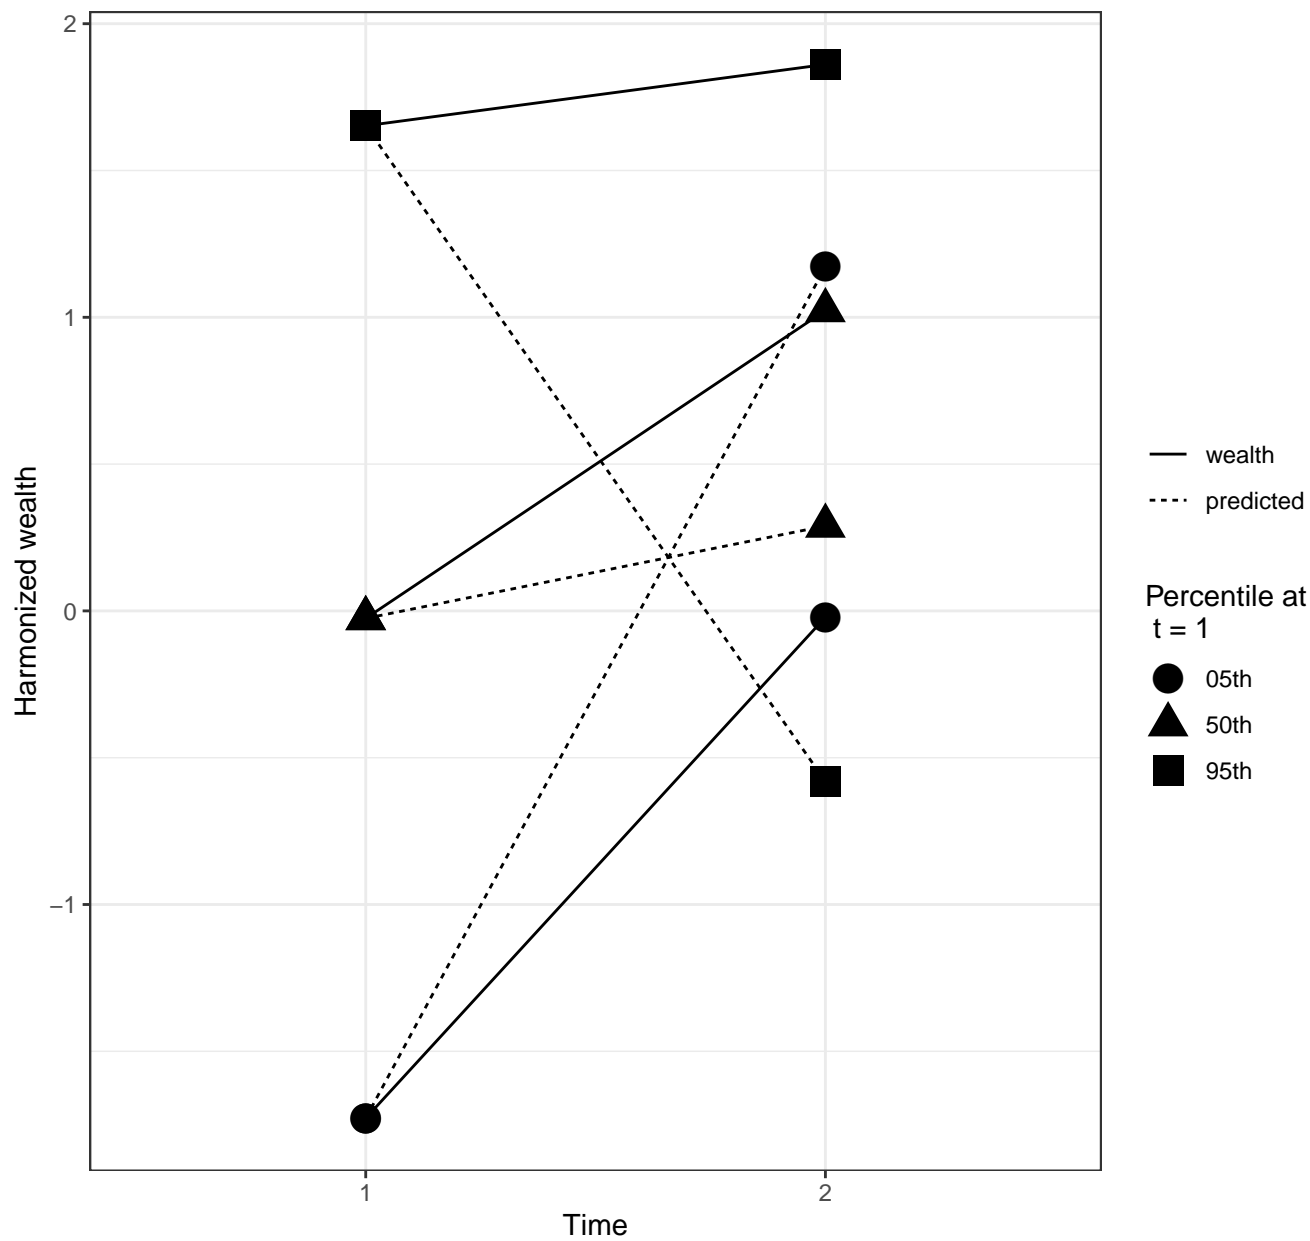

$w_2 = 0.5 + -0.5*w_1 + N(0,1);$   
Variance at time 2: time 1 = 1.2

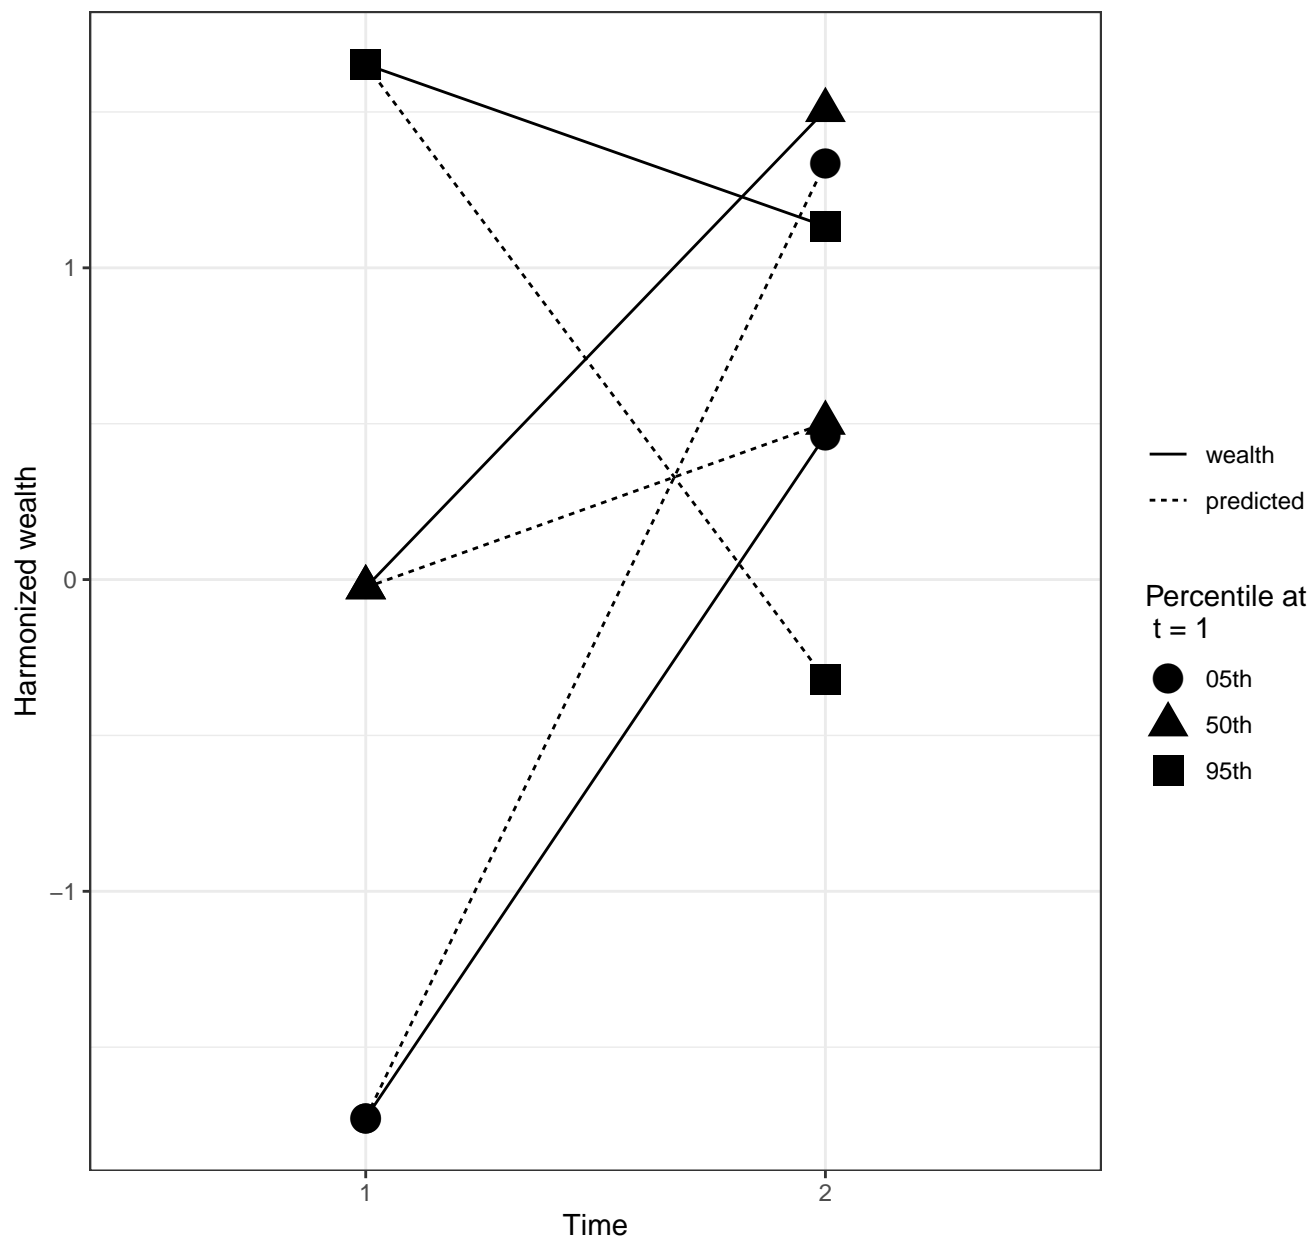

$w_2 = 1 + -0.5 * w_1 + N(0,1);$   
Variance at time 2: time 1 = 1.2

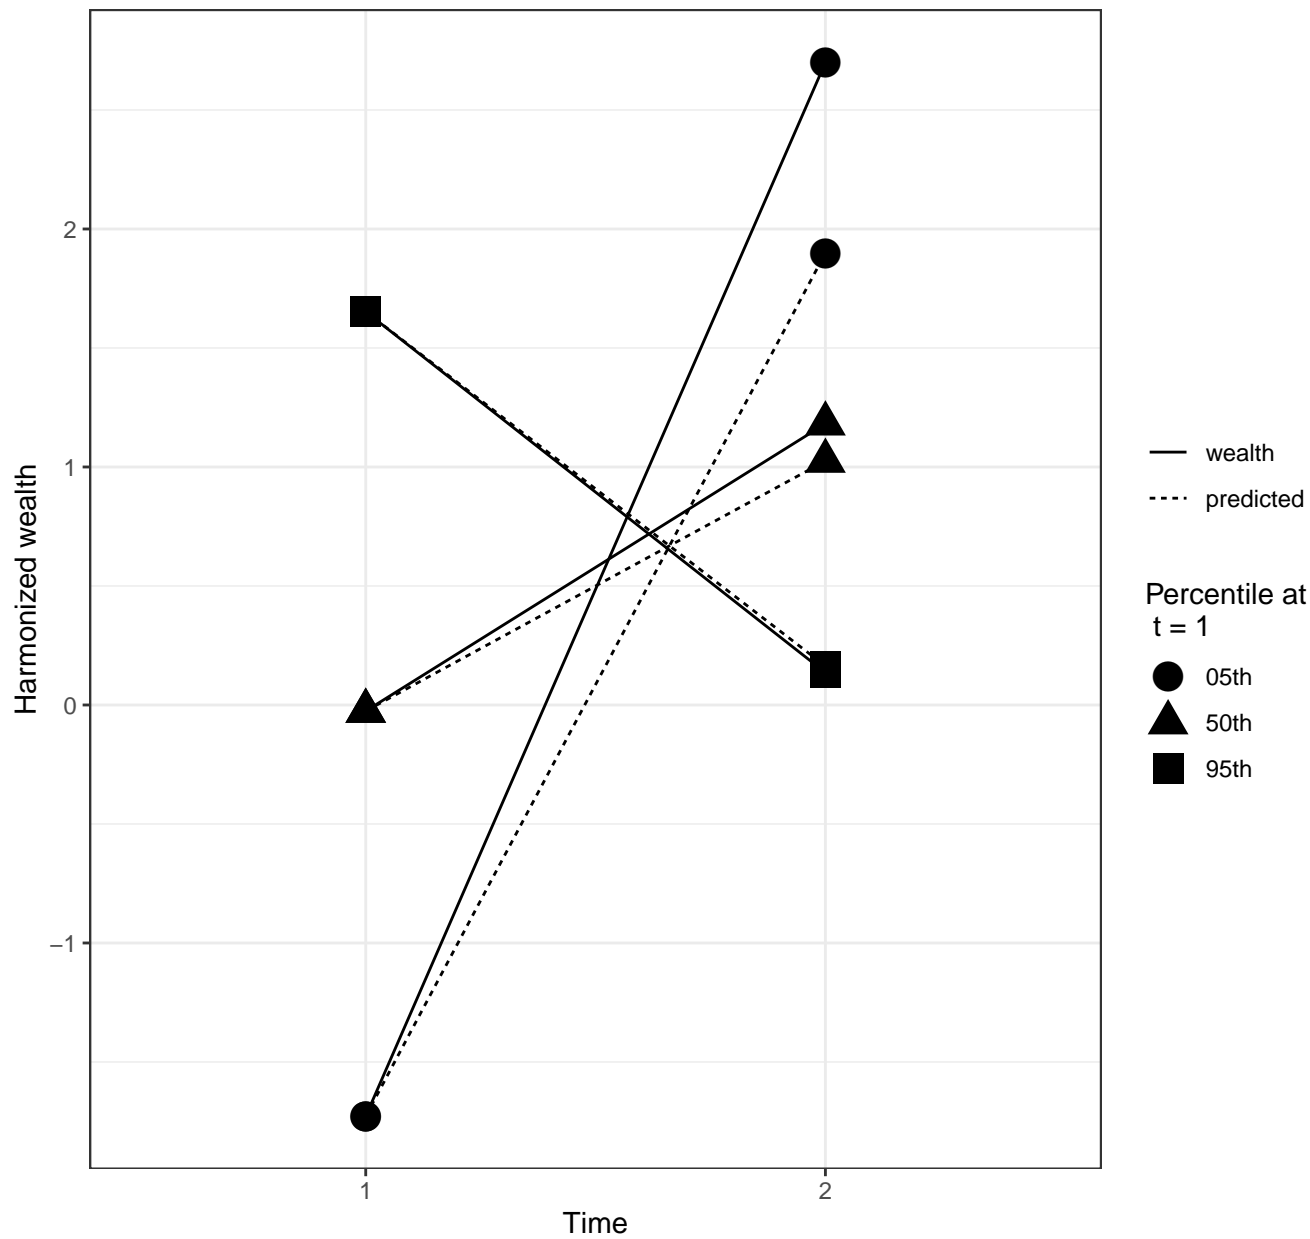

$w_2 = -1 + 0 \cdot w_1 + N(0,1);$   
Variance at time 2: time 1 = 1

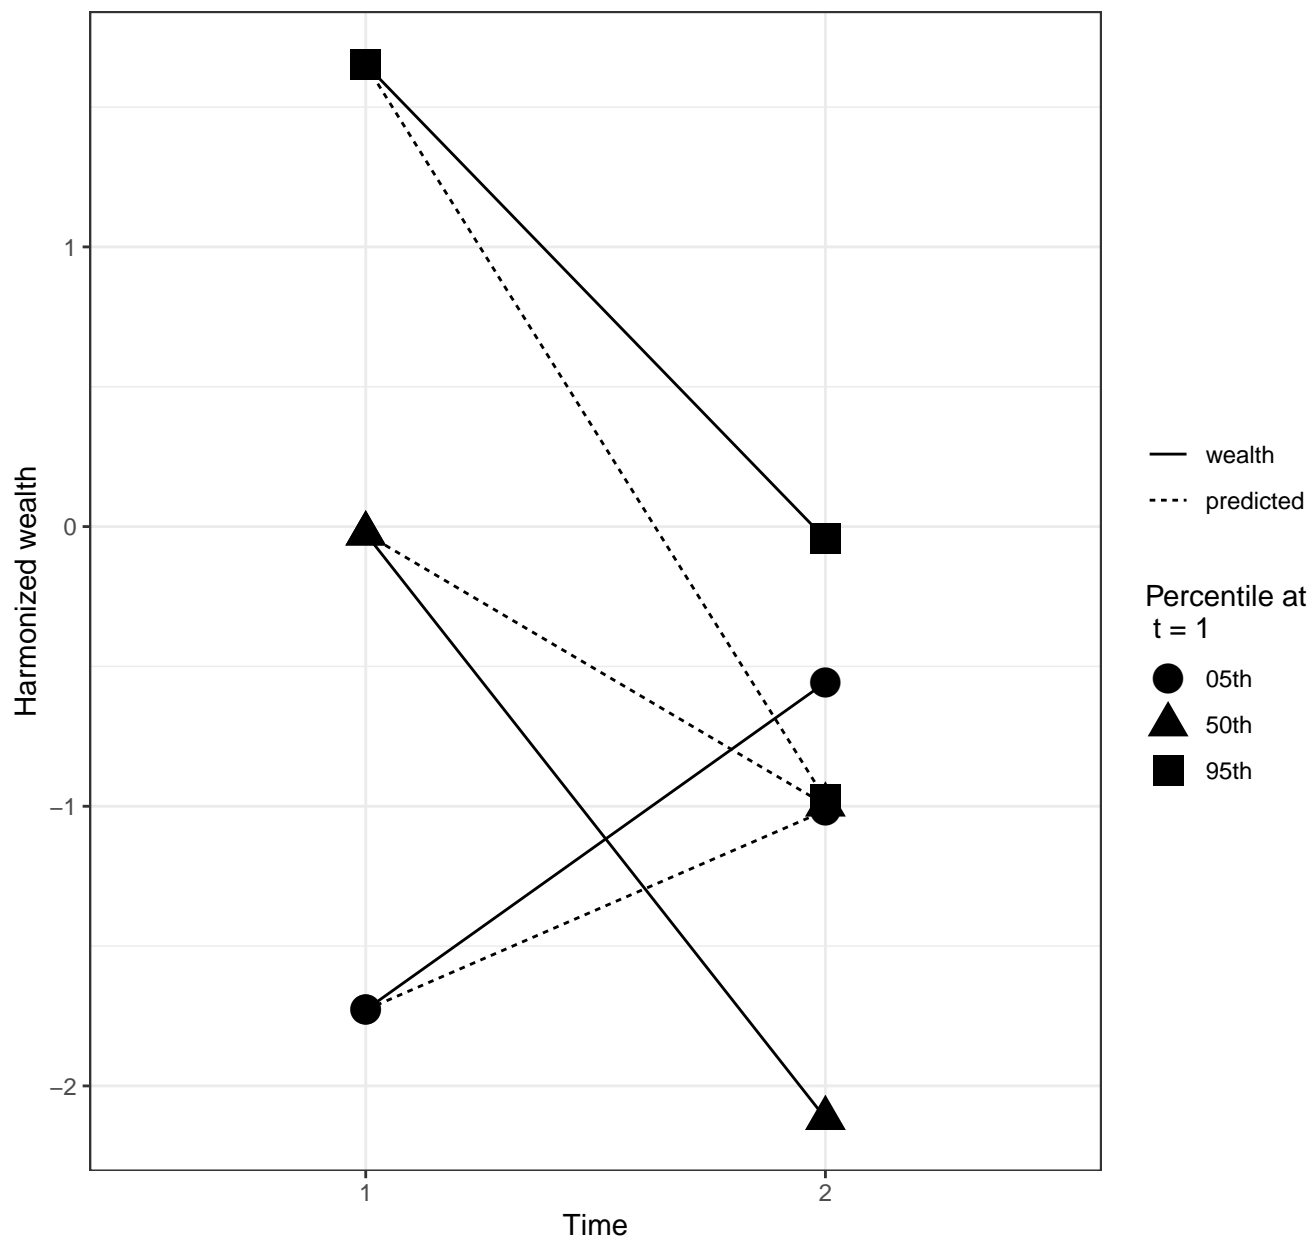

$w_2 = -0.5 + 0 \cdot w_1 + N(0,1);$   
Variance at time 2: time 1 = 1

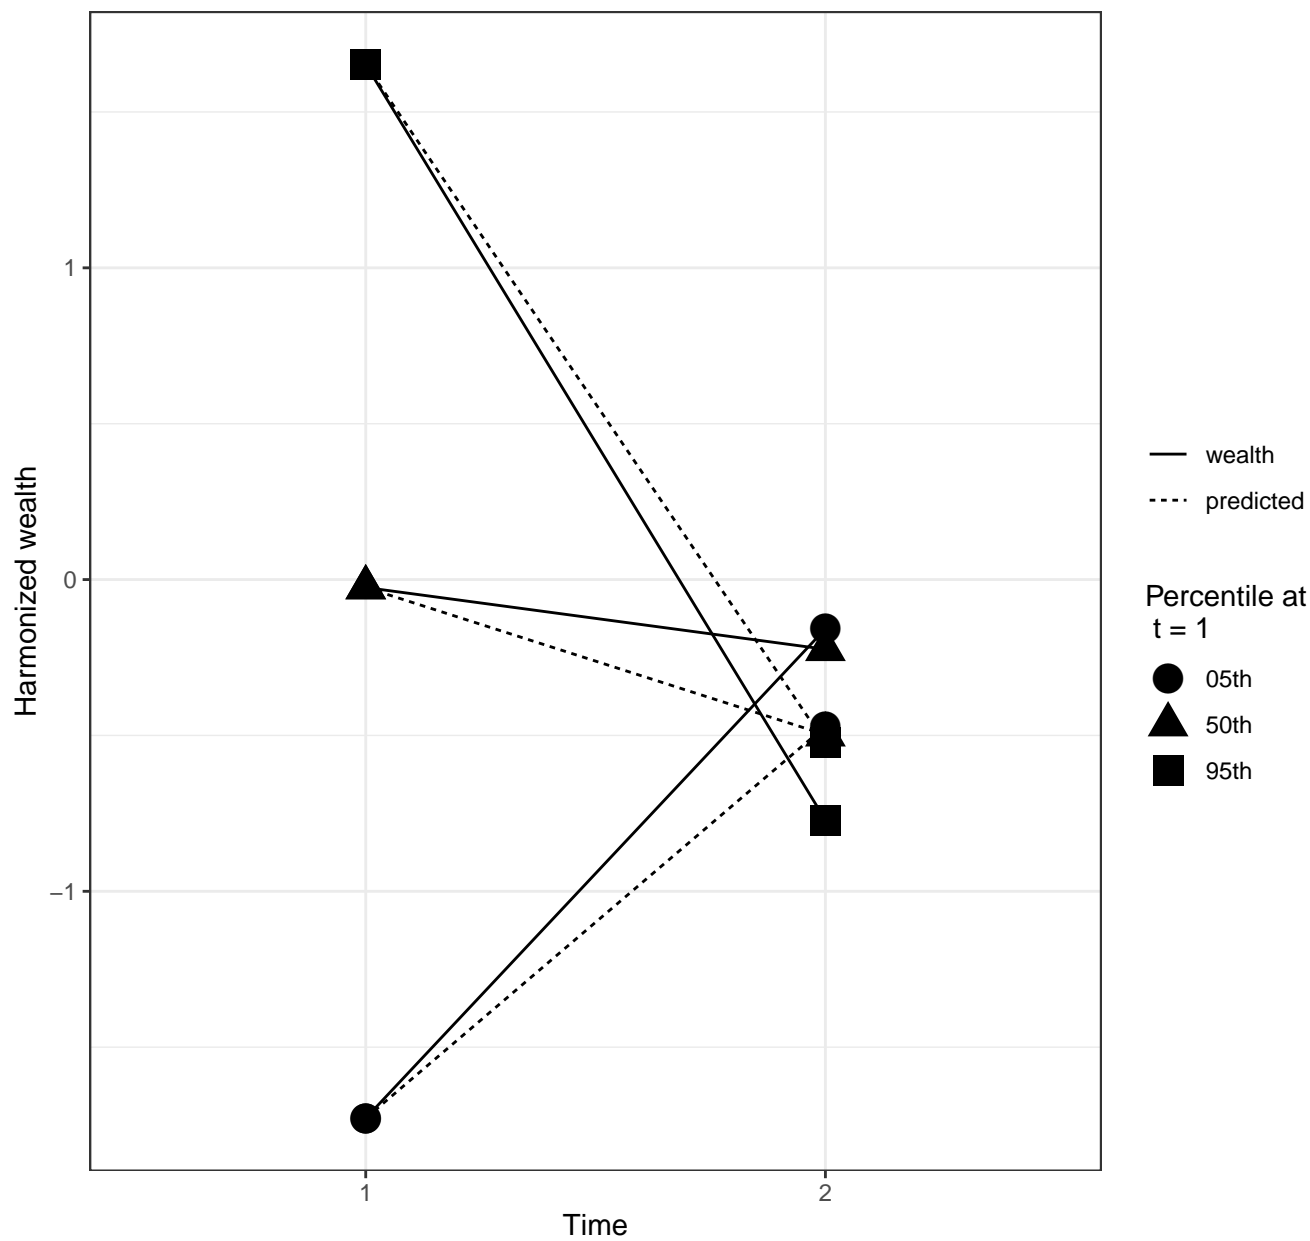

$w_2 = -0.3 + 0 \cdot w_1 + N(0,1);$   
Variance at time 2: time 1 = 1

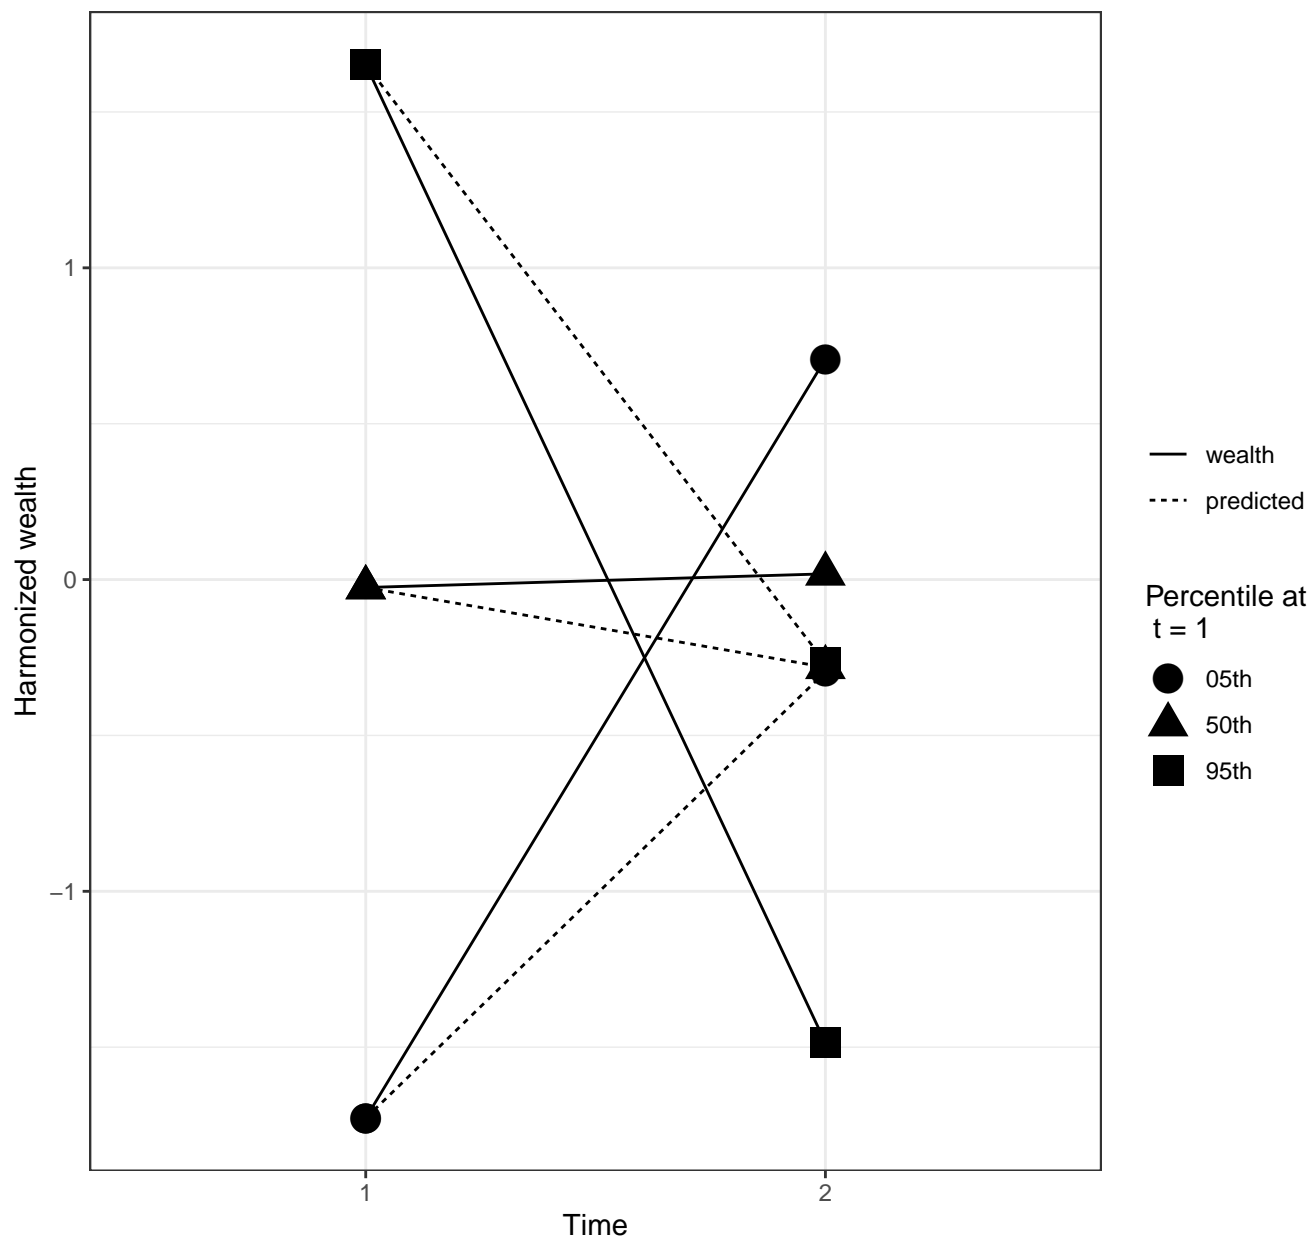

$w_2 = 0 + 0 \cdot w_1 + N(0,1);$   
Variance at time 2: time 1 = 1.1

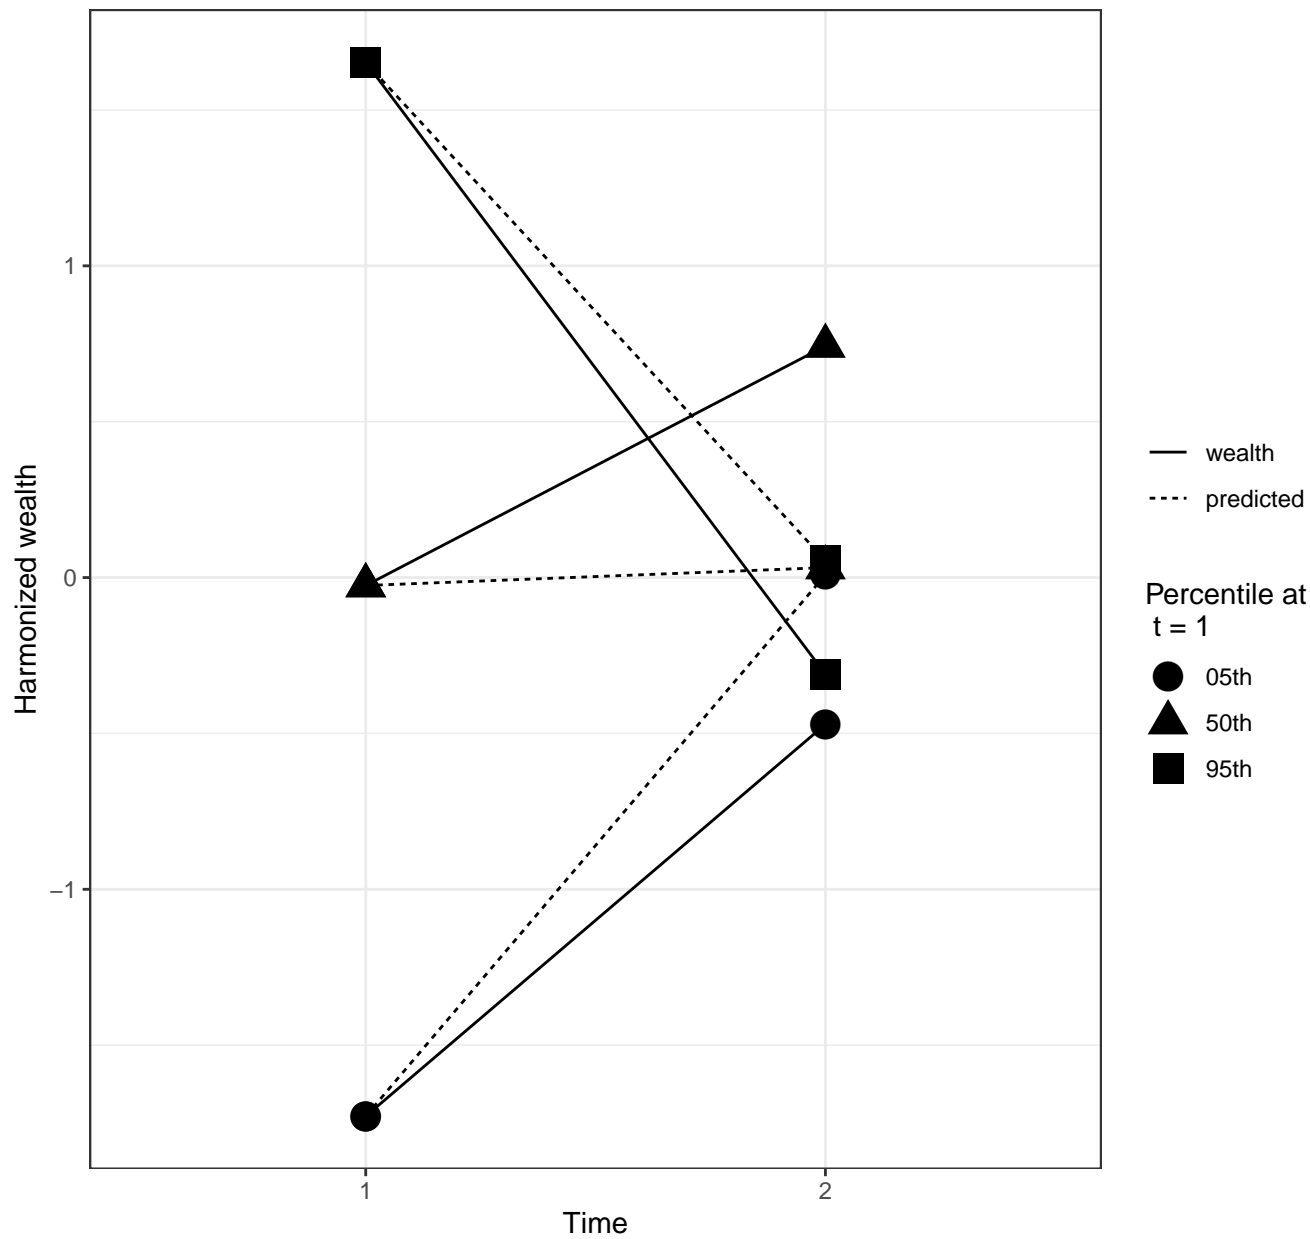



$w_2 = 0.3 + 0 \cdot w_1 + N(0,1);$   
Variance at time 2: time 1 = 1.1

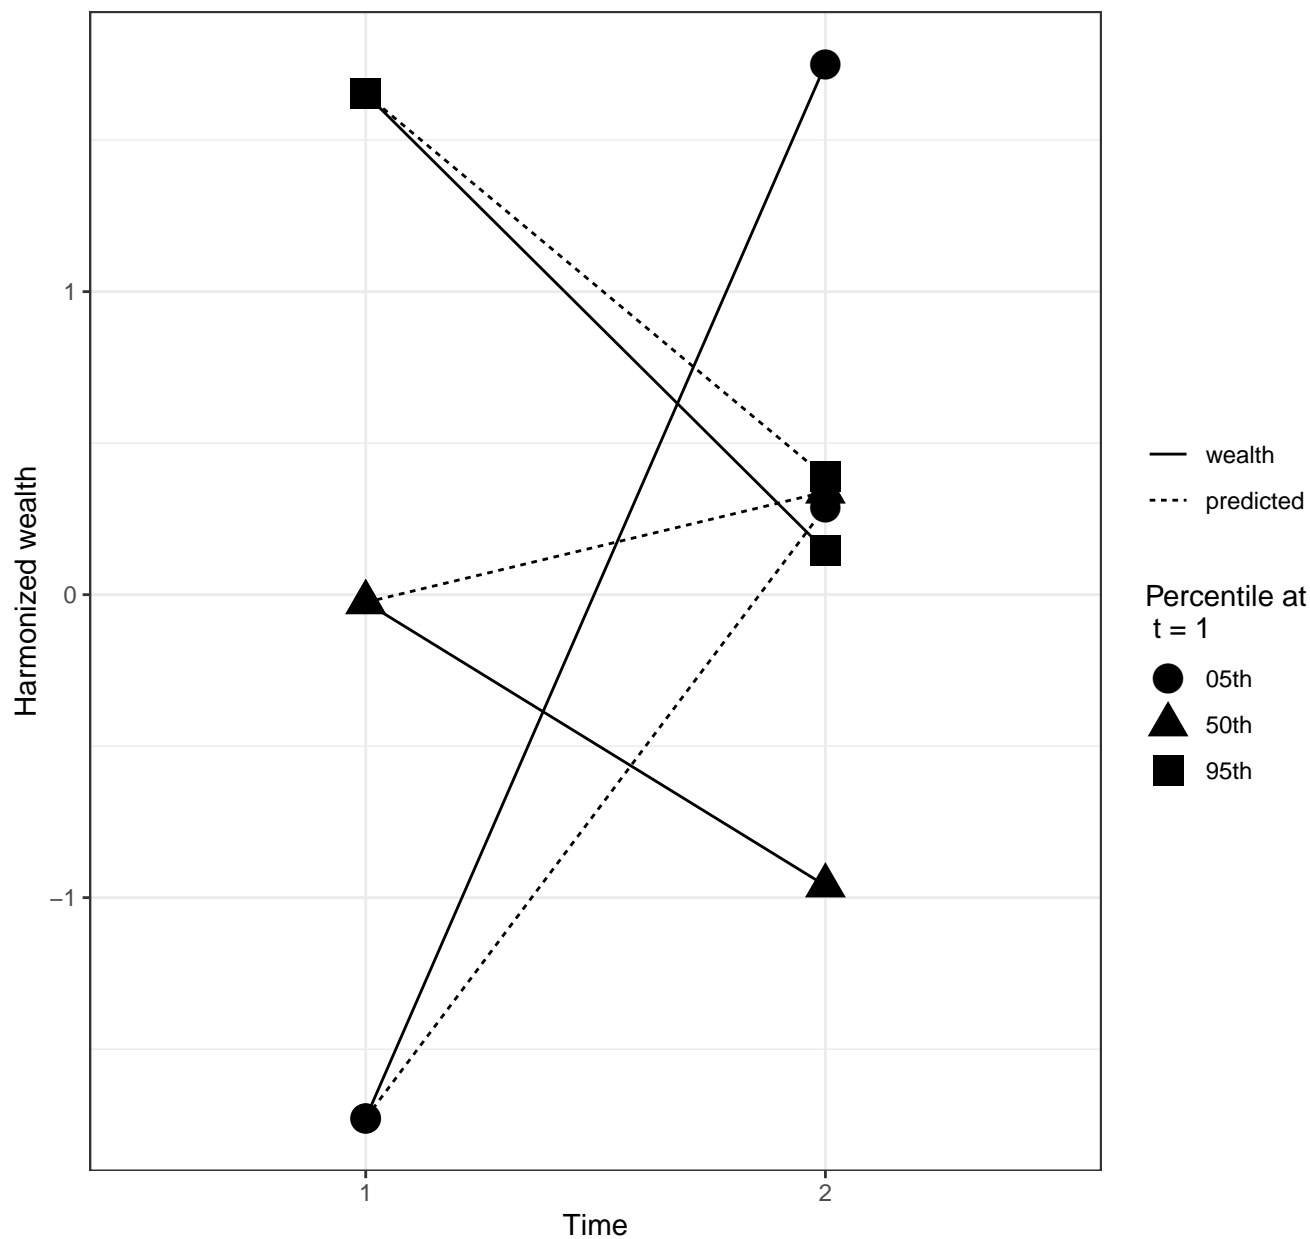

$w_2 = 0.5 + 0 \cdot w_1 + N(0,1);$   
Variance at time 2: time 1 = 1

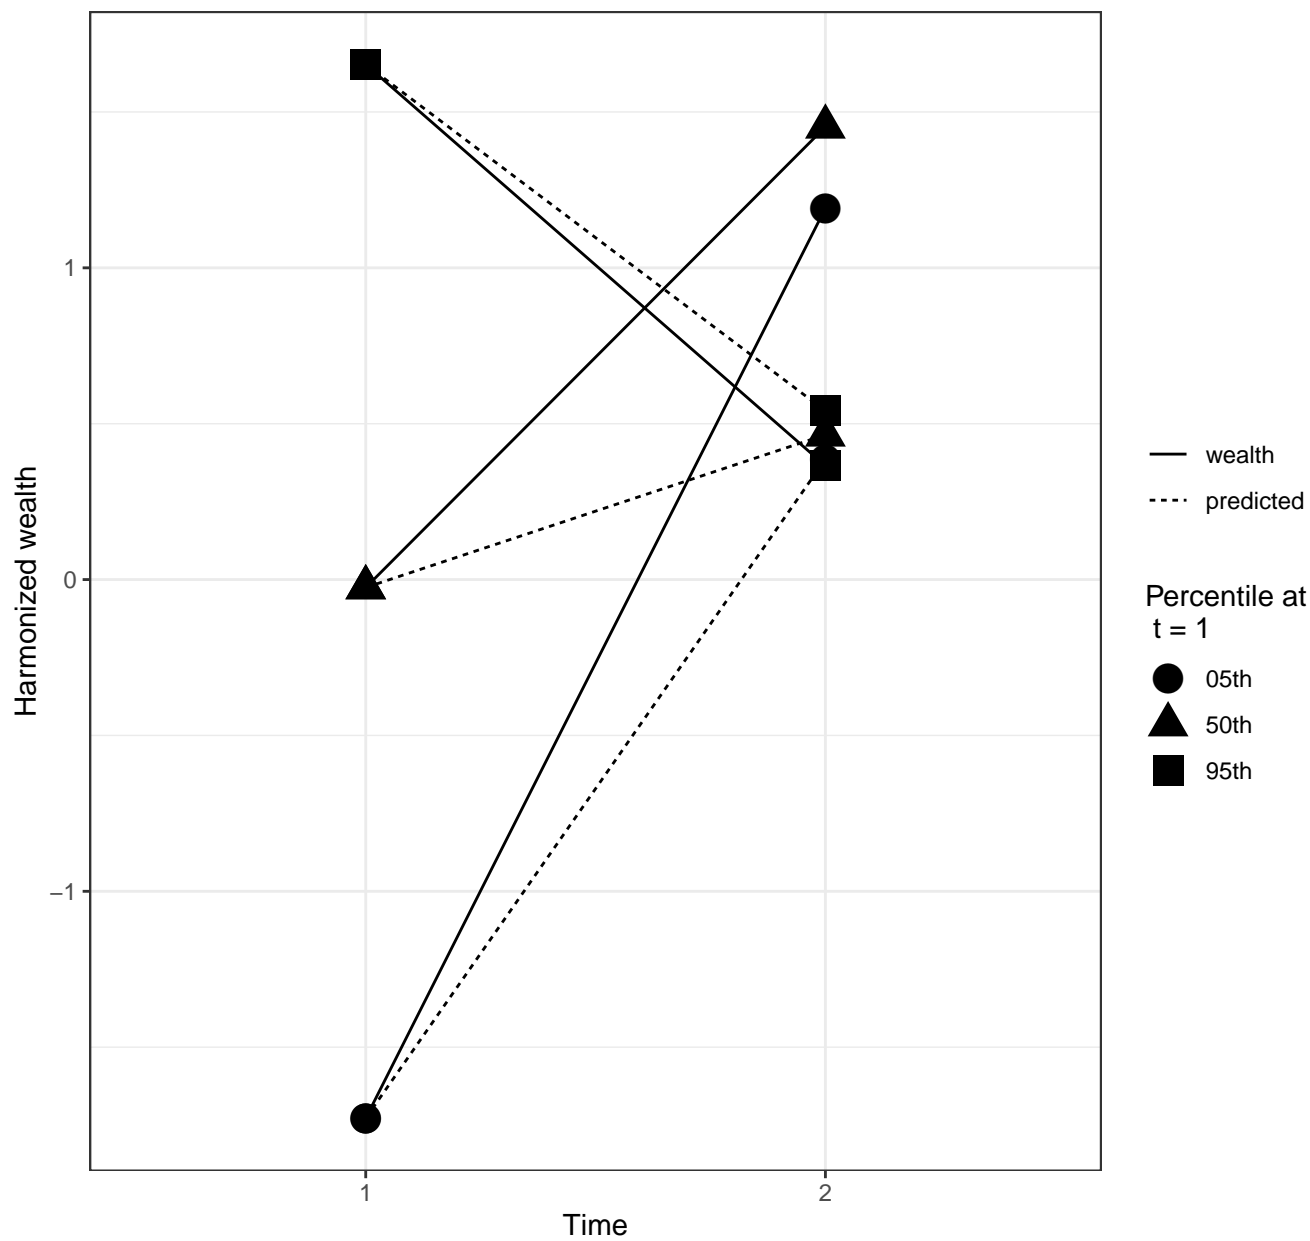

$w_2 = 1 + 0 \cdot w_1 + N(0,1);$   
Variance at time 2: time 1 = 1

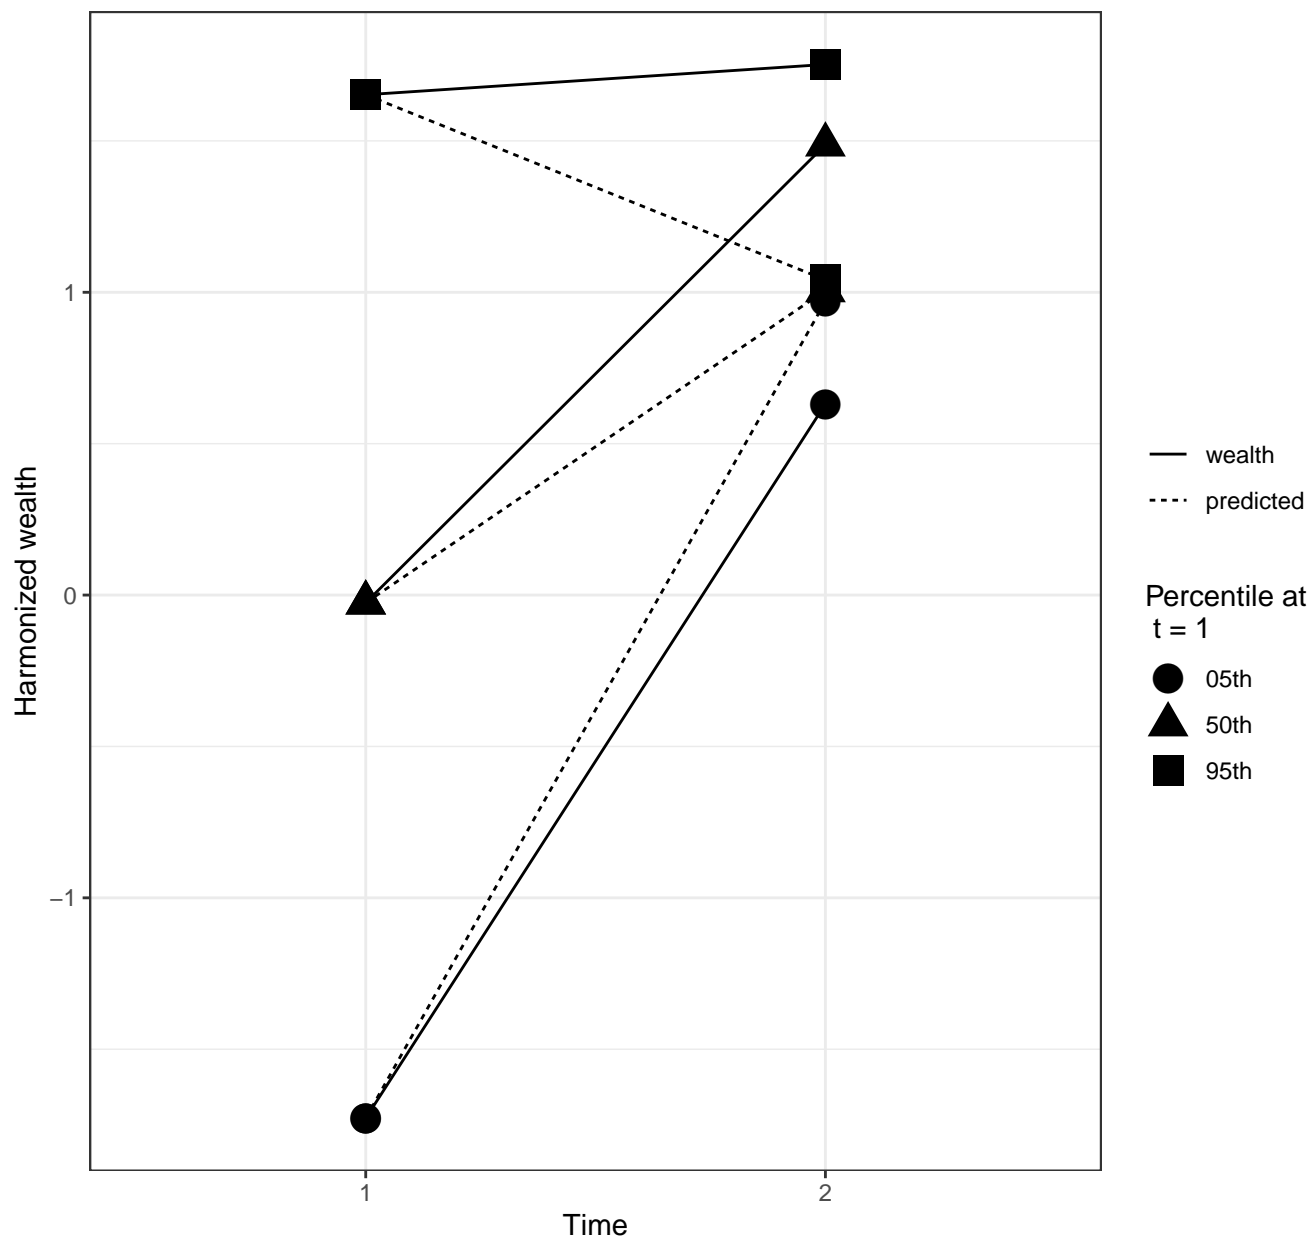

$w_2 = -1 + 0.5 \cdot w_1 + N(0,1);$   
Variance at time 2: time 1 = 1.3

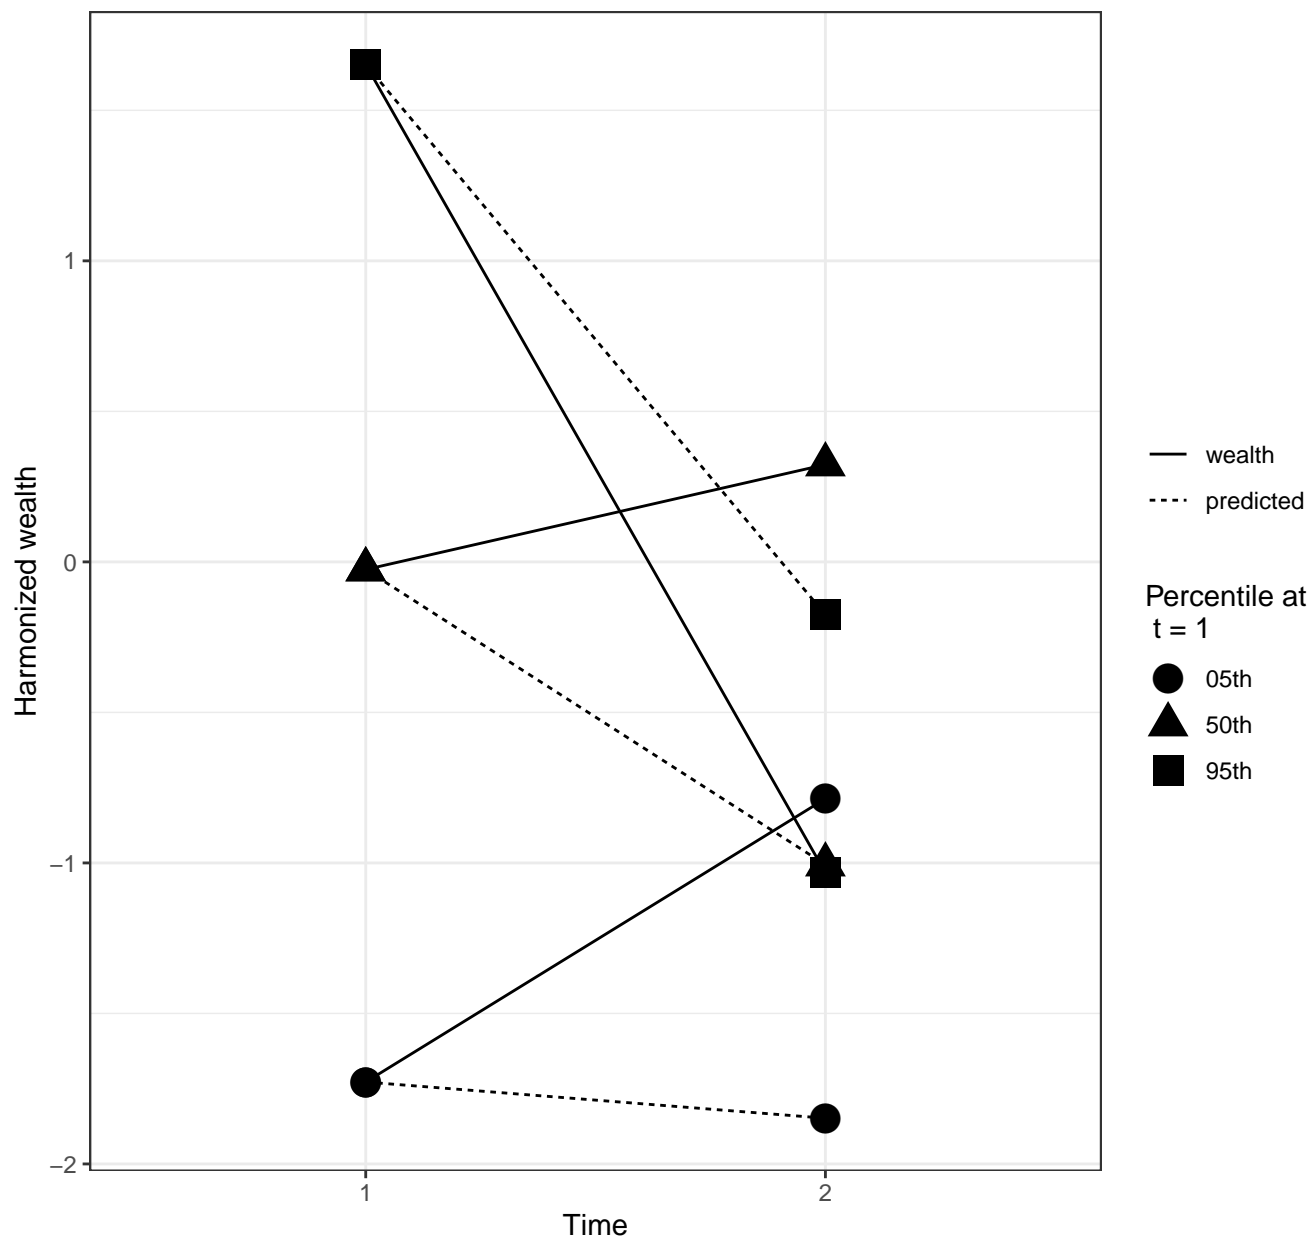

$w_2 = -0.5 + 0.5 \cdot w_1 + N(0,1);$   
Variance at time 2: time 1 = 1.2

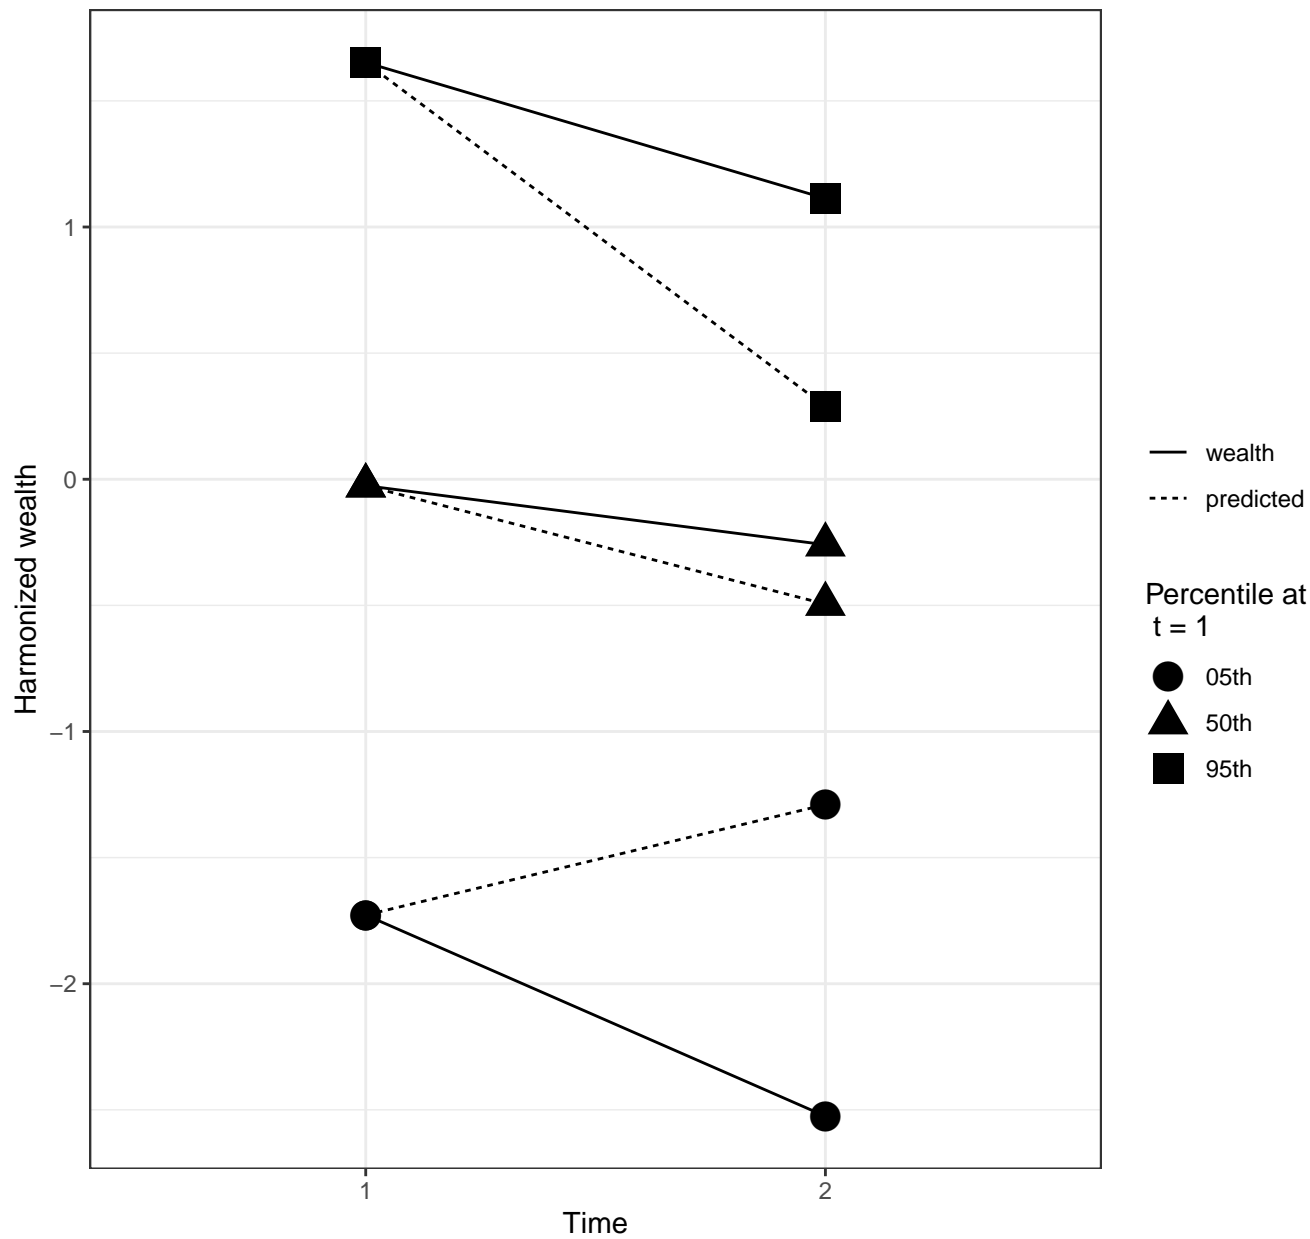

$w_2 = -0.3 + 0.5 \cdot w_1 + N(0,1);$   
Variance at time 2: time 1 = 1.3

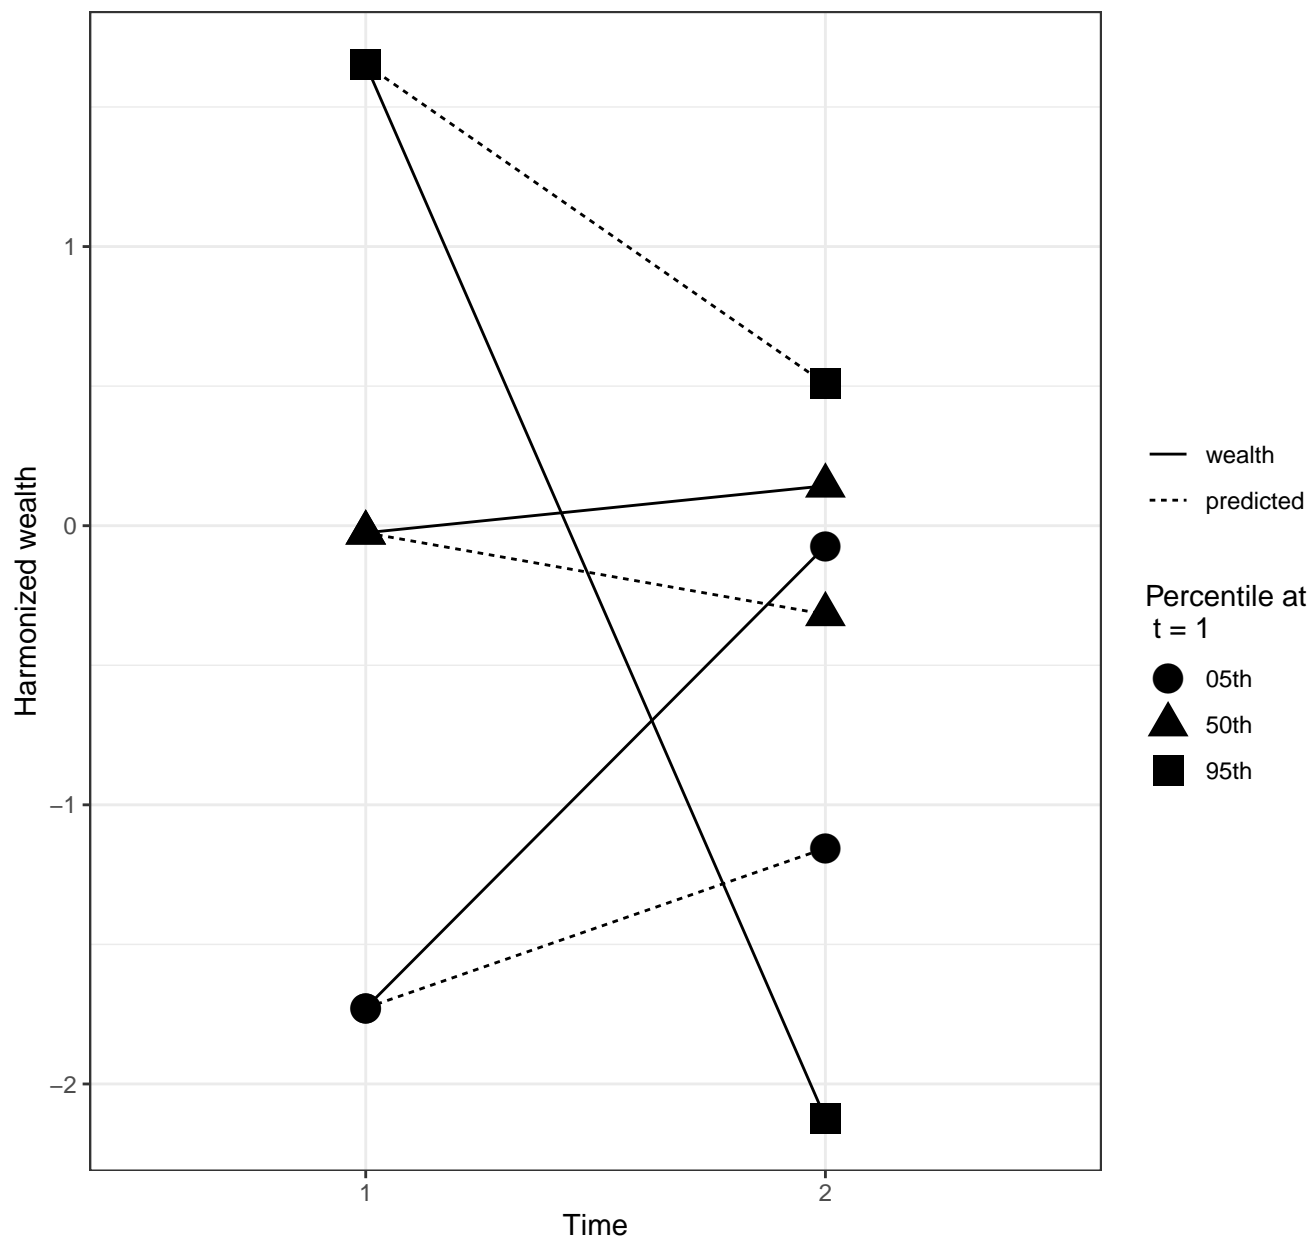

$w_2 = 0 + 0.5 \cdot w_1 + N(0,1);$   
Variance at time 2: time 1 = 1.2

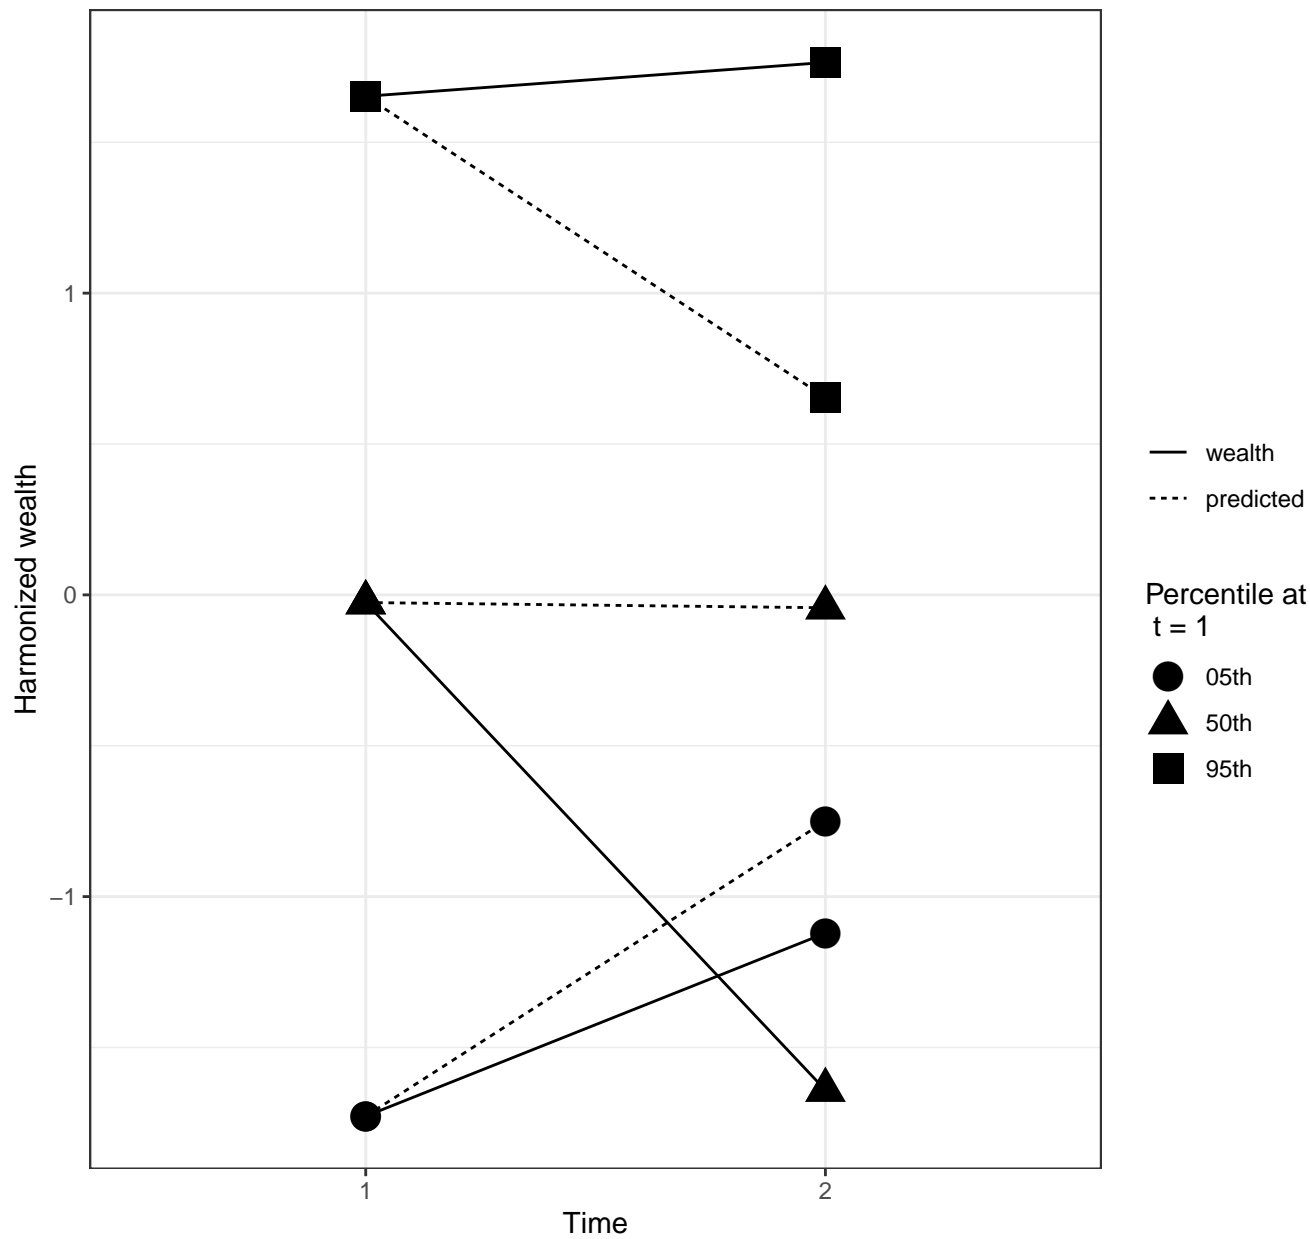

$w_2 = 0.3 + 0.5 \cdot w_1 + N(0,1);$   
Variance at time 2: time 1 = 1.3

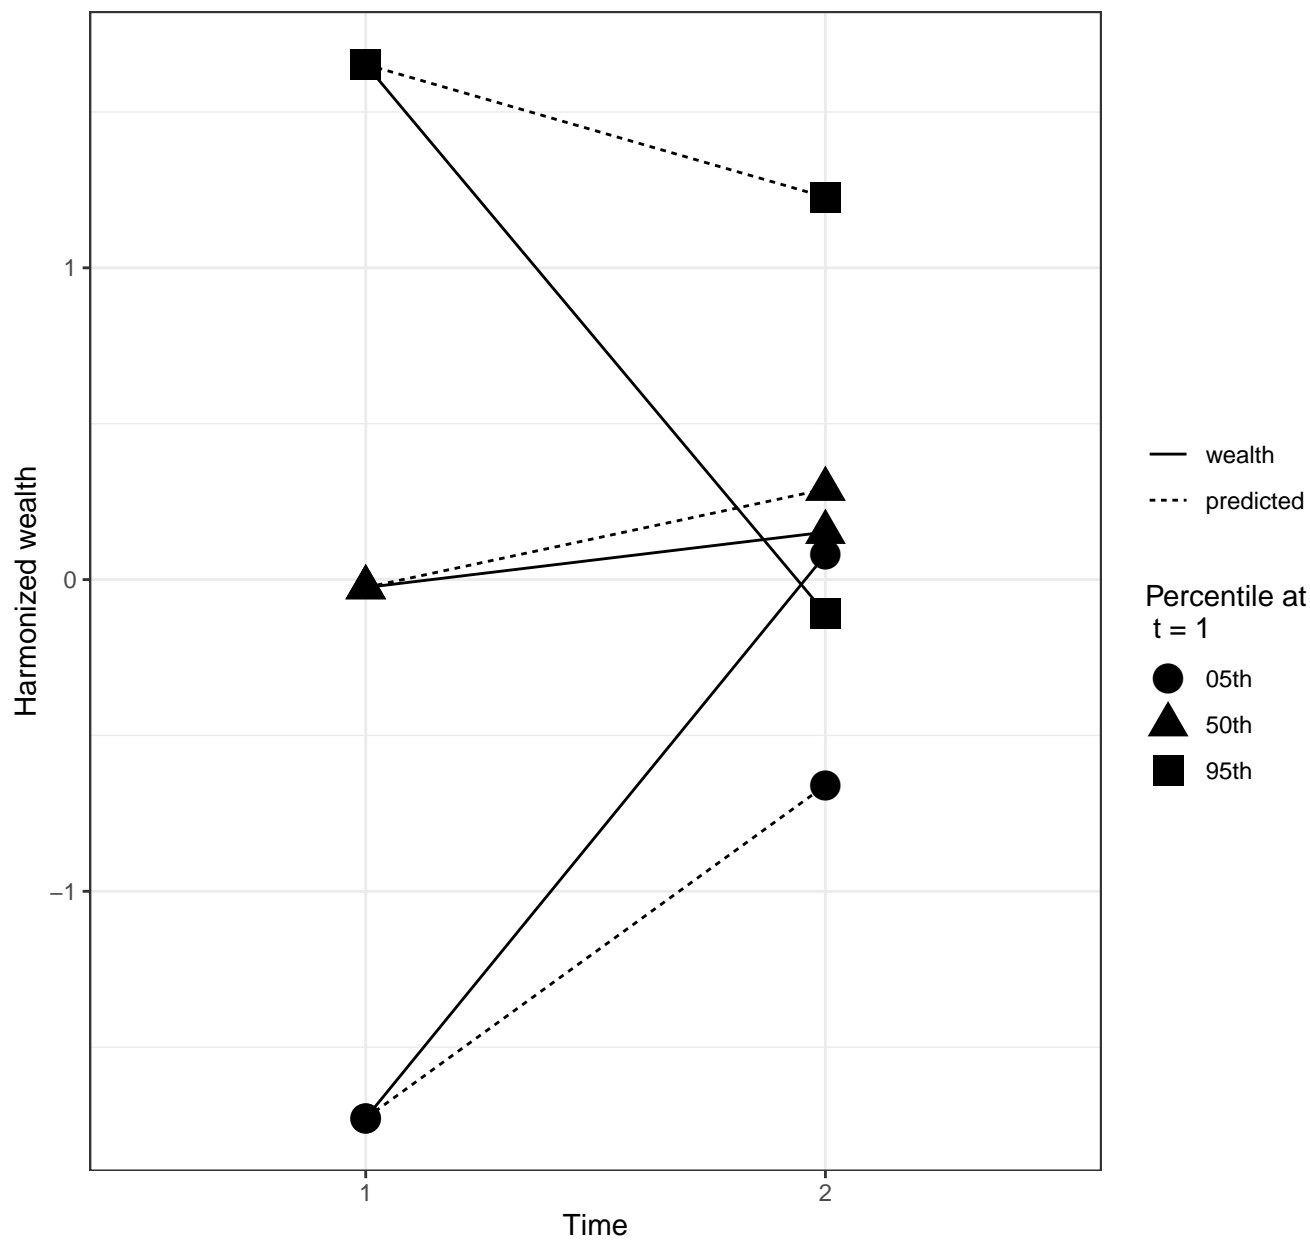



$w_2 = 0.5 + 0.5 \cdot w_1 + N(0,1);$   
Variance at time 2: time 1 = 1.3

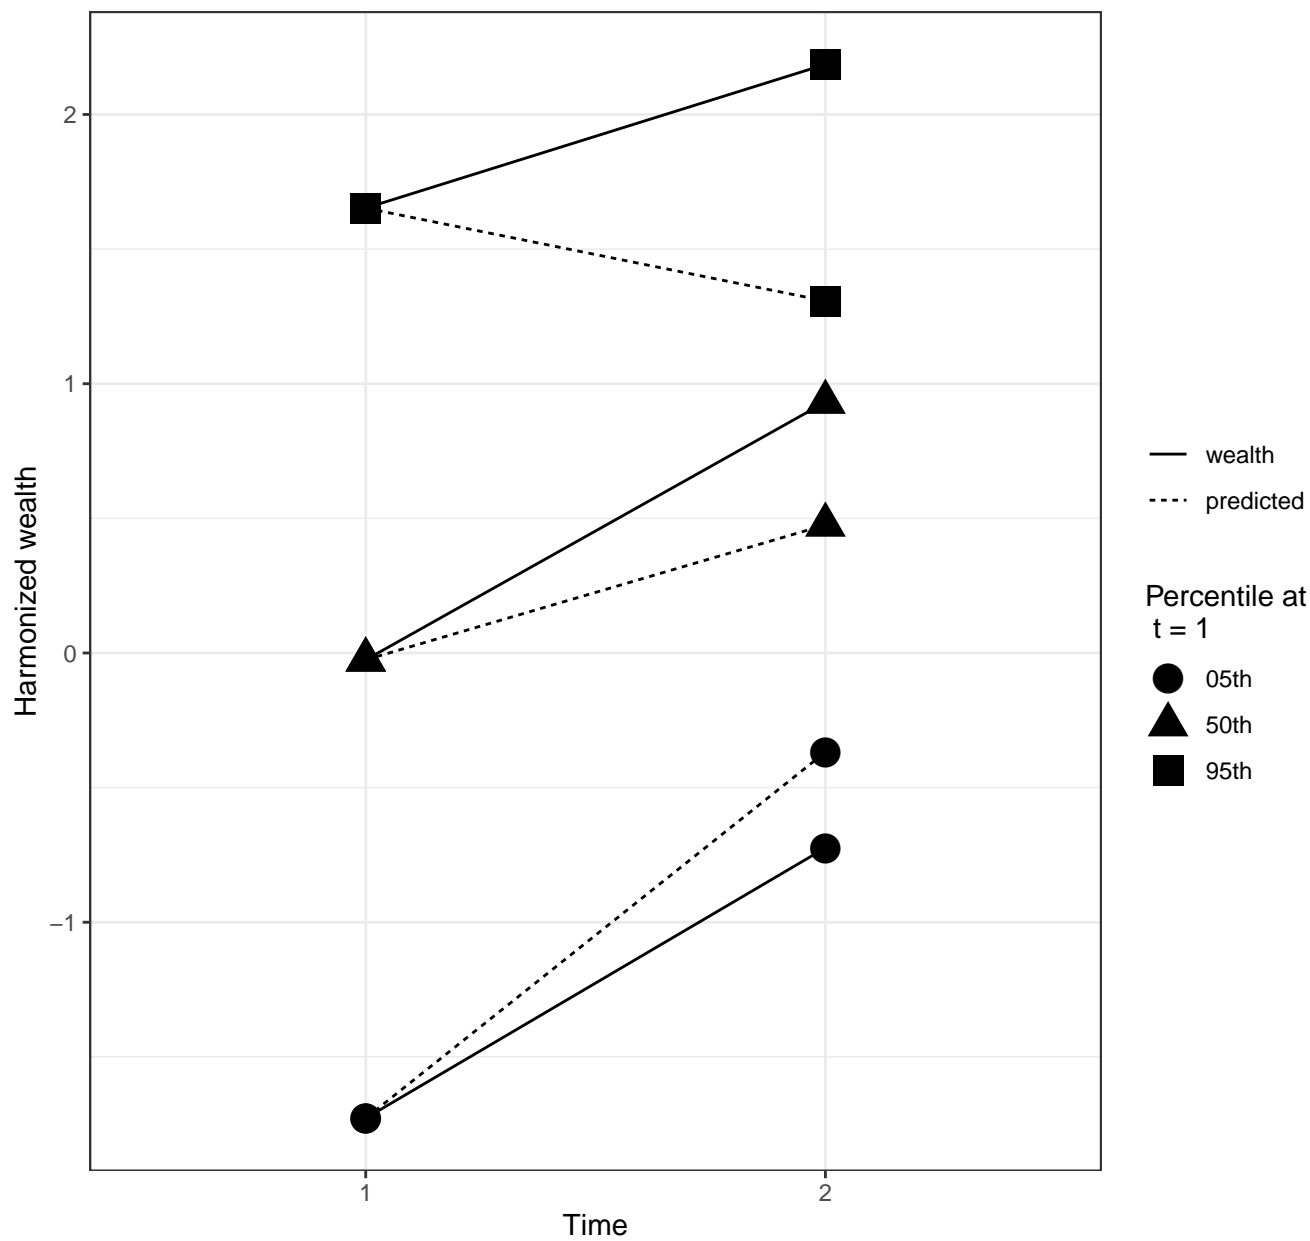

$w_2 = 1 + 0.5 \cdot w_1 + N(0,1);$   
Variance at time 2: time 1 = 1.2

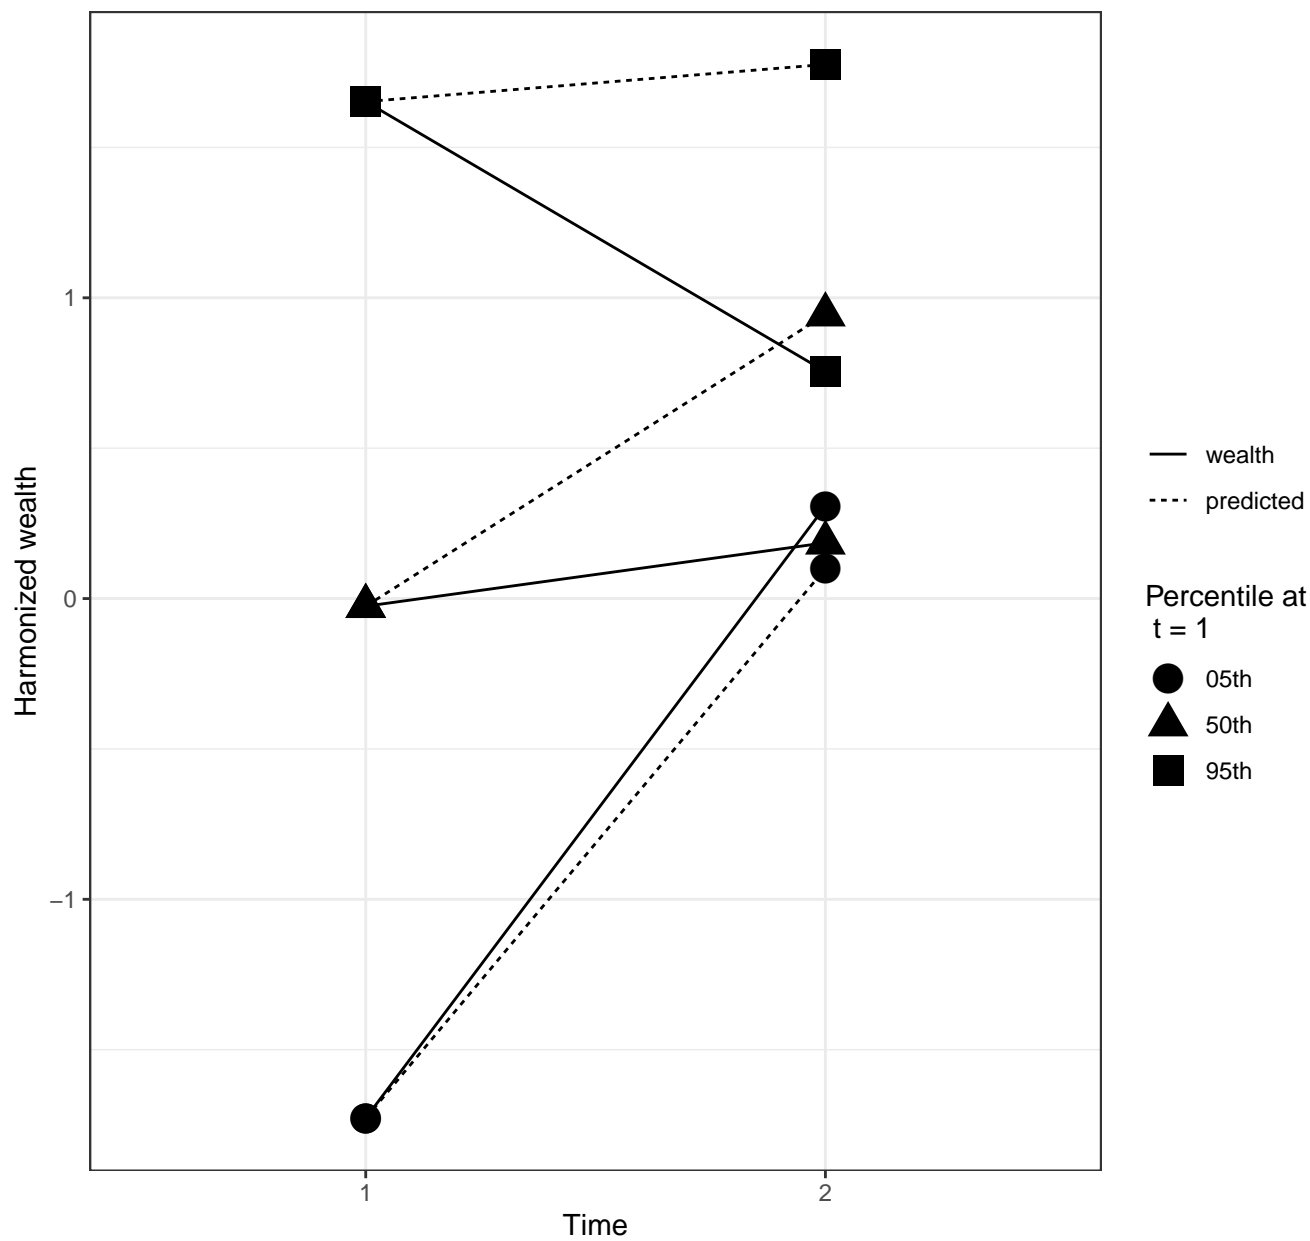

$w_2 = -1 + 1 \cdot w_1 + N(0,1);$   
Variance at time 2: time 1 = 2

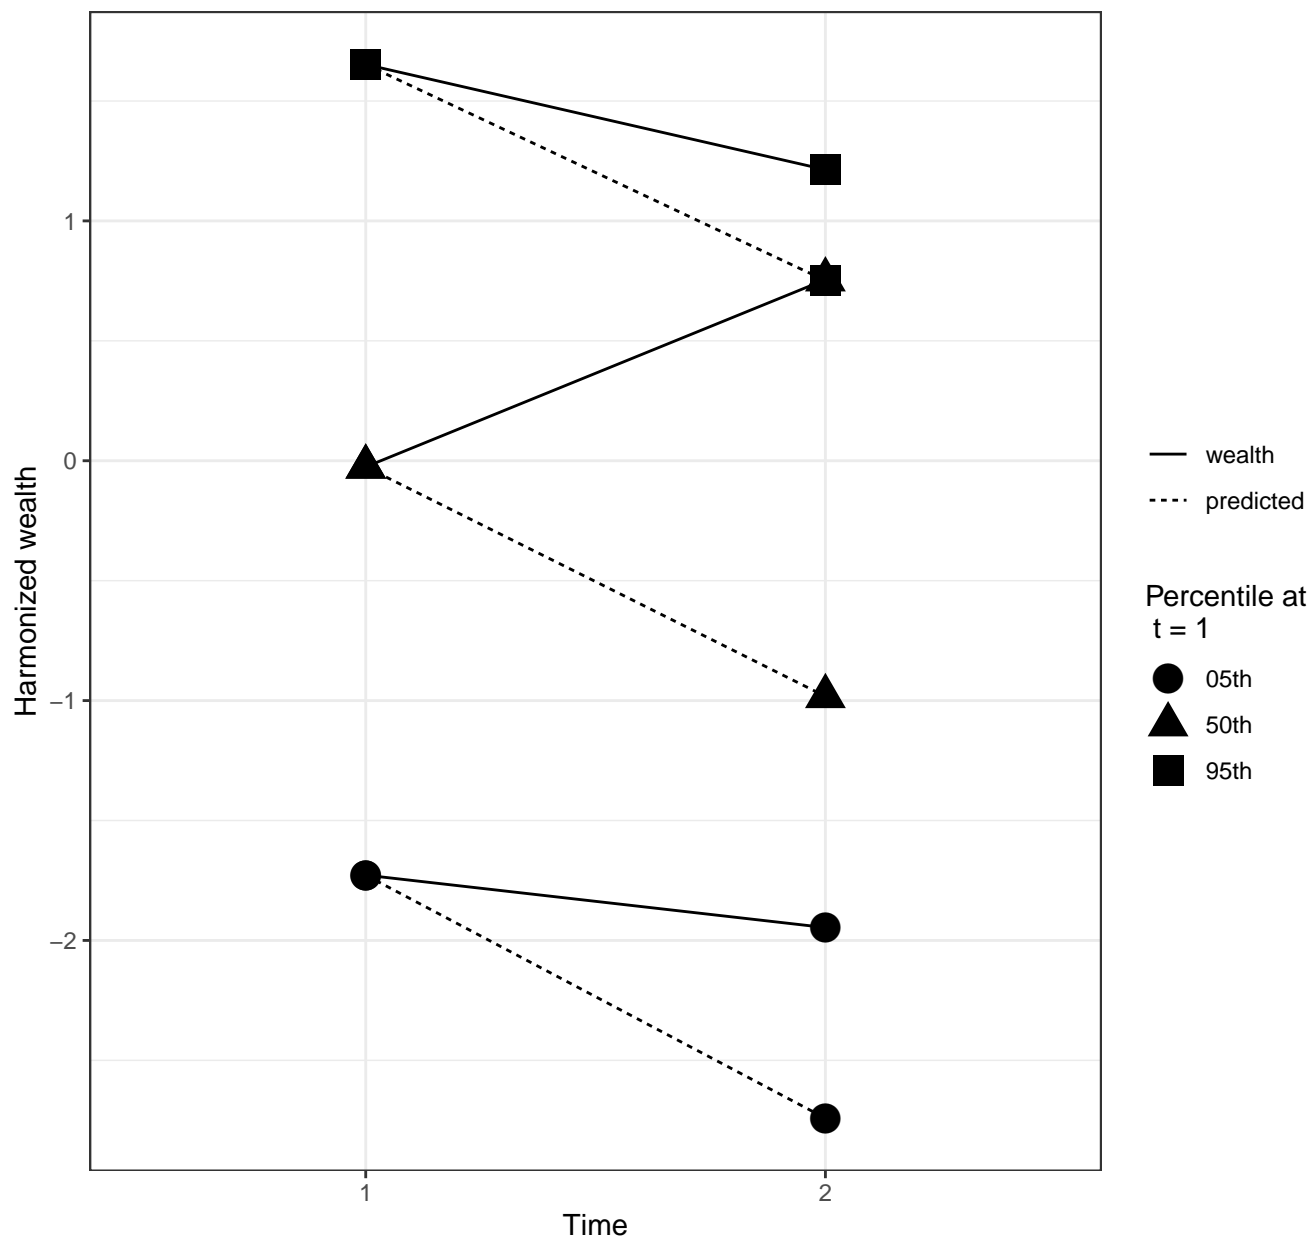

$w_2 = -0.5 + 1 \cdot w_1 + N(0,1);$   
Variance at time 2: time 1 = 2.2

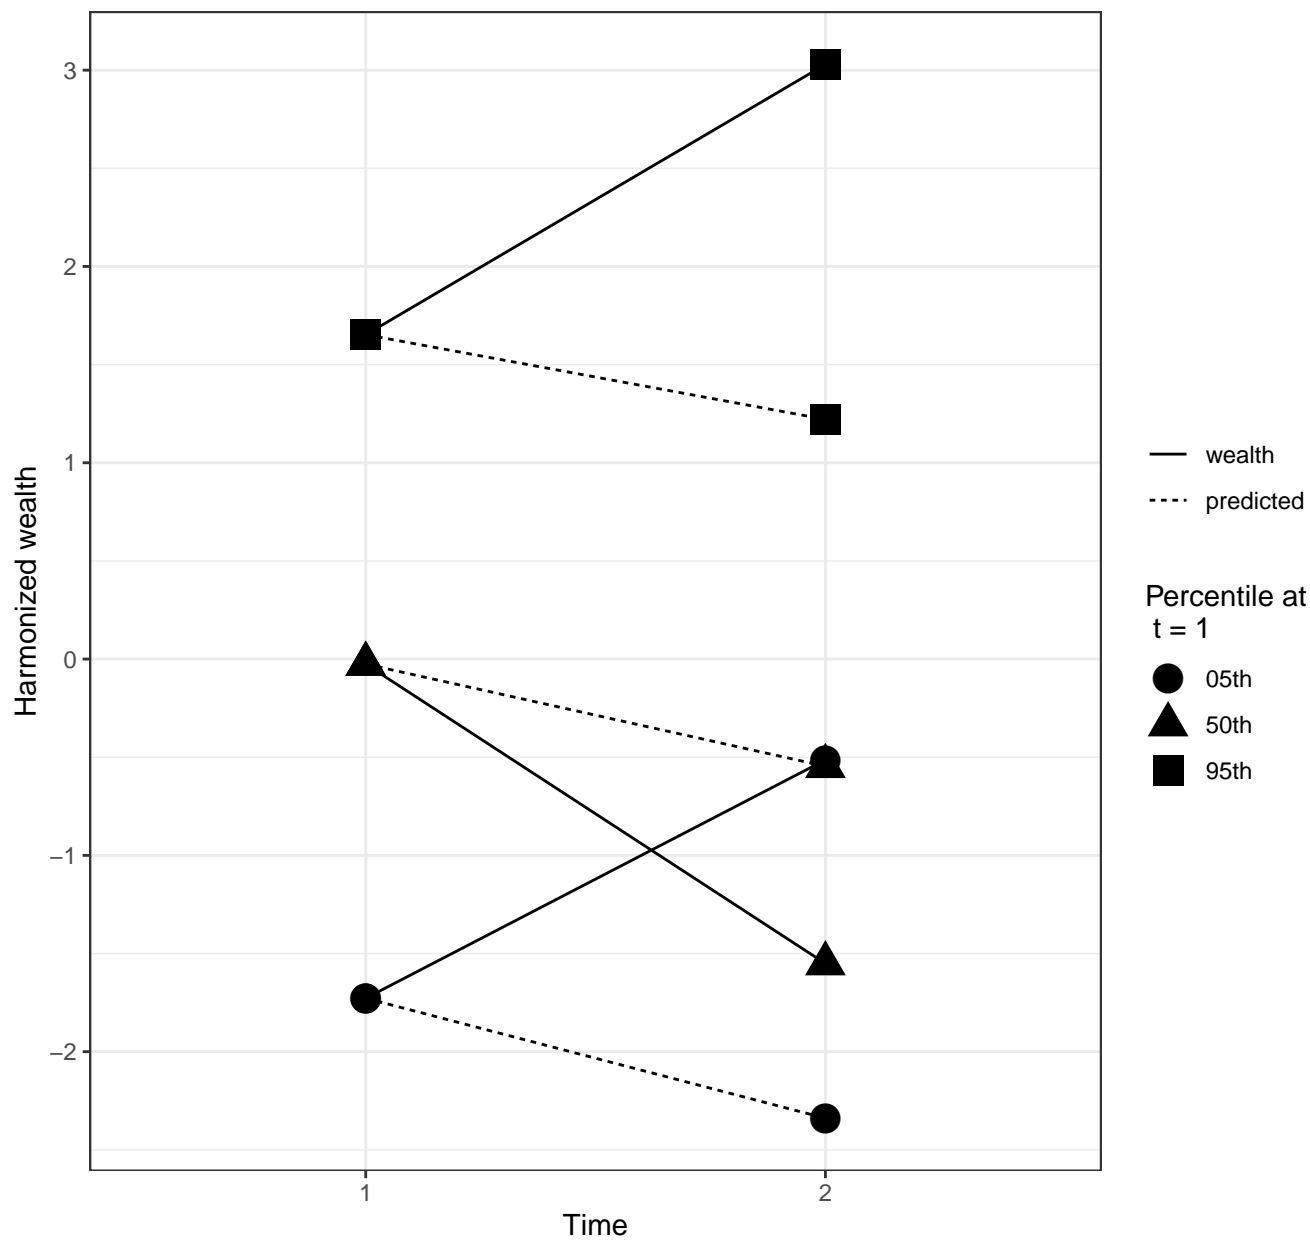

$w_2 = -0.3 + 1 \cdot w_1 + N(0,1);$   
Variance at time 2: time 1 = 2.1

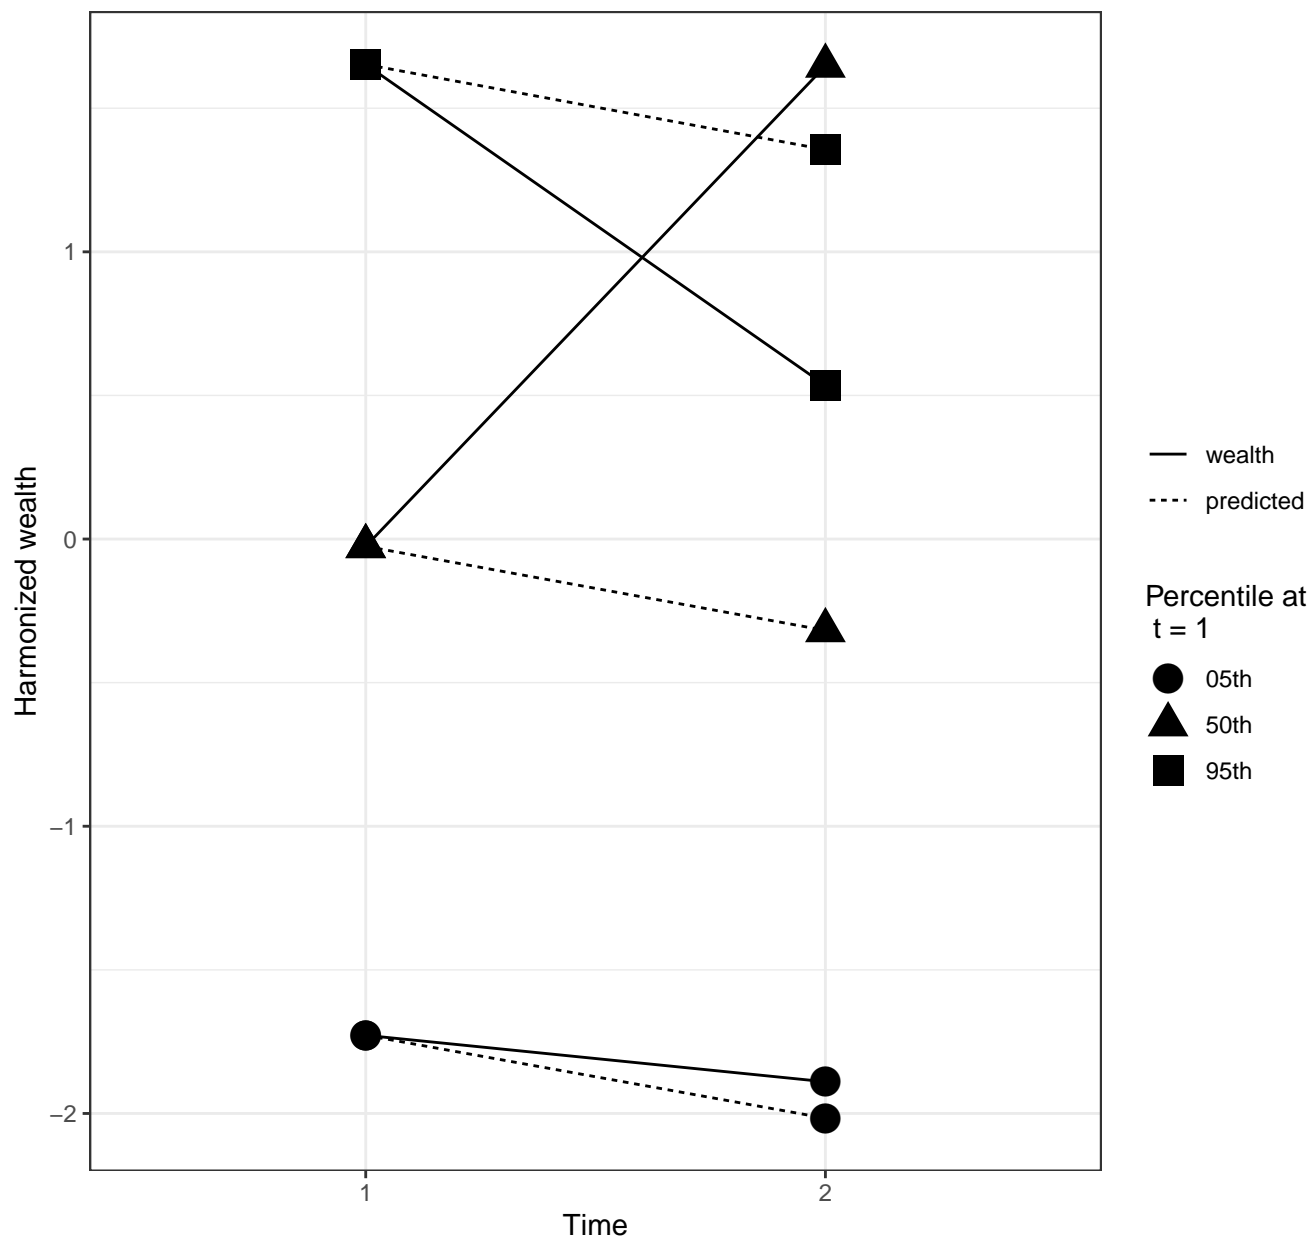

$w_2 = 0 + 1 \cdot w_1 + N(0,1);$   
Variance at time 2: time 1 = 2.1

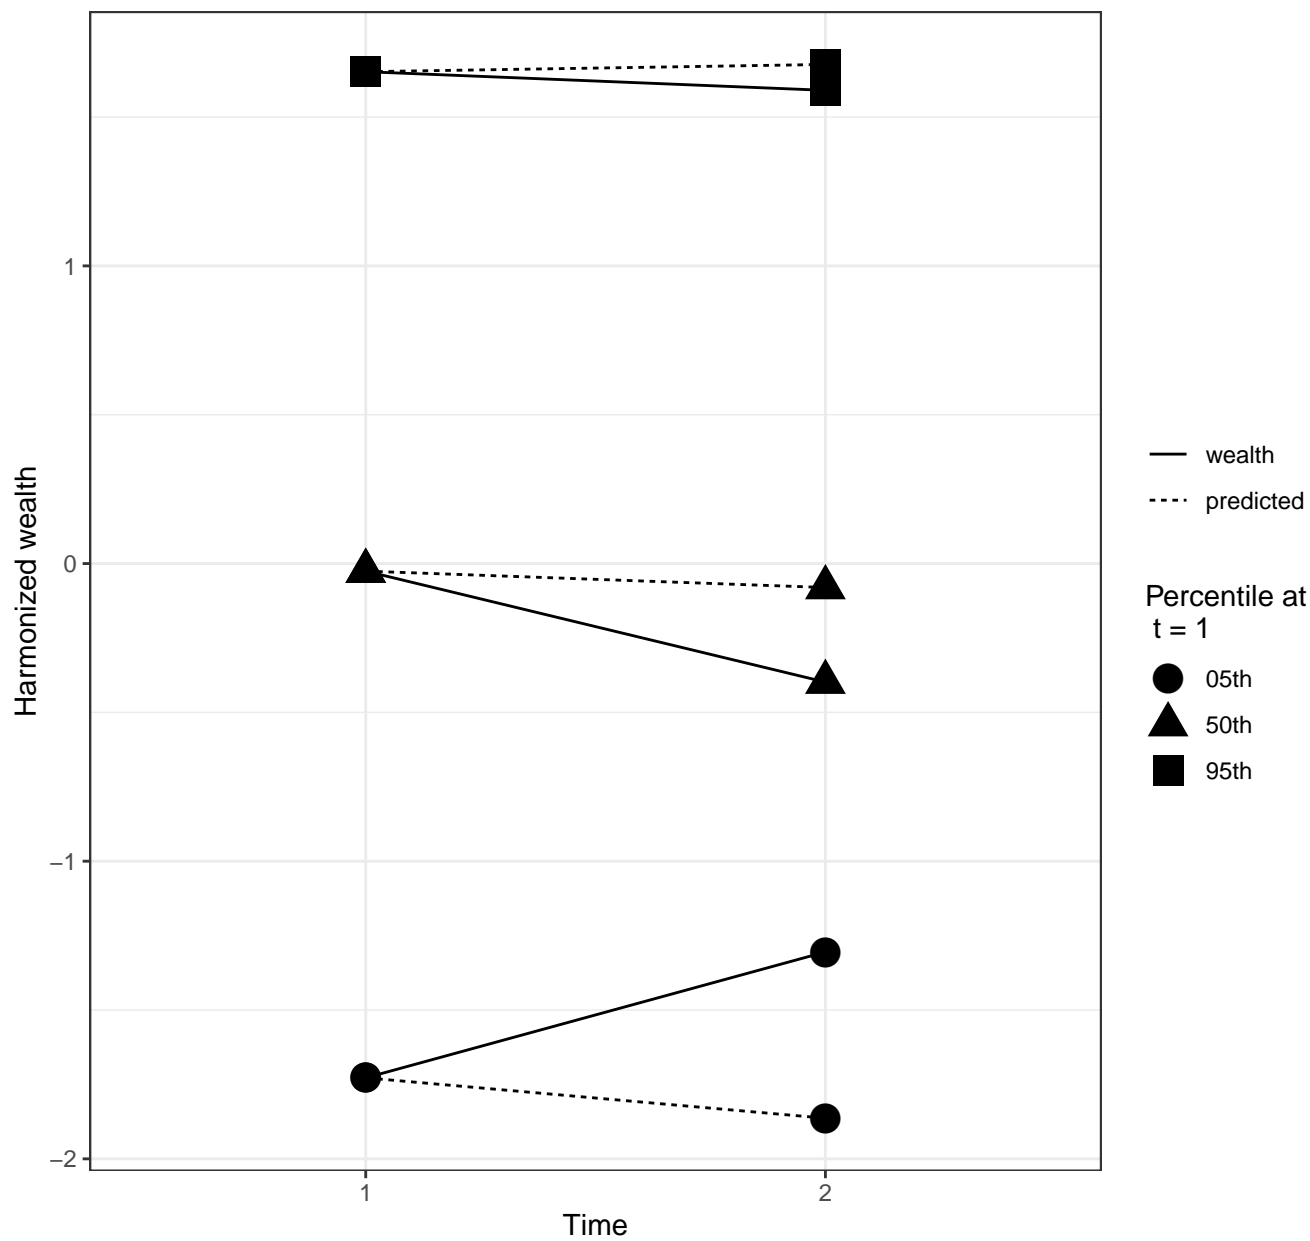

$w_2 = 0.3 + 1 \cdot w_1 + N(0,1);$   
Variance at time 2: time 1 = 2

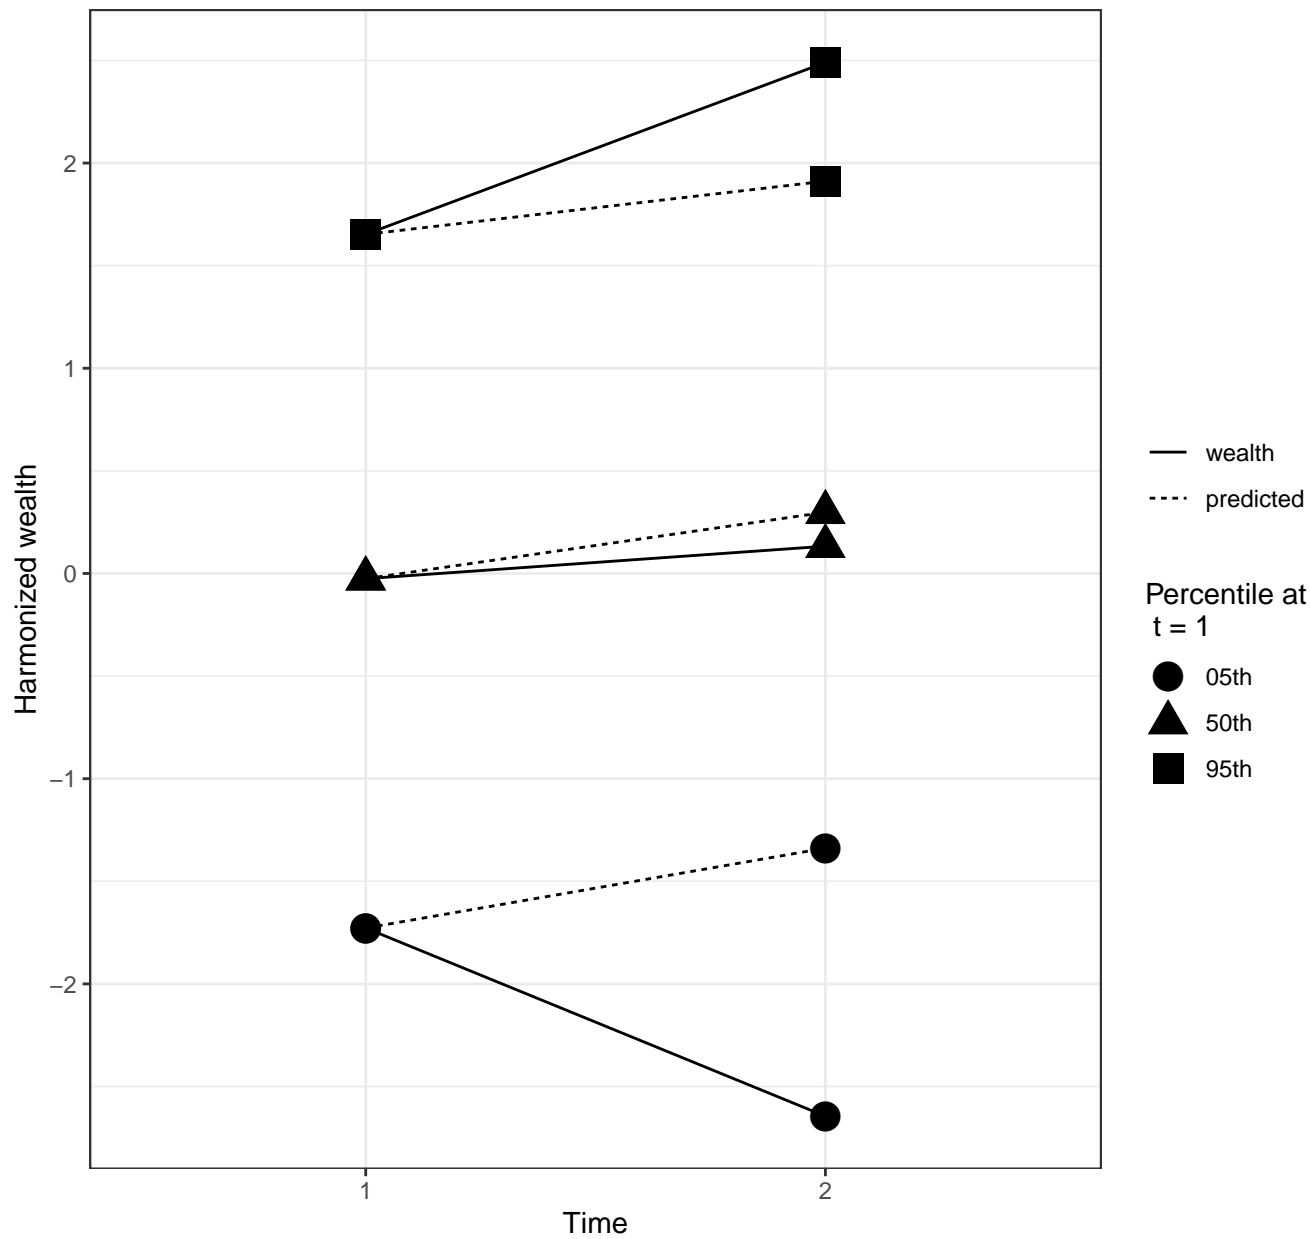

$w_2 = 0.5 + 1 \cdot w_1 + N(0,1);$   
Variance at time 2: time 1 = 2.1

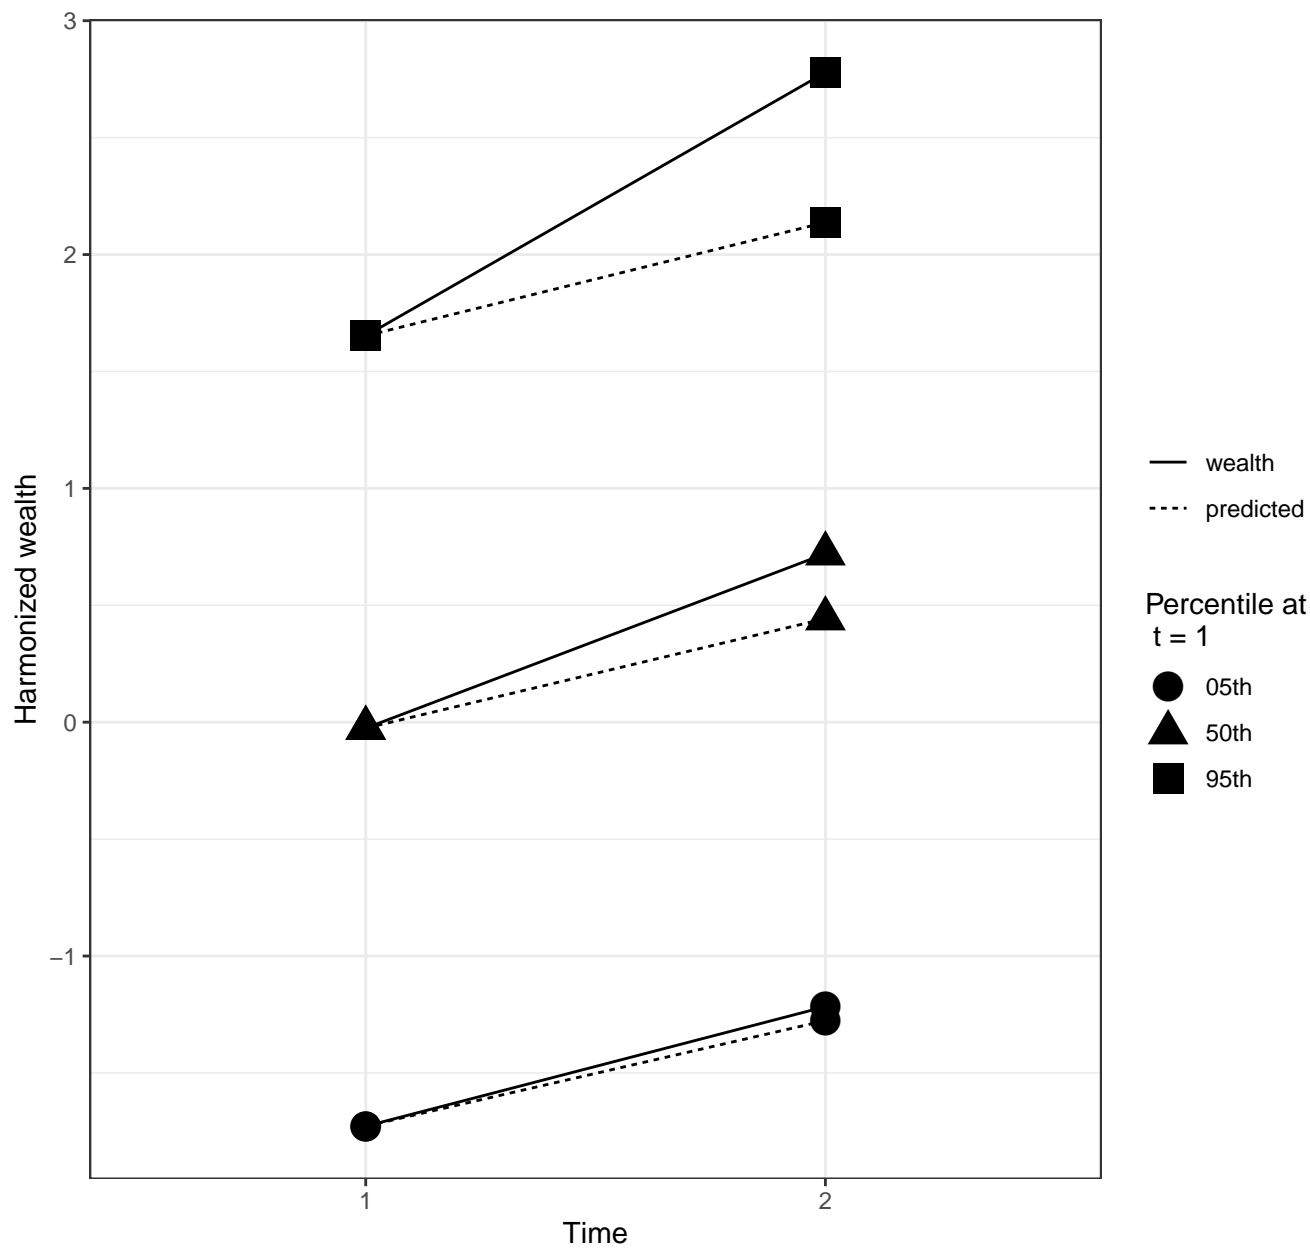



$w_2 = 1 + 1 \cdot w_1 + N(0,1);$   
Variance at time 2: time 1 = 2.1

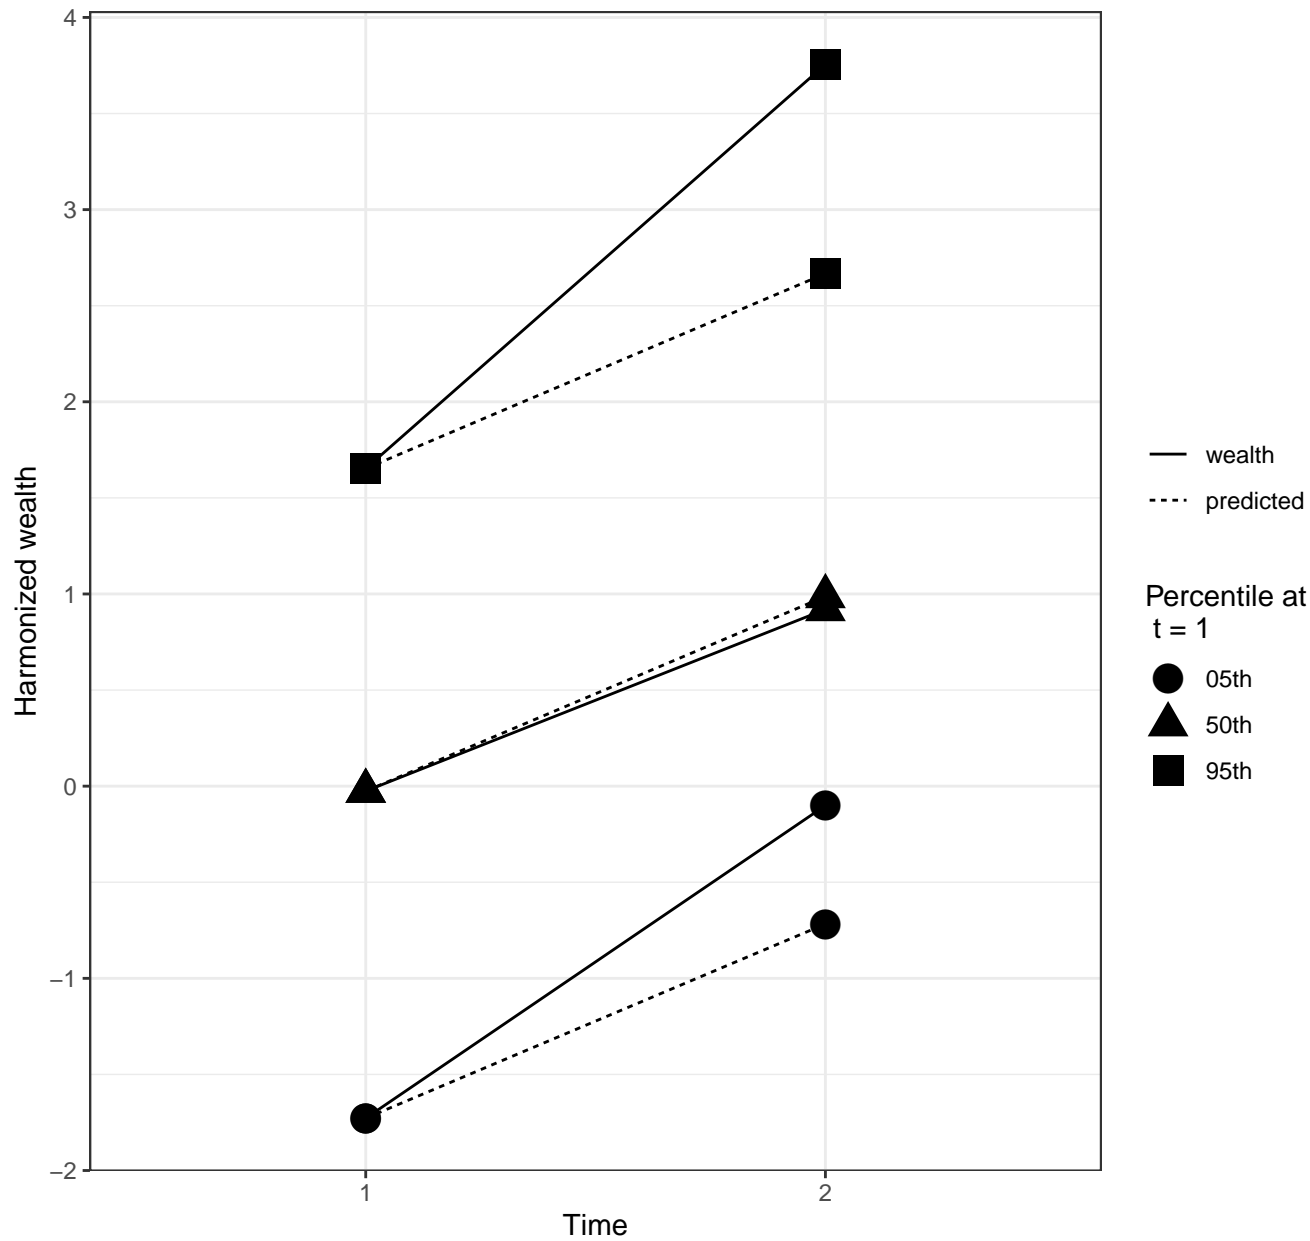

Supplement: Supplementary file 1 [file 3a27b0de163bc817ed2a4813.pdf]
